# Supplementary material for: A seven-sex species recognizes self and non-self mating-type via a novel protein complex
Source: bioRxiv preprint, doi:10.1101/2023.11.08.566168, version 2 (2024-01-16)
Supplement: Supplemental Data 1 [file 566168_file06.xlsx]

## Sheet: Sheet1
Figure 3–Source data 1. IP-MS results.
Bait	Prey	IP (Bait-stage-replicate)	Spec	SpecSum	NumRep	Prob	iProb	ctrlCounts	AvgP	MaxP	FDR
MRC1	TTHERM_00431360	IP_MRC1-S-3|IP_MRC1-S-2|IP_MRC1-S-1|IP_MRC1-CO-2|IP_MRC1-CO-1|IP_MRC1-C-1	55|16|25|18|14|15	143	6	1	1.00|1.00|1.00|1.00|1.00|1.00	0	0.9992	1	0.0008
MTA	TTHERM_01087810	IP_AHA-S-2|IP_AHA-S-1|IP_AHA-CO-2|IP_AHA-CO-1|IP_AHA-C-3|IP_AHA-C-2|IP_AHA-C-1	14|43|16|21|34|32|25	185	7	1	1.00|1.00|1.00|0.99|1.00|1.00|1.00	0	0.9989	1	0.0011
MTA	TTHERM_00431360	IP_AHA-S-2|IP_AHA-S-1|IP_AHA-CO-2|IP_AHA-CO-1|IP_AHA-C-3|IP_AHA-C-2|IP_AHA-C-1	16|48|19|20|44|41|8	196	7	1	1.00|1.00|1.00|0.99|1.00|1.00|1.00	0	0.9986	1	0.0012
MTA	TTHERM_00042670	IP_AHA-S-2|IP_AHA-S-1|IP_AHA-CO-2|IP_AHA-CO-1|IP_AHA-C-3|IP_AHA-C-2|IP_AHA-C-1	2|6|3|12|12|7|4	46	7	0.88	0.95|0.98|0.90|0.63|1.00|1.00|0.73	0	0.8843	0.995	0.0394
MRC1	TTHERM_00042670	IP_MRC1-S-3|IP_MRC1-S-2|IP_MRC1-S-1|IP_MRC1-CO-2|IP_MRC1-CO-1|IP_MRC1-C-1	14|4|6|3|2|6	35	6	0.87	0.87|0.97|0.98|0.97|0.60|0.98	0	0.8954	0.9825	0.0527
MRC1	TTHERM_01087810	IP_MRC1-S-3|IP_MRC1-S-2|IP_MRC1-S-1|IP_MRC1-CO-2|IP_MRC1-CO-1|IP_MRC1-C-1	26|5|10|5|2|5	53	6	0.88	0.94|0.99|1.00|0.98|0.37|0.98	0	0.8746	0.9975	0.0769
MTA	TTHERM_00387080	IP_AHA-S-2|IP_AHA-S-1|IP_AHA-CO-2|IP_AHA-CO-1|IP_AHA-C-3|IP_AHA-C-2|IP_AHA-C-1	4|12|1|2|8|4|8	39	7	0.8	0.96|0.98|0.11|0.62|0.98|0.97|0.71	0	0.7636	0.985	0.0887
MTA	TTHERM_00202970	IP_AHA-S-2|IP_AHA-S-1|IP_AHA-CO-2|IP_AHA-CO-1|IP_AHA-C-3|IP_AHA-C-2|IP_AHA-C-1	1|4|0|2|2|10|1	20	7	0.69	0.60|0.95|0.00|0.61|0.89|0.98|0.67	0	0.6711	0.98	0.1367
MTA	TTHERM_01087820	IP_AHA-S-2|IP_AHA-S-1|IP_AHA-CO-2|IP_AHA-CO-1|IP_AHA-C-3|IP_AHA-C-2|IP_AHA-C-1	0|5|0|2|6|9|6	28	7	0.63	0.00|0.96|0.00|0.65|0.97|0.99|0.73	0	0.6161	0.99	0.1779
MTB	TTHERM_00833720	IP_BHA-CO-2|IP_BHA-CO-1	1|5	6	2	0.78	0.56|1.00	0	0.7788	0.995	0.2212
MTA	TTHERM_00923170	IP_AHA-S-2|IP_AHA-S-1|IP_AHA-CO-2|IP_AHA-CO-1|IP_AHA-C-3|IP_AHA-C-2|IP_AHA-C-1	7|6|0|3|1|0|7	24	7	0.47	0.93|0.96|0.00|0.57|0.31|0.00|0.73	0	0.5021	0.965	0.2236
MTB	TTHERM_01087820	IP_BHA-CO-2|IP_BHA-CO-1	1|5	6	2	0.72	0.49|0.99	0	0.7425	0.9925	0.2394
MRC1	TTHERM_00522650	IP_MRC1-S-3|IP_MRC1-S-2|IP_MRC1-S-1|IP_MRC1-CO-2|IP_MRC1-CO-1|IP_MRC1-C-1	0|4|1|1|9|3	18	6	0.64	0.00|0.95|0.50|0.56|0.99|0.93	0	0.6542	0.99	0.1442
MRC1	TTHERM_00335730	IP_MRC1-S-3|IP_MRC1-S-2|IP_MRC1-S-1|IP_MRC1-CO-2|IP_MRC1-CO-1|IP_MRC1-C-1	1|4|0|1|2|3	11	6	0.67	0.57|0.94|0.00|0.61|0.81|0.89	0	0.6375	0.945	0.1878
MRC1	TTHERM_00313090	IP_MRC1-S-3|IP_MRC1-S-2|IP_MRC1-S-1|IP_MRC1-CO-2|IP_MRC1-CO-1|IP_MRC1-C-1	0|7|2|0|3|1	13	6	0.54	0.00|0.97|0.84|0.00|0.88|0.51	0	0.5321	0.9675	0.2345
MTA	TTHERM_00624740	IP_AHA-S-2|IP_AHA-S-1|IP_AHA-CO-2|IP_AHA-CO-1|IP_AHA-C-3|IP_AHA-C-2|IP_AHA-C-1	3|1|4|0|0|3|0	11	7	0.46	0.86|0.65|0.94|0.00|0.00|0.93|0.00	0	0.4839	0.9425	0.2602
MRC1	TTHERM_00590130	IP_MRC1-S-3|IP_MRC1-S-2|IP_MRC1-S-1|IP_MRC1-CO-2|IP_MRC1-CO-1|IP_MRC1-C-1	0|3|3|0|3|1	10	6	0.51	0.00|0.87|0.90|0.00|0.87|0.56	0	0.5312	0.8975	0.268
MTA	TTHERM_00245360	IP_AHA-S-2|IP_AHA-S-1|IP_AHA-CO-2|IP_AHA-CO-1|IP_AHA-C-3|IP_AHA-C-2|IP_AHA-C-1	0|2|1|0|4|7|0	14	7	0.46	0.00|0.84|0.36|0.00|0.94|0.96|0.00	0	0.4436	0.96	0.2931
MRC1	TTHERM_00219250	IP_MRC1-S-3|IP_MRC1-S-2|IP_MRC1-S-1|IP_MRC1-CO-2|IP_MRC1-CO-1|IP_MRC1-C-1	0|2|0|4|2|1	9	6	0.52	0.00|0.81|0.00|0.85|0.80|0.56	0	0.5025	0.85	0.2967
MRC1	TTHERM_00471950	IP_MRC1-S-3|IP_MRC1-S-2|IP_MRC1-S-1|IP_MRC1-CO-2|IP_MRC1-CO-1|IP_MRC1-C-1	0|20|1|0|19|12	52	6	0.48	0.00|1.00|0.00|0.00|0.99|0.98	6	0.4942	0.995	0.3199
MTA	TTHERM_00530250	IP_AHA-S-2|IP_AHA-S-1|IP_AHA-CO-2|IP_AHA-CO-1|IP_AHA-C-3|IP_AHA-C-2|IP_AHA-C-1	2|3|2|0|0|1|0	8	7	0.41	0.79|0.89|0.84|0.00|0.00|0.51|0.00	0	0.4336	0.89	0.3204
MRC1	TTHERM_00361400	IP_MRC1-S-3|IP_MRC1-S-2|IP_MRC1-S-1|IP_MRC1-CO-2|IP_MRC1-CO-1|IP_MRC1-C-1	0|2|3|1|2|0	8	6	0.46	0.00|0.75|0.84|0.60|0.76|0.00	0	0.4917	0.8375	0.3387
MTA	TTHERM_00219300	IP_AHA-S-2|IP_AHA-S-1|IP_AHA-CO-2|IP_AHA-CO-1|IP_AHA-C-3|IP_AHA-C-2|IP_AHA-C-1	0|2|3|0|1|1|0	7	7	0.37	0.00|0.83|0.90|0.00|0.65|0.60|0.00	0	0.4264	0.8975	0.3434
MRC1	TTHERM_00401940	IP_MRC1-S-3|IP_MRC1-S-2|IP_MRC1-S-1|IP_MRC1-CO-2|IP_MRC1-CO-1|IP_MRC1-C-1	2|4|4|0|1|0	11	6	0.48	0.72|0.93|0.94|0.00|0.34|0.00	0	0.4883	0.9375	0.3545
MTA	TTHERM_00877050	IP_AHA-S-2|IP_AHA-S-1|IP_AHA-CO-2|IP_AHA-CO-1|IP_AHA-C-3|IP_AHA-C-2|IP_AHA-C-1	3|1|0|0|1|3|0	8	7	0.47	0.81|0.62|0.00|0.00|0.64|0.90|0.00	0	0.425	0.9025	0.3627
MRC1	TTHERM_00530250	IP_MRC1-S-3|IP_MRC1-S-2|IP_MRC1-S-1|IP_MRC1-CO-2|IP_MRC1-CO-1|IP_MRC1-C-1	0|3|4|0|1|3	11	6	0.49	0.00|0.83|0.88|0.00|0.39|0.82	0	0.4879	0.885	0.3676
MRC1	TTHERM_000251239	IP_MRC1-S-3|IP_MRC1-S-2|IP_MRC1-S-1|IP_MRC1-CO-2|IP_MRC1-CO-1|IP_MRC1-C-1	0|0|27|11|0|17	55	6	0.48	0.00|0.00|0.97|0.94|0.00|0.97	0	0.4804	0.97	0.3793
MTA	TTHERM_00502130	IP_AHA-S-2|IP_AHA-S-1|IP_AHA-CO-2|IP_AHA-CO-1|IP_AHA-C-3|IP_AHA-C-2|IP_AHA-C-1	0|4|3|1|1|0|0	9	7	0.42	0.00|0.87|0.88|0.57|0.56|0.00|0.00	0	0.4114	0.8825	0.3801
MRC1	TTHERM_00160770	IP_MRC1-S-3|IP_MRC1-S-2|IP_MRC1-S-1|IP_MRC1-CO-2|IP_MRC1-CO-1|IP_MRC1-C-1	3|8|8|0|7|1	27	6	0.45	0.05|0.96|0.99|0.00|0.87|0.00	3	0.4783	0.99	0.3895
MTA	TTHERM_00833720	IP_AHA-S-2|IP_AHA-S-1|IP_AHA-CO-2|IP_AHA-CO-1|IP_AHA-C-3|IP_AHA-C-2|IP_AHA-C-1	0|11|8|0|0|4|0	23	7	0.39	0.00|0.97|0.97|0.00|0.00|0.93|0.00	0	0.4107	0.975	0.3951
MRC1	TTHERM_01250100	IP_MRC1-S-3|IP_MRC1-S-2|IP_MRC1-S-1|IP_MRC1-CO-2|IP_MRC1-CO-1|IP_MRC1-C-1	0|3|0|0|6|6	15	6	0.45	0.00|0.90|0.00|0.00|0.97|0.95	0	0.4717	0.9725	0.3987
MRC1	TTHERM_00641150	IP_MRC1-S-3|IP_MRC1-S-2|IP_MRC1-S-1|IP_MRC1-CO-2|IP_MRC1-CO-1|IP_MRC1-C-1	0|6|7|0|3|0	16	6	0.47	0.00|0.97|0.96|0.00|0.87|0.00	0	0.4683	0.9725	0.407
MTA	TTHERM_01435670	IP_AHA-S-2|IP_AHA-S-1|IP_AHA-CO-2|IP_AHA-CO-1|IP_AHA-C-3|IP_AHA-C-2|IP_AHA-C-1	0|1|2|0|1|2|0	6	7	0.41	0.00|0.66|0.76|0.00|0.60|0.81|0.00	0	0.4043	0.805	0.4084
MTB	TTHERM_00715760	IP_BHA-CO-2|IP_BHA-CO-1	0|13	13	2	0.48	0.00|1.00	2	0.5	1	0.4131
MTB	TTHERM_00494370	IP_BHA-CO-2|IP_BHA-CO-1	0|8	8	2	0.54	0.00|1.00	0	0.5	1	0.4131
MTB	TTHERM_00835120	IP_BHA-CO-2|IP_BHA-CO-1	0|15	15	2	0.52	0.00|1.00	2	0.5	1	0.4131
MTB	TTHERM_00706330	IP_BHA-CO-2|IP_BHA-CO-1	0|13	13	2	0.47	0.00|1.00	2	0.5	1	0.4131
MRC1	TTHERM_00046389	IP_MRC1-S-3|IP_MRC1-S-2|IP_MRC1-S-1|IP_MRC1-CO-2|IP_MRC1-CO-1|IP_MRC1-C-1	0|5|4|0|1|1	11	6	0.46	0.00|0.96|0.94|0.00|0.33|0.52	0	0.4583	0.9625	0.415
MTA	TTHERM_01044640	IP_AHA-S-2|IP_AHA-S-1|IP_AHA-CO-2|IP_AHA-CO-1|IP_AHA-C-3|IP_AHA-C-2|IP_AHA-C-1	0|2|3|0|4|0|0	9	7	0.39	0.00|0.84|0.89|0.00|0.90|0.00|0.00	0	0.3768	0.9	0.4219
MRC1	TTHERM_00202970	IP_MRC1-S-3|IP_MRC1-S-2|IP_MRC1-S-1|IP_MRC1-CO-2|IP_MRC1-CO-1|IP_MRC1-C-1	15|0|4|0|0|6	25	6	0.49	0.85|0.00|0.93|0.00|0.00|0.96	0	0.4567	0.9575	0.4221
MRC1	TTHERM_00938910	IP_MRC1-S-3|IP_MRC1-S-2|IP_MRC1-S-1|IP_MRC1-CO-2|IP_MRC1-CO-1|IP_MRC1-C-1	0|9|0|0|9|2	20	6	0.44	0.00|0.96|0.00|0.00|0.97|0.73	0	0.4429	0.9675	0.4292
MTA	TTHERM_00446390	IP_AHA-S-2|IP_AHA-S-1|IP_AHA-CO-2|IP_AHA-CO-1|IP_AHA-C-3|IP_AHA-C-2|IP_AHA-C-1	1|1|2|0|0|1|0	5	7	0.36	0.67|0.64|0.77|0.00|0.00|0.55|0.00	0	0.3754	0.775	0.4338
MRC1	TTHERM_00016170	IP_MRC1-S-3|IP_MRC1-S-2|IP_MRC1-S-1|IP_MRC1-CO-2|IP_MRC1-CO-1|IP_MRC1-C-1	0|2|1|0|3|1	7	6	0.42	0.00|0.72|0.52|0.00|0.84|0.49	0	0.4279	0.84	0.4363
MRC1	TTHERM_00219300	IP_MRC1-S-3|IP_MRC1-S-2|IP_MRC1-S-1|IP_MRC1-CO-2|IP_MRC1-CO-1|IP_MRC1-C-1	0|0|0|2|4|2	8	6	0.39	0.00|0.00|0.00|0.81|0.91|0.83	0	0.4258	0.9075	0.4429
MTA	TTHERM_00420900	IP_AHA-S-2|IP_AHA-S-1|IP_AHA-CO-2|IP_AHA-CO-1|IP_AHA-C-3|IP_AHA-C-2|IP_AHA-C-1	1|3|0|1|0|0|2	7	7	0.38	0.64|0.86|0.00|0.52|0.00|0.00|0.58	0	0.3711	0.86	0.4446
MRC1	TTHERM_00896100	IP_MRC1-S-3|IP_MRC1-S-2|IP_MRC1-S-1|IP_MRC1-CO-2|IP_MRC1-CO-1|IP_MRC1-C-1	0|3|2|0|3|0	8	6	0.39	0.00|0.87|0.80|0.00|0.86|0.00	0	0.4212	0.87	0.4491
MTA	TTHERM_00139640	IP_AHA-S-2|IP_AHA-S-1|IP_AHA-CO-2|IP_AHA-CO-1|IP_AHA-C-3|IP_AHA-C-2|IP_AHA-C-1	0|1|0|1|3|1|0	6	7	0.38	0.00|0.63|0.00|0.54|0.88|0.54|0.00	0	0.3696	0.8775	0.4544
MRC1	TTHERM_00046250	IP_MRC1-S-3|IP_MRC1-S-2|IP_MRC1-S-1|IP_MRC1-CO-2|IP_MRC1-CO-1|IP_MRC1-C-1	0|2|0|12|13|0	27	6	0.41	0.00|0.57|0.00|0.91|0.97|0.00	0	0.4104	0.9725	0.4552
MRC1	TTHERM_00237500	IP_MRC1-S-3|IP_MRC1-S-2|IP_MRC1-S-1|IP_MRC1-CO-2|IP_MRC1-CO-1|IP_MRC1-C-1	0|2|2|0|4|0	8	6	0.41	0.00|0.76|0.78|0.00|0.89|0.00	0	0.4067	0.895	0.4609
MTA	TTHERM_01367670	IP_AHA-S-2|IP_AHA-S-1|IP_AHA-CO-2|IP_AHA-CO-1|IP_AHA-C-3|IP_AHA-C-2|IP_AHA-C-1	1|0|1|0|1|2|0	5	7	0.4	0.66|0.00|0.47|0.00|0.59|0.85|0.00	0	0.3679	0.855	0.4633
MRC1	TTHERM_00633150	IP_MRC1-S-3|IP_MRC1-S-2|IP_MRC1-S-1|IP_MRC1-CO-2|IP_MRC1-CO-1|IP_MRC1-C-1	0|6|4|0|18|1	29	6	0.39	0.00|0.88|0.55|0.00|1.00|0.00	2	0.4058	1	0.4663
MTB	TTHERM_00492740	IP_BHA-CO-2|IP_BHA-CO-1	0|8	8	2	0.47	0.00|1.00	0	0.4988	0.9975	0.4682
MTB	TTHERM_00538790	IP_BHA-CO-2|IP_BHA-CO-1	0|8	8	2	0.46	0.00|1.00	0	0.4988	0.9975	0.4682
MTB	TTHERM_00227770	IP_BHA-CO-2|IP_BHA-CO-1	0|11	11	2	0.5	0.00|1.00	2	0.4988	0.9975	0.4682
MTB	TTHERM_00697420	IP_BHA-CO-2|IP_BHA-CO-1	0|7	7	2	0.52	0.00|1.00	0	0.4988	0.9975	0.4682
MTB	TTHERM_00474750	IP_BHA-CO-2|IP_BHA-CO-1	0|14	14	2	0.51	0.00|1.00	0	0.4988	0.9975	0.4682
MTB	TTHERM_00794540	IP_BHA-CO-2|IP_BHA-CO-1	0|19	19	2	0.5	0.00|1.00	4	0.4988	0.9975	0.4682
MTB	TTHERM_00705050	IP_BHA-CO-2|IP_BHA-CO-1	0|19	19	2	0.5	0.00|1.00	0	0.4988	0.9975	0.4682
MTB	TTHERM_00220750	IP_BHA-CO-2|IP_BHA-CO-1	0|10	10	2	0.48	0.00|1.00	2	0.4988	0.9975	0.4682
MTB	TTHERM_00637400	IP_BHA-CO-2|IP_BHA-CO-1	0|13	13	2	0.49	0.00|1.00	0	0.4988	0.9975	0.4682
MTB	TTHERM_00582070	IP_BHA-CO-2|IP_BHA-CO-1	0|17	17	2	0.5	0.00|1.00	2	0.4988	0.9975	0.4682
MTA	TTHERM_00780600	IP_AHA-S-2|IP_AHA-S-1|IP_AHA-CO-2|IP_AHA-CO-1|IP_AHA-C-3|IP_AHA-C-2|IP_AHA-C-1	0|3|2|0|4|0|0	9	7	0.38	0.00|0.88|0.75|0.00|0.92|0.00|0.00	0	0.3646	0.9175	0.4715
MRC1	TTHERM_00151190	IP_MRC1-S-3|IP_MRC1-S-2|IP_MRC1-S-1|IP_MRC1-CO-2|IP_MRC1-CO-1|IP_MRC1-C-1	0|0|0|4|2|2	8	6	0.43	0.00|0.00|0.00|0.89|0.69|0.77	0	0.3921	0.8875	0.4717
MRC1	TTHERM_00725990	IP_MRC1-S-3|IP_MRC1-S-2|IP_MRC1-S-1|IP_MRC1-CO-2|IP_MRC1-CO-1|IP_MRC1-C-1	0|7|0|1|5|0	13	6	0.4	0.00|0.95|0.00|0.44|0.93|0.00	0	0.3875	0.9525	0.4769
MTA	TTHERM_00218410	IP_AHA-S-2|IP_AHA-S-1|IP_AHA-CO-2|IP_AHA-CO-1|IP_AHA-C-3|IP_AHA-C-2|IP_AHA-C-1	0|4|5|0|10|0|0	19	7	0.38	0.00|0.83|0.72|0.00|1.00|0.00|0.00	2	0.3643	1	0.4789
MRC1	TTHERM_00856430	IP_MRC1-S-3|IP_MRC1-S-2|IP_MRC1-S-1|IP_MRC1-CO-2|IP_MRC1-CO-1|IP_MRC1-C-1	2|1|1|0|2|0	6	6	0.39	0.66|0.39|0.51|0.00|0.72|0.00	0	0.3817	0.7225	0.482
MTB	TTHERM_00049060	IP_BHA-CO-2|IP_BHA-CO-1	0|10	10	2	0.49	0.00|1.00	0	0.4975	0.995	0.4848
MTB	TTHERM_00989460	IP_BHA-CO-2|IP_BHA-CO-1	0|6	6	2	0.5	0.00|1.00	0	0.4975	0.995	0.4848
MTB	TTHERM_01044640	IP_BHA-CO-2|IP_BHA-CO-1	0|6	6	2	0.48	0.00|1.00	0	0.4975	0.995	0.4848
MTB	TTHERM_00497940	IP_BHA-CO-2|IP_BHA-CO-1	0|16	16	2	0.48	0.00|1.00	4	0.4975	0.995	0.4848
MTB	TTHERM_00140980	IP_BHA-CO-2|IP_BHA-CO-1	0|12	12	2	0.52	0.00|1.00	0	0.4975	0.995	0.4848
MTB	TTHERM_00444510	IP_BHA-CO-2|IP_BHA-CO-1	0|20	20	2	0.54	0.00|1.00	7	0.4975	0.995	0.4848
MTB	TTHERM_00325580	IP_BHA-CO-2|IP_BHA-CO-1	0|14	14	2	0.49	0.00|1.00	0	0.4975	0.995	0.4848
MTB	TTHERM_00704010	IP_BHA-CO-2|IP_BHA-CO-1	0|9	9	2	0.48	0.00|1.00	0	0.4975	0.995	0.4848
MTB	TTHERM_00853090	IP_BHA-CO-2|IP_BHA-CO-1	0|8	8	2	0.47	0.00|1.00	0	0.4975	0.995	0.4848
MTB	TTHERM_001207659	IP_BHA-CO-2|IP_BHA-CO-1	0|12	12	2	0.46	0.00|1.00	3	0.4975	0.995	0.4848
MTB	TTHERM_00106969	IP_BHA-CO-2|IP_BHA-CO-1	0|9	9	2	0.47	0.00|1.00	0	0.4975	0.995	0.4848
MTB	TTHERM_000931898	IP_BHA-CO-2|IP_BHA-CO-1	0|5	5	2	0.51	0.00|1.00	0	0.4975	0.995	0.4848
MTB	TTHERM_00010970	IP_BHA-CO-2|IP_BHA-CO-1	0|9	9	2	0.5	0.00|1.00	0	0.4975	0.995	0.4848
MTB	TTHERM_00637600	IP_BHA-CO-2|IP_BHA-CO-1	0|8	8	2	0.5	0.00|1.00	0	0.4975	0.995	0.4848
MTB	TTHERM_00220590	IP_BHA-CO-2|IP_BHA-CO-1	0|6	6	2	0.52	0.00|1.00	0	0.4975	0.995	0.4848
MTA	TTHERM_00339880	IP_AHA-S-2|IP_AHA-S-1|IP_AHA-CO-2|IP_AHA-CO-1|IP_AHA-C-3|IP_AHA-C-2|IP_AHA-C-1	1|0|1|0|2|1|0	5	7	0.38	0.67|0.00|0.42|0.00|0.81|0.57|0.00	0	0.3532	0.815	0.4862
MRC1	TTHERM_00243800	IP_MRC1-S-3|IP_MRC1-S-2|IP_MRC1-S-1|IP_MRC1-CO-2|IP_MRC1-CO-1|IP_MRC1-C-1	0|3|0|0|3|1	7	6	0.36	0.00|0.89|0.00|0.00|0.85|0.49	0	0.3729	0.89	0.487
MTB	TTHERM_00317230	IP_BHA-CO-2|IP_BHA-CO-1	0|8	8	2	0.49	0.00|0.99	0	0.4963	0.9925	0.4891
MTB	TTHERM_00079300	IP_BHA-CO-2|IP_BHA-CO-1	0|18	18	2	0.52	0.00|0.99	7	0.4963	0.9925	0.4891
MTB	TTHERM_00488350	IP_BHA-CO-2|IP_BHA-CO-1	0|9	9	2	0.46	0.00|0.99	2	0.4963	0.9925	0.4891
MTB	TTHERM_00047280	IP_BHA-CO-2|IP_BHA-CO-1	0|10	10	2	0.5	0.00|0.99	2	0.4963	0.9925	0.4891
MTB	TTHERM_00016270	IP_BHA-CO-2|IP_BHA-CO-1	0|7	7	2	0.49	0.00|0.99	0	0.4963	0.9925	0.4891
MTB	TTHERM_00522240	IP_BHA-CO-2|IP_BHA-CO-1	0|12	12	2	0.55	0.00|0.99	3	0.4963	0.9925	0.4891
MTB	TTHERM_001113129	IP_BHA-CO-2|IP_BHA-CO-1	0|9	9	2	0.49	0.00|0.99	0	0.4963	0.9925	0.4891
MTB	TTHERM_00391300	IP_BHA-CO-2|IP_BHA-CO-1	0|5	5	2	0.49	0.00|0.99	0	0.4963	0.9925	0.4891
MTB	TTHERM_00444330	IP_BHA-CO-2|IP_BHA-CO-1	0|7	7	2	0.5	0.00|0.99	0	0.4963	0.9925	0.4891
MRC1	TTHERM_00926960	IP_MRC1-S-3|IP_MRC1-S-2|IP_MRC1-S-1|IP_MRC1-CO-2|IP_MRC1-CO-1|IP_MRC1-C-1	0|1|1|1|0|2	5	6	0.35	0.00|0.43|0.49|0.55|0.00|0.75	0	0.37	0.7525	0.4918
MTB	TTHERM_00502250	IP_BHA-CO-2|IP_BHA-CO-1	0|6	6	2	0.45	0.00|0.99	0	0.495	0.99	0.4925
MTB	TTHERM_00527090	IP_BHA-CO-2|IP_BHA-CO-1	0|6	6	2	0.48	0.00|0.99	0	0.495	0.99	0.4925
MTB	TTHERM_00657230	IP_BHA-CO-2|IP_BHA-CO-1	0|5	5	2	0.5	0.00|0.99	0	0.495	0.99	0.4925
MTB	TTHERM_01119470	IP_BHA-CO-2|IP_BHA-CO-1	0|7	7	2	0.51	0.00|0.99	0	0.495	0.99	0.4925
MTB	TTHERM_01345820	IP_BHA-CO-2|IP_BHA-CO-1	0|7	7	2	0.48	0.00|0.99	0	0.495	0.99	0.4925
MTB	TTHERM_00837950	IP_BHA-CO-2|IP_BHA-CO-1	0|16	16	2	0.52	0.00|0.99	0	0.495	0.99	0.4925
MTB	TTHERM_00419850	IP_BHA-CO-2|IP_BHA-CO-1	0|9	9	2	0.49	0.00|0.99	0	0.495	0.99	0.4925
MTB	TTHERM_01034460	IP_BHA-CO-2|IP_BHA-CO-1	0|6	6	2	0.52	0.00|0.99	0	0.495	0.99	0.4925
MTB	TTHERM_00219300	IP_BHA-CO-2|IP_BHA-CO-1	0|9	9	2	0.51	0.00|0.99	0	0.495	0.99	0.4925
MTB	TTHERM_00046250	IP_BHA-CO-2|IP_BHA-CO-1	0|7	7	2	0.49	0.00|0.99	0	0.495	0.99	0.4925
MTB	TTHERM_00102830	IP_BHA-CO-2|IP_BHA-CO-1	0|25	25	2	0.51	0.00|0.99	10	0.495	0.99	0.4925
MTA	TTHERM_00637400	IP_AHA-S-2|IP_AHA-S-1|IP_AHA-CO-2|IP_AHA-CO-1|IP_AHA-C-3|IP_AHA-C-2|IP_AHA-C-1	1|0|11|0|0|2|0	14	7	0.36	0.64|0.00|0.98|0.00|0.00|0.82|0.00	0	0.3493	0.9825	0.4931
MTB	TTHERM_01050580	IP_BHA-CO-2|IP_BHA-CO-1	0|5	5	2	0.5	0.00|0.99	0	0.4937	0.9875	0.4935
MTB	TTHERM_00497450	IP_BHA-CO-2|IP_BHA-CO-1	0|6	6	2	0.49	0.00|0.99	0	0.4937	0.9875	0.4935
MTB	TTHERM_00633150	IP_BHA-CO-2|IP_BHA-CO-1	0|8	8	2	0.47	0.00|0.99	2	0.4937	0.9875	0.4935
MTB	TTHERM_00614680	IP_BHA-CO-2|IP_BHA-CO-1	0|12	12	2	0.46	0.00|0.99	0	0.4937	0.9875	0.4935
MTB	TTHERM_00476510	IP_BHA-CO-2|IP_BHA-CO-1	0|4	4	2	0.48	0.00|0.98	0	0.4925	0.985	0.4944
MTB	TTHERM_00300410	IP_BHA-CO-2|IP_BHA-CO-1	0|4	4	2	0.48	0.00|0.98	0	0.4925	0.985	0.4944
MTB	TTHERM_00347990	IP_BHA-CO-2|IP_BHA-CO-1	0|6	6	2	0.51	0.00|0.98	0	0.4925	0.985	0.4944
MTB	TTHERM_00772060	IP_BHA-CO-2|IP_BHA-CO-1	0|7	7	2	0.55	0.00|0.98	0	0.4925	0.985	0.4944
MTB	TTHERM_00285560	IP_BHA-CO-2|IP_BHA-CO-1	0|4	4	2	0.48	0.00|0.98	0	0.4912	0.9825	0.4954
MTB	TTHERM_00997520	IP_BHA-CO-2|IP_BHA-CO-1	0|4	4	2	0.47	0.00|0.98	0	0.4912	0.9825	0.4954
MTB	TTHERM_00421000	IP_BHA-CO-2|IP_BHA-CO-1	0|7	7	2	0.5	0.00|0.98	2	0.4912	0.9825	0.4954
MTB	TTHERM_00313610	IP_BHA-CO-2|IP_BHA-CO-1	0|4	4	2	0.53	0.00|0.98	0	0.4912	0.9825	0.4954
MTB	TTHERM_00149980	IP_BHA-CO-2|IP_BHA-CO-1	0|4	4	2	0.52	0.00|0.98	0	0.49	0.98	0.496
MTB	TTHERM_00142330	IP_BHA-CO-2|IP_BHA-CO-1	0|8	8	2	0.53	0.00|0.98	0	0.49	0.98	0.496
MTB	TTHERM_00404240	IP_BHA-CO-2|IP_BHA-CO-1	0|4	4	2	0.5	0.00|0.98	0	0.49	0.98	0.496
MRC1	TTHERM_00237560	IP_MRC1-S-3|IP_MRC1-S-2|IP_MRC1-S-1|IP_MRC1-CO-2|IP_MRC1-CO-1|IP_MRC1-C-1	0|0|1|5|0|12	18	6	0.38	0.00|0.00|0.39|0.88|0.00|0.93	0	0.3687	0.9325	0.4963
MTB	TTHERM_00535550	IP_BHA-CO-2|IP_BHA-CO-1	0|4	4	2	0.48	0.00|0.98	0	0.4887	0.9775	0.4971
MTB	TTHERM_00074300	IP_BHA-CO-2|IP_BHA-CO-1	0|5	5	2	0.49	0.00|0.98	0	0.4887	0.9775	0.4971
MTB	TTHERM_000585349	IP_BHA-CO-2|IP_BHA-CO-1	0|5	5	2	0.46	0.00|0.98	0	0.4887	0.9775	0.4971
MTB	TTHERM_00577240	IP_BHA-CO-2|IP_BHA-CO-1	0|38	38	2	0.51	0.00|0.98	17	0.4887	0.9775	0.4971
MTB	TTHERM_00157810	IP_BHA-CO-2|IP_BHA-CO-1	0|4	4	2	0.49	0.00|0.98	0	0.4887	0.9775	0.4971
MTB	TTHERM_00365340	IP_BHA-CO-2|IP_BHA-CO-1	0|38	38	2	0.53	0.00|0.97	17	0.4875	0.975	0.4977
MTB	TTHERM_01080490	IP_BHA-CO-2|IP_BHA-CO-1	0|8	8	2	0.53	0.00|0.97	3	0.4875	0.975	0.4977
MTB	TTHERM_00408950	IP_BHA-CO-2|IP_BHA-CO-1	0|5	5	2	0.44	0.00|0.97	0	0.4875	0.975	0.4977
MTB	TTHERM_00402120	IP_BHA-CO-2|IP_BHA-CO-1	0|9	9	2	0.51	0.00|0.97	3	0.4862	0.9725	0.4989
MTB	TTHERM_00649100	IP_BHA-CO-2|IP_BHA-CO-1	0|5	5	2	0.48	0.00|0.97	0	0.4862	0.9725	0.4989
MTB	TTHERM_001035761	IP_BHA-CO-2|IP_BHA-CO-1	0|4	4	2	0.49	0.00|0.97	0	0.4862	0.9725	0.4989
MTB	TTHERM_00146220	IP_BHA-CO-2|IP_BHA-CO-1	0|9	9	2	0.49	0.00|0.97	3	0.4862	0.9725	0.4989
MTB	TTHERM_00997610	IP_BHA-CO-2|IP_BHA-CO-1	0|4	4	2	0.47	0.00|0.97	0	0.4862	0.9725	0.4989
MTB	TTHERM_00624740	IP_BHA-CO-2|IP_BHA-CO-1	0|4	4	2	0.5	0.00|0.97	0	0.4862	0.9725	0.4989
MTA	TTHERM_00877020	IP_AHA-S-2|IP_AHA-S-1|IP_AHA-CO-2|IP_AHA-CO-1|IP_AHA-C-3|IP_AHA-C-2|IP_AHA-C-1	0|1|1|0|1|2|0	5	7	0.36	0.00|0.61|0.45|0.00|0.57|0.81|0.00	0	0.3489	0.8125	0.4994
MRC1	TTHERM_01369760	IP_MRC1-S-3|IP_MRC1-S-2|IP_MRC1-S-1|IP_MRC1-CO-2|IP_MRC1-CO-1|IP_MRC1-C-1	0|4|1|0|0|2	7	6	0.37	0.00|0.89|0.51|0.00|0.00|0.79	0	0.3658	0.895	0.5006
MTB	TTHERM_00725990	IP_BHA-CO-2|IP_BHA-CO-1	0|4	4	2	0.49	0.00|0.97	0	0.485	0.97	0.5007
MTB	TTHERM_00584860	IP_BHA-CO-2|IP_BHA-CO-1	0|4	4	2	0.46	0.00|0.97	0	0.485	0.97	0.5007
MTB	TTHERM_00636860	IP_BHA-CO-2|IP_BHA-CO-1	0|4	4	2	0.51	0.00|0.97	0	0.485	0.97	0.5007
MTB	TTHERM_00317200	IP_BHA-CO-2|IP_BHA-CO-1	0|4	4	2	0.5	0.00|0.97	0	0.485	0.97	0.5007
MTB	TTHERM_01043060	IP_BHA-CO-2|IP_BHA-CO-1	0|3	3	2	0.5	0.00|0.97	0	0.485	0.97	0.5007
MTB	TTHERM_00085100	IP_BHA-CO-2|IP_BHA-CO-1	0|4	4	2	0.49	0.00|0.97	0	0.485	0.97	0.5007
MTB	TTHERM_00318820	IP_BHA-CO-2|IP_BHA-CO-1	0|4	4	2	0.48	0.00|0.97	0	0.485	0.97	0.5007
MTB	TTHERM_00585230	IP_BHA-CO-2|IP_BHA-CO-1	0|4	4	2	0.49	0.00|0.97	0	0.485	0.97	0.5007
MTB	TTHERM_00588910	IP_BHA-CO-2|IP_BHA-CO-1	0|4	4	2	0.5	0.00|0.97	0	0.485	0.97	0.5007
MTB	TTHERM_01308050	IP_BHA-CO-2|IP_BHA-CO-1	0|16	16	2	0.55	0.00|0.97	7	0.485	0.97	0.5007
MTB	TTHERM_00046740	IP_BHA-CO-2|IP_BHA-CO-1	0|5	5	2	0.45	0.00|0.97	0	0.4837	0.9675	0.5014
MTB	TTHERM_00628610	IP_BHA-CO-2|IP_BHA-CO-1	0|4	4	2	0.47	0.00|0.97	0	0.4837	0.9675	0.5014
MTB	TTHERM_00464990	IP_BHA-CO-2|IP_BHA-CO-1	0|7	7	2	0.48	0.00|0.97	2	0.4837	0.9675	0.5014
MTB	TTHERM_00377250	IP_BHA-CO-2|IP_BHA-CO-1	0|4	4	2	0.46	0.00|0.97	0	0.4837	0.9675	0.5014
MTB	TTHERM_00624730	IP_BHA-CO-2|IP_BHA-CO-1	0|7	7	2	0.49	0.00|0.96	2	0.4825	0.965	0.5019
MTB	TTHERM_00144840	IP_BHA-CO-2|IP_BHA-CO-1	0|5	5	2	0.45	0.00|0.96	0	0.4825	0.965	0.5019
MTB	TTHERM_00136240	IP_BHA-CO-2|IP_BHA-CO-1	0|7	7	2	0.47	0.00|0.96	2	0.4825	0.965	0.5019
MTB	TTHERM_001044376	IP_BHA-CO-2|IP_BHA-CO-1	0|4	4	2	0.54	0.00|0.96	0	0.4812	0.9625	0.5032
MTB	TTHERM_01054220	IP_BHA-CO-2|IP_BHA-CO-1	0|4	4	2	0.45	0.00|0.96	0	0.4812	0.9625	0.5032
MTB	TTHERM_00313090	IP_BHA-CO-2|IP_BHA-CO-1	0|3	3	2	0.47	0.00|0.96	0	0.4812	0.9625	0.5032
MTB	TTHERM_01093500	IP_BHA-CO-2|IP_BHA-CO-1	0|4	4	2	0.48	0.00|0.96	0	0.4812	0.9625	0.5032
MTB	TTHERM_00941450	IP_BHA-CO-2|IP_BHA-CO-1	0|4	4	2	0.45	0.00|0.96	0	0.4812	0.9625	0.5032
MTB	TTHERM_00497920	IP_BHA-CO-2|IP_BHA-CO-1	0|4	4	2	0.49	0.00|0.96	0	0.4812	0.9625	0.5032
MTB	TTHERM_01262890	IP_BHA-CO-2|IP_BHA-CO-1	0|3	3	2	0.55	0.00|0.96	0	0.4812	0.9625	0.5032
MTB	TTHERM_00975380	IP_BHA-CO-2|IP_BHA-CO-1	0|4	4	2	0.47	0.00|0.96	0	0.4812	0.9625	0.5032
MTB	TTHERM_01104920	IP_BHA-CO-2|IP_BHA-CO-1	0|3	3	2	0.54	0.00|0.96	0	0.48	0.96	0.5035
MTB	TTHERM_00112770	IP_BHA-CO-2|IP_BHA-CO-1	0|3	3	2	0.48	0.00|0.96	0	0.48	0.96	0.5035
MTB	TTHERM_00149290	IP_BHA-CO-2|IP_BHA-CO-1	0|3	3	2	0.43	0.00|0.96	0	0.4787	0.9575	0.504
MTB	TTHERM_00238830	IP_BHA-CO-2|IP_BHA-CO-1	0|4	4	2	0.49	0.00|0.96	0	0.4787	0.9575	0.504
MTB	TTHERM_00052130	IP_BHA-CO-2|IP_BHA-CO-1	0|3	3	2	0.46	0.00|0.96	0	0.4787	0.9575	0.504
MTB	TTHERM_00194270	IP_BHA-CO-2|IP_BHA-CO-1	0|4	4	2	0.49	0.00|0.95	0	0.4775	0.955	0.5043
MTB	TTHERM_00266390	IP_BHA-CO-2|IP_BHA-CO-1	0|17	17	2	0.5	0.00|0.95	7	0.4775	0.955	0.5043
MTB	TTHERM_00095500	IP_BHA-CO-2|IP_BHA-CO-1	0|4	4	2	0.44	0.00|0.95	0	0.4762	0.9525	0.5046
MTB	TTHERM_00160750	IP_BHA-CO-2|IP_BHA-CO-1	0|4	4	2	0.45	0.00|0.95	0	0.4762	0.9525	0.5046
MRC1	TTHERM_00497920	IP_MRC1-S-3|IP_MRC1-S-2|IP_MRC1-S-1|IP_MRC1-CO-2|IP_MRC1-CO-1|IP_MRC1-C-1	0|0|0|2|4|1	7	6	0.42	0.00|0.00|0.00|0.74|0.84|0.56	0	0.3567	0.8375	0.5049
MTA	TTHERM_00697370	IP_AHA-S-2|IP_AHA-S-1|IP_AHA-CO-2|IP_AHA-CO-1|IP_AHA-C-3|IP_AHA-C-2|IP_AHA-C-1	1|0|5|0|0|2|0	8	7	0.33	0.68|0.00|0.93|0.00|0.00|0.81|0.00	0	0.3461	0.9275	0.5054
MTB	TTHERM_000476709	IP_BHA-CO-2|IP_BHA-CO-1	0|3	3	2	0.53	0.00|0.95	0	0.475	0.95	0.5058
MTB	TTHERM_00105580	IP_BHA-CO-2|IP_BHA-CO-1	0|4	4	2	0.47	0.00|0.95	0	0.475	0.95	0.5058
MTB	TTHERM_00600480	IP_BHA-CO-2|IP_BHA-CO-1	0|3	3	2	0.52	0.00|0.95	0	0.475	0.95	0.5058
MTB	TTHERM_00354710	IP_BHA-CO-2|IP_BHA-CO-1	0|3	3	2	0.5	0.00|0.95	0	0.475	0.95	0.5058
MTB	TTHERM_00589960	IP_BHA-CO-2|IP_BHA-CO-1	0|3	3	2	0.45	0.00|0.95	0	0.475	0.95	0.5058
MTB	TTHERM_00304359	IP_BHA-CO-2|IP_BHA-CO-1	0|3	3	2	0.49	0.00|0.95	0	0.475	0.95	0.5058
MTB	TTHERM_00095540	IP_BHA-CO-2|IP_BHA-CO-1	0|3	3	2	0.45	0.00|0.95	0	0.475	0.95	0.5058
MTB	TTHERM_01289110	IP_BHA-CO-2|IP_BHA-CO-1	0|21	21	2	0.47	0.00|0.95	9	0.4737	0.9475	0.5065
MTB	TTHERM_00684450	IP_BHA-CO-2|IP_BHA-CO-1	0|3	3	2	0.44	0.00|0.95	0	0.4737	0.9475	0.5065
MTB	TTHERM_00263380	IP_BHA-CO-2|IP_BHA-CO-1	0|3	3	2	0.53	0.00|0.95	0	0.4737	0.9475	0.5065
MTB	TTHERM_00332200	IP_BHA-CO-2|IP_BHA-CO-1	0|3	3	2	0.47	0.00|0.95	0	0.4737	0.9475	0.5065
MTB	TTHERM_01253340	IP_BHA-CO-2|IP_BHA-CO-1	0|3	3	2	0.44	0.00|0.94	0	0.4725	0.945	0.507
MTB	TTHERM_00058880	IP_BHA-CO-2|IP_BHA-CO-1	0|3	3	2	0.49	0.00|0.94	0	0.4725	0.945	0.507
MTB	TTHERM_00670500	IP_BHA-CO-2|IP_BHA-CO-1	0|4	4	2	0.47	0.00|0.94	0	0.4725	0.945	0.507
MTB	TTHERM_00825080	IP_BHA-CO-2|IP_BHA-CO-1	0|3	3	2	0.48	0.00|0.94	0	0.4712	0.9425	0.5076
MTB	TTHERM_00522650	IP_BHA-CO-2|IP_BHA-CO-1	0|4	4	2	0.45	0.00|0.94	0	0.4712	0.9425	0.5076
MTB	TTHERM_00378430	IP_BHA-CO-2|IP_BHA-CO-1	0|3	3	2	0.52	0.00|0.94	0	0.4712	0.9425	0.5076
MTB	TTHERM_00329800	IP_BHA-CO-2|IP_BHA-CO-1	0|3	3	2	0.46	0.00|0.94	0	0.4712	0.9425	0.5076
MTB	TTHERM_00028780	IP_BHA-CO-2|IP_BHA-CO-1	0|3	3	2	0.44	0.00|0.94	0	0.47	0.94	0.5087
MTB	TTHERM_01299660	IP_BHA-CO-2|IP_BHA-CO-1	0|7	7	2	0.45	0.00|0.94	3	0.47	0.94	0.5087
MTB	TTHERM_00421020	IP_BHA-CO-2|IP_BHA-CO-1	0|4	4	2	0.47	0.00|0.94	0	0.47	0.94	0.5087
MTB	TTHERM_00823400	IP_BHA-CO-2|IP_BHA-CO-1	0|2	2	2	0.43	0.00|0.94	0	0.47	0.94	0.5087
MTB	TTHERM_00193849	IP_BHA-CO-2|IP_BHA-CO-1	0|3	3	2	0.45	0.00|0.94	0	0.47	0.94	0.5087
MTB	TTHERM_00266400	IP_BHA-CO-2|IP_BHA-CO-1	0|3	3	2	0.45	0.00|0.94	0	0.47	0.94	0.5087
MTB	TTHERM_00037050	IP_BHA-CO-2|IP_BHA-CO-1	0|9	9	2	0.48	0.00|0.94	4	0.47	0.94	0.5087
MTB	TTHERM_01318430	IP_BHA-CO-2|IP_BHA-CO-1	0|4	4	2	0.44	0.00|0.94	0	0.4688	0.9375	0.5089
MRC1	TTHERM_00705050	IP_MRC1-S-3|IP_MRC1-S-2|IP_MRC1-S-1|IP_MRC1-CO-2|IP_MRC1-CO-1|IP_MRC1-C-1	0|2|1|0|3|0	6	6	0.33	0.00|0.76|0.48|0.00|0.85|0.00	0	0.3504	0.855	0.5091
MTB	TTHERM_00316160	IP_BHA-CO-2|IP_BHA-CO-1	0|3	3	2	0.47	0.00|0.94	0	0.4675	0.935	0.5097
MTB	TTHERM_000343609	IP_BHA-CO-2|IP_BHA-CO-1	0|3	3	2	0.47	0.00|0.94	0	0.4675	0.935	0.5097
MTB	TTHERM_00697430	IP_BHA-CO-2|IP_BHA-CO-1	0|3	3	2	0.49	0.00|0.94	0	0.4675	0.935	0.5097
MTB	TTHERM_000245499	IP_BHA-CO-2|IP_BHA-CO-1	0|3	3	2	0.48	0.00|0.94	0	0.4675	0.935	0.5097
MTB	TTHERM_00237560	IP_BHA-CO-2|IP_BHA-CO-1	0|3	3	2	0.47	0.00|0.94	0	0.4675	0.935	0.5097
MTB	TTHERM_00028580	IP_BHA-CO-2|IP_BHA-CO-1	0|3	3	2	0.46	0.00|0.93	0	0.4663	0.9325	0.5102
MTB	TTHERM_00390040	IP_BHA-CO-2|IP_BHA-CO-1	0|3	3	2	0.5	0.00|0.93	0	0.4663	0.9325	0.5102
MTB	TTHERM_00188929	IP_BHA-CO-2|IP_BHA-CO-1	0|3	3	2	0.52	0.00|0.93	0	0.4663	0.9325	0.5102
MTB	TTHERM_00069400	IP_BHA-CO-2|IP_BHA-CO-1	0|3	3	2	0.5	0.00|0.93	0	0.465	0.93	0.5107
MTB	TTHERM_00073200	IP_BHA-CO-2|IP_BHA-CO-1	0|6	6	2	0.49	0.00|0.93	2	0.465	0.93	0.5107
MTB	TTHERM_00653940	IP_BHA-CO-2|IP_BHA-CO-1	0|3	3	2	0.47	0.00|0.93	0	0.465	0.93	0.5107
MTA	TTHERM_00705050	IP_AHA-S-2|IP_AHA-S-1|IP_AHA-CO-2|IP_AHA-CO-1|IP_AHA-C-3|IP_AHA-C-2|IP_AHA-C-1	0|1|12|0|0|2|0	15	7	0.38	0.00|0.59|0.97|0.00|0.00|0.82|0.00	0	0.3404	0.97	0.5111
MTB	TTHERM_00155330	IP_BHA-CO-2|IP_BHA-CO-1	0|3	3	2	0.48	0.00|0.93	0	0.4637	0.9275	0.5115
MTB	TTHERM_01212860	IP_BHA-CO-2|IP_BHA-CO-1	0|3	3	2	0.44	0.00|0.93	0	0.4637	0.9275	0.5115
MTB	TTHERM_00388370	IP_BHA-CO-2|IP_BHA-CO-1	0|3	3	2	0.48	0.00|0.93	0	0.4637	0.9275	0.5115
MTB	TTHERM_00471150	IP_BHA-CO-2|IP_BHA-CO-1	0|3	3	2	0.47	0.00|0.93	0	0.4637	0.9275	0.5115
MTB	TTHERM_00455100	IP_BHA-CO-2|IP_BHA-CO-1	0|3	3	2	0.47	0.00|0.93	0	0.4637	0.9275	0.5115
MTB	TTHERM_00557840	IP_BHA-CO-2|IP_BHA-CO-1	0|3	3	2	0.46	0.00|0.92	0	0.4625	0.925	0.512
MTB	TTHERM_00621160	IP_BHA-CO-2|IP_BHA-CO-1	0|3	3	2	0.45	0.00|0.92	0	0.4625	0.925	0.512
MTB	TTHERM_00196350	IP_BHA-CO-2|IP_BHA-CO-1	0|3	3	2	0.44	0.00|0.92	0	0.4625	0.925	0.512
MTB	TTHERM_00716190	IP_BHA-CO-2|IP_BHA-CO-1	0|3	3	2	0.48	0.00|0.92	0	0.4612	0.9225	0.5122
MTB	TTHERM_01126400	IP_BHA-CO-2|IP_BHA-CO-1	0|3	3	2	0.44	0.00|0.92	0	0.46	0.92	0.5123
MTB	TTHERM_01020680	IP_BHA-CO-2|IP_BHA-CO-1	0|3	3	2	0.45	0.00|0.92	0	0.4587	0.9175	0.5129
MTB	TTHERM_00101150	IP_BHA-CO-2|IP_BHA-CO-1	0|3	3	2	0.42	0.00|0.92	0	0.4587	0.9175	0.5129
MTB	TTHERM_000148715	IP_BHA-CO-2|IP_BHA-CO-1	0|3	3	2	0.45	0.00|0.92	0	0.4587	0.9175	0.5129
MTB	TTHERM_00384860	IP_BHA-CO-2|IP_BHA-CO-1	0|3	3	2	0.42	0.00|0.91	0	0.4575	0.915	0.5131
MTB	TTHERM_00655560	IP_BHA-CO-2|IP_BHA-CO-1	0|3	3	2	0.47	0.00|0.91	0	0.4562	0.9125	0.5132
MRC1	TTHERM_00589960	IP_MRC1-S-3|IP_MRC1-S-2|IP_MRC1-S-1|IP_MRC1-CO-2|IP_MRC1-CO-1|IP_MRC1-C-1	0|1|0|3|4|0	8	6	0.32	0.00|0.36|0.00|0.84|0.89|0.00	0	0.3496	0.8925	0.5132
MTB	TTHERM_00686170	IP_BHA-CO-2|IP_BHA-CO-1	0|3	3	2	0.44	0.00|0.91	0	0.455	0.91	0.5138
MTB	TTHERM_00284030	IP_BHA-CO-2|IP_BHA-CO-1	0|9	9	2	0.47	0.00|0.91	4	0.455	0.91	0.5138
MTB	TTHERM_00896100	IP_BHA-CO-2|IP_BHA-CO-1	0|2	2	2	0.46	0.00|0.91	0	0.455	0.91	0.5138
MTB	TTHERM_00616340	IP_BHA-CO-2|IP_BHA-CO-1	0|2	2	2	0.45	0.00|0.91	0	0.4537	0.9075	0.514
MTB	TTHERM_00760800	IP_BHA-CO-2|IP_BHA-CO-1	0|2	2	2	0.44	0.00|0.90	0	0.4525	0.905	0.5142
MTB	TTHERM_01394370	IP_BHA-CO-2|IP_BHA-CO-1	0|3	3	2	0.45	0.00|0.90	0	0.4512	0.9025	0.5148
MTB	TTHERM_00194710	IP_BHA-CO-2|IP_BHA-CO-1	0|2	2	2	0.44	0.00|0.90	0	0.4512	0.9025	0.5148
MTB	TTHERM_00056000	IP_BHA-CO-2|IP_BHA-CO-1	0|3	3	2	0.47	0.00|0.90	0	0.4512	0.9025	0.5148
MTB	TTHERM_00698630	IP_BHA-CO-2|IP_BHA-CO-1	0|2	2	2	0.44	0.00|0.90	0	0.4487	0.8975	0.5154
MTB	TTHERM_00616380	IP_BHA-CO-2|IP_BHA-CO-1	0|3	3	2	0.44	0.00|0.90	0	0.4487	0.8975	0.5154
MTB	TTHERM_00158000	IP_BHA-CO-2|IP_BHA-CO-1	0|2	2	2	0.42	0.00|0.90	0	0.4487	0.8975	0.5154
MTB	TTHERM_000131239	IP_BHA-CO-2|IP_BHA-CO-1	0|2	2	2	0.43	0.00|0.89	0	0.4475	0.895	0.5156
MTB	TTHERM_00427590	IP_BHA-CO-2|IP_BHA-CO-1	0|3	3	2	0.45	0.00|0.89	0	0.4462	0.8925	0.5158
MTB	TTHERM_00805850	IP_BHA-CO-2|IP_BHA-CO-1	0|2	2	2	0.45	0.00|0.89	0	0.445	0.89	0.516
MTA	TTHERM_01097950	IP_AHA-S-2|IP_AHA-S-1|IP_AHA-CO-2|IP_AHA-CO-1|IP_AHA-C-3|IP_AHA-C-2|IP_AHA-C-1	1|0|2|0|0|3|0	6	7	0.32	0.68|0.00|0.78|0.00|0.00|0.91|0.00	0	0.3389	0.915	0.5164
MTB	TTHERM_000058769	IP_BHA-CO-2|IP_BHA-CO-1	0|2	2	2	0.42	0.00|0.89	0	0.4437	0.8875	0.5165
MTB	TTHERM_00293370	IP_BHA-CO-2|IP_BHA-CO-1	0|2	2	2	0.45	0.00|0.89	0	0.4437	0.8875	0.5165
MTB	TTHERM_00721630	IP_BHA-CO-2|IP_BHA-CO-1	0|2	2	2	0.41	0.00|0.88	0	0.4425	0.885	0.5169
MTB	TTHERM_00149900	IP_BHA-CO-2|IP_BHA-CO-1	0|2	2	2	0.44	0.00|0.88	0	0.4425	0.885	0.5169
MRC1	TTHERM_00538790	IP_MRC1-S-3|IP_MRC1-S-2|IP_MRC1-S-1|IP_MRC1-CO-2|IP_MRC1-CO-1|IP_MRC1-C-1	0|3|0|0|2|1	6	6	0.35	0.00|0.84|0.00|0.00|0.72|0.51	0	0.3454	0.84	0.5171
MTB	TTHERM_01013180	IP_BHA-CO-2|IP_BHA-CO-1	0|2	2	2	0.41	0.00|0.88	0	0.4412	0.8825	0.5178
MTB	TTHERM_01035500	IP_BHA-CO-2|IP_BHA-CO-1	0|2	2	2	0.43	0.00|0.88	0	0.4412	0.8825	0.5178
MTB	TTHERM_00023920	IP_BHA-CO-2|IP_BHA-CO-1	0|2	2	2	0.41	0.00|0.88	0	0.4412	0.8825	0.5178
MTB	TTHERM_00343870	IP_BHA-CO-2|IP_BHA-CO-1	0|2	2	2	0.44	0.00|0.88	0	0.4412	0.8825	0.5178
MTB	TTHERM_00939140	IP_BHA-CO-2|IP_BHA-CO-1	0|2	2	2	0.42	0.00|0.88	0	0.44	0.88	0.518
MTB	TTHERM_00357080	IP_BHA-CO-2|IP_BHA-CO-1	0|2	2	2	0.43	0.00|0.88	0	0.4387	0.8775	0.5189
MTB	TTHERM_00149110	IP_BHA-CO-2|IP_BHA-CO-1	0|2	2	2	0.42	0.00|0.88	0	0.4387	0.8775	0.5189
MTB	TTHERM_00158380	IP_BHA-CO-2|IP_BHA-CO-1	0|2	2	2	0.42	0.00|0.88	0	0.4387	0.8775	0.5189
MTB	TTHERM_00534010	IP_BHA-CO-2|IP_BHA-CO-1	0|2	2	2	0.44	0.00|0.88	0	0.4387	0.8775	0.5189
MTB	TTHERM_00825210	IP_BHA-CO-2|IP_BHA-CO-1	0|2	2	2	0.41	0.00|0.88	0	0.4375	0.875	0.5196
MTB	TTHERM_00582140	IP_BHA-CO-2|IP_BHA-CO-1	0|2	2	2	0.41	0.00|0.88	0	0.4375	0.875	0.5196
MTB	TTHERM_000011369	IP_BHA-CO-2|IP_BHA-CO-1	0|2	2	2	0.44	0.00|0.88	0	0.4375	0.875	0.5196
MRC1	TTHERM_00444330	IP_MRC1-S-3|IP_MRC1-S-2|IP_MRC1-S-1|IP_MRC1-CO-2|IP_MRC1-CO-1|IP_MRC1-C-1	0|2|0|0|3|1	6	6	0.33	0.00|0.71|0.00|0.00|0.77|0.57	0	0.3425	0.7725	0.5209
MTB	TTHERM_00101180	IP_BHA-CO-2|IP_BHA-CO-1	0|2	2	2	0.43	0.00|0.87	0	0.4363	0.8725	0.5213
MTB	TTHERM_00106890	IP_BHA-CO-2|IP_BHA-CO-1	0|21	21	2	0.47	0.00|0.87	9	0.4363	0.8725	0.5213
MTB	TTHERM_01245640	IP_BHA-CO-2|IP_BHA-CO-1	0|2	2	2	0.46	0.00|0.87	0	0.4363	0.8725	0.5213
MTB	TTHERM_00522940	IP_BHA-CO-2|IP_BHA-CO-1	0|2	2	2	0.43	0.00|0.87	0	0.4363	0.8725	0.5213
MTB	TTHERM_00161420	IP_BHA-CO-2|IP_BHA-CO-1	0|2	2	2	0.44	0.00|0.87	0	0.4363	0.8725	0.5213
MTB	TTHERM_000160999	IP_BHA-CO-2|IP_BHA-CO-1	0|2	2	2	0.43	0.00|0.87	0	0.4363	0.8725	0.5213
MTB	TTHERM_01055640	IP_BHA-CO-2|IP_BHA-CO-1	0|2	2	2	0.42	0.00|0.87	0	0.4363	0.8725	0.5213
MTB	TTHERM_001093489	IP_BHA-CO-2|IP_BHA-CO-1	0|2	2	2	0.44	0.00|0.87	0	0.4363	0.8725	0.5213
MTA	TTHERM_01345820	IP_AHA-S-2|IP_AHA-S-1|IP_AHA-CO-2|IP_AHA-CO-1|IP_AHA-C-3|IP_AHA-C-2|IP_AHA-C-1	0|1|3|0|13|0|0	17	7	0.34	0.00|0.56|0.85|0.00|0.95|0.00|0.00	0	0.3386	0.955	0.5214
MTB	TTHERM_00697370	IP_BHA-CO-2|IP_BHA-CO-1	0|2	2	2	0.43	0.00|0.87	0	0.435	0.87	0.5222
MTB	TTHERM_00502130	IP_BHA-CO-2|IP_BHA-CO-1	0|2	2	2	0.44	0.00|0.87	0	0.435	0.87	0.5222
MTB	TTHERM_00657539	IP_BHA-CO-2|IP_BHA-CO-1	0|2	2	2	0.43	0.00|0.87	0	0.435	0.87	0.5222
MTB	TTHERM_00558490	IP_BHA-CO-2|IP_BHA-CO-1	0|2	2	2	0.41	0.00|0.87	0	0.435	0.87	0.5222
MTB	TTHERM_00621310	IP_BHA-CO-2|IP_BHA-CO-1	0|2	2	2	0.47	0.00|0.87	0	0.4338	0.8675	0.5226
MTB	TTHERM_00709740	IP_BHA-CO-2|IP_BHA-CO-1	0|2	2	2	0.42	0.00|0.87	0	0.4338	0.8675	0.5226
MTB	TTHERM_00726300	IP_BHA-CO-2|IP_BHA-CO-1	0|2	2	2	0.42	0.00|0.87	0	0.4325	0.865	0.523
MTB	TTHERM_00727690	IP_BHA-CO-2|IP_BHA-CO-1	0|2	2	2	0.44	0.00|0.87	0	0.4325	0.865	0.523
MTB	TTHERM_00193750	IP_BHA-CO-2|IP_BHA-CO-1	0|2	2	2	0.43	0.00|0.86	0	0.4312	0.8625	0.5239
MTB	TTHERM_00526400	IP_BHA-CO-2|IP_BHA-CO-1	0|2	2	2	0.42	0.00|0.86	0	0.4312	0.8625	0.5239
MTB	TTHERM_00446390	IP_BHA-CO-2|IP_BHA-CO-1	0|2	2	2	0.41	0.00|0.86	0	0.4312	0.8625	0.5239
MTB	TTHERM_00558010	IP_BHA-CO-2|IP_BHA-CO-1	0|2	2	2	0.41	0.00|0.86	0	0.4312	0.8625	0.5239
MTB	TTHERM_00047490	IP_BHA-CO-2|IP_BHA-CO-1	0|2	2	2	0.44	0.00|0.86	0	0.43	0.86	0.5251
MTB	TTHERM_00670380	IP_BHA-CO-2|IP_BHA-CO-1	0|2	2	2	0.45	0.00|0.86	0	0.43	0.86	0.5251
MTB	TTHERM_000530399	IP_BHA-CO-2|IP_BHA-CO-1	0|2	2	2	0.45	0.00|0.86	0	0.43	0.86	0.5251
MTB	TTHERM_02199750	IP_BHA-CO-2|IP_BHA-CO-1	0|2	2	2	0.42	0.00|0.86	0	0.43	0.86	0.5251
MTB	TTHERM_00780700	IP_BHA-CO-2|IP_BHA-CO-1	0|2	2	2	0.46	0.00|0.86	0	0.43	0.86	0.5251
MTB	TTHERM_000655859	IP_BHA-CO-2|IP_BHA-CO-1	0|2	2	2	0.4	0.00|0.86	0	0.43	0.86	0.5251
MTA	TTHERM_00401940	IP_AHA-S-2|IP_AHA-S-1|IP_AHA-CO-2|IP_AHA-CO-1|IP_AHA-C-3|IP_AHA-C-2|IP_AHA-C-1	4|0|0|0|1|3|0	8	7	0.35	0.90|0.00|0.00|0.00|0.57|0.88|0.00	0	0.3375	0.905	0.5261
MTB	TTHERM_00220600	IP_BHA-CO-2|IP_BHA-CO-1	0|7	7	2	0.42	0.00|0.86	3	0.4287	0.8575	0.5265
MTB	TTHERM_00221170	IP_BHA-CO-2|IP_BHA-CO-1	0|2	2	2	0.41	0.00|0.86	0	0.4287	0.8575	0.5265
MTB	TTHERM_00225860	IP_BHA-CO-2|IP_BHA-CO-1	0|2	2	2	0.44	0.00|0.86	0	0.4287	0.8575	0.5265
MTB	TTHERM_00151190	IP_BHA-CO-2|IP_BHA-CO-1	0|2	2	2	0.42	0.00|0.86	0	0.4287	0.8575	0.5265
MTB	TTHERM_00120830	IP_BHA-CO-2|IP_BHA-CO-1	0|2	2	2	0.41	0.00|0.86	0	0.4287	0.8575	0.5265
MTB	TTHERM_00703660	IP_BHA-CO-2|IP_BHA-CO-1	0|5	5	2	0.42	0.00|0.86	2	0.4287	0.8575	0.5265
MTB	TTHERM_01005320	IP_BHA-CO-2|IP_BHA-CO-1	0|2	2	2	0.45	0.00|0.86	0	0.4287	0.8575	0.5265
MTB	TTHERM_00304130	IP_BHA-CO-2|IP_BHA-CO-1	0|2	2	2	0.44	0.00|0.85	0	0.4275	0.855	0.5269
MTB	TTHERM_000954319	IP_BHA-CO-2|IP_BHA-CO-1	0|2	2	2	0.42	0.00|0.85	0	0.4275	0.855	0.5269
MTB	TTHERM_00471840	IP_BHA-CO-2|IP_BHA-CO-1	0|2	2	2	0.43	0.00|0.85	0	0.4262	0.8525	0.5275
MTB	TTHERM_001166292	IP_BHA-CO-2|IP_BHA-CO-1	0|2	2	2	0.41	0.00|0.85	0	0.4262	0.8525	0.5275
MTB	TTHERM_00499350	IP_BHA-CO-2|IP_BHA-CO-1	0|2	2	2	0.43	0.00|0.85	0	0.4262	0.8525	0.5275
MRC1	TTHERM_00497380	IP_MRC1-S-3|IP_MRC1-S-2|IP_MRC1-S-1|IP_MRC1-CO-2|IP_MRC1-CO-1|IP_MRC1-C-1	0|28|8|0|35|12	83	6	0.36	0.00|1.00|0.00|0.00|1.00|0.05	9	0.3413	1	0.528
MRC1	TTHERM_00474750	IP_MRC1-S-3|IP_MRC1-S-2|IP_MRC1-S-1|IP_MRC1-CO-2|IP_MRC1-CO-1|IP_MRC1-C-1	0|0|0|4|2|1	7	6	0.32	0.00|0.00|0.00|0.87|0.69|0.49	0	0.3413	0.8725	0.528
MTB	TTHERM_000840039	IP_BHA-CO-2|IP_BHA-CO-1	0|2	2	2	0.41	0.00|0.85	0	0.425	0.85	0.5283
MTB	TTHERM_000530789	IP_BHA-CO-2|IP_BHA-CO-1	0|2	2	2	0.48	0.00|0.85	0	0.425	0.85	0.5283
MTB	TTHERM_000088159	IP_BHA-CO-2|IP_BHA-CO-1	0|2	2	2	0.4	0.00|0.85	0	0.425	0.85	0.5283
MTB	TTHERM_01019590	IP_BHA-CO-2|IP_BHA-CO-1	0|2	2	2	0.4	0.00|0.85	0	0.425	0.85	0.5283
MTB	TTHERM_00316010	IP_BHA-CO-2|IP_BHA-CO-1	0|2	2	2	0.46	0.00|0.85	0	0.4237	0.8475	0.5287
MTB	TTHERM_00293380	IP_BHA-CO-2|IP_BHA-CO-1	0|2	2	2	0.4	0.00|0.85	0	0.4237	0.8475	0.5287
MTB	TTHERM_00138430	IP_BHA-CO-2|IP_BHA-CO-1	0|2	2	2	0.42	0.00|0.84	0	0.4225	0.845	0.5291
MTB	TTHERM_01076960	IP_BHA-CO-2|IP_BHA-CO-1	0|2	2	2	0.41	0.00|0.84	0	0.4225	0.845	0.5291
MTB	TTHERM_00521980	IP_BHA-CO-2|IP_BHA-CO-1	0|2	2	2	0.4	0.00|0.84	0	0.4212	0.8425	0.5295
MTB	TTHERM_01123950	IP_BHA-CO-2|IP_BHA-CO-1	0|2	2	2	0.42	0.00|0.84	0	0.4212	0.8425	0.5295
MTB	TTHERM_01369760	IP_BHA-CO-2|IP_BHA-CO-1	0|2	2	2	0.47	0.00|0.84	0	0.42	0.84	0.5299
MTB	TTHERM_00558590	IP_BHA-CO-2|IP_BHA-CO-1	0|2	2	2	0.47	0.00|0.84	0	0.42	0.84	0.5299
MTB	TTHERM_00469060	IP_BHA-CO-2|IP_BHA-CO-1	0|2	2	2	0.35	0.00|0.84	0	0.4187	0.8375	0.5301
MTB	TTHERM_00196300	IP_BHA-CO-2|IP_BHA-CO-1	0|2	2	2	0.39	0.00|0.83	0	0.4162	0.8325	0.5304
MTB	TTHERM_00426080	IP_BHA-CO-2|IP_BHA-CO-1	0|2	2	2	0.45	0.00|0.83	0	0.415	0.83	0.5306
MTA	TTHERM_000655859	IP_AHA-S-2|IP_AHA-S-1|IP_AHA-CO-2|IP_AHA-CO-1|IP_AHA-C-3|IP_AHA-C-2|IP_AHA-C-1	0|1|2|0|3|0|0	6	7	0.3	0.00|0.66|0.78|0.00|0.88|0.00|0.00	0	0.3332	0.8825	0.5307
MTB	TTHERM_00405540	IP_BHA-CO-2|IP_BHA-CO-1	0|2	2	2	0.46	0.00|0.83	0	0.4137	0.8275	0.5308
MTB	TTHERM_00529660	IP_BHA-CO-2|IP_BHA-CO-1	0|5	5	2	0.41	0.00|0.82	2	0.4125	0.825	0.5313
MTB	TTHERM_00346410	IP_BHA-CO-2|IP_BHA-CO-1	0|7	7	2	0.41	0.00|0.82	3	0.4125	0.825	0.5313
MRC1	TTHERM_01084100	IP_MRC1-S-3|IP_MRC1-S-2|IP_MRC1-S-1|IP_MRC1-CO-2|IP_MRC1-CO-1|IP_MRC1-C-1	0|0|0|2|1|5	8	6	0.34	0.00|0.00|0.00|0.78|0.33|0.91	0	0.3371	0.9075	0.5313
MTB	TTHERM_00490630	IP_BHA-CO-2|IP_BHA-CO-1	0|2	2	2	0.36	0.00|0.82	0	0.41	0.82	0.5315
MTB	TTHERM_00492510	IP_BHA-CO-2|IP_BHA-CO-1	0|5	5	2	0.41	0.00|0.82	2	0.4087	0.8175	0.532
MTB	TTHERM_00532600	IP_BHA-CO-2|IP_BHA-CO-1	0|2	2	2	0.38	0.00|0.82	0	0.4087	0.8175	0.532
MTB	TTHERM_00794080	IP_BHA-CO-2|IP_BHA-CO-1	0|2	2	2	0.41	0.00|0.81	0	0.4038	0.8075	0.5322
MTB	TTHERM_00509080	IP_BHA-CO-2|IP_BHA-CO-1	0|5	5	2	0.4	0.00|0.81	2	0.4025	0.805	0.5325
MTB	TTHERM_00444320	IP_BHA-CO-2|IP_BHA-CO-1	0|5	5	2	0.38	0.00|0.80	2	0.4013	0.8025	0.5327
MTB	TTHERM_000339809	IP_BHA-CO-2|IP_BHA-CO-1	0|32	32	2	0.35	0.00|0.68	15	0.3375	0.675	0.5332
MTB	TTHERM_00773580	IP_BHA-CO-2|IP_BHA-CO-1	0|6	6	2	0.37	0.00|0.67	3	0.3363	0.6725	0.5337
MTB	TTHERM_000499375	IP_BHA-CO-2|IP_BHA-CO-1	0|6	6	2	0.32	0.00|0.66	3	0.3312	0.6625	0.5342
MRC1	TTHERM_00444510	IP_MRC1-S-3|IP_MRC1-S-2|IP_MRC1-S-1|IP_MRC1-CO-2|IP_MRC1-CO-1|IP_MRC1-C-1	0|18|6|1|26|1	52	6	0.28	0.00|1.00|0.00|0.00|1.00|0.00	7	0.3329	1	0.5347
MTB	TTHERM_01194830	IP_BHA-CO-2|IP_BHA-CO-1	0|18	18	2	0.33	0.00|0.62	9	0.31	0.62	0.5348
MTA	TTHERM_00391300	IP_AHA-S-2|IP_AHA-S-1|IP_AHA-CO-2|IP_AHA-CO-1|IP_AHA-C-3|IP_AHA-C-2|IP_AHA-C-1	0|1|3|0|2|0|0	6	7	0.33	0.00|0.62|0.86|0.00|0.83|0.00|0.00	0	0.3314	0.8625	0.535
MTB	TTHERM_00295340	IP_BHA-CO-2|IP_BHA-CO-1	0|29	29	2	0.25	0.00|0.60	15	0.3	0.6	0.5355
MTB	TTHERM_00770690	IP_BHA-CO-2|IP_BHA-CO-1	0|13	13	2	0.28	0.00|0.59	7	0.2937	0.5875	0.5361
MTB	TTHERM_00283190	IP_BHA-CO-2|IP_BHA-CO-1	0|8	8	2	0.26	0.00|0.56	4	0.2825	0.565	0.5368
MTB	TTHERM_00558550	IP_BHA-CO-2|IP_BHA-CO-1	0|6	6	2	0.29	0.00|0.53	3	0.2637	0.5275	0.5375
MRC1	TTHERM_00787240	IP_MRC1-S-3|IP_MRC1-S-2|IP_MRC1-S-1|IP_MRC1-CO-2|IP_MRC1-CO-1|IP_MRC1-C-1	0|15|1|0|19|0	35	6	0.31	0.00|1.00|0.00|0.00|1.00|0.00	5	0.3321	0.9975	0.5378
MTA	TTHERM_00421020	IP_AHA-S-2|IP_AHA-S-1|IP_AHA-CO-2|IP_AHA-CO-1|IP_AHA-C-3|IP_AHA-C-2|IP_AHA-C-1	0|4|8|0|1|0|0	13	7	0.28	0.00|0.89|0.92|0.00|0.50|0.00|0.00	0	0.33	0.9175	0.5391
MTB	TTHERM_00151990	IP_BHA-CO-2|IP_BHA-CO-1	0|4	4	2	0.21	0.00|0.49	2	0.2475	0.495	0.5391
MTB	TTHERM_00497960	IP_BHA-CO-2|IP_BHA-CO-1	0|10	10	2	0.24	0.00|0.49	6	0.2475	0.495	0.5391
MTB	TTHERM_01084110	IP_BHA-CO-2|IP_BHA-CO-1	0|4	4	2	0.22	0.00|0.47	2	0.2338	0.4675	0.54
MRC1	TTHERM_00160800	IP_MRC1-S-3|IP_MRC1-S-2|IP_MRC1-S-1|IP_MRC1-CO-2|IP_MRC1-CO-1|IP_MRC1-C-1	0|25|17|0|0|0	42	6	0.34	0.00|1.00|0.99|0.00|0.00|0.00	8	0.3313	0.995	0.5409
MTB	TTHERM_00502240	IP_BHA-CO-2|IP_BHA-CO-1	0|7	7	2	0.22	0.00|0.45	4	0.2237	0.4475	0.5409
MTB	TTHERM_00218410	IP_BHA-CO-2|IP_BHA-CO-1	0|4	4	2	0.23	0.00|0.44	2	0.22	0.44	0.5417
MTB	TTHERM_00259410	IP_BHA-CO-2|IP_BHA-CO-1	0|4	4	2	0.24	0.00|0.44	2	0.2175	0.435	0.5426
MTA	TTHERM_00046740	IP_AHA-S-2|IP_AHA-S-1|IP_AHA-CO-2|IP_AHA-CO-1|IP_AHA-C-3|IP_AHA-C-2|IP_AHA-C-1	0|2|5|0|1|0|0	8	7	0.33	0.00|0.85|0.91|0.00|0.55|0.00|0.00	0	0.3296	0.91	0.5429
MTB	TTHERM_00686150	IP_BHA-CO-2|IP_BHA-CO-1	0|4	4	2	0.22	0.00|0.41	2	0.2075	0.415	0.5435
MRC1	TTHERM_00721530	IP_MRC1-S-3|IP_MRC1-S-2|IP_MRC1-S-1|IP_MRC1-CO-2|IP_MRC1-CO-1|IP_MRC1-C-1	0|3|2|0|1|0	6	6	0.34	0.00|0.84|0.76|0.00|0.37|0.00	0	0.3296	0.8425	0.5438
MTB	TTHERM_00668060	IP_BHA-CO-2|IP_BHA-CO-1	0|4	4	2	0.2	0.00|0.41	2	0.2062	0.4125	0.5445
MTB	TTHERM_00476820	IP_BHA-CO-2|IP_BHA-CO-1	0|9	9	2	0.23	0.00|0.38	5	0.1912	0.3825	0.5454
MTA	TTHERM_00151190	IP_AHA-S-2|IP_AHA-S-1|IP_AHA-CO-2|IP_AHA-CO-1|IP_AHA-C-3|IP_AHA-C-2|IP_AHA-C-1	0|1|2|0|4|0|0	7	7	0.34	0.00|0.64|0.78|0.00|0.88|0.00|0.00	0	0.3293	0.885	0.5466
MRC1	TTHERM_00498150	IP_MRC1-S-3|IP_MRC1-S-2|IP_MRC1-S-1|IP_MRC1-CO-2|IP_MRC1-CO-1|IP_MRC1-C-1	0|2|1|0|2|0	5	6	0.35	0.00|0.75|0.53|0.00|0.69|0.00	0	0.3292	0.7525	0.5466
MTB	TTHERM_00384800	IP_BHA-CO-2|IP_BHA-CO-1	0|4	4	2	0.2	0.00|0.38	2	0.1875	0.375	0.5474
MTB	TTHERM_000688599	IP_BHA-CO-2|IP_BHA-CO-1	0|4	4	2	0.15	0.00|0.38	2	0.1875	0.375	0.5474
MTB	TTHERM_01048110	IP_BHA-CO-2|IP_BHA-CO-1	0|4	4	2	0.16	0.00|0.35	2	0.1762	0.3525	0.5483
MRC1	TTHERM_00476670	IP_MRC1-S-3|IP_MRC1-S-2|IP_MRC1-S-1|IP_MRC1-CO-2|IP_MRC1-CO-1|IP_MRC1-C-1	0|30|6|2|36|1	75	6	0.39	0.00|0.98|0.00|0.00|1.00|0.00	13	0.3288	0.995	0.5493
MTB	TTHERM_00476670	IP_BHA-CO-2|IP_BHA-CO-1	0|24	24	2	0.16	0.00|0.34	13	0.1725	0.345	0.5493
MTA	TTHERM_00300410	IP_AHA-S-2|IP_AHA-S-1|IP_AHA-CO-2|IP_AHA-CO-1|IP_AHA-C-3|IP_AHA-C-2|IP_AHA-C-1	0|0|3|0|2|1|0	6	7	0.36	0.00|0.00|0.88|0.00|0.85|0.56|0.00	0	0.3289	0.885	0.55
MTB	TTHERM_00943010	IP_BHA-CO-2|IP_BHA-CO-1	0|14	14	2	0.17	0.00|0.32	8	0.1612	0.3225	0.5504
MTB	TTHERM_00285620	IP_BHA-CO-2|IP_BHA-CO-1	0|14	14	2	0.16	0.00|0.31	8	0.1562	0.3125	0.5514
MRC1	TTHERM_01080490	IP_MRC1-S-3|IP_MRC1-S-2|IP_MRC1-S-1|IP_MRC1-CO-2|IP_MRC1-CO-1|IP_MRC1-C-1	0|9|0|1|11|2	23	6	0.32	0.00|0.98|0.00|0.00|0.99|0.00	3	0.3287	0.9875	0.5519
MTB	TTHERM_00196650	IP_BHA-CO-2|IP_BHA-CO-1	0|9	9	2	0.14	0.00|0.30	6	0.1512	0.3025	0.5525
MTA	TTHERM_00476510	IP_AHA-S-2|IP_AHA-S-1|IP_AHA-CO-2|IP_AHA-CO-1|IP_AHA-C-3|IP_AHA-C-2|IP_AHA-C-1	0|4|4|0|1|0|0	9	7	0.28	0.00|0.88|0.88|0.00|0.50|0.00|0.00	0	0.325	0.885	0.5534
MTB	TTHERM_00052510	IP_BHA-CO-2|IP_BHA-CO-1	0|14	14	2	0.13	0.00|0.26	8	0.1312	0.2625	0.5536
MRC1	TTHERM_00686150	IP_MRC1-S-3|IP_MRC1-S-2|IP_MRC1-S-1|IP_MRC1-CO-2|IP_MRC1-CO-1|IP_MRC1-C-1	1|7|2|1|21|1	33	6	0.38	0.00|0.94|0.01|0.00|1.00|0.00	2	0.3254	1	0.5545
MTB	TTHERM_00161050	IP_BHA-CO-2|IP_BHA-CO-1	0|12	12	2	0.12	0.00|0.26	8	0.1287	0.2575	0.5547
MTA	TTHERM_00471530	IP_AHA-S-2|IP_AHA-S-1|IP_AHA-CO-2|IP_AHA-CO-1|IP_AHA-C-3|IP_AHA-C-2|IP_AHA-C-1	0|5|0|0|8|1|0	14	7	0.27	0.00|0.88|0.00|0.00|0.96|0.41|0.00	0	0.3221	0.9575	0.5567
MTB	TTHERM_00377400	IP_BHA-CO-2|IP_BHA-CO-1	0|7	7	2	0.11	0.00|0.25	4	0.1275	0.255	0.5569
MTB	TTHERM_00564280	IP_BHA-CO-2|IP_BHA-CO-1	0|7	7	2	0.16	0.00|0.25	4	0.1275	0.255	0.5569
MRC1	TTHERM_01099050	IP_MRC1-S-3|IP_MRC1-S-2|IP_MRC1-S-1|IP_MRC1-CO-2|IP_MRC1-CO-1|IP_MRC1-C-1	0|12|0|1|18|0	31	6	0.31	0.00|0.95|0.00|0.00|1.00|0.00	5	0.3246	0.995	0.557
MTB	TTHERM_01049320	IP_BHA-CO-2|IP_BHA-CO-1	0|5	5	2	0.12	0.00|0.24	3	0.12	0.24	0.5581
MTB	TTHERM_01287980	IP_BHA-CO-2|IP_BHA-CO-1	0|3	3	2	0.13	0.00|0.24	2	0.1187	0.2375	0.5592
MRC1	TTHERM_00325580	IP_MRC1-S-3|IP_MRC1-S-2|IP_MRC1-S-1|IP_MRC1-CO-2|IP_MRC1-CO-1|IP_MRC1-C-1	0|7|0|0|16|0	23	6	0.33	0.00|0.97|0.00|0.00|0.97|0.00	0	0.3242	0.975	0.5593
MTB	TTHERM_00456800	IP_BHA-CO-2|IP_BHA-CO-1	0|8	8	2	0.09	0.00|0.22	5	0.1088	0.2175	0.5603
MTB	TTHERM_00594210	IP_BHA-CO-2|IP_BHA-CO-1	0|5	5	2	0.09	0.00|0.21	3	0.1037	0.2075	0.5615
MRC1	TTHERM_00697420	IP_MRC1-S-3|IP_MRC1-S-2|IP_MRC1-S-1|IP_MRC1-CO-2|IP_MRC1-CO-1|IP_MRC1-C-1	0|5|0|0|6|0	11	6	0.32	0.00|0.97|0.00|0.00|0.97|0.00	0	0.3237	0.9725	0.5616
MTB	TTHERM_00079910	IP_BHA-CO-2|IP_BHA-CO-1	0|5	5	2	0.09	0.00|0.17	3	0.0875	0.175	0.5627
MTA	TTHERM_01004920	IP_AHA-S-2|IP_AHA-S-1|IP_AHA-CO-2|IP_AHA-CO-1|IP_AHA-C-3|IP_AHA-C-2|IP_AHA-C-1	0|3|2|0|0|0|2	7	7	0.33	0.00|0.87|0.77|0.00|0.00|0.00|0.61	0	0.3214	0.87	0.5628
MTA	TTHERM_00243800	IP_AHA-S-2|IP_AHA-S-1|IP_AHA-CO-2|IP_AHA-CO-1|IP_AHA-C-3|IP_AHA-C-2|IP_AHA-C-1	1|0|2|0|0|2|0	5	7	0.29	0.67|0.00|0.77|0.00|0.00|0.81|0.00	0	0.3214	0.8125	0.5628
MRC1	TTHERM_00992760	IP_MRC1-S-3|IP_MRC1-S-2|IP_MRC1-S-1|IP_MRC1-CO-2|IP_MRC1-CO-1|IP_MRC1-C-1	0|8|2|0|11|0	21	6	0.31	0.00|0.96|0.00|0.00|0.97|0.00	3	0.3221	0.975	0.5639
MTB	TTHERM_00016060	IP_BHA-CO-2|IP_BHA-CO-1	0|8	8	2	0.08	0.00|0.16	5	0.08	0.16	0.5639
MTB	TTHERM_00268000	IP_BHA-CO-2|IP_BHA-CO-1	0|3	3	2	0.08	0.00|0.16	2	0.0787	0.1575	0.5651
MTA	TTHERM_01362500	IP_AHA-S-2|IP_AHA-S-1|IP_AHA-CO-2|IP_AHA-CO-1|IP_AHA-C-3|IP_AHA-C-2|IP_AHA-C-1	0|2|1|0|6|0|0	9	7	0.32	0.00|0.88|0.38|0.00|0.96|0.00|0.00	0	0.3168	0.9575	0.5657
MRC1	TTHERM_00329800	IP_MRC1-S-3|IP_MRC1-S-2|IP_MRC1-S-1|IP_MRC1-CO-2|IP_MRC1-CO-1|IP_MRC1-C-1	0|7|0|0|10|0	17	6	0.28	0.00|0.96|0.00|0.00|0.97|0.00	0	0.3217	0.97	0.566
MTB	TTHERM_00408840	IP_BHA-CO-2|IP_BHA-CO-1	0|3	3	2	0.07	0.00|0.15	2	0.0763	0.1525	0.5664
MTB	TTHERM_00865270	IP_BHA-CO-2|IP_BHA-CO-1	0|3	3	2	0.06	0.00|0.15	2	0.075	0.15	0.5676
MRC1	TTHERM_00942970	IP_MRC1-S-3|IP_MRC1-S-2|IP_MRC1-S-1|IP_MRC1-CO-2|IP_MRC1-CO-1|IP_MRC1-C-1	0|2|1|0|2|0	5	6	0.36	0.00|0.69|0.52|0.00|0.69|0.00	0	0.3171	0.695	0.5682
MTA	TTHERM_00046250	IP_AHA-S-2|IP_AHA-S-1|IP_AHA-CO-2|IP_AHA-CO-1|IP_AHA-C-3|IP_AHA-C-2|IP_AHA-C-1	0|0|13|0|2|1|0	16	7	0.31	0.00|0.00|0.99|0.00|0.84|0.38|0.00	0	0.3157	0.9875	0.5685
MTB	TTHERM_00013790	IP_BHA-CO-2|IP_BHA-CO-1	0|3	3	2	0.07	0.00|0.14	2	0.0712	0.1425	0.5688
MTB	TTHERM_00497380	IP_BHA-CO-2|IP_BHA-CO-1	0|15	15	2	0.07	0.00|0.14	9	0.0688	0.1375	0.57
MRC1	TTHERM_01262890	IP_MRC1-S-3|IP_MRC1-S-2|IP_MRC1-S-1|IP_MRC1-CO-2|IP_MRC1-CO-1|IP_MRC1-C-1	0|0|0|4|7|0	11	6	0.34	0.00|0.00|0.00|0.91|0.98|0.00	0	0.315	0.9775	0.5703
MTB	TTHERM_00023980	IP_BHA-CO-2|IP_BHA-CO-1	0|3	3	2	0.07	0.00|0.13	2	0.0675	0.135	0.5712
MTA	TTHERM_00313090	IP_AHA-S-2|IP_AHA-S-1|IP_AHA-CO-2|IP_AHA-CO-1|IP_AHA-C-3|IP_AHA-C-2|IP_AHA-C-1	0|2|1|0|0|3|0	6	7	0.31	0.00|0.83|0.45|0.00|0.00|0.89|0.00	0	0.3104	0.8925	0.5714
MRC1	TTHERM_00678360	IP_MRC1-S-3|IP_MRC1-S-2|IP_MRC1-S-1|IP_MRC1-CO-2|IP_MRC1-CO-1|IP_MRC1-C-1	2|1|1|0|1|0	5	6	0.36	0.64|0.39|0.49|0.00|0.36|0.00	0	0.3142	0.6425	0.5724
MTB	TTHERM_00794110	IP_BHA-CO-2|IP_BHA-CO-1	0|3	3	2	0.08	0.00|0.13	2	0.065	0.13	0.5737
MTB	TTHERM_00469380	IP_BHA-CO-2|IP_BHA-CO-1	0|54	54	2	0.05	0.00|0.13	29	0.065	0.13	0.5737
MTA	TTHERM_00670500	IP_AHA-S-2|IP_AHA-S-1|IP_AHA-CO-2|IP_AHA-CO-1|IP_AHA-C-3|IP_AHA-C-2|IP_AHA-C-1	0|5|1|0|8|0|0	14	7	0.34	0.00|0.92|0.27|0.00|0.97|0.00|0.00	0	0.3082	0.9675	0.5741
MTB	TTHERM_00649280	IP_BHA-CO-2|IP_BHA-CO-1	0|3	3	2	0.06	0.00|0.12	2	0.06	0.12	0.5761
MTB	TTHERM_00648930	IP_BHA-CO-2|IP_BHA-CO-1	0|3	3	2	0.05	0.00|0.12	2	0.06	0.12	0.5761
MRC1	TTHERM_00079320	IP_MRC1-S-3|IP_MRC1-S-2|IP_MRC1-S-1|IP_MRC1-CO-2|IP_MRC1-CO-1|IP_MRC1-C-1	0|5|0|0|6|0	11	6	0.35	0.00|0.93|0.00|0.00|0.95|0.00	0	0.3129	0.9475	0.5763
MRC1	TTHERM_00721640	IP_MRC1-S-3|IP_MRC1-S-2|IP_MRC1-S-1|IP_MRC1-CO-2|IP_MRC1-CO-1|IP_MRC1-C-1	0|2|1|0|2|0	5	6	0.31	0.00|0.70|0.48|0.00|0.69|0.00	0	0.3129	0.7025	0.5763
MTA	TTHERM_00589960	IP_AHA-S-2|IP_AHA-S-1|IP_AHA-CO-2|IP_AHA-CO-1|IP_AHA-C-3|IP_AHA-C-2|IP_AHA-C-1	0|1|3|0|1|0|0	5	7	0.31	0.00|0.62|0.88|0.00|0.64|0.00|0.00	0	0.3057	0.8825	0.5768
MTB	TTHERM_01099050	IP_BHA-CO-2|IP_BHA-CO-1	0|7	7	2	0.07	0.00|0.11	5	0.0575	0.115	0.5773
MRC1	TTHERM_00637400	IP_MRC1-S-3|IP_MRC1-S-2|IP_MRC1-S-1|IP_MRC1-CO-2|IP_MRC1-CO-1|IP_MRC1-C-1	0|4|0|0|7|0	11	6	0.36	0.00|0.92|0.00|0.00|0.96|0.00	0	0.3129	0.96	0.5782
MTB	TTHERM_00400750	IP_BHA-CO-2|IP_BHA-CO-1	0|13	13	2	0.05	0.00|0.11	9	0.055	0.11	0.5785
MTA	TTHERM_00293380	IP_AHA-S-2|IP_AHA-S-1|IP_AHA-CO-2|IP_AHA-CO-1|IP_AHA-C-3|IP_AHA-C-2|IP_AHA-C-1	0|1|6|0|1|0|0	8	7	0.28	0.00|0.64|0.94|0.00|0.55|0.00|0.00	0	0.3029	0.935	0.5794
MTB	TTHERM_00146410	IP_BHA-CO-2|IP_BHA-CO-1	0|6	6	2	0.05	0.00|0.10	4	0.0512	0.1025	0.5797
MTB	TTHERM_000859349	IP_BHA-CO-2|IP_BHA-CO-1	0|6	6	2	0.06	0.00|0.09	4	0.0475	0.095	0.5809
MTA	TTHERM_00896070	IP_AHA-S-2|IP_AHA-S-1|IP_AHA-CO-2|IP_AHA-CO-1|IP_AHA-C-3|IP_AHA-C-2|IP_AHA-C-1	1|1|0|0|4|0|0	6	7	0.27	0.63|0.57|0.00|0.00|0.90|0.00|0.00	0	0.3	0.8975	0.582
MTB	TTHERM_00812780	IP_BHA-CO-2|IP_BHA-CO-1	0|6	6	2	0.03	0.00|0.07	4	0.0375	0.075	0.5822
MTB	TTHERM_00353480	IP_BHA-CO-2|IP_BHA-CO-1	0|8	8	2	0.04	0.00|0.06	6	0.0325	0.065	0.5834
MRC1	TTHERM_000859349	IP_MRC1-S-3|IP_MRC1-S-2|IP_MRC1-S-1|IP_MRC1-CO-2|IP_MRC1-CO-1|IP_MRC1-C-1	0|10|8|0|3|0	21	6	0.31	0.00|0.95|0.92|0.00|0.00|0.00	4	0.3121	0.955	0.5835
MRC1	TTHERM_000530789	IP_MRC1-S-3|IP_MRC1-S-2|IP_MRC1-S-1|IP_MRC1-CO-2|IP_MRC1-CO-1|IP_MRC1-C-1	0|2|1|0|2|0	5	6	0.33	0.00|0.72|0.48|0.00|0.67|0.00	0	0.3121	0.725	0.5835
MRC1	TTHERM_00245360	IP_MRC1-S-3|IP_MRC1-S-2|IP_MRC1-S-1|IP_MRC1-CO-2|IP_MRC1-CO-1|IP_MRC1-C-1	4|1|0|0|1|1	7	6	0.3	0.67|0.36|0.00|0.00|0.35|0.49	0	0.3121	0.67	0.5835
MTA	TTHERM_000931898	IP_AHA-S-2|IP_AHA-S-1|IP_AHA-CO-2|IP_AHA-CO-1|IP_AHA-C-3|IP_AHA-C-2|IP_AHA-C-1	1|0|5|0|0|1|0	7	7	0.24	0.65|0.00|0.93|0.00|0.00|0.50|0.00	0	0.2986	0.93	0.5844
MTB	TTHERM_00780960	IP_BHA-CO-2|IP_BHA-CO-1	0|13	13	2	0.03	0.00|0.06	8	0.0287	0.0575	0.5847
MRC1	TTHERM_00670500	IP_MRC1-S-3|IP_MRC1-S-2|IP_MRC1-S-1|IP_MRC1-CO-2|IP_MRC1-CO-1|IP_MRC1-C-1	0|0|0|3|0|7	10	6	0.3	0.00|0.00|0.00|0.91|0.00|0.94	0	0.3096	0.945	0.5852
MTB	TTHERM_00227270	IP_BHA-CO-2|IP_BHA-CO-1	0|28	28	2	0.04	0.00|0.05	16	0.0275	0.055	0.5859
MRC1	TTHERM_01093500	IP_MRC1-S-3|IP_MRC1-S-2|IP_MRC1-S-1|IP_MRC1-CO-2|IP_MRC1-CO-1|IP_MRC1-C-1	0|6|0|0|4|0	10	6	0.31	0.00|0.95|0.00|0.00|0.90|0.00	0	0.3083	0.95	0.5869
MTA	TTHERM_00494370	IP_AHA-S-2|IP_AHA-S-1|IP_AHA-CO-2|IP_AHA-CO-1|IP_AHA-C-3|IP_AHA-C-2|IP_AHA-C-1	1|0|8|0|0|1|0	10	7	0.29	0.67|0.00|0.95|0.00|0.00|0.45|0.00	0	0.2961	0.9525	0.5869
MTB	TTHERM_00773330	IP_BHA-CO-2|IP_BHA-CO-1	0|15	15	2	0.02	0.00|0.05	10	0.0262	0.0525	0.5872
MRC1	TTHERM_00565630	IP_MRC1-S-3|IP_MRC1-S-2|IP_MRC1-S-1|IP_MRC1-CO-2|IP_MRC1-CO-1|IP_MRC1-C-1	0|0|0|5|0|6	11	6	0.33	0.00|0.00|0.00|0.91|0.00|0.93	0	0.3067	0.9275	0.5885
MRC1	TTHERM_00471530	IP_MRC1-S-3|IP_MRC1-S-2|IP_MRC1-S-1|IP_MRC1-CO-2|IP_MRC1-CO-1|IP_MRC1-C-1	0|0|0|3|0|7	10	6	0.29	0.00|0.00|0.00|0.86|0.00|0.96	0	0.3033	0.9575	0.5902
MTB	TTHERM_00649410	IP_BHA-CO-2|IP_BHA-CO-1	0|4	4	2	0.02	0.00|0.04	3	0.0213	0.0425	0.5909
MTB	TTHERM_00454080	IP_BHA-CO-2|IP_BHA-CO-1	0|18	18	2	0.02	0.00|0.04	11	0.0213	0.0425	0.5909
MTB	TTHERM_00853120	IP_BHA-CO-2|IP_BHA-CO-1	0|2	2	2	0.03	0.00|0.04	2	0.0213	0.0425	0.5909
MTA	TTHERM_00628610	IP_AHA-S-2|IP_AHA-S-1|IP_AHA-CO-2|IP_AHA-CO-1|IP_AHA-C-3|IP_AHA-C-2|IP_AHA-C-1	1|0|4|0|0|1|0	6	7	0.32	0.69|0.00|0.90|0.00|0.00|0.45|0.00	0	0.2914	0.9	0.5917
MTA	TTHERM_000530789	IP_AHA-S-2|IP_AHA-S-1|IP_AHA-CO-2|IP_AHA-CO-1|IP_AHA-C-3|IP_AHA-C-2|IP_AHA-C-1	2|0|1|0|0|3|0	6	7	0.29	0.75|0.00|0.41|0.00|0.00|0.88|0.00	0	0.2914	0.88	0.5917
MRC1	TTHERM_01435670	IP_MRC1-S-3|IP_MRC1-S-2|IP_MRC1-S-1|IP_MRC1-CO-2|IP_MRC1-CO-1|IP_MRC1-C-1	0|0|0|3|0|6	9	6	0.27	0.00|0.00|0.00|0.87|0.00|0.94	0	0.3025	0.9425	0.5918
MRC1	TTHERM_00140980	IP_MRC1-S-3|IP_MRC1-S-2|IP_MRC1-S-1|IP_MRC1-CO-2|IP_MRC1-CO-1|IP_MRC1-C-1	0|4|0|0|4|0	8	6	0.31	0.00|0.91|0.00|0.00|0.88|0.00	0	0.2979	0.91	0.5934
MTA	TTHERM_00443010	IP_AHA-S-2|IP_AHA-S-1|IP_AHA-CO-2|IP_AHA-CO-1|IP_AHA-C-3|IP_AHA-C-2|IP_AHA-C-1	0|3|0|0|1|0|1	5	7	0.28	0.00|0.85|0.00|0.00|0.60|0.00|0.58	0	0.2904	0.8525	0.5939
MTB	TTHERM_00626980	IP_BHA-CO-2|IP_BHA-CO-1	0|4	4	2	0.02	0.00|0.04	3	0.0187	0.0375	0.5946
MTB	TTHERM_00456870	IP_BHA-CO-2|IP_BHA-CO-1	0|2	2	2	0.02	0.00|0.04	2	0.0187	0.0375	0.5946
MTB	TTHERM_01207660	IP_BHA-CO-2|IP_BHA-CO-1	0|2	2	2	0.02	0.00|0.04	2	0.0187	0.0375	0.5946
MRC1	TTHERM_00780960	IP_MRC1-S-3|IP_MRC1-S-2|IP_MRC1-S-1|IP_MRC1-CO-2|IP_MRC1-CO-1|IP_MRC1-C-1	0|17|10|0|20|1	48	6	0.28	0.00|0.81|0.00|0.00|0.97|0.00	8	0.2971	0.9725	0.595
MTA	TTHERM_00194760	IP_AHA-S-2|IP_AHA-S-1|IP_AHA-CO-2|IP_AHA-CO-1|IP_AHA-C-3|IP_AHA-C-2|IP_AHA-C-1	0|4|0|1|1|0|0	6	7	0.29	0.00|0.92|0.00|0.57|0.54|0.00|0.00	0	0.29	0.9175	0.5961
MRC1	TTHERM_00492740	IP_MRC1-S-3|IP_MRC1-S-2|IP_MRC1-S-1|IP_MRC1-CO-2|IP_MRC1-CO-1|IP_MRC1-C-1	0|0|0|4|4|0	8	6	0.28	0.00|0.00|0.00|0.89|0.87|0.00	0	0.2946	0.895	0.5965
MRC1	TTHERM_00046740	IP_MRC1-S-3|IP_MRC1-S-2|IP_MRC1-S-1|IP_MRC1-CO-2|IP_MRC1-CO-1|IP_MRC1-C-1	0|2|0|12|1|0	15	6	0.31	0.00|0.67|0.00|0.92|0.17|0.00	0	0.2937	0.925	0.5981
MTA	TTHERM_00316010	IP_AHA-S-2|IP_AHA-S-1|IP_AHA-CO-2|IP_AHA-CO-1|IP_AHA-C-3|IP_AHA-C-2|IP_AHA-C-1	1|2|0|0|1|0|0	4	7	0.3	0.66|0.83|0.00|0.00|0.53|0.00|0.00	0	0.2896	0.835	0.5982
MTB	TTHERM_000570549	IP_BHA-CO-2|IP_BHA-CO-1	0|4	4	2	0.01	0.00|0.03	3	0.015	0.03	0.5983
MTB	TTHERM_00439000	IP_BHA-CO-2|IP_BHA-CO-1	0|2	2	2	0.01	0.00|0.03	2	0.015	0.03	0.5983
MTB	TTHERM_00444500	IP_BHA-CO-2|IP_BHA-CO-1	0|2	2	2	0.01	0.00|0.03	2	0.015	0.03	0.5983
MTB	TTHERM_00190830	IP_BHA-CO-2|IP_BHA-CO-1	1|6	7	2	0.02	0.00|0.03	4	0.0137	0.0275	0.5995
MRC1	TTHERM_00419850	IP_MRC1-S-3|IP_MRC1-S-2|IP_MRC1-S-1|IP_MRC1-CO-2|IP_MRC1-CO-1|IP_MRC1-C-1	0|1|1|0|4|0	6	6	0.33	0.00|0.35|0.50|0.00|0.89|0.00	0	0.2917	0.895	0.5996
MTA	TTHERM_00444320	IP_AHA-S-2|IP_AHA-S-1|IP_AHA-CO-2|IP_AHA-CO-1|IP_AHA-C-3|IP_AHA-C-2|IP_AHA-C-1	0|5|2|0|6|0|0	13	7	0.24	0.00|0.98|0.01|0.00|1.00|0.00|0.00	2	0.2839	0.995	0.6004
MRC1	TTHERM_00365340	IP_MRC1-S-3|IP_MRC1-S-2|IP_MRC1-S-1|IP_MRC1-CO-2|IP_MRC1-CO-1|IP_MRC1-C-1	0|4|1|42|13|35	95	6	0.31	0.00|0.00|0.00|0.98|0.00|0.76	17	0.29	0.9775	0.6011
MTB	TTHERM_00037090	IP_BHA-CO-2|IP_BHA-CO-1	0|2	2	2	0.01	0.00|0.02	2	0.0125	0.025	0.6019
MTB	TTHERM_00600709	IP_BHA-CO-2|IP_BHA-CO-1	0|2	2	2	0.01	0.00|0.02	2	0.0125	0.025	0.6019
MTA	TTHERM_00144900	IP_AHA-S-2|IP_AHA-S-1|IP_AHA-CO-2|IP_AHA-CO-1|IP_AHA-C-3|IP_AHA-C-2|IP_AHA-C-1	0|2|1|0|0|2|0	5	7	0.28	0.00|0.82|0.39|0.00|0.00|0.77|0.00	0	0.2832	0.82	0.6024
MRC1	TTHERM_00421020	IP_MRC1-S-3|IP_MRC1-S-2|IP_MRC1-S-1|IP_MRC1-CO-2|IP_MRC1-CO-1|IP_MRC1-C-1	0|1|0|7|0|1	9	6	0.28	0.00|0.36|0.00|0.88|0.00|0.50	0	0.2892	0.88	0.6041
MRC1	TTHERM_00947450	IP_MRC1-S-3|IP_MRC1-S-2|IP_MRC1-S-1|IP_MRC1-CO-2|IP_MRC1-CO-1|IP_MRC1-C-1	0|3|1|0|1|0	5	6	0.3	0.00|0.81|0.52|0.00|0.41|0.00	0	0.2892	0.8125	0.6041
MTA	TTHERM_00938910	IP_AHA-S-2|IP_AHA-S-1|IP_AHA-CO-2|IP_AHA-CO-1|IP_AHA-C-3|IP_AHA-C-2|IP_AHA-C-1	0|1|2|0|1|0|0	4	7	0.27	0.00|0.63|0.76|0.00|0.57|0.00|0.00	0	0.2807	0.7575	0.6045
MRC1	TTHERM_00138430	IP_MRC1-S-3|IP_MRC1-S-2|IP_MRC1-S-1|IP_MRC1-CO-2|IP_MRC1-CO-1|IP_MRC1-C-1	0|0|0|5|0|2	7	6	0.27	0.00|0.00|0.00|0.94|0.00|0.78	0	0.2862	0.935	0.6055
MTA	TTHERM_000840039	IP_AHA-S-2|IP_AHA-S-1|IP_AHA-CO-2|IP_AHA-CO-1|IP_AHA-C-3|IP_AHA-C-2|IP_AHA-C-1	0|1|1|0|0|4|0	6	7	0.3	0.00|0.66|0.41|0.00|0.00|0.88|0.00	0	0.2789	0.885	0.6065
MRC1	TTHERM_00716190	IP_MRC1-S-3|IP_MRC1-S-2|IP_MRC1-S-1|IP_MRC1-CO-2|IP_MRC1-CO-1|IP_MRC1-C-1	0|2|0|0|7|0	9	6	0.25	0.00|0.76|0.00|0.00|0.95|0.00	0	0.2854	0.9525	0.6069
MRC1	TTHERM_000131239	IP_MRC1-S-3|IP_MRC1-S-2|IP_MRC1-S-1|IP_MRC1-CO-2|IP_MRC1-CO-1|IP_MRC1-C-1	0|1|0|0|3|1	5	6	0.29	0.00|0.43|0.00|0.00|0.77|0.50	0	0.2842	0.77	0.6083
MTA	TTHERM_01080490	IP_AHA-S-2|IP_AHA-S-1|IP_AHA-CO-2|IP_AHA-CO-1|IP_AHA-C-3|IP_AHA-C-2|IP_AHA-C-1	6|0|7|0|0|0|0	13	7	0.3	0.99|0.00|0.91|0.00|0.00|0.00|0.00	3	0.2714	0.99	0.6086
MTB	TTHERM_00431340	IP_BHA-CO-2|IP_BHA-CO-1	0|2	2	2	0.01	0.00|0.02	2	0.01	0.02	0.609
MTB	TTHERM_00938750	IP_BHA-CO-2|IP_BHA-CO-1	0|2	2	2	0	0.00|0.02	2	0.01	0.02	0.609
MTB	TTHERM_00850570	IP_BHA-CO-2|IP_BHA-CO-1	0|4	4	2	0.01	0.00|0.02	3	0.01	0.02	0.609
MTB	TTHERM_00260690	IP_BHA-CO-2|IP_BHA-CO-1	0|2	2	2	0.01	0.00|0.02	2	0.01	0.02	0.609
MTB	TTHERM_01243470	IP_BHA-CO-2|IP_BHA-CO-1	0|2	2	2	0.01	0.00|0.02	2	0.01	0.02	0.609
MTB	TTHERM_00787270	IP_BHA-CO-2|IP_BHA-CO-1	0|2	2	2	0.01	0.00|0.02	2	0.01	0.02	0.609
MRC1	TTHERM_00502130	IP_MRC1-S-3|IP_MRC1-S-2|IP_MRC1-S-1|IP_MRC1-CO-2|IP_MRC1-CO-1|IP_MRC1-C-1	0|2|1|0|0|1	4	6	0.27	0.00|0.67|0.51|0.00|0.00|0.50	0	0.2817	0.67	0.6097
MRC1	TTHERM_00997670	IP_MRC1-S-3|IP_MRC1-S-2|IP_MRC1-S-1|IP_MRC1-CO-2|IP_MRC1-CO-1|IP_MRC1-C-1	0|3|0|0|3|0	6	6	0.27	0.00|0.84|0.00|0.00|0.84|0.00	0	0.2796	0.84	0.6111
MRC1	TTHERM_00486810	IP_MRC1-S-3|IP_MRC1-S-2|IP_MRC1-S-1|IP_MRC1-CO-2|IP_MRC1-CO-1|IP_MRC1-C-1	0|0|0|2|0|3	5	6	0.29	0.00|0.00|0.00|0.80|0.00|0.88	0	0.2792	0.875	0.6124
MTB	TTHERM_00343440	IP_BHA-CO-2|IP_BHA-CO-1	0|3	3	2	0.01	0.00|0.02	3	0.0088	0.0175	0.6124
MTB	TTHERM_00444850	IP_BHA-CO-2|IP_BHA-CO-1	0|2	2	2	0.01	0.00|0.02	2	0.0088	0.0175	0.6124
MTB	TTHERM_00069210	IP_BHA-CO-2|IP_BHA-CO-1	0|4	4	2	0.01	0.00|0.02	3	0.0088	0.0175	0.6124
MTA	TTHERM_00534080	IP_AHA-S-2|IP_AHA-S-1|IP_AHA-CO-2|IP_AHA-CO-1|IP_AHA-C-3|IP_AHA-C-2|IP_AHA-C-1	0|0|1|0|4|1|0	6	7	0.26	0.00|0.00|0.45|0.00|0.89|0.52|0.00	0	0.2675	0.895	0.6126
MTA	TTHERM_00442960	IP_AHA-S-2|IP_AHA-S-1|IP_AHA-CO-2|IP_AHA-CO-1|IP_AHA-C-3|IP_AHA-C-2|IP_AHA-C-1	0|0|2|0|1|1|0	4	7	0.26	0.00|0.00|0.76|0.00|0.59|0.52|0.00	0	0.2675	0.765	0.6126
MRC1	TTHERM_00890150	IP_MRC1-S-3|IP_MRC1-S-2|IP_MRC1-S-1|IP_MRC1-CO-2|IP_MRC1-CO-1|IP_MRC1-C-1	0|2|6|0|0|0	8	6	0.25	0.00|0.71|0.95|0.00|0.00|0.00	0	0.2775	0.95	0.6138
MTA	TTHERM_00942970	IP_AHA-S-2|IP_AHA-S-1|IP_AHA-CO-2|IP_AHA-CO-1|IP_AHA-C-3|IP_AHA-C-2|IP_AHA-C-1	1|0|2|0|0|1|0	4	7	0.28	0.63|0.00|0.75|0.00|0.00|0.47|0.00	0	0.2664	0.755	0.6146
MRC1	TTHERM_00194760	IP_MRC1-S-3|IP_MRC1-S-2|IP_MRC1-S-1|IP_MRC1-CO-2|IP_MRC1-CO-1|IP_MRC1-C-1	3|1|0|0|0|1	5	6	0.28	0.73|0.38|0.00|0.00|0.00|0.53	0	0.2733	0.735	0.6152
MRC1	TTHERM_00408950	IP_MRC1-S-3|IP_MRC1-S-2|IP_MRC1-S-1|IP_MRC1-CO-2|IP_MRC1-CO-1|IP_MRC1-C-1	0|2|0|0|5|0	7	6	0.29	0.00|0.72|0.00|0.00|0.91|0.00	0	0.2721	0.91	0.6165
MTA	TTHERM_00028580	IP_AHA-S-2|IP_AHA-S-1|IP_AHA-CO-2|IP_AHA-CO-1|IP_AHA-C-3|IP_AHA-C-2|IP_AHA-C-1	0|0|3|0|10|0|0	13	7	0.27	0.00|0.00|0.88|0.00|0.98|0.00|0.00	0	0.2661	0.98	0.6165
MTB	TTHERM_00486790	IP_BHA-CO-2|IP_BHA-CO-1	0|2	2	2	0.01	0.00|0.01	2	0.0075	0.015	0.6169
MTB	TTHERM_00302100	IP_BHA-CO-2|IP_BHA-CO-1	0|2	2	2	0	0.00|0.01	2	0.0075	0.015	0.6169
MTB	TTHERM_01289150	IP_BHA-CO-2|IP_BHA-CO-1	0|5	5	2	0	0.00|0.01	4	0.0075	0.015	0.6169
MTB	TTHERM_00979780	IP_BHA-CO-2|IP_BHA-CO-1	0|2	2	2	0.01	0.00|0.01	2	0.0075	0.015	0.6169
MRC1	TTHERM_00411740	IP_MRC1-S-3|IP_MRC1-S-2|IP_MRC1-S-1|IP_MRC1-CO-2|IP_MRC1-CO-1|IP_MRC1-C-1	0|3|2|0|0|0	5	6	0.24	0.00|0.83|0.79|0.00|0.00|0.00	0	0.27	0.8275	0.6178
MTB	TTHERM_000287919	IP_BHA-CO-2|IP_BHA-CO-1	0|3	3	2	0	0.00|0.01	3	0.0062	0.0125	0.6181
MTA	TTHERM_00037050	IP_AHA-S-2|IP_AHA-S-1|IP_AHA-CO-2|IP_AHA-CO-1|IP_AHA-C-3|IP_AHA-C-2|IP_AHA-C-1	0|12|2|0|8|1|0	23	7	0.29	0.00|1.00|0.00|0.00|0.86|0.00|0.00	4	0.2657	1	0.6183
MRC1	TTHERM_01051730	IP_MRC1-S-3|IP_MRC1-S-2|IP_MRC1-S-1|IP_MRC1-CO-2|IP_MRC1-CO-1|IP_MRC1-C-1	0|4|0|0|3|0	7	6	0.28	0.00|0.85|0.00|0.00|0.77|0.00	0	0.2696	0.8475	0.6191
MTA	TTHERM_00784530	IP_AHA-S-2|IP_AHA-S-1|IP_AHA-CO-2|IP_AHA-CO-1|IP_AHA-C-3|IP_AHA-C-2|IP_AHA-C-1	2|1|1|0|0|0|0	4	7	0.24	0.81|0.62|0.43|0.00|0.00|0.00|0.00	0	0.265	0.805	0.6201
MRC1	TTHERM_00387080	IP_MRC1-S-3|IP_MRC1-S-2|IP_MRC1-S-1|IP_MRC1-CO-2|IP_MRC1-CO-1|IP_MRC1-C-1	2|0|1|0|0|1	4	6	0.25	0.69|0.00|0.44|0.00|0.00|0.47	0	0.2688	0.6925	0.6204
MTB	TTHERM_00476640	IP_BHA-CO-2|IP_BHA-CO-1	0|6	6	2	0	0.00|0.01	5	0.005	0.01	0.6214
MTB	TTHERM_00526450	IP_BHA-CO-2|IP_BHA-CO-1	0|8	8	2	0.01	0.00|0.01	6	0.005	0.01	0.6214
MTB	TTHERM_00101330	IP_BHA-CO-2|IP_BHA-CO-1	0|2	2	2	0	0.00|0.01	2	0.005	0.01	0.6214
MRC1	TTHERM_00313080	IP_MRC1-S-3|IP_MRC1-S-2|IP_MRC1-S-1|IP_MRC1-CO-2|IP_MRC1-CO-1|IP_MRC1-C-1	0|0|2|0|0|3	5	6	0.25	0.00|0.00|0.77|0.00|0.00|0.83	0	0.2667	0.8275	0.6217
MTA	TTHERM_00636860	IP_AHA-S-2|IP_AHA-S-1|IP_AHA-CO-2|IP_AHA-CO-1|IP_AHA-C-3|IP_AHA-C-2|IP_AHA-C-1	0|2|1|0|1|0|0	4	7	0.25	0.00|0.83|0.45|0.00|0.56|0.00|0.00	0	0.2621	0.83	0.6219
MTB	TTHERM_01057750	IP_BHA-CO-2|IP_BHA-CO-1	0|9	9	2	0.01	0.00|0.01	7	0.0037	0.0075	0.6225
MRC1	TTHERM_00070850	IP_MRC1-S-3|IP_MRC1-S-2|IP_MRC1-S-1|IP_MRC1-CO-2|IP_MRC1-CO-1|IP_MRC1-C-1	0|2|4|0|0|0	6	6	0.26	0.00|0.70|0.88|0.00|0.00|0.00	0	0.2642	0.88	0.623
MTA	TTHERM_00535150	IP_AHA-S-2|IP_AHA-S-1|IP_AHA-CO-2|IP_AHA-CO-1|IP_AHA-C-3|IP_AHA-C-2|IP_AHA-C-1	0|1|1|0|0|2|0	4	7	0.27	0.00|0.63|0.40|0.00|0.00|0.80|0.00	0	0.2614	0.7975	0.6236
MRC1	TTHERM_01345820	IP_MRC1-S-3|IP_MRC1-S-2|IP_MRC1-S-1|IP_MRC1-CO-2|IP_MRC1-CO-1|IP_MRC1-C-1	0|0|0|3|0|2	5	6	0.26	0.00|0.00|0.00|0.83|0.00|0.75	0	0.2633	0.83	0.6243
MTA	TTHERM_00722920	IP_AHA-S-2|IP_AHA-S-1|IP_AHA-CO-2|IP_AHA-CO-1|IP_AHA-C-3|IP_AHA-C-2|IP_AHA-C-1	2|2|0|2|6|1|4	17	7	0.25	0.00|0.00|0.00|0.00|0.87|0.00|0.95	3	0.2604	0.955	0.6254
MRC1	TTHERM_00085100	IP_MRC1-S-3|IP_MRC1-S-2|IP_MRC1-S-1|IP_MRC1-CO-2|IP_MRC1-CO-1|IP_MRC1-C-1	0|3|0|0|2|0	5	6	0.28	0.00|0.85|0.00|0.00|0.71|0.00	0	0.2608	0.85	0.6255
MTB	TTHERM_00787250	IP_BHA-CO-2|IP_BHA-CO-1	0|6	6	2	0	0.00|0.00	5	0.0025	0.005	0.6258
MTB	TTHERM_00160770	IP_BHA-CO-2|IP_BHA-CO-1	0|3	3	2	0	0.00|0.00	3	0.0025	0.005	0.6258
MTB	TTHERM_00193410	IP_BHA-CO-2|IP_BHA-CO-1	0|8	8	2	0	0.00|0.00	6	0.0025	0.005	0.6258
MTA	TTHERM_000160999	IP_AHA-S-2|IP_AHA-S-1|IP_AHA-CO-2|IP_AHA-CO-1|IP_AHA-C-3|IP_AHA-C-2|IP_AHA-C-1	0|0|3|0|0|5|0	8	7	0.26	0.00|0.00|0.89|0.00|0.00|0.93|0.00	0	0.26	0.93	0.627
MRC1	TTHERM_00106969	IP_MRC1-S-3|IP_MRC1-S-2|IP_MRC1-S-1|IP_MRC1-CO-2|IP_MRC1-CO-1|IP_MRC1-C-1	0|5|0|0|2|0	7	6	0.28	0.00|0.89|0.00|0.00|0.67|0.00	0	0.26	0.8925	0.628
MRC1	TTHERM_00471150	IP_MRC1-S-3|IP_MRC1-S-2|IP_MRC1-S-1|IP_MRC1-CO-2|IP_MRC1-CO-1|IP_MRC1-C-1	0|2|1|0|1|0	4	6	0.26	0.00|0.71|0.49|0.00|0.36|0.00	0	0.26	0.7075	0.628
MTA	TTHERM_00657230	IP_AHA-S-2|IP_AHA-S-1|IP_AHA-CO-2|IP_AHA-CO-1|IP_AHA-C-3|IP_AHA-C-2|IP_AHA-C-1	0|0|4|0|0|3|0	7	7	0.26	0.00|0.00|0.91|0.00|0.00|0.90|0.00	0	0.2596	0.9125	0.6286
MTA	TTHERM_00120830	IP_AHA-S-2|IP_AHA-S-1|IP_AHA-CO-2|IP_AHA-CO-1|IP_AHA-C-3|IP_AHA-C-2|IP_AHA-C-1	0|0|6|0|2|0|0	8	7	0.27	0.00|0.00|0.93|0.00|0.88|0.00|0.00	0	0.2579	0.9275	0.6302
MRC1	TTHERM_00193200	IP_MRC1-S-3|IP_MRC1-S-2|IP_MRC1-S-1|IP_MRC1-CO-2|IP_MRC1-CO-1|IP_MRC1-C-1	0|0|0|3|0|2	5	6	0.26	0.00|0.00|0.00|0.82|0.00|0.73	0	0.2583	0.8175	0.6304
MRC1	TTHERM_00189460	IP_MRC1-S-3|IP_MRC1-S-2|IP_MRC1-S-1|IP_MRC1-CO-2|IP_MRC1-CO-1|IP_MRC1-C-1	0|1|0|2|0|1	4	6	0.25	0.00|0.35|0.00|0.75|0.00|0.45	0	0.2583	0.75	0.6304
MRC1	TTHERM_00469070	IP_MRC1-S-3|IP_MRC1-S-2|IP_MRC1-S-1|IP_MRC1-CO-2|IP_MRC1-CO-1|IP_MRC1-C-1	0|0|2|0|0|2	4	6	0.28	0.00|0.00|0.76|0.00|0.00|0.78	0	0.2575	0.78	0.6315
MTA	TTHERM_00488350	IP_AHA-S-2|IP_AHA-S-1|IP_AHA-CO-2|IP_AHA-CO-1|IP_AHA-C-3|IP_AHA-C-2|IP_AHA-C-1	0|4|3|0|5|0|0	12	7	0.28	0.00|0.79|0.05|0.00|0.95|0.00|0.00	2	0.2575	0.955	0.6318
MRC1	TTHERM_00997520	IP_MRC1-S-3|IP_MRC1-S-2|IP_MRC1-S-1|IP_MRC1-CO-2|IP_MRC1-CO-1|IP_MRC1-C-1	0|2|0|0|3|0	5	6	0.25	0.00|0.72|0.00|0.00|0.82|0.00	0	0.2571	0.82	0.6327
MTA	TTHERM_00189460	IP_AHA-S-2|IP_AHA-S-1|IP_AHA-CO-2|IP_AHA-CO-1|IP_AHA-C-3|IP_AHA-C-2|IP_AHA-C-1	0|4|0|0|3|0|0	7	7	0.28	0.00|0.90|0.00|0.00|0.89|0.00|0.00	0	0.2568	0.9025	0.6333
MRC1	TTHERM_00732640	IP_MRC1-S-3|IP_MRC1-S-2|IP_MRC1-S-1|IP_MRC1-CO-2|IP_MRC1-CO-1|IP_MRC1-C-1	0|16|1|1|27|3	48	6	0.25	0.00|0.54|0.00|0.00|0.99|0.00	9	0.2554	0.9925	0.6338
MTB	TTHERM_00134940	IP_BHA-CO-2|IP_BHA-CO-1	0|20	20	2	0	0.00|0.00	14	0.0012	0.0025	0.6342
MTB	TTHERM_01276340	IP_BHA-CO-2|IP_BHA-CO-1	0|11	11	2	0	0.00|0.00	8	0.0012	0.0025	0.6342
MTB	TTHERM_00576920	IP_BHA-CO-2|IP_BHA-CO-1	0|2	2	2	0	0.00|0.00	3	0.0012	0.0025	0.6342
MTB	TTHERM_00641240	IP_BHA-CO-2|IP_BHA-CO-1	0|5	5	2	0	0.00|0.00	4	0.0012	0.0025	0.6342
MTB	TTHERM_01020880	IP_BHA-CO-2|IP_BHA-CO-1	0|5	5	2	0	0.00|0.00	4	0.0012	0.0025	0.6342
MTB	TTHERM_00219370	IP_BHA-CO-2|IP_BHA-CO-1	0|2	2	2	0	0.00|0.00	3	0.0012	0.0025	0.6342
MTB	TTHERM_01289080	IP_BHA-CO-2|IP_BHA-CO-1	0|3	3	2	0	0.00|0.00	3	0.0012	0.0025	0.6342
MTB	TTHERM_00295170	IP_BHA-CO-2|IP_BHA-CO-1	0|25	25	2	0	0.00|0.00	17	0.0012	0.0025	0.6342
MTA	TTHERM_00474750	IP_AHA-S-2|IP_AHA-S-1|IP_AHA-CO-2|IP_AHA-CO-1|IP_AHA-C-3|IP_AHA-C-2|IP_AHA-C-1	0|0|6|0|5|0|0	11	7	0.25	0.00|0.00|0.90|0.00|0.88|0.00|0.00	0	0.255	0.905	0.6348
MRC1	TTHERM_000131339	IP_MRC1-S-3|IP_MRC1-S-2|IP_MRC1-S-1|IP_MRC1-CO-2|IP_MRC1-CO-1|IP_MRC1-C-1	0|2|1|0|1|0	4	6	0.24	0.00|0.68|0.50|0.00|0.35|0.00	0	0.255	0.68	0.635
MRC1	TTHERM_01055540	IP_MRC1-S-3|IP_MRC1-S-2|IP_MRC1-S-1|IP_MRC1-CO-2|IP_MRC1-CO-1|IP_MRC1-C-1	0|1|0|3|1|0	5	6	0.26	0.00|0.38|0.00|0.83|0.30|0.00	0	0.2508	0.83	0.6361
MTA	TTHERM_00225870	IP_AHA-S-2|IP_AHA-S-1|IP_AHA-CO-2|IP_AHA-CO-1|IP_AHA-C-3|IP_AHA-C-2|IP_AHA-C-1	2|0|1|0|0|1|0	4	7	0.28	0.81|0.00|0.47|0.00|0.00|0.51|0.00	0	0.2546	0.8075	0.6363
MRC1	TTHERM_00663810	IP_MRC1-S-3|IP_MRC1-S-2|IP_MRC1-S-1|IP_MRC1-CO-2|IP_MRC1-CO-1|IP_MRC1-C-1	0|2|0|0|3|0	5	6	0.26	0.00|0.69|0.00|0.00|0.81|0.00	0	0.2504	0.8075	0.6372
MTA	TTHERM_00073200	IP_AHA-S-2|IP_AHA-S-1|IP_AHA-CO-2|IP_AHA-CO-1|IP_AHA-C-3|IP_AHA-C-2|IP_AHA-C-1	0|4|4|0|4|0|0	12	7	0.29	0.00|0.75|0.35|0.00|0.66|0.00|0.00	2	0.2518	0.7525	0.6378
MRC1	TTHERM_00293370	IP_MRC1-S-3|IP_MRC1-S-2|IP_MRC1-S-1|IP_MRC1-CO-2|IP_MRC1-CO-1|IP_MRC1-C-1	0|2|0|0|2|0	4	6	0.24	0.00|0.75|0.00|0.00|0.70|0.00	0	0.2421	0.75	0.6384
MTA	TTHERM_00237560	IP_AHA-S-2|IP_AHA-S-1|IP_AHA-CO-2|IP_AHA-CO-1|IP_AHA-C-3|IP_AHA-C-2|IP_AHA-C-1	4|0|0|0|3|0|0	7	7	0.23	0.88|0.00|0.00|0.00|0.88|0.00|0.00	0	0.2514	0.885	0.6392
MRC1	TTHERM_00191800	IP_MRC1-S-3|IP_MRC1-S-2|IP_MRC1-S-1|IP_MRC1-CO-2|IP_MRC1-CO-1|IP_MRC1-C-1	0|0|0|1|0|8	9	6	0.25	0.00|0.00|0.00|0.52|0.00|0.93	0	0.2413	0.93	0.6396
MTA	TTHERM_00091490	IP_AHA-S-2|IP_AHA-S-1|IP_AHA-CO-2|IP_AHA-CO-1|IP_AHA-C-3|IP_AHA-C-2|IP_AHA-C-1	0|2|0|0|4|0|0	6	7	0.25	0.00|0.85|0.00|0.00|0.89|0.00|0.00	0	0.2489	0.8925	0.6406
MRC1	TTHERM_00227770	IP_MRC1-S-3|IP_MRC1-S-2|IP_MRC1-S-1|IP_MRC1-CO-2|IP_MRC1-CO-1|IP_MRC1-C-1	0|4|3|0|7|0	14	6	0.2	0.00|0.35|0.13|0.00|0.94|0.00	2	0.2387	0.9425	0.6407
MRC1	TTHERM_00997780	IP_MRC1-S-3|IP_MRC1-S-2|IP_MRC1-S-1|IP_MRC1-CO-2|IP_MRC1-CO-1|IP_MRC1-C-1	0|0|0|1|0|4	5	6	0.24	0.00|0.00|0.00|0.56|0.00|0.86	0	0.2375	0.86	0.6419
MTA	TTHERM_00106969	IP_AHA-S-2|IP_AHA-S-1|IP_AHA-CO-2|IP_AHA-CO-1|IP_AHA-C-3|IP_AHA-C-2|IP_AHA-C-1	0|0|3|0|0|3|0	6	7	0.27	0.00|0.00|0.85|0.00|0.00|0.88|0.00	0	0.2475	0.8775	0.6421
MRC1	TTHERM_00470810	IP_MRC1-S-3|IP_MRC1-S-2|IP_MRC1-S-1|IP_MRC1-CO-2|IP_MRC1-CO-1|IP_MRC1-C-1	0|2|0|0|2|0	4	6	0.22	0.00|0.72|0.00|0.00|0.70|0.00	0	0.2371	0.72	0.643
MTA	TTHERM_00343500	IP_AHA-S-2|IP_AHA-S-1|IP_AHA-CO-2|IP_AHA-CO-1|IP_AHA-C-3|IP_AHA-C-2|IP_AHA-C-1	0|2|3|0|0|0|0	5	7	0.24	0.00|0.82|0.88|0.00|0.00|0.00|0.00	0	0.2429	0.875	0.6435
MRC1	TTHERM_00118600	IP_MRC1-S-3|IP_MRC1-S-2|IP_MRC1-S-1|IP_MRC1-CO-2|IP_MRC1-CO-1|IP_MRC1-C-1	0|0|0|1|0|4	5	6	0.23	0.00|0.00|0.00|0.55|0.00|0.86	0	0.2346	0.8625	0.6442
MTA	TTHERM_01262890	IP_AHA-S-2|IP_AHA-S-1|IP_AHA-CO-2|IP_AHA-CO-1|IP_AHA-C-3|IP_AHA-C-2|IP_AHA-C-1	0|0|2|0|6|0|0	8	7	0.2	0.00|0.00|0.75|0.00|0.94|0.00|0.00	0	0.2407	0.935	0.6449
MRC1	TTHERM_00136240	IP_MRC1-S-3|IP_MRC1-S-2|IP_MRC1-S-1|IP_MRC1-CO-2|IP_MRC1-CO-1|IP_MRC1-C-1	0|5|0|0|5|0	10	6	0.26	0.00|0.75|0.00|0.00|0.64|0.00	2	0.2329	0.755	0.6453
MTA	TTHERM_00467520	IP_AHA-S-2|IP_AHA-S-1|IP_AHA-CO-2|IP_AHA-CO-1|IP_AHA-C-3|IP_AHA-C-2|IP_AHA-C-1	0|0|2|0|0|3|0	5	7	0.23	0.00|0.00|0.79|0.00|0.00|0.89|0.00	0	0.24	0.8925	0.6463
MRC1	TTHERM_00534080	IP_MRC1-S-3|IP_MRC1-S-2|IP_MRC1-S-1|IP_MRC1-CO-2|IP_MRC1-CO-1|IP_MRC1-C-1	0|0|0|1|0|7	8	6	0.23	0.00|0.00|0.00|0.46|0.00|0.91	0	0.2287	0.9125	0.6465
MTA	TTHERM_00313080	IP_AHA-S-2|IP_AHA-S-1|IP_AHA-CO-2|IP_AHA-CO-1|IP_AHA-C-3|IP_AHA-C-2|IP_AHA-C-1	2|0|1|0|0|1|0	4	7	0.26	0.78|0.00|0.39|0.00|0.00|0.49|0.00	0	0.2371	0.7775	0.6477
MRC1	TTHERM_00293380	IP_MRC1-S-3|IP_MRC1-S-2|IP_MRC1-S-1|IP_MRC1-CO-2|IP_MRC1-CO-1|IP_MRC1-C-1	0|0|0|6|0|1	7	6	0.22	0.00|0.00|0.00|0.90|0.00|0.43	0	0.2225	0.9025	0.6488
MRC1	TTHERM_00069400	IP_MRC1-S-3|IP_MRC1-S-2|IP_MRC1-S-1|IP_MRC1-CO-2|IP_MRC1-CO-1|IP_MRC1-C-1	0|0|0|3|0|1	4	6	0.25	0.00|0.00|0.00|0.82|0.00|0.51	0	0.2225	0.825	0.6488
MTA	TTHERM_00160770	IP_AHA-S-2|IP_AHA-S-1|IP_AHA-CO-2|IP_AHA-CO-1|IP_AHA-C-3|IP_AHA-C-2|IP_AHA-C-1	1|5|4|0|4|12|0	26	7	0.24	0.00|0.60|0.01|0.00|0.04|1.00|0.00	3	0.2361	0.9975	0.6491
MRC1	TTHERM_00497450	IP_MRC1-S-3|IP_MRC1-S-2|IP_MRC1-S-1|IP_MRC1-CO-2|IP_MRC1-CO-1|IP_MRC1-C-1	0|2|0|0|2|0	4	6	0.2	0.00|0.66|0.00|0.00|0.67|0.00	0	0.2221	0.6675	0.65
MTA	TTHERM_00302050	IP_AHA-S-2|IP_AHA-S-1|IP_AHA-CO-2|IP_AHA-CO-1|IP_AHA-C-3|IP_AHA-C-2|IP_AHA-C-1	2|0|1|0|0|1|0	4	7	0.21	0.75|0.00|0.40|0.00|0.00|0.50|0.00	0	0.2357	0.7525	0.6505
MRC1	TTHERM_00055990	IP_MRC1-S-3|IP_MRC1-S-2|IP_MRC1-S-1|IP_MRC1-CO-2|IP_MRC1-CO-1|IP_MRC1-C-1	1|43|9|1|53|12	119	6	0.23	0.00|0.40|0.00|0.00|0.93|0.00	26	0.2217	0.9325	0.6511
MTA	TTHERM_00522940	IP_AHA-S-2|IP_AHA-S-1|IP_AHA-CO-2|IP_AHA-CO-1|IP_AHA-C-3|IP_AHA-C-2|IP_AHA-C-1	0|0|2|0|0|2|0	4	7	0.22	0.00|0.00|0.77|0.00|0.00|0.83|0.00	0	0.23	0.835	0.6519
MRC1	TTHERM_00579030	IP_MRC1-S-3|IP_MRC1-S-2|IP_MRC1-S-1|IP_MRC1-CO-2|IP_MRC1-CO-1|IP_MRC1-C-1	0|0|0|4|0|1	5	6	0.22	0.00|0.00|0.00|0.86|0.00|0.47	0	0.2212	0.8575	0.6522
MTA	TTHERM_000530399	IP_AHA-S-2|IP_AHA-S-1|IP_AHA-CO-2|IP_AHA-CO-1|IP_AHA-C-3|IP_AHA-C-2|IP_AHA-C-1	0|0|2|0|0|2|0	4	7	0.26	0.00|0.00|0.78|0.00|0.00|0.81|0.00	0	0.2279	0.8125	0.6532
MRC1	TTHERM_00074300	IP_MRC1-S-3|IP_MRC1-S-2|IP_MRC1-S-1|IP_MRC1-CO-2|IP_MRC1-CO-1|IP_MRC1-C-1	0|0|0|1|3|0	4	6	0.21	0.00|0.00|0.00|0.53|0.78|0.00	0	0.2196	0.785	0.6534
MRC1	TTHERM_01044720	IP_MRC1-S-3|IP_MRC1-S-2|IP_MRC1-S-1|IP_MRC1-CO-2|IP_MRC1-CO-1|IP_MRC1-C-1	0|0|0|2|0|1	3	6	0.2	0.00|0.00|0.00|0.78|0.00|0.49	0	0.2129	0.785	0.6545
MTA	TTHERM_00346540	IP_AHA-S-2|IP_AHA-S-1|IP_AHA-CO-2|IP_AHA-CO-1|IP_AHA-C-3|IP_AHA-C-2|IP_AHA-C-1	0|0|6|0|10|9|4	29	7	0.2	0.00|0.00|0.00|0.00|0.91|0.66|0.00	5	0.225	0.9075	0.6546
MRC1	TTHERM_00399550	IP_MRC1-S-3|IP_MRC1-S-2|IP_MRC1-S-1|IP_MRC1-CO-2|IP_MRC1-CO-1|IP_MRC1-C-1	0|0|0|2|0|1	3	6	0.22	0.00|0.00|0.00|0.78|0.00|0.48	0	0.2104	0.7775	0.6557
MTA	TTHERM_00052130	IP_AHA-S-2|IP_AHA-S-1|IP_AHA-CO-2|IP_AHA-CO-1|IP_AHA-C-3|IP_AHA-C-2|IP_AHA-C-1	1|0|5|0|0|0|0	6	7	0.21	0.65|0.00|0.91|0.00|0.00|0.00|0.00	0	0.2236	0.9125	0.656
MRC1	TTHERM_00151210	IP_MRC1-S-3|IP_MRC1-S-2|IP_MRC1-S-1|IP_MRC1-CO-2|IP_MRC1-CO-1|IP_MRC1-C-1	0|0|0|8|0|1	9	6	0.24	0.00|0.00|0.00|0.88|0.00|0.38	0	0.21	0.8825	0.6568
MRC1	TTHERM_00144840	IP_MRC1-S-3|IP_MRC1-S-2|IP_MRC1-S-1|IP_MRC1-CO-2|IP_MRC1-CO-1|IP_MRC1-C-1	0|1|0|0|4|0	5	6	0.22	0.00|0.38|0.00|0.00|0.88|0.00	0	0.2092	0.88	0.6579
MTA	TTHERM_00052180	IP_AHA-S-2|IP_AHA-S-1|IP_AHA-CO-2|IP_AHA-CO-1|IP_AHA-C-3|IP_AHA-C-2|IP_AHA-C-1	0|1|0|0|7|0|0	8	7	0.23	0.00|0.59|0.00|0.00|0.97|0.00|0.00	0	0.2232	0.9675	0.6587
MTA	TTHERM_00794120	IP_AHA-S-2|IP_AHA-S-1|IP_AHA-CO-2|IP_AHA-CO-1|IP_AHA-C-3|IP_AHA-C-2|IP_AHA-C-1	2|0|2|0|0|0|0	4	7	0.25	0.78|0.00|0.78|0.00|0.00|0.00|0.00	0	0.2232	0.785	0.6587
MRC1	TTHERM_00941480	IP_MRC1-S-3|IP_MRC1-S-2|IP_MRC1-S-1|IP_MRC1-CO-2|IP_MRC1-CO-1|IP_MRC1-C-1	0|0|0|2|0|1	3	6	0.2	0.00|0.00|0.00|0.76|0.00|0.48	0	0.2083	0.765	0.659
MTA	TTHERM_00772060	IP_AHA-S-2|IP_AHA-S-1|IP_AHA-CO-2|IP_AHA-CO-1|IP_AHA-C-3|IP_AHA-C-2|IP_AHA-C-1	0|1|6|0|0|0|0	7	7	0.22	0.00|0.64|0.90|0.00|0.00|0.00|0.00	0	0.22	0.9	0.66
MRC1	TTHERM_00765330	IP_MRC1-S-3|IP_MRC1-S-2|IP_MRC1-S-1|IP_MRC1-CO-2|IP_MRC1-CO-1|IP_MRC1-C-1	0|3|1|0|0|0	4	6	0.2	0.00|0.76|0.49|0.00|0.00|0.00	0	0.2079	0.76	0.6601
MRC1	TTHERM_00037090	IP_MRC1-S-3|IP_MRC1-S-2|IP_MRC1-S-1|IP_MRC1-CO-2|IP_MRC1-CO-1|IP_MRC1-C-1	0|4|1|1|7|1	14	6	0.19	0.00|0.32|0.00|0.00|0.91|0.00	2	0.2075	0.915	0.6612
MTA	TTHERM_01369760	IP_AHA-S-2|IP_AHA-S-1|IP_AHA-CO-2|IP_AHA-CO-1|IP_AHA-C-3|IP_AHA-C-2|IP_AHA-C-1	2|0|2|0|0|0|0	4	7	0.19	0.79|0.00|0.75|0.00|0.00|0.00|0.00	0	0.2193	0.7875	0.6613
MRC1	TTHERM_00355700	IP_MRC1-S-3|IP_MRC1-S-2|IP_MRC1-S-1|IP_MRC1-CO-2|IP_MRC1-CO-1|IP_MRC1-C-1	0|1|3|0|0|0	4	6	0.2	0.00|0.38|0.84|0.00|0.00|0.00	0	0.2037	0.8425	0.6623
MTA	TTHERM_01083030	IP_AHA-S-2|IP_AHA-S-1|IP_AHA-CO-2|IP_AHA-CO-1|IP_AHA-C-3|IP_AHA-C-2|IP_AHA-C-1	3|0|0|0|0|2|0	5	7	0.19	0.78|0.00|0.00|0.00|0.00|0.76|0.00	0	0.2193	0.7775	0.6625
MRC1	TTHERM_00028580	IP_MRC1-S-3|IP_MRC1-S-2|IP_MRC1-S-1|IP_MRC1-CO-2|IP_MRC1-CO-1|IP_MRC1-C-1	0|0|0|2|0|1	3	6	0.23	0.00|0.00|0.00|0.78|0.00|0.44	0	0.2025	0.7775	0.6634
MTA	TTHERM_00410150	IP_AHA-S-2|IP_AHA-S-1|IP_AHA-CO-2|IP_AHA-CO-1|IP_AHA-C-3|IP_AHA-C-2|IP_AHA-C-1	0|0|0|0|6|0|1	7	7	0.19	0.00|0.00|0.00|0.00|0.92|0.00|0.61	0	0.2179	0.9175	0.6638
MRC1	TTHERM_00494490	IP_MRC1-S-3|IP_MRC1-S-2|IP_MRC1-S-1|IP_MRC1-CO-2|IP_MRC1-CO-1|IP_MRC1-C-1	0|2|1|0|0|0	3	6	0.24	0.00|0.68|0.53|0.00|0.00|0.00	0	0.2021	0.6775	0.6645
MRC1	TTHERM_01076980	IP_MRC1-S-3|IP_MRC1-S-2|IP_MRC1-S-1|IP_MRC1-CO-2|IP_MRC1-CO-1|IP_MRC1-C-1	0|0|0|2|0|1	3	6	0.2	0.00|0.00|0.00|0.74|0.00|0.47	0	0.2017	0.74	0.6656
MRC1	TTHERM_00242260	IP_MRC1-S-3|IP_MRC1-S-2|IP_MRC1-S-1|IP_MRC1-CO-2|IP_MRC1-CO-1|IP_MRC1-C-1	0|0|0|2|0|1	3	6	0.17	0.00|0.00|0.00|0.76|0.00|0.45	0	0.2017	0.7625	0.6666
MTA	TTHERM_00469070	IP_AHA-S-2|IP_AHA-S-1|IP_AHA-CO-2|IP_AHA-CO-1|IP_AHA-C-3|IP_AHA-C-2|IP_AHA-C-1	1|7|0|0|0|0|0	8	7	0.19	0.59|0.93|0.00|0.00|0.00|0.00|0.00	0	0.2175	0.93	0.6674
MTA	TTHERM_00470810	IP_AHA-S-2|IP_AHA-S-1|IP_AHA-CO-2|IP_AHA-CO-1|IP_AHA-C-3|IP_AHA-C-2|IP_AHA-C-1	1|0|0|0|0|3|0	4	7	0.24	0.64|0.00|0.00|0.00|0.00|0.88|0.00	0	0.2175	0.8775	0.6674
MTA	TTHERM_01318430	IP_AHA-S-2|IP_AHA-S-1|IP_AHA-CO-2|IP_AHA-CO-1|IP_AHA-C-3|IP_AHA-C-2|IP_AHA-C-1	0|0|2|0|0|2|0	4	7	0.19	0.00|0.00|0.73|0.00|0.00|0.79|0.00	0	0.2175	0.79	0.6674
MRC1	TTHERM_00047700	IP_MRC1-S-3|IP_MRC1-S-2|IP_MRC1-S-1|IP_MRC1-CO-2|IP_MRC1-CO-1|IP_MRC1-C-1	0|0|0|2|0|1	3	6	0.24	0.00|0.00|0.00|0.75|0.00|0.45	0	0.1996	0.745	0.6676
MTA	TTHERM_00835020	IP_AHA-S-2|IP_AHA-S-1|IP_AHA-CO-2|IP_AHA-CO-1|IP_AHA-C-3|IP_AHA-C-2|IP_AHA-C-1	0|0|0|0|1|4|0	5	7	0.2	0.00|0.00|0.00|0.00|0.63|0.89|0.00	0	0.2164	0.8875	0.6686
MRC1	TTHERM_01097950	IP_MRC1-S-3|IP_MRC1-S-2|IP_MRC1-S-1|IP_MRC1-CO-2|IP_MRC1-CO-1|IP_MRC1-C-1	0|2|0|0|0|1	3	6	0.2	0.00|0.70|0.00|0.00|0.00|0.50	0	0.1992	0.6975	0.6687
MRC1	TTHERM_00785870	IP_MRC1-S-3|IP_MRC1-S-2|IP_MRC1-S-1|IP_MRC1-CO-2|IP_MRC1-CO-1|IP_MRC1-C-1	0|1|0|0|3|0	4	6	0.19	0.00|0.40|0.00|0.00|0.80|0.00	0	0.1992	0.7975	0.6697
MTA	TTHERM_00264680	IP_AHA-S-2|IP_AHA-S-1|IP_AHA-CO-2|IP_AHA-CO-1|IP_AHA-C-3|IP_AHA-C-2|IP_AHA-C-1	0|1|0|0|5|0|0	6	7	0.23	0.00|0.63|0.00|0.00|0.88|0.00|0.00	0	0.2154	0.88	0.6698
MRC1	TTHERM_00848060	IP_MRC1-S-3|IP_MRC1-S-2|IP_MRC1-S-1|IP_MRC1-CO-2|IP_MRC1-CO-1|IP_MRC1-C-1	3|0|0|0|0|1	4	6	0.19	0.73|0.00|0.00|0.00|0.00|0.46	0	0.1987	0.7325	0.6707
MTA	TTHERM_00492740	IP_AHA-S-2|IP_AHA-S-1|IP_AHA-CO-2|IP_AHA-CO-1|IP_AHA-C-3|IP_AHA-C-2|IP_AHA-C-1	0|0|10|0|1|0|0	11	7	0.22	0.00|0.00|0.97|0.00|0.53|0.00|0.00	0	0.2139	0.97	0.6709
MRC1	TTHERM_00624740	IP_MRC1-S-3|IP_MRC1-S-2|IP_MRC1-S-1|IP_MRC1-CO-2|IP_MRC1-CO-1|IP_MRC1-C-1	0|1|0|0|3|0	4	6	0.22	0.00|0.36|0.00|0.00|0.82|0.00	0	0.1983	0.825	0.6717
MTA	TTHERM_00079900	IP_AHA-S-2|IP_AHA-S-1|IP_AHA-CO-2|IP_AHA-CO-1|IP_AHA-C-3|IP_AHA-C-2|IP_AHA-C-1	1|3|0|0|0|0|0	4	7	0.22	0.65|0.84|0.00|0.00|0.00|0.00|0.00	0	0.2132	0.845	0.6721
MRC1	TTHERM_00056140	IP_MRC1-S-3|IP_MRC1-S-2|IP_MRC1-S-1|IP_MRC1-CO-2|IP_MRC1-CO-1|IP_MRC1-C-1	0|0|0|4|0|8	12	6	0.18	0.00|0.00|0.00|0.19|0.00|0.99	3	0.1979	0.9925	0.6727
MRC1	TTHERM_00074320	IP_MRC1-S-3|IP_MRC1-S-2|IP_MRC1-S-1|IP_MRC1-CO-2|IP_MRC1-CO-1|IP_MRC1-C-1	1|3|2|3|1|16	26	6	0.2	0.00|0.02|0.00|0.14|0.00|1.00	2	0.1963	1	0.6737
MTA	TTHERM_00760400	IP_AHA-S-2|IP_AHA-S-1|IP_AHA-CO-2|IP_AHA-CO-1|IP_AHA-C-3|IP_AHA-C-2|IP_AHA-C-1	0|1|0|0|5|0|0	6	7	0.21	0.00|0.57|0.00|0.00|0.91|0.00|0.00	0	0.2121	0.915	0.6743
MTA	TTHERM_01016220	IP_AHA-S-2|IP_AHA-S-1|IP_AHA-CO-2|IP_AHA-CO-1|IP_AHA-C-3|IP_AHA-C-2|IP_AHA-C-1	0|1|0|0|2|0|0	3	7	0.22	0.00|0.63|0.00|0.00|0.86|0.00|0.00	0	0.2121	0.8575	0.6743
MRC1	TTHERM_00220590	IP_MRC1-S-3|IP_MRC1-S-2|IP_MRC1-S-1|IP_MRC1-CO-2|IP_MRC1-CO-1|IP_MRC1-C-1	0|4|0|0|1|0	5	6	0.19	0.00|0.84|0.00|0.00|0.33|0.00	0	0.195	0.8425	0.6746
MTA	TTHERM_00193200	IP_AHA-S-2|IP_AHA-S-1|IP_AHA-CO-2|IP_AHA-CO-1|IP_AHA-C-3|IP_AHA-C-2|IP_AHA-C-1	0|1|0|0|2|0|0	3	7	0.21	0.00|0.66|0.00|0.00|0.82|0.00|0.00	0	0.2118	0.82	0.6754
MRC1	TTHERM_00338320	IP_MRC1-S-3|IP_MRC1-S-2|IP_MRC1-S-1|IP_MRC1-CO-2|IP_MRC1-CO-1|IP_MRC1-C-1	0|11|3|0|8|0	22	6	0.18	0.00|0.92|0.00|0.00|0.23|0.00	5	0.1925	0.925	0.6756
MTA	TTHERM_01337390	IP_AHA-S-2|IP_AHA-S-1|IP_AHA-CO-2|IP_AHA-CO-1|IP_AHA-C-3|IP_AHA-C-2|IP_AHA-C-1	0|1|0|0|3|0|0	4	7	0.22	0.00|0.59|0.00|0.00|0.89|0.00|0.00	0	0.2111	0.8875	0.6764
MRC1	TTHERM_00160750	IP_MRC1-S-3|IP_MRC1-S-2|IP_MRC1-S-1|IP_MRC1-CO-2|IP_MRC1-CO-1|IP_MRC1-C-1	0|1|0|0|4|0	5	6	0.14	0.00|0.34|0.00|0.00|0.81|0.00	0	0.1917	0.8125	0.6766
MTA	TTHERM_01104920	IP_AHA-S-2|IP_AHA-S-1|IP_AHA-CO-2|IP_AHA-CO-1|IP_AHA-C-3|IP_AHA-C-2|IP_AHA-C-1	0|1|3|0|0|0|0	4	7	0.19	0.00|0.62|0.85|0.00|0.00|0.00|0.00	0	0.21	0.85	0.6775
MRC1	TTHERM_00392720	IP_MRC1-S-3|IP_MRC1-S-2|IP_MRC1-S-1|IP_MRC1-CO-2|IP_MRC1-CO-1|IP_MRC1-C-1	0|0|0|0|3|1	4	6	0.21	0.00|0.00|0.00|0.00|0.70|0.45	0	0.1912	0.6975	0.6775
MRC1	TTHERM_01054220	IP_MRC1-S-3|IP_MRC1-S-2|IP_MRC1-S-1|IP_MRC1-CO-2|IP_MRC1-CO-1|IP_MRC1-C-1	0|1|0|0|3|0	4	6	0.19	0.00|0.35|0.00|0.00|0.79|0.00	0	0.1904	0.79	0.6794
MRC1	TTHERM_00965370	IP_MRC1-S-3|IP_MRC1-S-2|IP_MRC1-S-1|IP_MRC1-CO-2|IP_MRC1-CO-1|IP_MRC1-C-1	0|0|1|0|2|0	3	6	0.18	0.00|0.00|0.48|0.00|0.66|0.00	0	0.1904	0.6575	0.6794
MTA	TTHERM_000364298	IP_AHA-S-2|IP_AHA-S-1|IP_AHA-CO-2|IP_AHA-CO-1|IP_AHA-C-3|IP_AHA-C-2|IP_AHA-C-1	0|0|0|2|0|5|0	7	7	0.21	0.00|0.00|0.00|0.56|0.00|0.90|0.00	0	0.2096	0.9025	0.6796
MTA	TTHERM_00074300	IP_AHA-S-2|IP_AHA-S-1|IP_AHA-CO-2|IP_AHA-CO-1|IP_AHA-C-3|IP_AHA-C-2|IP_AHA-C-1	0|1|3|0|0|0|0	4	7	0.21	0.00|0.61|0.86|0.00|0.00|0.00|0.00	0	0.2096	0.86	0.6796
MRC1	TTHERM_00925320	IP_MRC1-S-3|IP_MRC1-S-2|IP_MRC1-S-1|IP_MRC1-CO-2|IP_MRC1-CO-1|IP_MRC1-C-1	4|0|1|0|0|3	8	6	0.21	0.97|0.00|0.00|0.00|0.00|0.16	2	0.1887	0.9675	0.6804
MTA	TTHERM_00538790	IP_AHA-S-2|IP_AHA-S-1|IP_AHA-CO-2|IP_AHA-CO-1|IP_AHA-C-3|IP_AHA-C-2|IP_AHA-C-1	0|0|9|0|1|0|0	10	7	0.23	0.00|0.00|0.98|0.00|0.48|0.00|0.00	0	0.2096	0.985	0.6806
MRC1	TTHERM_00387120	IP_MRC1-S-3|IP_MRC1-S-2|IP_MRC1-S-1|IP_MRC1-CO-2|IP_MRC1-CO-1|IP_MRC1-C-1	0|2|1|0|0|0	3	6	0.17	0.00|0.68|0.45|0.00|0.00|0.00	0	0.1883	0.675	0.6813
MRC1	TTHERM_00684580	IP_MRC1-S-3|IP_MRC1-S-2|IP_MRC1-S-1|IP_MRC1-CO-2|IP_MRC1-CO-1|IP_MRC1-C-1	2|0|0|0|0|1	3	6	0.19	0.68|0.00|0.00|0.00|0.00|0.45	0	0.1879	0.6775	0.6822
MTA	TTHERM_00047700	IP_AHA-S-2|IP_AHA-S-1|IP_AHA-CO-2|IP_AHA-CO-1|IP_AHA-C-3|IP_AHA-C-2|IP_AHA-C-1	0|1|0|0|18|0|0	19	7	0.22	0.00|0.49|0.00|0.00|0.97|0.00|0.00	0	0.2082	0.9675	0.6826
MTA	TTHERM_00049060	IP_AHA-S-2|IP_AHA-S-1|IP_AHA-CO-2|IP_AHA-CO-1|IP_AHA-C-3|IP_AHA-C-2|IP_AHA-C-1	0|1|3|0|0|0|0	4	7	0.19	0.00|0.63|0.83|0.00|0.00|0.00|0.00	0	0.2082	0.8275	0.6826
MRC1	TTHERM_00188800	IP_MRC1-S-3|IP_MRC1-S-2|IP_MRC1-S-1|IP_MRC1-CO-2|IP_MRC1-CO-1|IP_MRC1-C-1	0|0|0|2|1|0	3	6	0.2	0.00|0.00|0.00|0.79|0.33|0.00	0	0.1875	0.79	0.6831
MRC1	TTHERM_00526400	IP_MRC1-S-3|IP_MRC1-S-2|IP_MRC1-S-1|IP_MRC1-CO-2|IP_MRC1-CO-1|IP_MRC1-C-1	0|0|1|0|2|0	3	6	0.19	0.00|0.00|0.46|0.00|0.66|0.00	0	0.1871	0.665	0.684
MTA	TTHERM_00725990	IP_AHA-S-2|IP_AHA-S-1|IP_AHA-CO-2|IP_AHA-CO-1|IP_AHA-C-3|IP_AHA-C-2|IP_AHA-C-1	0|1|0|0|0|3|0	4	7	0.2	0.00|0.58|0.00|0.00|0.00|0.87|0.00	0	0.2079	0.8725	0.6845
MTA	TTHERM_00696910	IP_AHA-S-2|IP_AHA-S-1|IP_AHA-CO-2|IP_AHA-CO-1|IP_AHA-C-3|IP_AHA-C-2|IP_AHA-C-1	0|5|0|2|6|2|3	18	7	0.21	0.00|0.56|0.00|0.00|0.76|0.00|0.13	3	0.2079	0.7625	0.6845
MTA	TTHERM_00583460	IP_AHA-S-2|IP_AHA-S-1|IP_AHA-CO-2|IP_AHA-CO-1|IP_AHA-C-3|IP_AHA-C-2|IP_AHA-C-1	0|1|0|0|2|0|0	3	7	0.19	0.00|0.62|0.00|0.00|0.83|0.00|0.00	0	0.2075	0.835	0.6854
MRC1	TTHERM_00318820	IP_MRC1-S-3|IP_MRC1-S-2|IP_MRC1-S-1|IP_MRC1-CO-2|IP_MRC1-CO-1|IP_MRC1-C-1	0|1|0|0|3|0	4	6	0.19	0.00|0.35|0.00|0.00|0.76|0.00	0	0.1858	0.765	0.6858
MRC1	TTHERM_00532600	IP_MRC1-S-3|IP_MRC1-S-2|IP_MRC1-S-1|IP_MRC1-CO-2|IP_MRC1-CO-1|IP_MRC1-C-1	0|1|0|0|2|0	3	6	0.2	0.00|0.40|0.00|0.00|0.71|0.00	0	0.1858	0.715	0.6858
MTA	TTHERM_00715750	IP_AHA-S-2|IP_AHA-S-1|IP_AHA-CO-2|IP_AHA-CO-1|IP_AHA-C-3|IP_AHA-C-2|IP_AHA-C-1	0|5|0|0|1|0|0	6	7	0.2	0.00|0.90|0.00|0.00|0.54|0.00|0.00	0	0.2061	0.9025	0.6864
MRC1	TTHERM_01005320	IP_MRC1-S-3|IP_MRC1-S-2|IP_MRC1-S-1|IP_MRC1-CO-2|IP_MRC1-CO-1|IP_MRC1-C-1	0|1|0|0|3|0	4	6	0.19	0.00|0.38|0.00|0.00|0.73|0.00	0	0.1854	0.735	0.6866
MTA	TTHERM_000131339	IP_AHA-S-2|IP_AHA-S-1|IP_AHA-CO-2|IP_AHA-CO-1|IP_AHA-C-3|IP_AHA-C-2|IP_AHA-C-1	1|0|2|0|0|0|0	3	7	0.19	0.66|0.00|0.78|0.00|0.00|0.00|0.00	0	0.2057	0.78	0.6873
MRC1	TTHERM_00112700	IP_MRC1-S-3|IP_MRC1-S-2|IP_MRC1-S-1|IP_MRC1-CO-2|IP_MRC1-CO-1|IP_MRC1-C-1	0|0|1|0|2|0	3	6	0.2	0.00|0.00|0.49|0.00|0.60|0.00	0	0.1833	0.605	0.6875
MTA	TTHERM_00579030	IP_AHA-S-2|IP_AHA-S-1|IP_AHA-CO-2|IP_AHA-CO-1|IP_AHA-C-3|IP_AHA-C-2|IP_AHA-C-1	0|1|0|0|2|0|0	3	7	0.17	0.00|0.60|0.00|0.00|0.83|0.00|0.00	0	0.205	0.83	0.6882
MRC1	TTHERM_00194240	IP_MRC1-S-3|IP_MRC1-S-2|IP_MRC1-S-1|IP_MRC1-CO-2|IP_MRC1-CO-1|IP_MRC1-C-1	0|0|0|2|1|0	3	6	0.15	0.00|0.00|0.00|0.75|0.33|0.00	0	0.1812	0.755	0.6884
MTA	TTHERM_00657270	IP_AHA-S-2|IP_AHA-S-1|IP_AHA-CO-2|IP_AHA-CO-1|IP_AHA-C-3|IP_AHA-C-2|IP_AHA-C-1	0|0|8|0|5|1|0	14	7	0.25	0.00|0.00|0.95|0.00|0.47|0.00|0.00	3	0.2043	0.955	0.6891
MRC1	TTHERM_00614680	IP_MRC1-S-3|IP_MRC1-S-2|IP_MRC1-S-1|IP_MRC1-CO-2|IP_MRC1-CO-1|IP_MRC1-C-1	0|2|0|0|1|0	3	6	0.21	0.00|0.73|0.00|0.00|0.35|0.00	0	0.1808	0.7325	0.6892
MRC1	TTHERM_00492850	IP_MRC1-S-3|IP_MRC1-S-2|IP_MRC1-S-1|IP_MRC1-CO-2|IP_MRC1-CO-1|IP_MRC1-C-1	0|0|0|4|0|8	12	6	0.18	0.00|0.00|0.00|0.09|0.00|0.99	3	0.1804	0.99	0.6901
MTA	TTHERM_00408950	IP_AHA-S-2|IP_AHA-S-1|IP_AHA-CO-2|IP_AHA-CO-1|IP_AHA-C-3|IP_AHA-C-2|IP_AHA-C-1	0|0|5|0|0|1|0	6	7	0.19	0.00|0.00|0.92|0.00|0.00|0.50|0.00	0	0.2039	0.9225	0.6909
MTA	TTHERM_00589930	IP_AHA-S-2|IP_AHA-S-1|IP_AHA-CO-2|IP_AHA-CO-1|IP_AHA-C-3|IP_AHA-C-2|IP_AHA-C-1	1|0|2|0|0|0|0	3	7	0.24	0.69|0.00|0.74|0.00|0.00|0.00|0.00	0	0.2039	0.74	0.6909
MRC1	TTHERM_00392800	IP_MRC1-S-3|IP_MRC1-S-2|IP_MRC1-S-1|IP_MRC1-CO-2|IP_MRC1-CO-1|IP_MRC1-C-1	0|1|0|0|2|0	3	6	0.19	0.00|0.38|0.00|0.00|0.70|0.00	0	0.1792	0.7	0.691
MTA	TTHERM_00492990	IP_AHA-S-2|IP_AHA-S-1|IP_AHA-CO-2|IP_AHA-CO-1|IP_AHA-C-3|IP_AHA-C-2|IP_AHA-C-1	0|1|0|0|2|0|0	3	7	0.2	0.00|0.59|0.00|0.00|0.83|0.00|0.00	0	0.2036	0.83	0.6917
MRC1	TTHERM_00455100	IP_MRC1-S-3|IP_MRC1-S-2|IP_MRC1-S-1|IP_MRC1-CO-2|IP_MRC1-CO-1|IP_MRC1-C-1	0|2|0|0|1|0	3	6	0.2	0.00|0.71|0.00|0.00|0.36|0.00	0	0.1787	0.715	0.6918
MTA	TTHERM_00138430	IP_AHA-S-2|IP_AHA-S-1|IP_AHA-CO-2|IP_AHA-CO-1|IP_AHA-C-3|IP_AHA-C-2|IP_AHA-C-1	0|0|4|0|1|0|0	5	7	0.21	0.00|0.00|0.87|0.00|0.55|0.00|0.00	0	0.2021	0.8675	0.6926
MRC1	TTHERM_00693060	IP_MRC1-S-3|IP_MRC1-S-2|IP_MRC1-S-1|IP_MRC1-CO-2|IP_MRC1-CO-1|IP_MRC1-C-1	0|0|0|0|1|2	3	6	0.16	0.00|0.00|0.00|0.00|0.31|0.75	0	0.1767	0.7475	0.6927
MTA	TTHERM_00218470	IP_AHA-S-2|IP_AHA-S-1|IP_AHA-CO-2|IP_AHA-CO-1|IP_AHA-C-3|IP_AHA-C-2|IP_AHA-C-1	0|1|0|0|5|0|0	6	7	0.19	0.00|0.54|0.00|0.00|0.87|0.00|0.00	0	0.2021	0.8725	0.6934
MRC1	TTHERM_00585230	IP_MRC1-S-3|IP_MRC1-S-2|IP_MRC1-S-1|IP_MRC1-CO-2|IP_MRC1-CO-1|IP_MRC1-C-1	0|1|0|0|2|0	3	6	0.19	0.00|0.38|0.00|0.00|0.66|0.00	0	0.175	0.665	0.6935
MRC1	TTHERM_00143770	IP_MRC1-S-3|IP_MRC1-S-2|IP_MRC1-S-1|IP_MRC1-CO-2|IP_MRC1-CO-1|IP_MRC1-C-1	0|2|0|0|1|0	3	6	0.16	0.00|0.71|0.00|0.00|0.33|0.00	0	0.1742	0.715	0.6952
MRC1	TTHERM_00499350	IP_MRC1-S-3|IP_MRC1-S-2|IP_MRC1-S-1|IP_MRC1-CO-2|IP_MRC1-CO-1|IP_MRC1-C-1	0|1|0|0|2|0	3	6	0.17	0.00|0.35|0.00|0.00|0.69|0.00	0	0.1742	0.6925	0.6952
MRC1	TTHERM_00989460	IP_MRC1-S-3|IP_MRC1-S-2|IP_MRC1-S-1|IP_MRC1-CO-2|IP_MRC1-CO-1|IP_MRC1-C-1	0|1|0|0|2|0	3	6	0.16	0.00|0.39|0.00|0.00|0.64|0.00	0	0.1725	0.645	0.696
MTA	TTHERM_00160750	IP_AHA-S-2|IP_AHA-S-1|IP_AHA-CO-2|IP_AHA-CO-1|IP_AHA-C-3|IP_AHA-C-2|IP_AHA-C-1	0|0|3|0|0|1|0	4	7	0.17	0.00|0.00|0.88|0.00|0.00|0.53|0.00	0	0.2018	0.885	0.6967
MTA	TTHERM_00649100	IP_AHA-S-2|IP_AHA-S-1|IP_AHA-CO-2|IP_AHA-CO-1|IP_AHA-C-3|IP_AHA-C-2|IP_AHA-C-1	0|0|3|0|1|0|0	4	7	0.22	0.00|0.00|0.86|0.00|0.55|0.00|0.00	0	0.2018	0.8625	0.6967
MTA	TTHERM_00582140	IP_AHA-S-2|IP_AHA-S-1|IP_AHA-CO-2|IP_AHA-CO-1|IP_AHA-C-3|IP_AHA-C-2|IP_AHA-C-1	0|1|0|0|2|0|0	3	7	0.16	0.00|0.58|0.00|0.00|0.83|0.00|0.00	0	0.2018	0.8275	0.6967
MTA	TTHERM_00997720	IP_AHA-S-2|IP_AHA-S-1|IP_AHA-CO-2|IP_AHA-CO-1|IP_AHA-C-3|IP_AHA-C-2|IP_AHA-C-1	0|1|0|0|2|0|0	3	7	0.17	0.00|0.59|0.00|0.00|0.82|0.00|0.00	0	0.2018	0.825	0.6967
MRC1	TTHERM_00332200	IP_MRC1-S-3|IP_MRC1-S-2|IP_MRC1-S-1|IP_MRC1-CO-2|IP_MRC1-CO-1|IP_MRC1-C-1	0|1|0|0|2|0	3	6	0.18	0.00|0.34|0.00|0.00|0.68|0.00	0	0.1713	0.6825	0.6968
MTA	TTHERM_00155330	IP_AHA-S-2|IP_AHA-S-1|IP_AHA-CO-2|IP_AHA-CO-1|IP_AHA-C-3|IP_AHA-C-2|IP_AHA-C-1	0|1|2|0|0|0|0	3	7	0.17	0.00|0.64|0.76|0.00|0.00|0.00|0.00	0	0.2014	0.765	0.6975
MRC1	TTHERM_00443010	IP_MRC1-S-3|IP_MRC1-S-2|IP_MRC1-S-1|IP_MRC1-CO-2|IP_MRC1-CO-1|IP_MRC1-C-1	0|2|0|0|1|0	3	6	0.14	0.00|0.66|0.00|0.00|0.34|0.00	0	0.1679	0.665	0.6977
MTA	TTHERM_00837950	IP_AHA-S-2|IP_AHA-S-1|IP_AHA-CO-2|IP_AHA-CO-1|IP_AHA-C-3|IP_AHA-C-2|IP_AHA-C-1	0|0|14|0|0|1|0	15	7	0.19	0.00|0.00|0.98|0.00|0.00|0.42|0.00	0	0.2011	0.9825	0.6983
MRC1	TTHERM_00079300	IP_MRC1-S-3|IP_MRC1-S-2|IP_MRC1-S-1|IP_MRC1-CO-2|IP_MRC1-CO-1|IP_MRC1-C-1	0|1|0|22|1|3	27	6	0.19	0.00|0.00|0.00|1.00|0.00|0.00	7	0.1667	1	0.6985
MTA	TTHERM_00627000	IP_AHA-S-2|IP_AHA-S-1|IP_AHA-CO-2|IP_AHA-CO-1|IP_AHA-C-3|IP_AHA-C-2|IP_AHA-C-1	0|0|5|0|0|1|0	6	7	0.19	0.00|0.00|0.91|0.00|0.00|0.50|0.00	0	0.2007	0.9075	0.6991
MTA	TTHERM_00263380	IP_AHA-S-2|IP_AHA-S-1|IP_AHA-CO-2|IP_AHA-CO-1|IP_AHA-C-3|IP_AHA-C-2|IP_AHA-C-1	0|1|2|0|0|0|0	3	7	0.19	0.00|0.66|0.74|0.00|0.00|0.00|0.00	0	0.1996	0.7375	0.6998
MTA	TTHERM_00522650	IP_AHA-S-2|IP_AHA-S-1|IP_AHA-CO-2|IP_AHA-CO-1|IP_AHA-C-3|IP_AHA-C-2|IP_AHA-C-1	0|0|8|0|0|1|0	9	7	0.21	0.00|0.00|0.93|0.00|0.00|0.46|0.00	0	0.1989	0.9325	0.7013
MTA	TTHERM_00420000	IP_AHA-S-2|IP_AHA-S-1|IP_AHA-CO-2|IP_AHA-CO-1|IP_AHA-C-3|IP_AHA-C-2|IP_AHA-C-1	0|1|2|0|0|0|0	3	7	0.23	0.00|0.63|0.76|0.00|0.00|0.00|0.00	0	0.1989	0.76	0.7013
MTA	TTHERM_00160690	IP_AHA-S-2|IP_AHA-S-1|IP_AHA-CO-2|IP_AHA-CO-1|IP_AHA-C-3|IP_AHA-C-2|IP_AHA-C-1	1|0|2|0|0|0|0	3	7	0.18	0.66|0.00|0.73|0.00|0.00|0.00|0.00	0	0.1986	0.7275	0.7021
MRC1	TTHERM_00434040	IP_MRC1-S-3|IP_MRC1-S-2|IP_MRC1-S-1|IP_MRC1-CO-2|IP_MRC1-CO-1|IP_MRC1-C-1	0|9|4|3|28|2	46	6	0.16	0.00|0.00|0.00|0.00|1.00|0.00	8	0.1658	0.995	0.7026
MRC1	TTHERM_01141570	IP_MRC1-S-3|IP_MRC1-S-2|IP_MRC1-S-1|IP_MRC1-CO-2|IP_MRC1-CO-1|IP_MRC1-C-1	0|4|0|2|2|13	21	6	0.19	0.00|0.00|0.00|0.00|0.00|1.00	4	0.1658	0.995	0.7026
MRC1	TTHERM_00046640	IP_MRC1-S-3|IP_MRC1-S-2|IP_MRC1-S-1|IP_MRC1-CO-2|IP_MRC1-CO-1|IP_MRC1-C-1	0|0|0|9|0|1	10	6	0.17	0.00|0.00|0.00|1.00|0.00|0.00	3	0.1658	0.995	0.7026
MRC1	TTHERM_00138150	IP_MRC1-S-3|IP_MRC1-S-2|IP_MRC1-S-1|IP_MRC1-CO-2|IP_MRC1-CO-1|IP_MRC1-C-1	0|38|3|0|24|2	67	6	0.17	0.00|0.99|0.00|0.00|0.00|0.00	15	0.1658	0.9925	0.7026
MRC1	TTHERM_00961950	IP_MRC1-S-3|IP_MRC1-S-2|IP_MRC1-S-1|IP_MRC1-CO-2|IP_MRC1-CO-1|IP_MRC1-C-1	0|10|0|25|8|8	51	6	0.16	0.00|0.00|0.00|0.99|0.00|0.00	7	0.1658	0.9925	0.7026
MTA	TTHERM_00156690	IP_AHA-S-2|IP_AHA-S-1|IP_AHA-CO-2|IP_AHA-CO-1|IP_AHA-C-3|IP_AHA-C-2|IP_AHA-C-1	0|0|0|0|2|0|1	3	7	0.2	0.00|0.00|0.00|0.00|0.82|0.00|0.57	0	0.1982	0.82	0.7028
MTA	TTHERM_00856430	IP_AHA-S-2|IP_AHA-S-1|IP_AHA-CO-2|IP_AHA-CO-1|IP_AHA-C-3|IP_AHA-C-2|IP_AHA-C-1	0|0|0|0|1|3|0	4	7	0.17	0.00|0.00|0.00|0.00|0.52|0.86|0.00	0	0.1982	0.8625	0.7035
MRC1	TTHERM_00431340	IP_MRC1-S-3|IP_MRC1-S-2|IP_MRC1-S-1|IP_MRC1-CO-2|IP_MRC1-CO-1|IP_MRC1-C-1	0|0|0|6|0|0	6	6	0.15	0.00|0.00|0.00|0.99|0.00|0.00	2	0.1654	0.9925	0.7041
MRC1	TTHERM_00624730	IP_MRC1-S-3|IP_MRC1-S-2|IP_MRC1-S-1|IP_MRC1-CO-2|IP_MRC1-CO-1|IP_MRC1-C-1	0|0|8|0|0|0	8	6	0.14	0.00|0.00|0.99|0.00|0.00|0.00	2	0.1654	0.9925	0.7041
MTA	TTHERM_00419850	IP_AHA-S-2|IP_AHA-S-1|IP_AHA-CO-2|IP_AHA-CO-1|IP_AHA-C-3|IP_AHA-C-2|IP_AHA-C-1	0|0|11|0|0|1|0	12	7	0.19	0.00|0.00|0.98|0.00|0.00|0.41|0.00	0	0.1979	0.9775	0.7042
MRC1	TTHERM_00079910	IP_MRC1-S-3|IP_MRC1-S-2|IP_MRC1-S-1|IP_MRC1-CO-2|IP_MRC1-CO-1|IP_MRC1-C-1	0|0|0|8|0|0	8	6	0.19	0.00|0.00|0.00|0.99|0.00|0.00	3	0.165	0.99	0.7049
MTA	TTHERM_00997780	IP_AHA-S-2|IP_AHA-S-1|IP_AHA-CO-2|IP_AHA-CO-1|IP_AHA-C-3|IP_AHA-C-2|IP_AHA-C-1	0|0|0|0|8|1|0	9	7	0.21	0.00|0.00|0.00|0.00|0.95|0.43|0.00	0	0.1971	0.9475	0.7057
MTA	TTHERM_00095500	IP_AHA-S-2|IP_AHA-S-1|IP_AHA-CO-2|IP_AHA-CO-1|IP_AHA-C-3|IP_AHA-C-2|IP_AHA-C-1	0|0|1|0|5|0|0	6	7	0.24	0.00|0.00|0.43|0.00|0.95|0.00|0.00	0	0.1971	0.9475	0.7057
MRC1	TTHERM_00105580	IP_MRC1-S-3|IP_MRC1-S-2|IP_MRC1-S-1|IP_MRC1-CO-2|IP_MRC1-CO-1|IP_MRC1-C-1	0|1|0|0|2|0	3	6	0.16	0.00|0.34|0.00|0.00|0.64|0.00	0	0.1646	0.645	0.7057
MRC1	TTHERM_00339620	IP_MRC1-S-3|IP_MRC1-S-2|IP_MRC1-S-1|IP_MRC1-CO-2|IP_MRC1-CO-1|IP_MRC1-C-1	0|0|0|0|20|0	20	6	0.14	0.00|0.00|0.00|0.00|0.98|0.00	0	0.1642	0.985	0.7064
MTA	TTHERM_01054220	IP_AHA-S-2|IP_AHA-S-1|IP_AHA-CO-2|IP_AHA-CO-1|IP_AHA-C-3|IP_AHA-C-2|IP_AHA-C-1	0|0|8|0|0|1|0	9	7	0.2	0.00|0.00|0.93|0.00|0.00|0.44|0.00	0	0.1954	0.9325	0.7071
MTA	TTHERM_00655560	IP_AHA-S-2|IP_AHA-S-1|IP_AHA-CO-2|IP_AHA-CO-1|IP_AHA-C-3|IP_AHA-C-2|IP_AHA-C-1	0|0|3|0|0|1|0	4	7	0.2	0.00|0.00|0.88|0.00|0.00|0.48|0.00	0	0.1954	0.8825	0.7071
MTA	TTHERM_00140980	IP_AHA-S-2|IP_AHA-S-1|IP_AHA-CO-2|IP_AHA-CO-1|IP_AHA-C-3|IP_AHA-C-2|IP_AHA-C-1	0|0|12|0|0|1|0	13	7	0.2	0.00|0.00|0.97|0.00|0.00|0.39|0.00	0	0.195	0.9725	0.7084
MTA	TTHERM_00697420	IP_AHA-S-2|IP_AHA-S-1|IP_AHA-CO-2|IP_AHA-CO-1|IP_AHA-C-3|IP_AHA-C-2|IP_AHA-C-1	0|0|7|0|0|1|0	8	7	0.21	0.00|0.00|0.91|0.00|0.00|0.46|0.00	0	0.195	0.9075	0.7084
MTA	TTHERM_00467850	IP_AHA-S-2|IP_AHA-S-1|IP_AHA-CO-2|IP_AHA-CO-1|IP_AHA-C-3|IP_AHA-C-2|IP_AHA-C-1	0|1|2|0|0|0|0	3	7	0.19	0.00|0.59|0.77|0.00|0.00|0.00|0.00	0	0.1943	0.7675	0.7091
MRC1	TTHERM_00943010	IP_MRC1-S-3|IP_MRC1-S-2|IP_MRC1-S-1|IP_MRC1-CO-2|IP_MRC1-CO-1|IP_MRC1-C-1	0|6|4|0|21|0	31	6	0.14	0.00|0.00|0.00|0.00|0.98|0.00	8	0.1637	0.9825	0.7094
MRC1	TTHERM_00813040	IP_MRC1-S-3|IP_MRC1-S-2|IP_MRC1-S-1|IP_MRC1-CO-2|IP_MRC1-CO-1|IP_MRC1-C-1	0|3|1|18|3|4	29	6	0.15	0.00|0.00|0.00|0.98|0.00|0.00	9	0.1637	0.9825	0.7094
MRC1	TTHERM_00529660	IP_MRC1-S-3|IP_MRC1-S-2|IP_MRC1-S-1|IP_MRC1-CO-2|IP_MRC1-CO-1|IP_MRC1-C-1	0|0|0|6|0|0	6	6	0.12	0.00|0.00|0.00|0.98|0.00|0.00	2	0.1637	0.9825	0.7094
MRC1	TTHERM_00442960	IP_MRC1-S-3|IP_MRC1-S-2|IP_MRC1-S-1|IP_MRC1-CO-2|IP_MRC1-CO-1|IP_MRC1-C-1	0|2|0|0|1|0	3	6	0.17	0.00|0.70|0.00|0.00|0.28|0.00	0	0.1637	0.705	0.7094
MRC1	TTHERM_00318570	IP_MRC1-S-3|IP_MRC1-S-2|IP_MRC1-S-1|IP_MRC1-CO-2|IP_MRC1-CO-1|IP_MRC1-C-1	0|17|4|0|7|4	32	6	0.17	0.00|0.98|0.00|0.00|0.00|0.00	7	0.1633	0.98	0.7101
MTA	TTHERM_00313610	IP_AHA-S-2|IP_AHA-S-1|IP_AHA-CO-2|IP_AHA-CO-1|IP_AHA-C-3|IP_AHA-C-2|IP_AHA-C-1	0|0|5|0|0|1|0	6	7	0.22	0.00|0.00|0.89|0.00|0.00|0.47|0.00	0	0.1936	0.8875	0.7104
MTA	TTHERM_00989460	IP_AHA-S-2|IP_AHA-S-1|IP_AHA-CO-2|IP_AHA-CO-1|IP_AHA-C-3|IP_AHA-C-2|IP_AHA-C-1	0|0|3|0|0|1|0	4	7	0.24	0.00|0.00|0.86|0.00|0.00|0.49|0.00	0	0.1936	0.8625	0.7104
MTA	TTHERM_00157810	IP_AHA-S-2|IP_AHA-S-1|IP_AHA-CO-2|IP_AHA-CO-1|IP_AHA-C-3|IP_AHA-C-2|IP_AHA-C-1	0|0|3|0|0|1|0	4	7	0.18	0.00|0.00|0.86|0.00|0.00|0.48|0.00	0	0.1914	0.86	0.7111
MTA	TTHERM_00194710	IP_AHA-S-2|IP_AHA-S-1|IP_AHA-CO-2|IP_AHA-CO-1|IP_AHA-C-3|IP_AHA-C-2|IP_AHA-C-1	0|0|3|0|0|1|0	4	7	0.19	0.00|0.00|0.85|0.00|0.00|0.48|0.00	0	0.1904	0.855	0.7117
MRC1	TTHERM_00499440	IP_MRC1-S-3|IP_MRC1-S-2|IP_MRC1-S-1|IP_MRC1-CO-2|IP_MRC1-CO-1|IP_MRC1-C-1	0|34|11|8|72|2	127	6	0.18	0.00|0.00|0.00|0.00|0.98|0.00	31	0.1629	0.9775	0.7122
MRC1	TTHERM_01019590	IP_MRC1-S-3|IP_MRC1-S-2|IP_MRC1-S-1|IP_MRC1-CO-2|IP_MRC1-CO-1|IP_MRC1-C-1	0|2|0|0|1|0	3	6	0.16	0.00|0.69|0.00|0.00|0.28|0.00	0	0.1629	0.695	0.7122
MRC1	TTHERM_00853090	IP_MRC1-S-3|IP_MRC1-S-2|IP_MRC1-S-1|IP_MRC1-CO-2|IP_MRC1-CO-1|IP_MRC1-C-1	0|1|0|0|2|0	3	6	0.16	0.00|0.36|0.00|0.00|0.62|0.00	0	0.1629	0.615	0.7122
MTA	TTHERM_00266690	IP_AHA-S-2|IP_AHA-S-1|IP_AHA-CO-2|IP_AHA-CO-1|IP_AHA-C-3|IP_AHA-C-2|IP_AHA-C-1	3|0|0|0|0|1|0	4	7	0.19	0.83|0.00|0.00|0.00|0.00|0.50|0.00	0	0.1896	0.8275	0.7124
MRC1	TTHERM_00140940	IP_MRC1-S-3|IP_MRC1-S-2|IP_MRC1-S-1|IP_MRC1-CO-2|IP_MRC1-CO-1|IP_MRC1-C-1	0|1|0|0|2|0	3	6	0.15	0.00|0.36|0.00|0.00|0.61|0.00	0	0.1625	0.61	0.7129
MTA	TTHERM_00390040	IP_AHA-S-2|IP_AHA-S-1|IP_AHA-CO-2|IP_AHA-CO-1|IP_AHA-C-3|IP_AHA-C-2|IP_AHA-C-1	0|1|2|0|0|0|0	3	7	0.18	0.00|0.59|0.73|0.00|0.00|0.00|0.00	0	0.1896	0.735	0.713
MTA	TTHERM_01084100	IP_AHA-S-2|IP_AHA-S-1|IP_AHA-CO-2|IP_AHA-CO-1|IP_AHA-C-3|IP_AHA-C-2|IP_AHA-C-1	0|0|1|0|4|0|0	5	7	0.17	0.00|0.00|0.41|0.00|0.91|0.00|0.00	0	0.1882	0.9125	0.7143
MTA	TTHERM_00133440	IP_AHA-S-2|IP_AHA-S-1|IP_AHA-CO-2|IP_AHA-CO-1|IP_AHA-C-3|IP_AHA-C-2|IP_AHA-C-1	0|0|3|0|0|1|0	4	7	0.19	0.00|0.00|0.86|0.00|0.00|0.46|0.00	0	0.1882	0.8575	0.7143
MTA	TTHERM_00785870	IP_AHA-S-2|IP_AHA-S-1|IP_AHA-CO-2|IP_AHA-CO-1|IP_AHA-C-3|IP_AHA-C-2|IP_AHA-C-1	0|0|4|0|0|1|0	5	7	0.18	0.00|0.00|0.86|0.00|0.00|0.45|0.00	0	0.1875	0.8625	0.7156
MTA	TTHERM_00086970	IP_AHA-S-2|IP_AHA-S-1|IP_AHA-CO-2|IP_AHA-CO-1|IP_AHA-C-3|IP_AHA-C-2|IP_AHA-C-1	0|0|2|0|1|0|0	3	7	0.21	0.00|0.00|0.75|0.00|0.57|0.00|0.00	0	0.1875	0.745	0.7156
MRC1	TTHERM_00149630	IP_MRC1-S-3|IP_MRC1-S-2|IP_MRC1-S-1|IP_MRC1-CO-2|IP_MRC1-CO-1|IP_MRC1-C-1	1|9|4|3|20|3	40	6	0.18	0.00|0.00|0.00|0.00|0.97|0.00	9	0.1612	0.9675	0.7156
MRC1	TTHERM_00456800	IP_MRC1-S-3|IP_MRC1-S-2|IP_MRC1-S-1|IP_MRC1-CO-2|IP_MRC1-CO-1|IP_MRC1-C-1	1|6|0|1|13|2	23	6	0.18	0.00|0.00|0.00|0.00|0.96|0.00	5	0.1612	0.965	0.7156
MRC1	TTHERM_00069210	IP_MRC1-S-3|IP_MRC1-S-2|IP_MRC1-S-1|IP_MRC1-CO-2|IP_MRC1-CO-1|IP_MRC1-C-1	0|8|2|0|4|0	14	6	0.17	0.00|0.96|0.00|0.00|0.00|0.00	3	0.1612	0.9625	0.7156
MRC1	TTHERM_01212860	IP_MRC1-S-3|IP_MRC1-S-2|IP_MRC1-S-1|IP_MRC1-CO-2|IP_MRC1-CO-1|IP_MRC1-C-1	0|2|0|0|1|0	3	6	0.14	0.00|0.64|0.00|0.00|0.33|0.00	0	0.1612	0.6375	0.7156
MTA	TTHERM_00361370	IP_AHA-S-2|IP_AHA-S-1|IP_AHA-CO-2|IP_AHA-CO-1|IP_AHA-C-3|IP_AHA-C-2|IP_AHA-C-1	0|3|0|0|0|1|0	4	7	0.16	0.00|0.85|0.00|0.00|0.00|0.45|0.00	0	0.1868	0.855	0.7162
MRC1	TTHERM_00475080	IP_MRC1-S-3|IP_MRC1-S-2|IP_MRC1-S-1|IP_MRC1-CO-2|IP_MRC1-CO-1|IP_MRC1-C-1	0|0|0|0|0|5	5	6	0.18	0.00|0.00|0.00|0.00|0.00|0.95	2	0.1592	0.955	0.7163
MTA	TTHERM_00773400	IP_AHA-S-2|IP_AHA-S-1|IP_AHA-CO-2|IP_AHA-CO-1|IP_AHA-C-3|IP_AHA-C-2|IP_AHA-C-1	0|0|1|0|3|0|0	4	7	0.21	0.00|0.00|0.39|0.00|0.91|0.00|0.00	0	0.1864	0.91	0.7168
MRC1	TTHERM_00361830	IP_MRC1-S-3|IP_MRC1-S-2|IP_MRC1-S-1|IP_MRC1-CO-2|IP_MRC1-CO-1|IP_MRC1-C-1	0|20|0|0|0|0	20	6	0.16	0.00|0.95|0.00|0.00|0.00|0.00	0	0.1583	0.95	0.717
MTA	TTHERM_00392720	IP_AHA-S-2|IP_AHA-S-1|IP_AHA-CO-2|IP_AHA-CO-1|IP_AHA-C-3|IP_AHA-C-2|IP_AHA-C-1	2|0|0|0|0|1|0	3	7	0.19	0.79|0.00|0.00|0.00|0.00|0.50|0.00	0	0.1839	0.7875	0.7175
MRC1	TTHERM_001035531	IP_MRC1-S-3|IP_MRC1-S-2|IP_MRC1-S-1|IP_MRC1-CO-2|IP_MRC1-CO-1|IP_MRC1-C-1	0|1|0|0|2|0	3	6	0.14	0.00|0.33|0.00|0.00|0.62|0.00	0	0.1579	0.62	0.7176
MTA	TTHERM_01093500	IP_AHA-S-2|IP_AHA-S-1|IP_AHA-CO-2|IP_AHA-CO-1|IP_AHA-C-3|IP_AHA-C-2|IP_AHA-C-1	0|0|1|0|0|2|0	3	7	0.19	0.00|0.00|0.45|0.00|0.00|0.84|0.00	0	0.1836	0.8375	0.7181
MRC1	TTHERM_01299660	IP_MRC1-S-3|IP_MRC1-S-2|IP_MRC1-S-1|IP_MRC1-CO-2|IP_MRC1-CO-1|IP_MRC1-C-1	0|4|0|1|8|2	15	6	0.13	0.00|0.01|0.00|0.00|0.93|0.00	3	0.1575	0.9325	0.7183
MRC1	TTHERM_00794540	IP_MRC1-S-3|IP_MRC1-S-2|IP_MRC1-S-1|IP_MRC1-CO-2|IP_MRC1-CO-1|IP_MRC1-C-1	0|4|0|0|11|4	19	6	0.14	0.00|0.00|0.00|0.00|0.94|0.00	4	0.1571	0.94	0.719
MTA	TTHERM_00926960	IP_AHA-S-2|IP_AHA-S-1|IP_AHA-CO-2|IP_AHA-CO-1|IP_AHA-C-3|IP_AHA-C-2|IP_AHA-C-1	7|0|1|0|0|0|0	8	7	0.16	0.88|0.00|0.40|0.00|0.00|0.00|0.00	0	0.1832	0.8825	0.7193
MTA	TTHERM_000088159	IP_AHA-S-2|IP_AHA-S-1|IP_AHA-CO-2|IP_AHA-CO-1|IP_AHA-C-3|IP_AHA-C-2|IP_AHA-C-1	0|0|2|0|0|1|0	3	7	0.2	0.00|0.00|0.76|0.00|0.00|0.52|0.00	0	0.1832	0.7625	0.7193
MTA	TTHERM_00616320	IP_AHA-S-2|IP_AHA-S-1|IP_AHA-CO-2|IP_AHA-CO-1|IP_AHA-C-3|IP_AHA-C-2|IP_AHA-C-1	0|0|2|0|0|1|0	3	7	0.2	0.00|0.00|0.80|0.00|0.00|0.48|0.00	0	0.1829	0.8	0.7199
MRC1	TTHERM_00138590	IP_MRC1-S-3|IP_MRC1-S-2|IP_MRC1-S-1|IP_MRC1-CO-2|IP_MRC1-CO-1|IP_MRC1-C-1	234|0|217|0|184|197	832	6	0.13	0.94|0.00|0.00|0.00|0.00|0.00	116	0.1558	0.935	0.7203
MRC1	TTHERM_00812780	IP_MRC1-S-3|IP_MRC1-S-2|IP_MRC1-S-1|IP_MRC1-CO-2|IP_MRC1-CO-1|IP_MRC1-C-1	0|5|1|0|9|0	15	6	0.16	0.00|0.00|0.00|0.00|0.93|0.00	4	0.1558	0.9325	0.7203
MTA	TTHERM_00565630	IP_AHA-S-2|IP_AHA-S-1|IP_AHA-CO-2|IP_AHA-CO-1|IP_AHA-C-3|IP_AHA-C-2|IP_AHA-C-1	0|0|1|0|19|0|0	20	7	0.16	0.00|0.00|0.31|0.00|0.97|0.00|0.00	0	0.1818	0.9675	0.7211
MTA	TTHERM_00335730	IP_AHA-S-2|IP_AHA-S-1|IP_AHA-CO-2|IP_AHA-CO-1|IP_AHA-C-3|IP_AHA-C-2|IP_AHA-C-1	2|0|0|0|0|1|0	3	7	0.17	0.79|0.00|0.00|0.00|0.00|0.48|0.00	0	0.1818	0.7925	0.7211
MRC1	TTHERM_00878160	IP_MRC1-S-3|IP_MRC1-S-2|IP_MRC1-S-1|IP_MRC1-CO-2|IP_MRC1-CO-1|IP_MRC1-C-1	0|0|0|0|0|6	6	6	0.19	0.00|0.00|0.00|0.00|0.00|0.92	0	0.1542	0.925	0.7216
MRC1	TTHERM_00448800	IP_MRC1-S-3|IP_MRC1-S-2|IP_MRC1-S-1|IP_MRC1-CO-2|IP_MRC1-CO-1|IP_MRC1-C-1	0|2|0|6|1|1	10	6	0.13	0.00|0.00|0.00|0.92|0.00|0.00	3	0.1542	0.925	0.7216
MTA	TTHERM_00089240	IP_AHA-S-2|IP_AHA-S-1|IP_AHA-CO-2|IP_AHA-CO-1|IP_AHA-C-3|IP_AHA-C-2|IP_AHA-C-1	0|0|1|0|17|0|0	18	7	0.18	0.00|0.00|0.30|0.00|0.96|0.00|0.00	0	0.1807	0.965	0.7217
MTA	TTHERM_00219470	IP_AHA-S-2|IP_AHA-S-1|IP_AHA-CO-2|IP_AHA-CO-1|IP_AHA-C-3|IP_AHA-C-2|IP_AHA-C-1	0|0|1|0|2|0|0	3	7	0.15	0.00|0.00|0.42|0.00|0.84|0.00|0.00	0	0.1804	0.84	0.7223
MRC1	TTHERM_00089240	IP_MRC1-S-3|IP_MRC1-S-2|IP_MRC1-S-1|IP_MRC1-CO-2|IP_MRC1-CO-1|IP_MRC1-C-1	0|0|0|6|0|0	6	6	0.17	0.00|0.00|0.00|0.92|0.00|0.00	0	0.1537	0.9225	0.7228
MRC1	THE-A2	IP_MRC1-S-3|IP_MRC1-S-2|IP_MRC1-S-1|IP_MRC1-CO-2|IP_MRC1-CO-1|IP_MRC1-C-1	0|0|8|0|0|0	8	6	0.15	0.00|0.00|0.92|0.00|0.00|0.00	0	0.1537	0.9225	0.7228
MTA	TTHERM_00196350	IP_AHA-S-2|IP_AHA-S-1|IP_AHA-CO-2|IP_AHA-CO-1|IP_AHA-C-3|IP_AHA-C-2|IP_AHA-C-1	0|0|2|0|0|1|0	3	7	0.19	0.00|0.00|0.75|0.00|0.00|0.51|0.00	0	0.18	0.7475	0.7229
MRC1	TTHERM_000929569	IP_MRC1-S-3|IP_MRC1-S-2|IP_MRC1-S-1|IP_MRC1-CO-2|IP_MRC1-CO-1|IP_MRC1-C-1	0|2|0|0|1|0	3	6	0.17	0.00|0.63|0.00|0.00|0.29|0.00	0	0.1533	0.63	0.7235
MTA	TTHERM_000131239	IP_AHA-S-2|IP_AHA-S-1|IP_AHA-CO-2|IP_AHA-CO-1|IP_AHA-C-3|IP_AHA-C-2|IP_AHA-C-1	0|0|2|0|0|1|0	3	7	0.15	0.00|0.00|0.77|0.00|0.00|0.49|0.00	0	0.1796	0.77	0.724
MTA	TTHERM_00600100	IP_AHA-S-2|IP_AHA-S-1|IP_AHA-CO-2|IP_AHA-CO-1|IP_AHA-C-3|IP_AHA-C-2|IP_AHA-C-1	0|0|2|0|0|1|0	3	7	0.19	0.00|0.00|0.72|0.00|0.00|0.53|0.00	0	0.1796	0.725	0.724
MRC1	TTHERM_00557840	IP_MRC1-S-3|IP_MRC1-S-2|IP_MRC1-S-1|IP_MRC1-CO-2|IP_MRC1-CO-1|IP_MRC1-C-1	0|0|0|9|0|0	9	6	0.17	0.00|0.00|0.00|0.92|0.00|0.00	0	0.1533	0.92	0.7247
MRC1	TTHERM_00114360	IP_MRC1-S-3|IP_MRC1-S-2|IP_MRC1-S-1|IP_MRC1-CO-2|IP_MRC1-CO-1|IP_MRC1-C-1	0|0|0|1|0|5	6	6	0.18	0.00|0.00|0.00|0.00|0.00|0.91	2	0.1533	0.915	0.7247
MTA	TTHERM_00521980	IP_AHA-S-2|IP_AHA-S-1|IP_AHA-CO-2|IP_AHA-CO-1|IP_AHA-C-3|IP_AHA-C-2|IP_AHA-C-1	0|0|1|0|2|0|0	3	7	0.19	0.00|0.00|0.40|0.00|0.85|0.00|0.00	0	0.1793	0.8525	0.7252
MTA	TTHERM_00361840	IP_AHA-S-2|IP_AHA-S-1|IP_AHA-CO-2|IP_AHA-CO-1|IP_AHA-C-3|IP_AHA-C-2|IP_AHA-C-1	0|0|1|0|2|0|0	3	7	0.19	0.00|0.00|0.43|0.00|0.82|0.00|0.00	0	0.1793	0.825	0.7252
MRC1	TTHERM_00266390	IP_MRC1-S-3|IP_MRC1-S-2|IP_MRC1-S-1|IP_MRC1-CO-2|IP_MRC1-CO-1|IP_MRC1-C-1	0|8|4|0|16|1	29	6	0.16	0.00|0.00|0.00|0.00|0.92|0.00	7	0.1529	0.9175	0.7253
MTA	TTHERM_00529660	IP_AHA-S-2|IP_AHA-S-1|IP_AHA-CO-2|IP_AHA-CO-1|IP_AHA-C-3|IP_AHA-C-2|IP_AHA-C-1	0|3|1|0|7|0|0	11	7	0.17	0.00|0.25|0.00|0.00|1.00|0.00|0.00	2	0.1789	1	0.7257
MRC1	TTHERM_01053000	IP_MRC1-S-3|IP_MRC1-S-2|IP_MRC1-S-1|IP_MRC1-CO-2|IP_MRC1-CO-1|IP_MRC1-C-1	0|13|7|5|25|4	54	6	0.16	0.00|0.00|0.00|0.00|0.91|0.00	11	0.1525	0.915	0.7265
MRC1	TTHERM_00219410	IP_MRC1-S-3|IP_MRC1-S-2|IP_MRC1-S-1|IP_MRC1-CO-2|IP_MRC1-CO-1|IP_MRC1-C-1	0|0|0|11|0|0	11	6	0.15	0.00|0.00|0.00|0.91|0.00|0.00	0	0.1525	0.915	0.7265
MRC1	TTHERM_00486600	IP_MRC1-S-3|IP_MRC1-S-2|IP_MRC1-S-1|IP_MRC1-CO-2|IP_MRC1-CO-1|IP_MRC1-C-1	0|0|0|0|0|4	4	6	0.14	0.00|0.00|0.00|0.00|0.00|0.91	0	0.1512	0.9075	0.7271
MTA	TTHERM_001207659	IP_AHA-S-2|IP_AHA-S-1|IP_AHA-CO-2|IP_AHA-CO-1|IP_AHA-C-3|IP_AHA-C-2|IP_AHA-C-1	0|0|16|0|0|5|0	21	7	0.15	0.00|0.00|1.00|0.00|0.00|0.24|0.00	3	0.1775	0.9975	0.7274
MTA	TTHERM_01076960	IP_AHA-S-2|IP_AHA-S-1|IP_AHA-CO-2|IP_AHA-CO-1|IP_AHA-C-3|IP_AHA-C-2|IP_AHA-C-1	0|0|1|0|3|0|0	4	7	0.22	0.00|0.00|0.39|0.00|0.85|0.00|0.00	0	0.1775	0.855	0.7274
MTA	TTHERM_00433470	IP_AHA-S-2|IP_AHA-S-1|IP_AHA-CO-2|IP_AHA-CO-1|IP_AHA-C-3|IP_AHA-C-2|IP_AHA-C-1	2|0|0|0|0|1|0	3	7	0.18	0.77|0.00|0.00|0.00|0.00|0.47|0.00	0	0.1775	0.775	0.7274
MRC1	TTHERM_00755880	IP_MRC1-S-3|IP_MRC1-S-2|IP_MRC1-S-1|IP_MRC1-CO-2|IP_MRC1-CO-1|IP_MRC1-C-1	0|0|0|9|0|0	9	6	0.16	0.00|0.00|0.00|0.90|0.00|0.00	0	0.1508	0.905	0.7277
MTA	TTHERM_00726300	IP_AHA-S-2|IP_AHA-S-1|IP_AHA-CO-2|IP_AHA-CO-1|IP_AHA-C-3|IP_AHA-C-2|IP_AHA-C-1	0|0|1|0|3|0|0	4	7	0.18	0.00|0.00|0.38|0.00|0.86|0.00|0.00	0	0.1768	0.8625	0.7279
MTA	TTHERM_00773610	IP_AHA-S-2|IP_AHA-S-1|IP_AHA-CO-2|IP_AHA-CO-1|IP_AHA-C-3|IP_AHA-C-2|IP_AHA-C-1	3|0|1|0|0|0|0	4	7	0.16	0.81|0.00|0.43|0.00|0.00|0.00|0.00	0	0.1761	0.805	0.7285
MTA	TTHERM_00648930	IP_AHA-S-2|IP_AHA-S-1|IP_AHA-CO-2|IP_AHA-CO-1|IP_AHA-C-3|IP_AHA-C-2|IP_AHA-C-1	0|3|0|0|12|0|0	15	7	0.18	0.00|0.22|0.00|0.00|1.00|0.00|0.00	2	0.175	1	0.729
MRC1	TTHERM_01044640	IP_MRC1-S-3|IP_MRC1-S-2|IP_MRC1-S-1|IP_MRC1-CO-2|IP_MRC1-CO-1|IP_MRC1-C-1	0|0|0|9|0|0	9	6	0.17	0.00|0.00|0.00|0.90|0.00|0.00	0	0.15	0.9	0.7295
MRC1	TTHERM_00052470	IP_MRC1-S-3|IP_MRC1-S-2|IP_MRC1-S-1|IP_MRC1-CO-2|IP_MRC1-CO-1|IP_MRC1-C-1	0|0|0|0|0|4	4	6	0.13	0.00|0.00|0.00|0.00|0.00|0.90	0	0.15	0.9	0.7295
MRC1	TTHERM_00658750	IP_MRC1-S-3|IP_MRC1-S-2|IP_MRC1-S-1|IP_MRC1-CO-2|IP_MRC1-CO-1|IP_MRC1-C-1	0|0|0|6|0|1	7	6	0.11	0.00|0.00|0.00|0.90|0.00|0.00	3	0.15	0.9	0.7295
MTA	TTHERM_01027490	IP_AHA-S-2|IP_AHA-S-1|IP_AHA-CO-2|IP_AHA-CO-1|IP_AHA-C-3|IP_AHA-C-2|IP_AHA-C-1	0|0|1|0|0|2|0	3	7	0.16	0.00|0.00|0.40|0.00|0.00|0.81|0.00	0	0.1729	0.8125	0.7301
MTA	TTHERM_00316160	IP_AHA-S-2|IP_AHA-S-1|IP_AHA-CO-2|IP_AHA-CO-1|IP_AHA-C-3|IP_AHA-C-2|IP_AHA-C-1	0|0|2|0|0|1|0	3	7	0.16	0.00|0.00|0.71|0.00|0.00|0.50|0.00	0	0.1729	0.7125	0.7301
MRC1	TTHERM_00120830	IP_MRC1-S-3|IP_MRC1-S-2|IP_MRC1-S-1|IP_MRC1-CO-2|IP_MRC1-CO-1|IP_MRC1-C-1	0|0|0|5|0|0	5	6	0.16	0.00|0.00|0.00|0.89|0.00|0.00	0	0.1492	0.895	0.7301
MRC1	TTHERM_01043220	IP_MRC1-S-3|IP_MRC1-S-2|IP_MRC1-S-1|IP_MRC1-CO-2|IP_MRC1-CO-1|IP_MRC1-C-1	0|0|0|4|0|0	4	6	0.16	0.00|0.00|0.00|0.89|0.00|0.00	0	0.1487	0.8925	0.7306
MTA	TTHERM_000050608	IP_AHA-S-2|IP_AHA-S-1|IP_AHA-CO-2|IP_AHA-CO-1|IP_AHA-C-3|IP_AHA-C-2|IP_AHA-C-1	0|3|1|0|0|0|0	4	7	0.15	0.00|0.84|0.36|0.00|0.00|0.00|0.00	0	0.1721	0.84	0.7307
MTA	TTHERM_00721530	IP_AHA-S-2|IP_AHA-S-1|IP_AHA-CO-2|IP_AHA-CO-1|IP_AHA-C-3|IP_AHA-C-2|IP_AHA-C-1	0|0|1|0|0|2|0	3	7	0.17	0.00|0.00|0.38|0.00|0.00|0.81|0.00	0	0.17	0.8075	0.7312
MRC1	TTHERM_000655859	IP_MRC1-S-3|IP_MRC1-S-2|IP_MRC1-S-1|IP_MRC1-CO-2|IP_MRC1-CO-1|IP_MRC1-C-1	0|0|0|7|0|0	7	6	0.17	0.00|0.00|0.00|0.89|0.00|0.00	0	0.1483	0.89	0.7312
MTA	TTHERM_00114360	IP_AHA-S-2|IP_AHA-S-1|IP_AHA-CO-2|IP_AHA-CO-1|IP_AHA-C-3|IP_AHA-C-2|IP_AHA-C-1	0|4|2|0|1|4|0	11	7	0.18	0.00|0.70|0.01|0.00|0.00|0.48|0.00	2	0.1696	0.7025	0.7317
MRC1	TTHERM_00989470	IP_MRC1-S-3|IP_MRC1-S-2|IP_MRC1-S-1|IP_MRC1-CO-2|IP_MRC1-CO-1|IP_MRC1-C-1	0|0|0|4|0|0	4	6	0.14	0.00|0.00|0.00|0.89|0.00|0.00	0	0.1479	0.8875	0.7318
MTA	TTHERM_00653950	IP_AHA-S-2|IP_AHA-S-1|IP_AHA-CO-2|IP_AHA-CO-1|IP_AHA-C-3|IP_AHA-C-2|IP_AHA-C-1	0|0|1|0|0|2|0	3	7	0.15	0.00|0.00|0.38|0.00|0.00|0.79|0.00	0	0.1675	0.79	0.7323
MRC1	TTHERM_00220600	IP_MRC1-S-3|IP_MRC1-S-2|IP_MRC1-S-1|IP_MRC1-CO-2|IP_MRC1-CO-1|IP_MRC1-C-1	0|3|0|0|7|0	10	6	0.16	0.00|0.00|0.00|0.00|0.88|0.00	3	0.1475	0.88	0.7324
MTA	TTHERM_00047490	IP_AHA-S-2|IP_AHA-S-1|IP_AHA-CO-2|IP_AHA-CO-1|IP_AHA-C-3|IP_AHA-C-2|IP_AHA-C-1	2|0|1|0|0|0|0	3	7	0.16	0.75|0.00|0.41|0.00|0.00|0.00|0.00	0	0.1654	0.75	0.7328
MRC1	TTHERM_00221070	IP_MRC1-S-3|IP_MRC1-S-2|IP_MRC1-S-1|IP_MRC1-CO-2|IP_MRC1-CO-1|IP_MRC1-C-1	0|0|0|5|0|0	5	6	0.17	0.00|0.00|0.00|0.88|0.00|0.00	0	0.1471	0.8825	0.7329
MTA	TTHERM_00156700	IP_AHA-S-2|IP_AHA-S-1|IP_AHA-CO-2|IP_AHA-CO-1|IP_AHA-C-3|IP_AHA-C-2|IP_AHA-C-1	0|0|1|0|0|2|0	3	7	0.13	0.00|0.00|0.36|0.00|0.00|0.79|0.00	0	0.165	0.79	0.7334
MTA	TTHERM_00624730	IP_AHA-S-2|IP_AHA-S-1|IP_AHA-CO-2|IP_AHA-CO-1|IP_AHA-C-3|IP_AHA-C-2|IP_AHA-C-1	6|0|3|0|0|3|0	12	7	0.17	1.00|0.00|0.06|0.00|0.00|0.09|0.00	2	0.1639	1	0.7339
MTA	TTHERM_00070910	IP_AHA-S-2|IP_AHA-S-1|IP_AHA-CO-2|IP_AHA-CO-1|IP_AHA-C-3|IP_AHA-C-2|IP_AHA-C-1	0|0|0|0|1|0|3	4	7	0.16	0.00|0.00|0.00|0.00|0.48|0.00|0.63	0	0.1586	0.6325	0.7345
MRC1	TTHERM_000685989	IP_MRC1-S-3|IP_MRC1-S-2|IP_MRC1-S-1|IP_MRC1-CO-2|IP_MRC1-CO-1|IP_MRC1-C-1	0|0|0|5|0|0	5	6	0.15	0.00|0.00|0.00|0.88|0.00|0.00	0	0.1467	0.88	0.7346
MRC1	TTHERM_00691150	IP_MRC1-S-3|IP_MRC1-S-2|IP_MRC1-S-1|IP_MRC1-CO-2|IP_MRC1-CO-1|IP_MRC1-C-1	0|0|0|9|0|0	9	6	0.14	0.00|0.00|0.00|0.88|0.00|0.00	0	0.1467	0.88	0.7346
MRC1	TTHERM_00145270	IP_MRC1-S-3|IP_MRC1-S-2|IP_MRC1-S-1|IP_MRC1-CO-2|IP_MRC1-CO-1|IP_MRC1-C-1	0|0|0|4|0|0	4	6	0.18	0.00|0.00|0.00|0.88|0.00|0.00	0	0.1467	0.88	0.7346
MTA	TTHERM_00421000	IP_AHA-S-2|IP_AHA-S-1|IP_AHA-CO-2|IP_AHA-CO-1|IP_AHA-C-3|IP_AHA-C-2|IP_AHA-C-1	0|4|4|0|2|0|0	10	7	0.16	0.00|0.71|0.36|0.00|0.02|0.00|0.00	2	0.1554	0.7075	0.7351
MRC1	TTHERM_00101150	IP_MRC1-S-3|IP_MRC1-S-2|IP_MRC1-S-1|IP_MRC1-CO-2|IP_MRC1-CO-1|IP_MRC1-C-1	0|0|0|4|0|0	4	6	0.17	0.00|0.00|0.00|0.88|0.00|0.00	0	0.1462	0.8775	0.7352
MTA	TTHERM_00502220	IP_AHA-S-2|IP_AHA-S-1|IP_AHA-CO-2|IP_AHA-CO-1|IP_AHA-C-3|IP_AHA-C-2|IP_AHA-C-1	1|5|1|0|0|5|0	12	7	0.16	0.00|0.72|0.00|0.00|0.00|0.33|0.00	3	0.1507	0.7225	0.7357
MRC1	TTHERM_00896070	IP_MRC1-S-3|IP_MRC1-S-2|IP_MRC1-S-1|IP_MRC1-CO-2|IP_MRC1-CO-1|IP_MRC1-C-1	0|0|0|4|0|0	4	6	0.14	0.00|0.00|0.00|0.88|0.00|0.00	0	0.1458	0.875	0.7368
MRC1	TTHERM_00148900	IP_MRC1-S-3|IP_MRC1-S-2|IP_MRC1-S-1|IP_MRC1-CO-2|IP_MRC1-CO-1|IP_MRC1-C-1	0|0|0|6|0|0	6	6	0.14	0.00|0.00|0.00|0.88|0.00|0.00	0	0.1458	0.875	0.7368
MRC1	TTHERM_001035761	IP_MRC1-S-3|IP_MRC1-S-2|IP_MRC1-S-1|IP_MRC1-CO-2|IP_MRC1-CO-1|IP_MRC1-C-1	0|0|0|4|0|0	4	6	0.16	0.00|0.00|0.00|0.88|0.00|0.00	0	0.1458	0.875	0.7368
MTA	TTHERM_00835120	IP_AHA-S-2|IP_AHA-S-1|IP_AHA-CO-2|IP_AHA-CO-1|IP_AHA-C-3|IP_AHA-C-2|IP_AHA-C-1	0|0|10|0|2|0|0	12	7	0.16	0.00|0.00|1.00|0.00|0.02|0.00|0.00	2	0.145	0.9975	0.7375
MTA	TTHERM_00582070	IP_AHA-S-2|IP_AHA-S-1|IP_AHA-CO-2|IP_AHA-CO-1|IP_AHA-C-3|IP_AHA-C-2|IP_AHA-C-1	0|0|13|0|0|2|0	15	7	0.18	0.00|0.00|1.00|0.00|0.00|0.02|0.00	2	0.145	0.9975	0.7375
MTA	TTHERM_00444850	IP_AHA-S-2|IP_AHA-S-1|IP_AHA-CO-2|IP_AHA-CO-1|IP_AHA-C-3|IP_AHA-C-2|IP_AHA-C-1	1|6|2|0|0|0|0	9	7	0.18	0.00|1.00|0.01|0.00|0.00|0.00|0.00	2	0.145	0.9975	0.7375
MRC1	TTHERM_00527090	IP_MRC1-S-3|IP_MRC1-S-2|IP_MRC1-S-1|IP_MRC1-CO-2|IP_MRC1-CO-1|IP_MRC1-C-1	0|0|0|5|0|0	5	6	0.15	0.00|0.00|0.00|0.87|0.00|0.00	0	0.1454	0.8725	0.7389
MRC1	TTHERM_00594210	IP_MRC1-S-3|IP_MRC1-S-2|IP_MRC1-S-1|IP_MRC1-CO-2|IP_MRC1-CO-1|IP_MRC1-C-1	0|3|0|6|0|2	11	6	0.15	0.00|0.00|0.00|0.87|0.00|0.00	3	0.1454	0.8725	0.7389
MRC1	TTHERM_00841250	IP_MRC1-S-3|IP_MRC1-S-2|IP_MRC1-S-1|IP_MRC1-CO-2|IP_MRC1-CO-1|IP_MRC1-C-1	0|0|0|3|0|0	3	6	0.16	0.00|0.00|0.00|0.87|0.00|0.00	0	0.1454	0.8725	0.7389
MRC1	TTHERM_00444310	IP_MRC1-S-3|IP_MRC1-S-2|IP_MRC1-S-1|IP_MRC1-CO-2|IP_MRC1-CO-1|IP_MRC1-C-1	0|0|0|4|0|0	4	6	0.14	0.00|0.00|0.00|0.87|0.00|0.00	0	0.1454	0.8725	0.7389
MRC1	TTHERM_00494880	IP_MRC1-S-3|IP_MRC1-S-2|IP_MRC1-S-1|IP_MRC1-CO-2|IP_MRC1-CO-1|IP_MRC1-C-1	0|0|0|4|0|0	4	6	0.14	0.00|0.00|0.00|0.87|0.00|0.00	0	0.145	0.87	0.7399
MRC1	TTHERM_000053759	IP_MRC1-S-3|IP_MRC1-S-2|IP_MRC1-S-1|IP_MRC1-CO-2|IP_MRC1-CO-1|IP_MRC1-C-1	0|4|0|0|0|0	4	6	0.16	0.00|0.87|0.00|0.00|0.00|0.00	0	0.145	0.87	0.7399
MRC1	TTHERM_00624710	IP_MRC1-S-3|IP_MRC1-S-2|IP_MRC1-S-1|IP_MRC1-CO-2|IP_MRC1-CO-1|IP_MRC1-C-1	0|0|0|3|0|0	3	6	0.15	0.00|0.00|0.00|0.87|0.00|0.00	0	0.1446	0.8675	0.7409
MRC1	TTHERM_00760400	IP_MRC1-S-3|IP_MRC1-S-2|IP_MRC1-S-1|IP_MRC1-CO-2|IP_MRC1-CO-1|IP_MRC1-C-1	0|0|0|5|0|0	5	6	0.13	0.00|0.00|0.00|0.87|0.00|0.00	0	0.1446	0.8675	0.7409
MRC1	TTHERM_00823400	IP_MRC1-S-3|IP_MRC1-S-2|IP_MRC1-S-1|IP_MRC1-CO-2|IP_MRC1-CO-1|IP_MRC1-C-1	0|0|0|4|0|0	4	6	0.15	0.00|0.00|0.00|0.86|0.00|0.00	0	0.1433	0.86	0.7414
MRC1	TTHERM_00726300	IP_MRC1-S-3|IP_MRC1-S-2|IP_MRC1-S-1|IP_MRC1-CO-2|IP_MRC1-CO-1|IP_MRC1-C-1	0|0|0|3|0|0	3	6	0.12	0.00|0.00|0.00|0.86|0.00|0.00	0	0.1429	0.8575	0.7419
MTA	TTHERM_01161040	IP_AHA-S-2|IP_AHA-S-1|IP_AHA-CO-2|IP_AHA-CO-1|IP_AHA-C-3|IP_AHA-C-2|IP_AHA-C-1	0|0|0|0|35|1|0	36	7	0.15	0.00|0.00|0.00|0.00|1.00|0.00|0.00	6	0.1429	1	0.7423
MTA	TTHERM_01243470	IP_AHA-S-2|IP_AHA-S-1|IP_AHA-CO-2|IP_AHA-CO-1|IP_AHA-C-3|IP_AHA-C-2|IP_AHA-C-1	0|6|0|0|0|0|0	6	7	0.14	0.00|1.00|0.00|0.00|0.00|0.00|0.00	2	0.1429	1	0.7423
MTA	TTHERM_00522240	IP_AHA-S-2|IP_AHA-S-1|IP_AHA-CO-2|IP_AHA-CO-1|IP_AHA-C-3|IP_AHA-C-2|IP_AHA-C-1	0|0|11|0|0|1|0	12	7	0.13	0.00|0.00|1.00|0.00|0.00|0.00|0.00	3	0.1429	1	0.7423
MTA	TTHERM_00813040	IP_AHA-S-2|IP_AHA-S-1|IP_AHA-CO-2|IP_AHA-CO-1|IP_AHA-C-3|IP_AHA-C-2|IP_AHA-C-1	0|8|4|0|23|0|0	35	7	0.13	0.00|0.00|0.00|0.00|1.00|0.00|0.00	9	0.1429	1	0.7423
MTA	TTHERM_00645780	IP_AHA-S-2|IP_AHA-S-1|IP_AHA-CO-2|IP_AHA-CO-1|IP_AHA-C-3|IP_AHA-C-2|IP_AHA-C-1	0|3|1|0|18|0|0	22	7	0.16	0.00|0.00|0.00|0.00|1.00|0.00|0.00	6	0.1429	1	0.7423
MTA	TTHERM_00194540	IP_AHA-S-2|IP_AHA-S-1|IP_AHA-CO-2|IP_AHA-CO-1|IP_AHA-C-3|IP_AHA-C-2|IP_AHA-C-1	0|6|0|0|27|0|1	34	7	0.14	0.00|0.00|0.00|0.00|1.00|0.00|0.00	13	0.1429	1	0.7423
MTA	TTHERM_00079300	IP_AHA-S-2|IP_AHA-S-1|IP_AHA-CO-2|IP_AHA-CO-1|IP_AHA-C-3|IP_AHA-C-2|IP_AHA-C-1	0|0|3|0|21|0|0	24	7	0.16	0.00|0.00|0.00|0.00|1.00|0.00|0.00	7	0.1429	1	0.7423
MTA	TTHERM_01093550	IP_AHA-S-2|IP_AHA-S-1|IP_AHA-CO-2|IP_AHA-CO-1|IP_AHA-C-3|IP_AHA-C-2|IP_AHA-C-1	0|0|0|0|22|0|1	23	7	0.16	0.00|0.00|0.00|0.00|1.00|0.00|0.00	8	0.1429	1	0.7423
MRC1	TTHERM_00011449	IP_MRC1-S-3|IP_MRC1-S-2|IP_MRC1-S-1|IP_MRC1-CO-2|IP_MRC1-CO-1|IP_MRC1-C-1	0|0|0|3|0|0	3	6	0.13	0.00|0.00|0.00|0.85|0.00|0.00	0	0.1425	0.855	0.7429
MRC1	TTHERM_00591660	IP_MRC1-S-3|IP_MRC1-S-2|IP_MRC1-S-1|IP_MRC1-CO-2|IP_MRC1-CO-1|IP_MRC1-C-1	0|0|0|3|0|0	3	6	0.14	0.00|0.00|0.00|0.85|0.00|0.00	0	0.1425	0.855	0.7429
MRC1	TTHERM_01034400	IP_MRC1-S-3|IP_MRC1-S-2|IP_MRC1-S-1|IP_MRC1-CO-2|IP_MRC1-CO-1|IP_MRC1-C-1	0|0|0|3|0|0	3	6	0.13	0.00|0.00|0.00|0.84|0.00|0.00	0	0.1408	0.845	0.7434
MTA	TTHERM_01513250	IP_AHA-S-2|IP_AHA-S-1|IP_AHA-CO-2|IP_AHA-CO-1|IP_AHA-C-3|IP_AHA-C-2|IP_AHA-C-1	0|0|2|0|6|0|0	8	7	0.18	0.00|0.00|0.01|0.00|0.99|0.00|0.00	2	0.1429	0.9925	0.744
MTA	TTHERM_00146220	IP_AHA-S-2|IP_AHA-S-1|IP_AHA-CO-2|IP_AHA-CO-1|IP_AHA-C-3|IP_AHA-C-2|IP_AHA-C-1	0|0|10|0|3|0|0	13	7	0.12	0.00|0.00|0.99|0.00|0.01|0.00|0.00	3	0.1429	0.9925	0.744
MTA	TTHERM_00715760	IP_AHA-S-2|IP_AHA-S-1|IP_AHA-CO-2|IP_AHA-CO-1|IP_AHA-C-3|IP_AHA-C-2|IP_AHA-C-1	0|4|4|0|0|0|0	8	7	0.16	0.00|0.72|0.28|0.00|0.00|0.00|0.00	2	0.1429	0.72	0.744
MRC1	TTHERM_00703440	IP_MRC1-S-3|IP_MRC1-S-2|IP_MRC1-S-1|IP_MRC1-CO-2|IP_MRC1-CO-1|IP_MRC1-C-1	0|0|0|0|0|3	3	6	0.11	0.00|0.00|0.00|0.00|0.00|0.84	0	0.1404	0.8425	0.7449
MRC1	TTHERM_01055640	IP_MRC1-S-3|IP_MRC1-S-2|IP_MRC1-S-1|IP_MRC1-CO-2|IP_MRC1-CO-1|IP_MRC1-C-1	0|0|0|4|0|0	4	6	0.13	0.00|0.00|0.00|0.84|0.00|0.00	0	0.1404	0.8425	0.7449
MRC1	TTHERM_000570549	IP_MRC1-S-3|IP_MRC1-S-2|IP_MRC1-S-1|IP_MRC1-CO-2|IP_MRC1-CO-1|IP_MRC1-C-1	0|5|0|0|7|0	12	6	0.14	0.00|0.12|0.00|0.00|0.72|0.00	3	0.1404	0.725	0.7449
MRC1	TTHERM_00962070	IP_MRC1-S-3|IP_MRC1-S-2|IP_MRC1-S-1|IP_MRC1-CO-2|IP_MRC1-CO-1|IP_MRC1-C-1	0|0|0|3|0|0	3	6	0.14	0.00|0.00|0.00|0.84|0.00|0.00	0	0.14	0.84	0.7454
MRC1	TTHERM_00082240	IP_MRC1-S-3|IP_MRC1-S-2|IP_MRC1-S-1|IP_MRC1-CO-2|IP_MRC1-CO-1|IP_MRC1-C-1	0|0|0|3|0|0	3	6	0.15	0.00|0.00|0.00|0.84|0.00|0.00	0	0.1396	0.8375	0.7459
MTA	TTHERM_00431340	IP_AHA-S-2|IP_AHA-S-1|IP_AHA-CO-2|IP_AHA-CO-1|IP_AHA-C-3|IP_AHA-C-2|IP_AHA-C-1	0|0|1|0|9|0|0	10	7	0.12	0.00|0.00|0.00|0.00|1.00|0.00|0.00	2	0.1425	0.9975	0.7462
MTA	TTHERM_00302060	IP_AHA-S-2|IP_AHA-S-1|IP_AHA-CO-2|IP_AHA-CO-1|IP_AHA-C-3|IP_AHA-C-2|IP_AHA-C-1	0|0|5|0|48|0|0	53	7	0.14	0.00|0.00|0.00|0.00|1.00|0.00|0.00	22	0.1425	0.9975	0.7462
MTA	TTHERM_00444500	IP_AHA-S-2|IP_AHA-S-1|IP_AHA-CO-2|IP_AHA-CO-1|IP_AHA-C-3|IP_AHA-C-2|IP_AHA-C-1	0|0|1|0|21|0|0	22	7	0.12	0.00|0.00|0.00|0.00|1.00|0.00|0.00	2	0.1425	0.9975	0.7462
MTA	TTHERM_00227770	IP_AHA-S-2|IP_AHA-S-1|IP_AHA-CO-2|IP_AHA-CO-1|IP_AHA-C-3|IP_AHA-C-2|IP_AHA-C-1	1|1|11|0|0|0|0	13	7	0.16	0.00|0.00|0.99|0.00|0.00|0.00|0.00	2	0.1425	0.9925	0.7462
MRC1	TTHERM_00853150	IP_MRC1-S-3|IP_MRC1-S-2|IP_MRC1-S-1|IP_MRC1-CO-2|IP_MRC1-CO-1|IP_MRC1-C-1	0|4|0|0|0|0	4	6	0.13	0.00|0.83|0.00|0.00|0.00|0.00	0	0.1392	0.835	0.7468
MRC1	TTHERM_00717440	IP_MRC1-S-3|IP_MRC1-S-2|IP_MRC1-S-1|IP_MRC1-CO-2|IP_MRC1-CO-1|IP_MRC1-C-1	0|0|0|0|3|0	3	6	0.11	0.00|0.00|0.00|0.00|0.83|0.00	0	0.1392	0.835	0.7468
MRC1	TTHERM_00734050	IP_MRC1-S-3|IP_MRC1-S-2|IP_MRC1-S-1|IP_MRC1-CO-2|IP_MRC1-CO-1|IP_MRC1-C-1	0|0|0|3|0|0	3	6	0.13	0.00|0.00|0.00|0.83|0.00|0.00	0	0.1383	0.83	0.7478
MRC1	TTHERM_00318730	IP_MRC1-S-3|IP_MRC1-S-2|IP_MRC1-S-1|IP_MRC1-CO-2|IP_MRC1-CO-1|IP_MRC1-C-1	0|0|0|3|0|0	3	6	0.13	0.00|0.00|0.00|0.83|0.00|0.00	0	0.1383	0.83	0.7478
MTA	TTHERM_00606960	IP_AHA-S-2|IP_AHA-S-1|IP_AHA-CO-2|IP_AHA-CO-1|IP_AHA-C-3|IP_AHA-C-2|IP_AHA-C-1	24|1|0|0|0|3|0	28	7	0.14	1.00|0.00|0.00|0.00|0.00|0.00|0.00	8	0.1421	0.995	0.7483
MTA	TTHERM_00077230	IP_AHA-S-2|IP_AHA-S-1|IP_AHA-CO-2|IP_AHA-CO-1|IP_AHA-C-3|IP_AHA-C-2|IP_AHA-C-1	0|5|6|0|42|0|2	55	7	0.14	0.00|0.00|0.00|0.00|1.00|0.00|0.00	14	0.1421	0.995	0.7483
MTA	TTHERM_00455630	IP_AHA-S-2|IP_AHA-S-1|IP_AHA-CO-2|IP_AHA-CO-1|IP_AHA-C-3|IP_AHA-C-2|IP_AHA-C-1	0|0|1|0|0|9|0	10	7	0.12	0.00|0.00|0.00|0.00|0.00|1.00|0.00	2	0.1421	0.995	0.7483
MTA	TTHERM_00377400	IP_AHA-S-2|IP_AHA-S-1|IP_AHA-CO-2|IP_AHA-CO-1|IP_AHA-C-3|IP_AHA-C-2|IP_AHA-C-1	0|0|12|0|2|0|0	14	7	0.16	0.00|0.00|1.00|0.00|0.00|0.00|0.00	4	0.1421	0.995	0.7483
MRC1	TTHERM_00383610	IP_MRC1-S-3|IP_MRC1-S-2|IP_MRC1-S-1|IP_MRC1-CO-2|IP_MRC1-CO-1|IP_MRC1-C-1	0|0|0|0|0|3	3	6	0.13	0.00|0.00|0.00|0.00|0.00|0.82	0	0.1367	0.82	0.7487
MRC1	TTHERM_00849280	IP_MRC1-S-3|IP_MRC1-S-2|IP_MRC1-S-1|IP_MRC1-CO-2|IP_MRC1-CO-1|IP_MRC1-C-1	0|0|0|3|0|0	3	6	0.13	0.00|0.00|0.00|0.82|0.00|0.00	0	0.1367	0.82	0.7487
MRC1	TTHERM_00429650	IP_MRC1-S-3|IP_MRC1-S-2|IP_MRC1-S-1|IP_MRC1-CO-2|IP_MRC1-CO-1|IP_MRC1-C-1	0|0|3|0|0|0	3	6	0.13	0.00|0.00|0.81|0.00|0.00|0.00	0	0.1346	0.8075	0.7492
MTA	TTHERM_00047280	IP_AHA-S-2|IP_AHA-S-1|IP_AHA-CO-2|IP_AHA-CO-1|IP_AHA-C-3|IP_AHA-C-2|IP_AHA-C-1	0|0|8|0|0|1|0	9	7	0.13	0.00|0.00|0.99|0.00|0.00|0.00|0.00	2	0.1411	0.9875	0.7493
MTA	TTHERM_00703660	IP_AHA-S-2|IP_AHA-S-1|IP_AHA-CO-2|IP_AHA-CO-1|IP_AHA-C-3|IP_AHA-C-2|IP_AHA-C-1	0|0|7|0|0|2|0	9	7	0.13	0.00|0.00|0.98|0.00|0.00|0.01|0.00	2	0.1411	0.98	0.7493
MRC1	TTHERM_00582140	IP_MRC1-S-3|IP_MRC1-S-2|IP_MRC1-S-1|IP_MRC1-CO-2|IP_MRC1-CO-1|IP_MRC1-C-1	0|0|0|3|0|0	3	6	0.1	0.00|0.00|0.00|0.80|0.00|0.00	0	0.1333	0.8	0.7497
MTA	TTHERM_01091290	IP_AHA-S-2|IP_AHA-S-1|IP_AHA-CO-2|IP_AHA-CO-1|IP_AHA-C-3|IP_AHA-C-2|IP_AHA-C-1	1|0|0|0|58|0|3	62	7	0.11	0.00|0.00|0.00|0.00|0.98|0.00|0.00	15	0.1407	0.985	0.7503
MTA	TTHERM_00079910	IP_AHA-S-2|IP_AHA-S-1|IP_AHA-CO-2|IP_AHA-CO-1|IP_AHA-C-3|IP_AHA-C-2|IP_AHA-C-1	0|3|3|0|7|0|0	13	7	0.13	0.00|0.00|0.00|0.00|0.98|0.00|0.00	3	0.1407	0.9775	0.7503
MRC1	TTHERM_00636860	IP_MRC1-S-3|IP_MRC1-S-2|IP_MRC1-S-1|IP_MRC1-CO-2|IP_MRC1-CO-1|IP_MRC1-C-1	0|0|0|2|0|0	2	6	0.14	0.00|0.00|0.00|0.80|0.00|0.00	0	0.1329	0.7975	0.7506
MRC1	TTHERM_00653810	IP_MRC1-S-3|IP_MRC1-S-2|IP_MRC1-S-1|IP_MRC1-CO-2|IP_MRC1-CO-1|IP_MRC1-C-1	0|0|0|2|0|0	2	6	0.15	0.00|0.00|0.00|0.80|0.00|0.00	0	0.1329	0.7975	0.7506
MTA	TTHERM_00365340	IP_AHA-S-2|IP_AHA-S-1|IP_AHA-CO-2|IP_AHA-CO-1|IP_AHA-C-3|IP_AHA-C-2|IP_AHA-C-1	0|2|23|0|60|8|3	96	7	0.15	0.00|0.00|0.00|0.00|0.98|0.00|0.00	17	0.1404	0.9825	0.7508
MRC1	TTHERM_00621550	IP_MRC1-S-3|IP_MRC1-S-2|IP_MRC1-S-1|IP_MRC1-CO-2|IP_MRC1-CO-1|IP_MRC1-C-1	0|0|0|2|0|0	2	6	0.14	0.00|0.00|0.00|0.79|0.00|0.00	0	0.1325	0.795	0.7511
MTA	TTHERM_00078920	IP_AHA-S-2|IP_AHA-S-1|IP_AHA-CO-2|IP_AHA-CO-1|IP_AHA-C-3|IP_AHA-C-2|IP_AHA-C-1	0|0|0|0|7|0|0	7	7	0.14	0.00|0.00|0.00|0.00|0.98|0.00|0.00	3	0.14	0.98	0.7513
MRC1	TTHERM_00677980	IP_MRC1-S-3|IP_MRC1-S-2|IP_MRC1-S-1|IP_MRC1-CO-2|IP_MRC1-CO-1|IP_MRC1-C-1	0|3|0|0|0|0	3	6	0.13	0.00|0.79|0.00|0.00|0.00|0.00	0	0.1317	0.79	0.7525
MRC1	TTHERM_00427560	IP_MRC1-S-3|IP_MRC1-S-2|IP_MRC1-S-1|IP_MRC1-CO-2|IP_MRC1-CO-1|IP_MRC1-C-1	0|0|0|2|0|0	2	6	0.14	0.00|0.00|0.00|0.79|0.00|0.00	0	0.1317	0.79	0.7525
MRC1	TTHERM_00260690	IP_MRC1-S-3|IP_MRC1-S-2|IP_MRC1-S-1|IP_MRC1-CO-2|IP_MRC1-CO-1|IP_MRC1-C-1	0|5|0|0|2|0	7	6	0.12	0.00|0.78|0.00|0.00|0.01|0.00	2	0.1317	0.7825	0.7525
MTA	TTHERM_00538940	IP_AHA-S-2|IP_AHA-S-1|IP_AHA-CO-2|IP_AHA-CO-1|IP_AHA-C-3|IP_AHA-C-2|IP_AHA-C-1	0|1|5|0|59|0|5	70	7	0.13	0.00|0.00|0.00|0.00|0.98|0.00|0.00	21	0.1396	0.9775	0.7528
MTA	TTHERM_00787240	IP_AHA-S-2|IP_AHA-S-1|IP_AHA-CO-2|IP_AHA-CO-1|IP_AHA-C-3|IP_AHA-C-2|IP_AHA-C-1	0|10|2|0|0|3|0	15	7	0.12	0.00|0.98|0.00|0.00|0.00|0.00|0.00	5	0.1396	0.9775	0.7528
MTA	TTHERM_00191800	IP_AHA-S-2|IP_AHA-S-1|IP_AHA-CO-2|IP_AHA-CO-1|IP_AHA-C-3|IP_AHA-C-2|IP_AHA-C-1	0|0|0|0|0|9|0	9	7	0.11	0.00|0.00|0.00|0.00|0.00|0.98|0.00	0	0.1396	0.9775	0.7528
MRC1	TTHERM_00732610	IP_MRC1-S-3|IP_MRC1-S-2|IP_MRC1-S-1|IP_MRC1-CO-2|IP_MRC1-CO-1|IP_MRC1-C-1	0|0|0|2|0|0	2	6	0.1	0.00|0.00|0.00|0.78|0.00|0.00	0	0.1308	0.785	0.753
MTA	TTHERM_01289110	IP_AHA-S-2|IP_AHA-S-1|IP_AHA-CO-2|IP_AHA-CO-1|IP_AHA-C-3|IP_AHA-C-2|IP_AHA-C-1	2|5|22|0|2|9|0	40	7	0.17	0.00|0.00|0.97|0.00|0.00|0.00|0.00	9	0.1393	0.975	0.7538
MTA	TTHERM_00464990	IP_AHA-S-2|IP_AHA-S-1|IP_AHA-CO-2|IP_AHA-CO-1|IP_AHA-C-3|IP_AHA-C-2|IP_AHA-C-1	0|0|7|0|0|0|0	7	7	0.11	0.00|0.00|0.97|0.00|0.00|0.00|0.00	2	0.1393	0.975	0.7538
MRC1	TTHERM_00327340	IP_MRC1-S-3|IP_MRC1-S-2|IP_MRC1-S-1|IP_MRC1-CO-2|IP_MRC1-CO-1|IP_MRC1-C-1	0|0|0|2|0|0	2	6	0.12	0.00|0.00|0.00|0.77|0.00|0.00	0	0.1292	0.775	0.7539
MRC1	TTHERM_00049030	IP_MRC1-S-3|IP_MRC1-S-2|IP_MRC1-S-1|IP_MRC1-CO-2|IP_MRC1-CO-1|IP_MRC1-C-1	1|6|4|1|2|2	16	6	0.12	0.00|0.66|0.11|0.00|0.00|0.00	3	0.1292	0.6575	0.7539
MTA	TTHERM_001113129	IP_AHA-S-2|IP_AHA-S-1|IP_AHA-CO-2|IP_AHA-CO-1|IP_AHA-C-3|IP_AHA-C-2|IP_AHA-C-1	0|0|16|0|0|0|0	16	7	0.13	0.00|0.00|0.97|0.00|0.00|0.00|0.00	0	0.1389	0.9725	0.7543
MTA	TTHERM_00668060	IP_AHA-S-2|IP_AHA-S-1|IP_AHA-CO-2|IP_AHA-CO-1|IP_AHA-C-3|IP_AHA-C-2|IP_AHA-C-1	0|5|0|0|0|0|0	5	7	0.17	0.00|0.97|0.00|0.00|0.00|0.00|0.00	2	0.1386	0.97	0.7547
MRC1	TTHERM_00049070	IP_MRC1-S-3|IP_MRC1-S-2|IP_MRC1-S-1|IP_MRC1-CO-2|IP_MRC1-CO-1|IP_MRC1-C-1	0|0|0|0|0|2	2	6	0.1	0.00|0.00|0.00|0.00|0.00|0.77	0	0.1287	0.7725	0.7548
MRC1	TTHERM_01099110	IP_MRC1-S-3|IP_MRC1-S-2|IP_MRC1-S-1|IP_MRC1-CO-2|IP_MRC1-CO-1|IP_MRC1-C-1	0|0|2|0|0|0	2	6	0.15	0.00|0.00|0.77|0.00|0.00|0.00	0	0.1287	0.7725	0.7548
MTA	TTHERM_00325580	IP_AHA-S-2|IP_AHA-S-1|IP_AHA-CO-2|IP_AHA-CO-1|IP_AHA-C-3|IP_AHA-C-2|IP_AHA-C-1	0|0|15|0|0|0|0	15	7	0.15	0.00|0.00|0.97|0.00|0.00|0.00|0.00	0	0.1382	0.9675	0.7557
MTA	TTHERM_00299879	IP_AHA-S-2|IP_AHA-S-1|IP_AHA-CO-2|IP_AHA-CO-1|IP_AHA-C-3|IP_AHA-C-2|IP_AHA-C-1	0|0|0|0|16|0|0	16	7	0.11	0.00|0.00|0.00|0.00|0.97|0.00|0.00	0	0.1382	0.9675	0.7557
MRC1	TTHERM_00778410	IP_MRC1-S-3|IP_MRC1-S-2|IP_MRC1-S-1|IP_MRC1-CO-2|IP_MRC1-CO-1|IP_MRC1-C-1	0|0|0|0|0|2	2	6	0.1	0.00|0.00|0.00|0.00|0.00|0.77	0	0.1283	0.77	0.7557
MRC1	TTHERM_00079330	IP_MRC1-S-3|IP_MRC1-S-2|IP_MRC1-S-1|IP_MRC1-CO-2|IP_MRC1-CO-1|IP_MRC1-C-1	0|0|0|2|0|0	2	6	0.15	0.00|0.00|0.00|0.77|0.00|0.00	0	0.1283	0.77	0.7557
MTA	TTHERM_00823400	IP_AHA-S-2|IP_AHA-S-1|IP_AHA-CO-2|IP_AHA-CO-1|IP_AHA-C-3|IP_AHA-C-2|IP_AHA-C-1	0|0|0|0|9|0|0	9	7	0.13	0.00|0.00|0.00|0.00|0.96|0.00|0.00	0	0.1375	0.9625	0.7562
MRC1	TTHERM_00825210	IP_MRC1-S-3|IP_MRC1-S-2|IP_MRC1-S-1|IP_MRC1-CO-2|IP_MRC1-CO-1|IP_MRC1-C-1	0|0|2|0|0|0	2	6	0.15	0.00|0.00|0.77|0.00|0.00|0.00	0	0.1279	0.7675	0.7566
MRC1	TTHERM_00316050	IP_MRC1-S-3|IP_MRC1-S-2|IP_MRC1-S-1|IP_MRC1-CO-2|IP_MRC1-CO-1|IP_MRC1-C-1	0|0|0|2|0|0	2	6	0.1	0.00|0.00|0.00|0.77|0.00|0.00	0	0.1279	0.7675	0.7566
MTA	TTHERM_00475310	IP_AHA-S-2|IP_AHA-S-1|IP_AHA-CO-2|IP_AHA-CO-1|IP_AHA-C-3|IP_AHA-C-2|IP_AHA-C-1	2|16|3|1|1|3|1	27	7	0.11	0.00|0.96|0.00|0.00|0.00|0.00|0.00	9	0.1371	0.96	0.7575
MTA	TTHERM_00448800	IP_AHA-S-2|IP_AHA-S-1|IP_AHA-CO-2|IP_AHA-CO-1|IP_AHA-C-3|IP_AHA-C-2|IP_AHA-C-1	0|2|2|0|7|0|0	11	7	0.15	0.00|0.00|0.00|0.00|0.96|0.00|0.00	3	0.1371	0.96	0.7575
MTA	TTHERM_00471820	IP_AHA-S-2|IP_AHA-S-1|IP_AHA-CO-2|IP_AHA-CO-1|IP_AHA-C-3|IP_AHA-C-2|IP_AHA-C-1	0|0|11|0|0|7|0	18	7	0.13	0.00|0.00|0.90|0.00|0.00|0.06|0.00	5	0.1371	0.8975	0.7575
MTA	TTHERM_00137780	IP_AHA-S-2|IP_AHA-S-1|IP_AHA-CO-2|IP_AHA-CO-1|IP_AHA-C-3|IP_AHA-C-2|IP_AHA-C-1	0|0|0|0|11|0|0	11	7	0.14	0.00|0.00|0.00|0.00|0.96|0.00|0.00	0	0.1368	0.9575	0.758
MRC1	TTHERM_00302040	IP_MRC1-S-3|IP_MRC1-S-2|IP_MRC1-S-1|IP_MRC1-CO-2|IP_MRC1-CO-1|IP_MRC1-C-1	0|0|0|0|0|2	2	6	0.11	0.00|0.00|0.00|0.00|0.00|0.76	0	0.1275	0.765	0.7583
MRC1	TTHERM_00007520	IP_MRC1-S-3|IP_MRC1-S-2|IP_MRC1-S-1|IP_MRC1-CO-2|IP_MRC1-CO-1|IP_MRC1-C-1	0|0|0|2|0|0	2	6	0.16	0.00|0.00|0.00|0.76|0.00|0.00	0	0.1275	0.765	0.7583
MRC1	TTHERM_00522420	IP_MRC1-S-3|IP_MRC1-S-2|IP_MRC1-S-1|IP_MRC1-CO-2|IP_MRC1-CO-1|IP_MRC1-C-1	0|0|0|2|0|0	2	6	0.1	0.00|0.00|0.00|0.76|0.00|0.00	0	0.1275	0.765	0.7583
MRC1	TTHERM_00384800	IP_MRC1-S-3|IP_MRC1-S-2|IP_MRC1-S-1|IP_MRC1-CO-2|IP_MRC1-CO-1|IP_MRC1-C-1	0|1|0|4|3|0	8	6	0.12	0.00|0.00|0.00|0.72|0.04|0.00	2	0.1275	0.7225	0.7583
MRC1	TTHERM_00703880	IP_MRC1-S-3|IP_MRC1-S-2|IP_MRC1-S-1|IP_MRC1-CO-2|IP_MRC1-CO-1|IP_MRC1-C-1	3|0|0|0|0|0	3	6	0.13	0.76|0.00|0.00|0.00|0.00|0.00	0	0.1271	0.7625	0.7588
MTA	TTHERM_00522920	IP_AHA-S-2|IP_AHA-S-1|IP_AHA-CO-2|IP_AHA-CO-1|IP_AHA-C-3|IP_AHA-C-2|IP_AHA-C-1	0|0|0|0|6|0|0	6	7	0.13	0.00|0.00|0.00|0.00|0.95|0.00|0.00	0	0.1364	0.955	0.7593
MTA	TTHERM_00268000	IP_AHA-S-2|IP_AHA-S-1|IP_AHA-CO-2|IP_AHA-CO-1|IP_AHA-C-3|IP_AHA-C-2|IP_AHA-C-1	1|0|6|0|0|1|0	8	7	0.13	0.00|0.00|0.95|0.00|0.00|0.00|0.00	2	0.1364	0.9525	0.7593
MTA	TTHERM_00402120	IP_AHA-S-2|IP_AHA-S-1|IP_AHA-CO-2|IP_AHA-CO-1|IP_AHA-C-3|IP_AHA-C-2|IP_AHA-C-1	0|3|7|0|3|3|0	16	7	0.14	0.00|0.01|0.93|0.00|0.01|0.00|0.00	3	0.1364	0.9275	0.7593
MTA	TTHERM_00497960	IP_AHA-S-2|IP_AHA-S-1|IP_AHA-CO-2|IP_AHA-CO-1|IP_AHA-C-3|IP_AHA-C-2|IP_AHA-C-1	0|11|5|0|4|2|0	22	7	0.11	0.00|0.95|0.00|0.00|0.00|0.00|0.00	6	0.1361	0.9525	0.7598
MTA	TTHERM_00825230	IP_AHA-S-2|IP_AHA-S-1|IP_AHA-CO-2|IP_AHA-CO-1|IP_AHA-C-3|IP_AHA-C-2|IP_AHA-C-1	0|0|0|0|7|0|0	7	7	0.15	0.00|0.00|0.00|0.00|0.95|0.00|0.00	0	0.1357	0.95	0.7602
MRC1	TTHERM_00790680	IP_MRC1-S-3|IP_MRC1-S-2|IP_MRC1-S-1|IP_MRC1-CO-2|IP_MRC1-CO-1|IP_MRC1-C-1	0|0|0|2|0|0	2	6	0.11	0.00|0.00|0.00|0.76|0.00|0.00	0	0.1267	0.76	0.7605
MRC1	TTHERM_00592690	IP_MRC1-S-3|IP_MRC1-S-2|IP_MRC1-S-1|IP_MRC1-CO-2|IP_MRC1-CO-1|IP_MRC1-C-1	0|0|0|0|0|2	2	6	0.15	0.00|0.00|0.00|0.00|0.00|0.76	0	0.1267	0.76	0.7605
MRC1	TTHERM_00824040	IP_MRC1-S-3|IP_MRC1-S-2|IP_MRC1-S-1|IP_MRC1-CO-2|IP_MRC1-CO-1|IP_MRC1-C-1	0|0|0|2|0|0	2	6	0.13	0.00|0.00|0.00|0.76|0.00|0.00	0	0.1267	0.76	0.7605
MRC1	TTHERM_00895800	IP_MRC1-S-3|IP_MRC1-S-2|IP_MRC1-S-1|IP_MRC1-CO-2|IP_MRC1-CO-1|IP_MRC1-C-1	0|0|0|2|0|0	2	6	0.16	0.00|0.00|0.00|0.76|0.00|0.00	0	0.1267	0.76	0.7605
MTA	TTHERM_00143770	IP_AHA-S-2|IP_AHA-S-1|IP_AHA-CO-2|IP_AHA-CO-1|IP_AHA-C-3|IP_AHA-C-2|IP_AHA-C-1	0|0|0|0|0|8|0	8	7	0.14	0.00|0.00|0.00|0.00|0.00|0.94|0.00	0	0.1346	0.9425	0.7611
MTA	TTHERM_01119470	IP_AHA-S-2|IP_AHA-S-1|IP_AHA-CO-2|IP_AHA-CO-1|IP_AHA-C-3|IP_AHA-C-2|IP_AHA-C-1	0|0|9|0|0|0|0	9	7	0.17	0.00|0.00|0.94|0.00|0.00|0.00|0.00	0	0.1346	0.9425	0.7611
MRC1	TTHERM_00418580	IP_MRC1-S-3|IP_MRC1-S-2|IP_MRC1-S-1|IP_MRC1-CO-2|IP_MRC1-CO-1|IP_MRC1-C-1	0|0|2|0|0|0	2	6	0.13	0.00|0.00|0.76|0.00|0.00|0.00	0	0.1262	0.7575	0.7613
MRC1	TTHERM_00049060	IP_MRC1-S-3|IP_MRC1-S-2|IP_MRC1-S-1|IP_MRC1-CO-2|IP_MRC1-CO-1|IP_MRC1-C-1	0|0|0|0|0|2	2	6	0.12	0.00|0.00|0.00|0.00|0.00|0.76	0	0.1262	0.7575	0.7613
MTA	TTHERM_00263320	IP_AHA-S-2|IP_AHA-S-1|IP_AHA-CO-2|IP_AHA-CO-1|IP_AHA-C-3|IP_AHA-C-2|IP_AHA-C-1	0|0|0|0|0|7|0	7	7	0.13	0.00|0.00|0.00|0.00|0.00|0.94|0.00	0	0.1339	0.9375	0.762
MTA	TTHERM_00621550	IP_AHA-S-2|IP_AHA-S-1|IP_AHA-CO-2|IP_AHA-CO-1|IP_AHA-C-3|IP_AHA-C-2|IP_AHA-C-1	0|0|0|0|7|0|0	7	7	0.11	0.00|0.00|0.00|0.00|0.94|0.00|0.00	0	0.1339	0.9375	0.762
MRC1	TTHERM_00704010	IP_MRC1-S-3|IP_MRC1-S-2|IP_MRC1-S-1|IP_MRC1-CO-2|IP_MRC1-CO-1|IP_MRC1-C-1	0|0|0|0|3|0	3	6	0.12	0.00|0.00|0.00|0.00|0.75|0.00	0	0.1258	0.755	0.7621
MRC1	TTHERM_00406590	IP_MRC1-S-3|IP_MRC1-S-2|IP_MRC1-S-1|IP_MRC1-CO-2|IP_MRC1-CO-1|IP_MRC1-C-1	0|0|0|0|0|2	2	6	0.14	0.00|0.00|0.00|0.00|0.00|0.75	0	0.1258	0.755	0.7621
MTA	TTHERM_00721830	IP_AHA-S-2|IP_AHA-S-1|IP_AHA-CO-2|IP_AHA-CO-1|IP_AHA-C-3|IP_AHA-C-2|IP_AHA-C-1	0|0|0|0|9|0|0	9	7	0.13	0.00|0.00|0.00|0.00|0.93|0.00|0.00	0	0.1332	0.9325	0.7624
MRC1	TTHERM_00419990	IP_MRC1-S-3|IP_MRC1-S-2|IP_MRC1-S-1|IP_MRC1-CO-2|IP_MRC1-CO-1|IP_MRC1-C-1	0|0|0|2|0|0	2	6	0.11	0.00|0.00|0.00|0.75|0.00|0.00	0	0.1254	0.7525	0.7629
MRC1	TTHERM_01362500	IP_MRC1-S-3|IP_MRC1-S-2|IP_MRC1-S-1|IP_MRC1-CO-2|IP_MRC1-CO-1|IP_MRC1-C-1	0|0|0|2|0|0	2	6	0.15	0.00|0.00|0.00|0.75|0.00|0.00	0	0.1254	0.7525	0.7629
MTA	TTHERM_00329800	IP_AHA-S-2|IP_AHA-S-1|IP_AHA-CO-2|IP_AHA-CO-1|IP_AHA-C-3|IP_AHA-C-2|IP_AHA-C-1	0|0|6|0|0|0|0	6	7	0.14	0.00|0.00|0.93|0.00|0.00|0.00|0.00	0	0.1325	0.9275	0.7633
MTA	TTHERM_00661480	IP_AHA-S-2|IP_AHA-S-1|IP_AHA-CO-2|IP_AHA-CO-1|IP_AHA-C-3|IP_AHA-C-2|IP_AHA-C-1	0|0|13|0|28|0|0	41	7	0.11	0.00|0.00|0.00|0.00|0.93|0.00|0.00	15	0.1325	0.9275	0.7633
MTA	TTHERM_00361830	IP_AHA-S-2|IP_AHA-S-1|IP_AHA-CO-2|IP_AHA-CO-1|IP_AHA-C-3|IP_AHA-C-2|IP_AHA-C-1	0|0|0|0|6|0|0	6	7	0.13	0.00|0.00|0.00|0.00|0.92|0.00|0.00	0	0.1321	0.925	0.7637
MRC1	TTHERM_00780600	IP_MRC1-S-3|IP_MRC1-S-2|IP_MRC1-S-1|IP_MRC1-CO-2|IP_MRC1-CO-1|IP_MRC1-C-1	0|0|0|2|0|0	2	6	0.13	0.00|0.00|0.00|0.75|0.00|0.00	0	0.1246	0.7475	0.7641
MRC1	TTHERM_01082910	IP_MRC1-S-3|IP_MRC1-S-2|IP_MRC1-S-1|IP_MRC1-CO-2|IP_MRC1-CO-1|IP_MRC1-C-1	0|0|2|0|0|0	2	6	0.16	0.00|0.00|0.75|0.00|0.00|0.00	0	0.1246	0.7475	0.7641
MRC1	TTHERM_001091331	IP_MRC1-S-3|IP_MRC1-S-2|IP_MRC1-S-1|IP_MRC1-CO-2|IP_MRC1-CO-1|IP_MRC1-C-1	0|0|0|2|0|0	2	6	0.14	0.00|0.00|0.00|0.75|0.00|0.00	0	0.1246	0.7475	0.7641
MRC1	TTHERM_00073200	IP_MRC1-S-3|IP_MRC1-S-2|IP_MRC1-S-1|IP_MRC1-CO-2|IP_MRC1-CO-1|IP_MRC1-C-1	0|0|0|3|1|4	8	6	0.11	0.00|0.00|0.00|0.16|0.00|0.58	2	0.1246	0.585	0.7645
MTA	TTHERM_00853090	IP_AHA-S-2|IP_AHA-S-1|IP_AHA-CO-2|IP_AHA-CO-1|IP_AHA-C-3|IP_AHA-C-2|IP_AHA-C-1	0|0|9|0|0|0|0	9	7	0.14	0.00|0.00|0.92|0.00|0.00|0.00|0.00	0	0.1318	0.9225	0.765
MTA	TTHERM_00614680	IP_AHA-S-2|IP_AHA-S-1|IP_AHA-CO-2|IP_AHA-CO-1|IP_AHA-C-3|IP_AHA-C-2|IP_AHA-C-1	0|0|8|0|0|0|0	8	7	0.13	0.00|0.00|0.92|0.00|0.00|0.00|0.00	0	0.1318	0.9225	0.765
MTA	TTHERM_00220590	IP_AHA-S-2|IP_AHA-S-1|IP_AHA-CO-2|IP_AHA-CO-1|IP_AHA-C-3|IP_AHA-C-2|IP_AHA-C-1	0|0|6|0|0|0|0	6	7	0.11	0.00|0.00|0.92|0.00|0.00|0.00|0.00	0	0.1318	0.9225	0.765
MRC1	TTHERM_00637260	IP_MRC1-S-3|IP_MRC1-S-2|IP_MRC1-S-1|IP_MRC1-CO-2|IP_MRC1-CO-1|IP_MRC1-C-1	0|0|2|0|0|0	2	6	0.13	0.00|0.00|0.75|0.00|0.00|0.00	0	0.1242	0.745	0.7657
MRC1	TTHERM_00923170	IP_MRC1-S-3|IP_MRC1-S-2|IP_MRC1-S-1|IP_MRC1-CO-2|IP_MRC1-CO-1|IP_MRC1-C-1	0|0|0|0|0|2	2	6	0.12	0.00|0.00|0.00|0.00|0.00|0.75	0	0.1242	0.745	0.7657
MRC1	TTHERM_00095540	IP_MRC1-S-3|IP_MRC1-S-2|IP_MRC1-S-1|IP_MRC1-CO-2|IP_MRC1-CO-1|IP_MRC1-C-1	0|0|0|2|0|0	2	6	0.11	0.00|0.00|0.00|0.75|0.00|0.00	0	0.1242	0.745	0.7657
MTA	TTHERM_00671930	IP_AHA-S-2|IP_AHA-S-1|IP_AHA-CO-2|IP_AHA-CO-1|IP_AHA-C-3|IP_AHA-C-2|IP_AHA-C-1	0|6|0|0|0|0|0	6	7	0.14	0.00|0.92|0.00|0.00|0.00|0.00|0.00	0	0.1314	0.92	0.7658
MTA	TTHERM_00693010	IP_AHA-S-2|IP_AHA-S-1|IP_AHA-CO-2|IP_AHA-CO-1|IP_AHA-C-3|IP_AHA-C-2|IP_AHA-C-1	0|0|4|0|0|0|0	4	7	0.13	0.00|0.00|0.92|0.00|0.00|0.00|0.00	0	0.1314	0.92	0.7658
MRC1	TTHERM_00136510	IP_MRC1-S-3|IP_MRC1-S-2|IP_MRC1-S-1|IP_MRC1-CO-2|IP_MRC1-CO-1|IP_MRC1-C-1	0|0|0|2|0|0	2	6	0.1	0.00|0.00|0.00|0.74|0.00|0.00	0	0.1233	0.74	0.7665
MRC1	TTHERM_00464990	IP_MRC1-S-3|IP_MRC1-S-2|IP_MRC1-S-1|IP_MRC1-CO-2|IP_MRC1-CO-1|IP_MRC1-C-1	0|1|0|4|2|1	8	6	0.14	0.00|0.00|0.00|0.74|0.00|0.00	2	0.1233	0.7375	0.7665
MTA	TTHERM_00891260	IP_AHA-S-2|IP_AHA-S-1|IP_AHA-CO-2|IP_AHA-CO-1|IP_AHA-C-3|IP_AHA-C-2|IP_AHA-C-1	0|0|0|0|0|6|0	6	7	0.11	0.00|0.00|0.00|0.00|0.00|0.92|0.00	0	0.1311	0.9175	0.767
MTA	TTHERM_00088150	IP_AHA-S-2|IP_AHA-S-1|IP_AHA-CO-2|IP_AHA-CO-1|IP_AHA-C-3|IP_AHA-C-2|IP_AHA-C-1	0|0|0|0|6|0|0	6	7	0.12	0.00|0.00|0.00|0.00|0.92|0.00|0.00	0	0.1311	0.9175	0.767
MTA	TTHERM_00691410	IP_AHA-S-2|IP_AHA-S-1|IP_AHA-CO-2|IP_AHA-CO-1|IP_AHA-C-3|IP_AHA-C-2|IP_AHA-C-1	0|0|0|0|5|0|0	5	7	0.15	0.00|0.00|0.00|0.00|0.92|0.00|0.00	0	0.1311	0.9175	0.767
MTA	TTHERM_00294810	IP_AHA-S-2|IP_AHA-S-1|IP_AHA-CO-2|IP_AHA-CO-1|IP_AHA-C-3|IP_AHA-C-2|IP_AHA-C-1	0|0|0|0|3|0|0	3	7	0.12	0.00|0.00|0.00|0.00|0.91|0.00|0.00	0	0.1307	0.915	0.7678
MTA	TTHERM_00136240	IP_AHA-S-2|IP_AHA-S-1|IP_AHA-CO-2|IP_AHA-CO-1|IP_AHA-C-3|IP_AHA-C-2|IP_AHA-C-1	0|0|6|0|0|1|0	7	7	0.13	0.00|0.00|0.91|0.00|0.00|0.00|0.00	2	0.1307	0.915	0.7678
MRC1	TTHERM_00476510	IP_MRC1-S-3|IP_MRC1-S-2|IP_MRC1-S-1|IP_MRC1-CO-2|IP_MRC1-CO-1|IP_MRC1-C-1	0|0|0|2|0|0	2	6	0.11	0.00|0.00|0.00|0.74|0.00|0.00	0	0.1229	0.7375	0.768
MRC1	TTHERM_01124100	IP_MRC1-S-3|IP_MRC1-S-2|IP_MRC1-S-1|IP_MRC1-CO-2|IP_MRC1-CO-1|IP_MRC1-C-1	0|0|0|2|0|0	2	6	0.13	0.00|0.00|0.00|0.74|0.00|0.00	0	0.1229	0.7375	0.768
MRC1	TTHERM_00161740	IP_MRC1-S-3|IP_MRC1-S-2|IP_MRC1-S-1|IP_MRC1-CO-2|IP_MRC1-CO-1|IP_MRC1-C-1	0|0|0|2|0|0	2	6	0.11	0.00|0.00|0.00|0.74|0.00|0.00	0	0.1229	0.7375	0.768
MRC1	TTHERM_00446150	IP_MRC1-S-3|IP_MRC1-S-2|IP_MRC1-S-1|IP_MRC1-CO-2|IP_MRC1-CO-1|IP_MRC1-C-1	0|0|0|2|0|0	2	6	0.12	0.00|0.00|0.00|0.74|0.00|0.00	0	0.1229	0.7375	0.768
MRC1	TTHERM_00521980	IP_MRC1-S-3|IP_MRC1-S-2|IP_MRC1-S-1|IP_MRC1-CO-2|IP_MRC1-CO-1|IP_MRC1-C-1	0|0|0|2|0|0	2	6	0.09	0.00|0.00|0.00|0.73|0.00|0.00	0	0.1221	0.7325	0.7684
MTA	TTHERM_00586810	IP_AHA-S-2|IP_AHA-S-1|IP_AHA-CO-2|IP_AHA-CO-1|IP_AHA-C-3|IP_AHA-C-2|IP_AHA-C-1	0|9|0|0|0|0|0	9	7	0.13	0.00|0.91|0.00|0.00|0.00|0.00|0.00	0	0.1304	0.9125	0.7686
MTA	TTHERM_00530350	IP_AHA-S-2|IP_AHA-S-1|IP_AHA-CO-2|IP_AHA-CO-1|IP_AHA-C-3|IP_AHA-C-2|IP_AHA-C-1	0|15|6|0|23|1|2	47	7	0.15	0.00|0.00|0.00|0.00|0.91|0.00|0.00	13	0.1304	0.9125	0.7686
MRC1	TTHERM_00149850	IP_MRC1-S-3|IP_MRC1-S-2|IP_MRC1-S-1|IP_MRC1-CO-2|IP_MRC1-CO-1|IP_MRC1-C-1	0|0|0|2|0|0	2	6	0.11	0.00|0.00|0.00|0.73|0.00|0.00	0	0.1217	0.73	0.7695
MRC1	TTHERM_00494570	IP_MRC1-S-3|IP_MRC1-S-2|IP_MRC1-S-1|IP_MRC1-CO-2|IP_MRC1-CO-1|IP_MRC1-C-1	0|0|0|2|0|0	2	6	0.1	0.00|0.00|0.00|0.73|0.00|0.00	0	0.1217	0.73	0.7695
MRC1	TTHERM_00494580	IP_MRC1-S-3|IP_MRC1-S-2|IP_MRC1-S-1|IP_MRC1-CO-2|IP_MRC1-CO-1|IP_MRC1-C-1	0|0|0|2|0|0	2	6	0.11	0.00|0.00|0.00|0.73|0.00|0.00	0	0.1217	0.73	0.7695
MRC1	TTHERM_00161230	IP_MRC1-S-3|IP_MRC1-S-2|IP_MRC1-S-1|IP_MRC1-CO-2|IP_MRC1-CO-1|IP_MRC1-C-1	0|0|0|2|0|0	2	6	0.1	0.00|0.00|0.00|0.73|0.00|0.00	0	0.1212	0.7275	0.7699
MTA	TTHERM_00069420	IP_AHA-S-2|IP_AHA-S-1|IP_AHA-CO-2|IP_AHA-CO-1|IP_AHA-C-3|IP_AHA-C-2|IP_AHA-C-1	0|0|0|0|5|0|0	5	7	0.16	0.00|0.00|0.00|0.00|0.91|0.00|0.00	0	0.13	0.91	0.7702
MTA	TTHERM_00462870	IP_AHA-S-2|IP_AHA-S-1|IP_AHA-CO-2|IP_AHA-CO-1|IP_AHA-C-3|IP_AHA-C-2|IP_AHA-C-1	7|0|0|0|0|0|0	7	7	0.12	0.91|0.00|0.00|0.00|0.00|0.00|0.00	0	0.13	0.91	0.7702
MTA	TTHERM_00444330	IP_AHA-S-2|IP_AHA-S-1|IP_AHA-CO-2|IP_AHA-CO-1|IP_AHA-C-3|IP_AHA-C-2|IP_AHA-C-1	0|0|9|0|0|0|0	9	7	0.14	0.00|0.00|0.91|0.00|0.00|0.00|0.00	0	0.13	0.91	0.7702
MTA	TTHERM_00044990	IP_AHA-S-2|IP_AHA-S-1|IP_AHA-CO-2|IP_AHA-CO-1|IP_AHA-C-3|IP_AHA-C-2|IP_AHA-C-1	0|0|0|0|0|7|0	7	7	0.14	0.00|0.00|0.00|0.00|0.00|0.91|0.00	0	0.13	0.91	0.7702
MTA	TTHERM_00013640	IP_AHA-S-2|IP_AHA-S-1|IP_AHA-CO-2|IP_AHA-CO-1|IP_AHA-C-3|IP_AHA-C-2|IP_AHA-C-1	0|4|0|0|0|0|0	4	7	0.16	0.00|0.91|0.00|0.00|0.00|0.00|0.00	0	0.1296	0.9075	0.7705
MRC1	TTHERM_00784680	IP_MRC1-S-3|IP_MRC1-S-2|IP_MRC1-S-1|IP_MRC1-CO-2|IP_MRC1-CO-1|IP_MRC1-C-1	0|0|0|0|0|2	2	6	0.12	0.00|0.00|0.00|0.00|0.00|0.72	0	0.1208	0.725	0.7706
MRC1	TTHERM_000379123	IP_MRC1-S-3|IP_MRC1-S-2|IP_MRC1-S-1|IP_MRC1-CO-2|IP_MRC1-CO-1|IP_MRC1-C-1	0|0|0|2|0|0	2	6	0.11	0.00|0.00|0.00|0.72|0.00|0.00	0	0.1208	0.725	0.7706
MRC1	TTHERM_00576740	IP_MRC1-S-3|IP_MRC1-S-2|IP_MRC1-S-1|IP_MRC1-CO-2|IP_MRC1-CO-1|IP_MRC1-C-1	0|0|0|2|0|0	2	6	0.09	0.00|0.00|0.00|0.72|0.00|0.00	0	0.1204	0.7225	0.7714
MRC1	TTHERM_00185200	IP_MRC1-S-3|IP_MRC1-S-2|IP_MRC1-S-1|IP_MRC1-CO-2|IP_MRC1-CO-1|IP_MRC1-C-1	0|0|2|0|0|0	2	6	0.12	0.00|0.00|0.72|0.00|0.00|0.00	0	0.1204	0.7225	0.7714
MRC1	TTHERM_01075590	IP_MRC1-S-3|IP_MRC1-S-2|IP_MRC1-S-1|IP_MRC1-CO-2|IP_MRC1-CO-1|IP_MRC1-C-1	0|0|2|0|0|0	2	6	0.15	0.00|0.00|0.72|0.00|0.00|0.00	0	0.12	0.72	0.7717
MTA	TTHERM_00238830	IP_AHA-S-2|IP_AHA-S-1|IP_AHA-CO-2|IP_AHA-CO-1|IP_AHA-C-3|IP_AHA-C-2|IP_AHA-C-1	0|0|4|0|0|0|0	4	7	0.14	0.00|0.00|0.90|0.00|0.00|0.00|0.00	0	0.1293	0.905	0.7721
MTA	TTHERM_000028549	IP_AHA-S-2|IP_AHA-S-1|IP_AHA-CO-2|IP_AHA-CO-1|IP_AHA-C-3|IP_AHA-C-2|IP_AHA-C-1	0|0|0|0|5|0|0	5	7	0.15	0.00|0.00|0.00|0.00|0.90|0.00|0.00	0	0.1293	0.905	0.7721
MTA	TTHERM_00317230	IP_AHA-S-2|IP_AHA-S-1|IP_AHA-CO-2|IP_AHA-CO-1|IP_AHA-C-3|IP_AHA-C-2|IP_AHA-C-1	0|0|5|0|0|0|0	5	7	0.11	0.00|0.00|0.90|0.00|0.00|0.00|0.00	0	0.1293	0.905	0.7721
MTA	TTHERM_00616340	IP_AHA-S-2|IP_AHA-S-1|IP_AHA-CO-2|IP_AHA-CO-1|IP_AHA-C-3|IP_AHA-C-2|IP_AHA-C-1	0|6|0|0|0|0|0	6	7	0.12	0.00|0.90|0.00|0.00|0.00|0.00|0.00	0	0.1293	0.905	0.7721
MTA	TTHERM_00997670	IP_AHA-S-2|IP_AHA-S-1|IP_AHA-CO-2|IP_AHA-CO-1|IP_AHA-C-3|IP_AHA-C-2|IP_AHA-C-1	0|0|0|0|0|4|0	4	7	0.13	0.00|0.00|0.00|0.00|0.00|0.90|0.00	0	0.1289	0.9025	0.7724
MRC1	TTHERM_00195890	IP_MRC1-S-3|IP_MRC1-S-2|IP_MRC1-S-1|IP_MRC1-CO-2|IP_MRC1-CO-1|IP_MRC1-C-1	0|0|0|0|0|2	2	6	0.12	0.00|0.00|0.00|0.00|0.00|0.71	0	0.1192	0.715	0.7725
MRC1	TTHERM_00316160	IP_MRC1-S-3|IP_MRC1-S-2|IP_MRC1-S-1|IP_MRC1-CO-2|IP_MRC1-CO-1|IP_MRC1-C-1	0|0|0|0|3|0	3	6	0.1	0.00|0.00|0.00|0.00|0.71|0.00	0	0.1192	0.715	0.7725
MTA	TTHERM_00058880	IP_AHA-S-2|IP_AHA-S-1|IP_AHA-CO-2|IP_AHA-CO-1|IP_AHA-C-3|IP_AHA-C-2|IP_AHA-C-1	0|0|5|0|0|0|0	5	7	0.11	0.00|0.00|0.90|0.00|0.00|0.00|0.00	0	0.1286	0.9	0.7728
MTA	TTHERM_00357080	IP_AHA-S-2|IP_AHA-S-1|IP_AHA-CO-2|IP_AHA-CO-1|IP_AHA-C-3|IP_AHA-C-2|IP_AHA-C-1	0|0|0|0|0|3|0	3	7	0.14	0.00|0.00|0.00|0.00|0.00|0.90|0.00	0	0.1282	0.8975	0.7732
MRC1	TTHERM_00355550	IP_MRC1-S-3|IP_MRC1-S-2|IP_MRC1-S-1|IP_MRC1-CO-2|IP_MRC1-CO-1|IP_MRC1-C-1	0|0|0|2|0|0	2	6	0.13	0.00|0.00|0.00|0.71|0.00|0.00	0	0.1187	0.7125	0.7732
MRC1	TTHERM_01108700	IP_MRC1-S-3|IP_MRC1-S-2|IP_MRC1-S-1|IP_MRC1-CO-2|IP_MRC1-CO-1|IP_MRC1-C-1	0|0|0|0|0|2	2	6	0.12	0.00|0.00|0.00|0.00|0.00|0.71	0	0.1187	0.7125	0.7732
MRC1	TTHERM_00011440	IP_MRC1-S-3|IP_MRC1-S-2|IP_MRC1-S-1|IP_MRC1-CO-2|IP_MRC1-CO-1|IP_MRC1-C-1	0|0|0|0|0|2	2	6	0.1	0.00|0.00|0.00|0.00|0.00|0.71	0	0.1179	0.7075	0.7735
MRC1	TTHERM_00312760	IP_MRC1-S-3|IP_MRC1-S-2|IP_MRC1-S-1|IP_MRC1-CO-2|IP_MRC1-CO-1|IP_MRC1-C-1	2|0|0|0|0|0	2	6	0.11	0.70|0.00|0.00|0.00|0.00|0.00	0	0.1175	0.705	0.7739
MTA	TTHERM_00735340	IP_AHA-S-2|IP_AHA-S-1|IP_AHA-CO-2|IP_AHA-CO-1|IP_AHA-C-3|IP_AHA-C-2|IP_AHA-C-1	7|0|0|0|0|0|0	7	7	0.13	0.89|0.00|0.00|0.00|0.00|0.00|0.00	0	0.1279	0.895	0.7746
MTA	TTHERM_00579319	IP_AHA-S-2|IP_AHA-S-1|IP_AHA-CO-2|IP_AHA-CO-1|IP_AHA-C-3|IP_AHA-C-2|IP_AHA-C-1	0|0|0|0|4|0|0	4	7	0.12	0.00|0.00|0.00|0.00|0.89|0.00|0.00	0	0.1279	0.895	0.7746
MTA	TTHERM_01125120	IP_AHA-S-2|IP_AHA-S-1|IP_AHA-CO-2|IP_AHA-CO-1|IP_AHA-C-3|IP_AHA-C-2|IP_AHA-C-1	19|0|0|0|0|0|0	19	7	0.12	0.89|0.00|0.00|0.00|0.00|0.00|0.00	0	0.1279	0.895	0.7746
MTA	TTHERM_00780490	IP_AHA-S-2|IP_AHA-S-1|IP_AHA-CO-2|IP_AHA-CO-1|IP_AHA-C-3|IP_AHA-C-2|IP_AHA-C-1	0|0|0|0|0|4|0	4	7	0.14	0.00|0.00|0.00|0.00|0.00|0.89|0.00	0	0.1279	0.895	0.7746
MRC1	TTHERM_00254530	IP_MRC1-S-3|IP_MRC1-S-2|IP_MRC1-S-1|IP_MRC1-CO-2|IP_MRC1-CO-1|IP_MRC1-C-1	0|2|0|0|0|0	2	6	0.12	0.00|0.70|0.00|0.00|0.00|0.00	0	0.1167	0.7	0.7753
MRC1	TTHERM_00470548	IP_MRC1-S-3|IP_MRC1-S-2|IP_MRC1-S-1|IP_MRC1-CO-2|IP_MRC1-CO-1|IP_MRC1-C-1	0|0|2|0|0|0	2	6	0.12	0.00|0.00|0.70|0.00|0.00|0.00	0	0.1167	0.7	0.7753
MRC1	TTHERM_00317400	IP_MRC1-S-3|IP_MRC1-S-2|IP_MRC1-S-1|IP_MRC1-CO-2|IP_MRC1-CO-1|IP_MRC1-C-1	0|0|0|2|0|0	2	6	0.09	0.00|0.00|0.00|0.70|0.00|0.00	0	0.1167	0.7	0.7753
MRC1	TTHERM_00481220	IP_MRC1-S-3|IP_MRC1-S-2|IP_MRC1-S-1|IP_MRC1-CO-2|IP_MRC1-CO-1|IP_MRC1-C-1	0|2|0|0|0|0	2	6	0.1	0.00|0.70|0.00|0.00|0.00|0.00	0	0.1167	0.7	0.7753
MRC1	TTHERM_00125090	IP_MRC1-S-3|IP_MRC1-S-2|IP_MRC1-S-1|IP_MRC1-CO-2|IP_MRC1-CO-1|IP_MRC1-C-1	2|0|0|0|0|0	2	6	0.12	0.69|0.00|0.00|0.00|0.00|0.00	0	0.1158	0.695	0.7757
MTA	TTHERM_00112700	IP_AHA-S-2|IP_AHA-S-1|IP_AHA-CO-2|IP_AHA-CO-1|IP_AHA-C-3|IP_AHA-C-2|IP_AHA-C-1	0|0|4|0|0|0|0	4	7	0.14	0.00|0.00|0.89|0.00|0.00|0.00|0.00	0	0.1275	0.8925	0.776
MTA	TTHERM_00142330	IP_AHA-S-2|IP_AHA-S-1|IP_AHA-CO-2|IP_AHA-CO-1|IP_AHA-C-3|IP_AHA-C-2|IP_AHA-C-1	0|0|5|0|0|0|0	5	7	0.1	0.00|0.00|0.89|0.00|0.00|0.00|0.00	0	0.1275	0.8925	0.776
MTA	TTHERM_00144840	IP_AHA-S-2|IP_AHA-S-1|IP_AHA-CO-2|IP_AHA-CO-1|IP_AHA-C-3|IP_AHA-C-2|IP_AHA-C-1	0|0|5|0|0|0|0	5	7	0.12	0.00|0.00|0.89|0.00|0.00|0.00|0.00	0	0.1275	0.8925	0.776
MTA	TTHERM_01119420	IP_AHA-S-2|IP_AHA-S-1|IP_AHA-CO-2|IP_AHA-CO-1|IP_AHA-C-3|IP_AHA-C-2|IP_AHA-C-1	0|0|0|0|5|0|0	5	7	0.13	0.00|0.00|0.00|0.00|0.89|0.00|0.00	0	0.1275	0.8925	0.776
MRC1	TTHERM_01043150	IP_MRC1-S-3|IP_MRC1-S-2|IP_MRC1-S-1|IP_MRC1-CO-2|IP_MRC1-CO-1|IP_MRC1-C-1	0|0|2|0|0|0	2	6	0.09	0.00|0.00|0.69|0.00|0.00|0.00	0	0.1142	0.685	0.776
MTA	TTHERM_000585349	IP_AHA-S-2|IP_AHA-S-1|IP_AHA-CO-2|IP_AHA-CO-1|IP_AHA-C-3|IP_AHA-C-2|IP_AHA-C-1	0|0|4|0|0|0|0	4	7	0.13	0.00|0.00|0.89|0.00|0.00|0.00|0.00	0	0.1271	0.89	0.7764
MRC1	TTHERM_00697370	IP_MRC1-S-3|IP_MRC1-S-2|IP_MRC1-S-1|IP_MRC1-CO-2|IP_MRC1-CO-1|IP_MRC1-C-1	0|2|0|0|0|0	2	6	0.11	0.00|0.68|0.00|0.00|0.00|0.00	0	0.1138	0.6825	0.7767
MRC1	TTHERM_00706330	IP_MRC1-S-3|IP_MRC1-S-2|IP_MRC1-S-1|IP_MRC1-CO-2|IP_MRC1-CO-1|IP_MRC1-C-1	0|1|0|1|5|0	7	6	0.11	0.00|0.00|0.00|0.00|0.68|0.00	2	0.1138	0.68	0.7767
MRC1	TTHERM_00266190	IP_MRC1-S-3|IP_MRC1-S-2|IP_MRC1-S-1|IP_MRC1-CO-2|IP_MRC1-CO-1|IP_MRC1-C-1	0|2|0|0|0|0	2	6	0.13	0.00|0.68|0.00|0.00|0.00|0.00	0	0.1133	0.68	0.7771
MTA	TTHERM_00266400	IP_AHA-S-2|IP_AHA-S-1|IP_AHA-CO-2|IP_AHA-CO-1|IP_AHA-C-3|IP_AHA-C-2|IP_AHA-C-1	0|0|4|0|0|0|0	4	7	0.13	0.00|0.00|0.89|0.00|0.00|0.00|0.00	0	0.1268	0.8875	0.7774
MTA	TTHERM_00997520	IP_AHA-S-2|IP_AHA-S-1|IP_AHA-CO-2|IP_AHA-CO-1|IP_AHA-C-3|IP_AHA-C-2|IP_AHA-C-1	0|0|5|0|0|0|0	5	7	0.13	0.00|0.00|0.89|0.00|0.00|0.00|0.00	0	0.1268	0.8875	0.7774
MTA	TTHERM_00543590	IP_AHA-S-2|IP_AHA-S-1|IP_AHA-CO-2|IP_AHA-CO-1|IP_AHA-C-3|IP_AHA-C-2|IP_AHA-C-1	4|0|0|0|0|0|0	4	7	0.13	0.89|0.00|0.00|0.00|0.00|0.00|0.00	2	0.1268	0.8875	0.7774
MRC1	TTHERM_00195880	IP_MRC1-S-3|IP_MRC1-S-2|IP_MRC1-S-1|IP_MRC1-CO-2|IP_MRC1-CO-1|IP_MRC1-C-1	0|0|0|0|2|0	2	6	0.13	0.00|0.00|0.00|0.00|0.67|0.00	0	0.1117	0.67	0.7774
MRC1	TTHERM_00393040	IP_MRC1-S-3|IP_MRC1-S-2|IP_MRC1-S-1|IP_MRC1-CO-2|IP_MRC1-CO-1|IP_MRC1-C-1	0|4|0|25|6|5	40	6	0.13	0.00|0.00|0.00|0.67|0.00|0.00	17	0.1112	0.6675	0.7781
MRC1	TTHERM_00670640	IP_MRC1-S-3|IP_MRC1-S-2|IP_MRC1-S-1|IP_MRC1-CO-2|IP_MRC1-CO-1|IP_MRC1-C-1	0|2|0|0|0|0	2	6	0.09	0.00|0.67|0.00|0.00|0.00|0.00	0	0.1112	0.6675	0.7781
MRC1	TTHERM_00149260	IP_MRC1-S-3|IP_MRC1-S-2|IP_MRC1-S-1|IP_MRC1-CO-2|IP_MRC1-CO-1|IP_MRC1-C-1	0|2|0|0|0|0	2	6	0.1	0.00|0.66|0.00|0.00|0.00|0.00	0	0.1108	0.665	0.7785
MTA	TTHERM_00812950	IP_AHA-S-2|IP_AHA-S-1|IP_AHA-CO-2|IP_AHA-CO-1|IP_AHA-C-3|IP_AHA-C-2|IP_AHA-C-1	0|0|0|0|5|0|0	5	7	0.12	0.00|0.00|0.00|0.00|0.88|0.00|0.00	0	0.1264	0.885	0.7788
MTA	TTHERM_000011759	IP_AHA-S-2|IP_AHA-S-1|IP_AHA-CO-2|IP_AHA-CO-1|IP_AHA-C-3|IP_AHA-C-2|IP_AHA-C-1	0|0|0|0|4|0|0	4	7	0.11	0.00|0.00|0.00|0.00|0.88|0.00|0.00	0	0.1264	0.885	0.7788
MTA	TTHERM_00136440	IP_AHA-S-2|IP_AHA-S-1|IP_AHA-CO-2|IP_AHA-CO-1|IP_AHA-C-3|IP_AHA-C-2|IP_AHA-C-1	0|0|4|0|0|0|0	4	7	0.13	0.00|0.00|0.88|0.00|0.00|0.00|0.00	0	0.1264	0.885	0.7788
MTA	TTHERM_000579350	IP_AHA-S-2|IP_AHA-S-1|IP_AHA-CO-2|IP_AHA-CO-1|IP_AHA-C-3|IP_AHA-C-2|IP_AHA-C-1	0|0|0|0|4|0|0	4	7	0.12	0.00|0.00|0.00|0.00|0.88|0.00|0.00	0	0.1264	0.885	0.7788
MTA	TTHERM_00497310	IP_AHA-S-2|IP_AHA-S-1|IP_AHA-CO-2|IP_AHA-CO-1|IP_AHA-C-3|IP_AHA-C-2|IP_AHA-C-1	4|0|0|0|0|0|0	4	7	0.15	0.88|0.00|0.00|0.00|0.00|0.00|0.00	0	0.1261	0.8825	0.7791
MRC1	TTHERM_00494370	IP_MRC1-S-3|IP_MRC1-S-2|IP_MRC1-S-1|IP_MRC1-CO-2|IP_MRC1-CO-1|IP_MRC1-C-1	0|0|0|0|2|0	2	6	0.12	0.00|0.00|0.00|0.00|0.66|0.00	0	0.1104	0.6625	0.7792
MRC1	TTHERM_00865290	IP_MRC1-S-3|IP_MRC1-S-2|IP_MRC1-S-1|IP_MRC1-CO-2|IP_MRC1-CO-1|IP_MRC1-C-1	0|0|0|0|2|0	2	6	0.11	0.00|0.00|0.00|0.00|0.66|0.00	0	0.1104	0.6625	0.7792
MTA	TTHERM_00249870	IP_AHA-S-2|IP_AHA-S-1|IP_AHA-CO-2|IP_AHA-CO-1|IP_AHA-C-3|IP_AHA-C-2|IP_AHA-C-1	0|0|0|0|3|0|0	3	7	0.11	0.00|0.00|0.00|0.00|0.88|0.00|0.00	0	0.1257	0.88	0.7794
MRC1	TTHERM_00770740	IP_MRC1-S-3|IP_MRC1-S-2|IP_MRC1-S-1|IP_MRC1-CO-2|IP_MRC1-CO-1|IP_MRC1-C-1	0|0|0|0|2|0	2	6	0.12	0.00|0.00|0.00|0.00|0.66|0.00	0	0.11	0.66	0.7795
MTA	TTHERM_00824070	IP_AHA-S-2|IP_AHA-S-1|IP_AHA-CO-2|IP_AHA-CO-1|IP_AHA-C-3|IP_AHA-C-2|IP_AHA-C-1	0|0|4|0|0|0|0	4	7	0.13	0.00|0.00|0.88|0.00|0.00|0.00|0.00	0	0.1254	0.8775	0.7798
MRC1	TTHERM_000041629	IP_MRC1-S-3|IP_MRC1-S-2|IP_MRC1-S-1|IP_MRC1-CO-2|IP_MRC1-CO-1|IP_MRC1-C-1	0|0|0|0|2|0	2	6	0.1	0.00|0.00|0.00|0.00|0.65|0.00	0	0.1092	0.655	0.7799
MRC1	TTHERM_00657230	IP_MRC1-S-3|IP_MRC1-S-2|IP_MRC1-S-1|IP_MRC1-CO-2|IP_MRC1-CO-1|IP_MRC1-C-1	0|2|0|0|0|0	2	6	0.1	0.00|0.65|0.00|0.00|0.00|0.00	0	0.1083	0.65	0.7802
MRC1	TTHERM_00429700	IP_MRC1-S-3|IP_MRC1-S-2|IP_MRC1-S-1|IP_MRC1-CO-2|IP_MRC1-CO-1|IP_MRC1-C-1	0|0|0|0|2|0	2	6	0.11	0.00|0.00|0.00|0.00|0.64|0.00	0	0.1071	0.6425	0.7812
MRC1	TTHERM_01108620	IP_MRC1-S-3|IP_MRC1-S-2|IP_MRC1-S-1|IP_MRC1-CO-2|IP_MRC1-CO-1|IP_MRC1-C-1	0|0|0|0|2|0	2	6	0.12	0.00|0.00|0.00|0.00|0.64|0.00	0	0.1071	0.6425	0.7812
MRC1	TTHERM_00302100	IP_MRC1-S-3|IP_MRC1-S-2|IP_MRC1-S-1|IP_MRC1-CO-2|IP_MRC1-CO-1|IP_MRC1-C-1	0|3|0|0|1|4	8	6	0.12	0.00|0.05|0.00|0.00|0.00|0.59	2	0.1071	0.5875	0.7812
MTA	TTHERM_01034460	IP_AHA-S-2|IP_AHA-S-1|IP_AHA-CO-2|IP_AHA-CO-1|IP_AHA-C-3|IP_AHA-C-2|IP_AHA-C-1	0|0|4|0|0|0|0	4	7	0.1	0.00|0.00|0.88|0.00|0.00|0.00|0.00	0	0.125	0.875	0.7817
MTA	TTHERM_00085100	IP_AHA-S-2|IP_AHA-S-1|IP_AHA-CO-2|IP_AHA-CO-1|IP_AHA-C-3|IP_AHA-C-2|IP_AHA-C-1	0|0|4|0|0|0|0	4	7	0.13	0.00|0.00|0.88|0.00|0.00|0.00|0.00	0	0.125	0.875	0.7817
MTA	TTHERM_01394370	IP_AHA-S-2|IP_AHA-S-1|IP_AHA-CO-2|IP_AHA-CO-1|IP_AHA-C-3|IP_AHA-C-2|IP_AHA-C-1	0|0|4|0|0|0|0	4	7	0.11	0.00|0.00|0.88|0.00|0.00|0.00|0.00	0	0.125	0.875	0.7817
MTA	TTHERM_01020680	IP_AHA-S-2|IP_AHA-S-1|IP_AHA-CO-2|IP_AHA-CO-1|IP_AHA-C-3|IP_AHA-C-2|IP_AHA-C-1	0|0|5|0|0|0|0	5	7	0.15	0.00|0.00|0.88|0.00|0.00|0.00|0.00	0	0.125	0.875	0.7817
MTA	TTHERM_001166292	IP_AHA-S-2|IP_AHA-S-1|IP_AHA-CO-2|IP_AHA-CO-1|IP_AHA-C-3|IP_AHA-C-2|IP_AHA-C-1	0|0|3|0|0|0|0	3	7	0.1	0.00|0.00|0.88|0.00|0.00|0.00|0.00	0	0.125	0.875	0.7817
MTA	TTHERM_00455100	IP_AHA-S-2|IP_AHA-S-1|IP_AHA-CO-2|IP_AHA-CO-1|IP_AHA-C-3|IP_AHA-C-2|IP_AHA-C-1	0|0|5|0|0|0|0	5	7	0.12	0.00|0.00|0.88|0.00|0.00|0.00|0.00	0	0.125	0.875	0.7817
MRC1	TTHERM_00030200	IP_MRC1-S-3|IP_MRC1-S-2|IP_MRC1-S-1|IP_MRC1-CO-2|IP_MRC1-CO-1|IP_MRC1-C-1	0|0|0|0|2|0	2	6	0.11	0.00|0.00|0.00|0.00|0.64|0.00	0	0.1067	0.64	0.7819
MRC1	TTHERM_01084110	IP_MRC1-S-3|IP_MRC1-S-2|IP_MRC1-S-1|IP_MRC1-CO-2|IP_MRC1-CO-1|IP_MRC1-C-1	0|0|0|0|3|4	7	6	0.14	0.00|0.00|0.00|0.00|0.04|0.60	2	0.1067	0.5975	0.7819
MRC1	TTHERM_000437538	IP_MRC1-S-3|IP_MRC1-S-2|IP_MRC1-S-1|IP_MRC1-CO-2|IP_MRC1-CO-1|IP_MRC1-C-1	0|2|0|0|0|0	2	6	0.1	0.00|0.64|0.00|0.00|0.00|0.00	0	0.1062	0.6375	0.7823
MRC1	TTHERM_00023980	IP_MRC1-S-3|IP_MRC1-S-2|IP_MRC1-S-1|IP_MRC1-CO-2|IP_MRC1-CO-1|IP_MRC1-C-1	0|1|4|0|3|0	8	6	0.11	0.00|0.00|0.56|0.00|0.07|0.00	2	0.105	0.5575	0.7826
MRC1	TTHERM_000160999	IP_MRC1-S-3|IP_MRC1-S-2|IP_MRC1-S-1|IP_MRC1-CO-2|IP_MRC1-CO-1|IP_MRC1-C-1	0|0|0|0|2|0	2	6	0.12	0.00|0.00|0.00|0.00|0.63|0.00	0	0.1046	0.6275	0.7833
MRC1	TTHERM_00264760	IP_MRC1-S-3|IP_MRC1-S-2|IP_MRC1-S-1|IP_MRC1-CO-2|IP_MRC1-CO-1|IP_MRC1-C-1	0|0|0|0|2|0	2	6	0.07	0.00|0.00|0.00|0.00|0.63|0.00	0	0.1046	0.6275	0.7833
MRC1	TTHERM_000686019	IP_MRC1-S-3|IP_MRC1-S-2|IP_MRC1-S-1|IP_MRC1-CO-2|IP_MRC1-CO-1|IP_MRC1-C-1	0|0|0|0|2|0	2	6	0.12	0.00|0.00|0.00|0.00|0.62|0.00	0	0.1037	0.6225	0.7836
MTA	TTHERM_00393040	IP_AHA-S-2|IP_AHA-S-1|IP_AHA-CO-2|IP_AHA-CO-1|IP_AHA-C-3|IP_AHA-C-2|IP_AHA-C-1	0|11|11|0|28|1|1	52	7	0.1	0.00|0.00|0.00|0.00|0.87|0.00|0.00	17	0.1246	0.8725	0.7839
MTA	TTHERM_00850630	IP_AHA-S-2|IP_AHA-S-1|IP_AHA-CO-2|IP_AHA-CO-1|IP_AHA-C-3|IP_AHA-C-2|IP_AHA-C-1	0|0|0|0|0|3|0	3	7	0.12	0.00|0.00|0.00|0.00|0.00|0.87|0.00	0	0.1246	0.8725	0.7839
MTA	TTHERM_00245200	IP_AHA-S-2|IP_AHA-S-1|IP_AHA-CO-2|IP_AHA-CO-1|IP_AHA-C-3|IP_AHA-C-2|IP_AHA-C-1	0|0|0|0|4|0|0	4	7	0.16	0.00|0.00|0.00|0.00|0.87|0.00|0.00	0	0.1246	0.8725	0.7839
MTA	TTHERM_00678260	IP_AHA-S-2|IP_AHA-S-1|IP_AHA-CO-2|IP_AHA-CO-1|IP_AHA-C-3|IP_AHA-C-2|IP_AHA-C-1	0|0|0|0|0|4|0	4	7	0.12	0.00|0.00|0.00|0.00|0.00|0.87|0.00	0	0.1246	0.8725	0.7839
MTA	TTHERM_00825210	IP_AHA-S-2|IP_AHA-S-1|IP_AHA-CO-2|IP_AHA-CO-1|IP_AHA-C-3|IP_AHA-C-2|IP_AHA-C-1	0|0|0|0|0|3|0	3	7	0.12	0.00|0.00|0.00|0.00|0.00|0.87|0.00	0	0.1246	0.8725	0.7839
MTA	TTHERM_001035761	IP_AHA-S-2|IP_AHA-S-1|IP_AHA-CO-2|IP_AHA-CO-1|IP_AHA-C-3|IP_AHA-C-2|IP_AHA-C-1	0|0|0|0|4|0|0	4	7	0.11	0.00|0.00|0.00|0.00|0.87|0.00|0.00	0	0.1246	0.8725	0.7839
MTA	TTHERM_00637600	IP_AHA-S-2|IP_AHA-S-1|IP_AHA-CO-2|IP_AHA-CO-1|IP_AHA-C-3|IP_AHA-C-2|IP_AHA-C-1	0|0|5|0|0|0|0	5	7	0.11	0.00|0.00|0.87|0.00|0.00|0.00|0.00	0	0.1246	0.8725	0.7839
MRC1	TTHERM_00218410	IP_MRC1-S-3|IP_MRC1-S-2|IP_MRC1-S-1|IP_MRC1-CO-2|IP_MRC1-CO-1|IP_MRC1-C-1	0|0|0|4|0|1	5	6	0.07	0.00|0.00|0.00|0.61|0.00|0.00	2	0.1025	0.6125	0.784
MRC1	TTHERM_00530680	IP_MRC1-S-3|IP_MRC1-S-2|IP_MRC1-S-1|IP_MRC1-CO-2|IP_MRC1-CO-1|IP_MRC1-C-1	0|0|0|1|0|4	5	6	0.11	0.00|0.00|0.00|0.00|0.00|0.61	2	0.1012	0.6075	0.7843
MRC1	TTHERM_00957610	IP_MRC1-S-3|IP_MRC1-S-2|IP_MRC1-S-1|IP_MRC1-CO-2|IP_MRC1-CO-1|IP_MRC1-C-1	0|0|0|0|2|0	2	6	0.09	0.00|0.00|0.00|0.00|0.60|0.00	0	0.1004	0.6025	0.7847
MRC1	TTHERM_00770600	IP_MRC1-S-3|IP_MRC1-S-2|IP_MRC1-S-1|IP_MRC1-CO-2|IP_MRC1-CO-1|IP_MRC1-C-1	0|1|0|4|6|0	11	6	0.1	0.00|0.00|0.00|0.12|0.47|0.00	3	0.0992	0.475	0.785
MTA	TTHERM_00225860	IP_AHA-S-2|IP_AHA-S-1|IP_AHA-CO-2|IP_AHA-CO-1|IP_AHA-C-3|IP_AHA-C-2|IP_AHA-C-1	0|0|3|0|0|0|0	3	7	0.12	0.00|0.00|0.87|0.00|0.00|0.00|0.00	0	0.1243	0.87	0.7851
MTA	TTHERM_00444610	IP_AHA-S-2|IP_AHA-S-1|IP_AHA-CO-2|IP_AHA-CO-1|IP_AHA-C-3|IP_AHA-C-2|IP_AHA-C-1	0|0|0|0|4|0|0	4	7	0.1	0.00|0.00|0.00|0.00|0.87|0.00|0.00	0	0.1243	0.87	0.7851
MTA	TTHERM_001035531	IP_AHA-S-2|IP_AHA-S-1|IP_AHA-CO-2|IP_AHA-CO-1|IP_AHA-C-3|IP_AHA-C-2|IP_AHA-C-1	0|0|0|0|0|4|0	4	7	0.1	0.00|0.00|0.00|0.00|0.00|0.87|0.00	0	0.1243	0.87	0.7851
MTA	TTHERM_00194600	IP_AHA-S-2|IP_AHA-S-1|IP_AHA-CO-2|IP_AHA-CO-1|IP_AHA-C-3|IP_AHA-C-2|IP_AHA-C-1	0|4|0|0|0|0|0	4	7	0.11	0.00|0.87|0.00|0.00|0.00|0.00|0.00	0	0.1243	0.87	0.7851
MRC1	TTHERM_00133690	IP_MRC1-S-3|IP_MRC1-S-2|IP_MRC1-S-1|IP_MRC1-CO-2|IP_MRC1-CO-1|IP_MRC1-C-1	0|0|0|1|0|5	6	6	0.09	0.00|0.00|0.00|0.00|0.00|0.56	3	0.0942	0.565	0.7854
MRC1	TTHERM_00686220	IP_MRC1-S-3|IP_MRC1-S-2|IP_MRC1-S-1|IP_MRC1-CO-2|IP_MRC1-CO-1|IP_MRC1-C-1	0|18|8|3|41|4	74	6	0.09	0.00|0.00|0.00|0.00|0.45|0.00	22	0.0754	0.4525	0.7858
MRC1	TTHERM_00301740	IP_MRC1-S-3|IP_MRC1-S-2|IP_MRC1-S-1|IP_MRC1-CO-2|IP_MRC1-CO-1|IP_MRC1-C-1	0|4|5|0|1|0	10	6	0.07	0.00|0.01|0.39|0.00|0.00|0.00	3	0.0675	0.395	0.7862
MRC1	TTHERM_00794110	IP_MRC1-S-3|IP_MRC1-S-2|IP_MRC1-S-1|IP_MRC1-CO-2|IP_MRC1-CO-1|IP_MRC1-C-1	0|2|2|0|3|4	11	6	0.08	0.00|0.01|0.01|0.00|0.05|0.33	2	0.0667	0.335	0.7866
MTA	TTHERM_01050580	IP_AHA-S-2|IP_AHA-S-1|IP_AHA-CO-2|IP_AHA-CO-1|IP_AHA-C-3|IP_AHA-C-2|IP_AHA-C-1	0|0|3|0|0|0|0	3	7	0.13	0.00|0.00|0.87|0.00|0.00|0.00|0.00	0	0.1239	0.8675	0.7868
MTA	TTHERM_00486530	IP_AHA-S-2|IP_AHA-S-1|IP_AHA-CO-2|IP_AHA-CO-1|IP_AHA-C-3|IP_AHA-C-2|IP_AHA-C-1	0|4|0|0|0|0|0	4	7	0.15	0.00|0.87|0.00|0.00|0.00|0.00|0.00	0	0.1239	0.8675	0.7868
MTA	TTHERM_00016270	IP_AHA-S-2|IP_AHA-S-1|IP_AHA-CO-2|IP_AHA-CO-1|IP_AHA-C-3|IP_AHA-C-2|IP_AHA-C-1	0|0|5|0|0|0|0	5	7	0.14	0.00|0.00|0.87|0.00|0.00|0.00|0.00	0	0.1239	0.8675	0.7868
MTA	TTHERM_00584930	IP_AHA-S-2|IP_AHA-S-1|IP_AHA-CO-2|IP_AHA-CO-1|IP_AHA-C-3|IP_AHA-C-2|IP_AHA-C-1	4|0|0|0|0|0|0	4	7	0.1	0.87|0.00|0.00|0.00|0.00|0.00|0.00	0	0.1239	0.8675	0.7868
MTA	TTHERM_000849319	IP_AHA-S-2|IP_AHA-S-1|IP_AHA-CO-2|IP_AHA-CO-1|IP_AHA-C-3|IP_AHA-C-2|IP_AHA-C-1	4|0|0|0|0|0|0	4	7	0.16	0.87|0.00|0.00|0.00|0.00|0.00|0.00	0	0.1239	0.8675	0.7868
MTA	TTHERM_00049310	IP_AHA-S-2|IP_AHA-S-1|IP_AHA-CO-2|IP_AHA-CO-1|IP_AHA-C-3|IP_AHA-C-2|IP_AHA-C-1	0|0|0|0|3|0|0	3	7	0.1	0.00|0.00|0.00|0.00|0.87|0.00|0.00	0	0.1239	0.8675	0.7868
MRC1	TTHERM_00773330	IP_MRC1-S-3|IP_MRC1-S-2|IP_MRC1-S-1|IP_MRC1-CO-2|IP_MRC1-CO-1|IP_MRC1-C-1	0|12|5|0|19|2	38	6	0.06	0.00|0.00|0.00|0.00|0.39|0.00	10	0.0658	0.395	0.7871
MRC1	TTHERM_00979780	IP_MRC1-S-3|IP_MRC1-S-2|IP_MRC1-S-1|IP_MRC1-CO-2|IP_MRC1-CO-1|IP_MRC1-C-1	0|4|0|0|3|0	7	6	0.05	0.00|0.34|0.00|0.00|0.04|0.00	2	0.0633	0.34	0.7875
MRC1	TTHERM_00375010	IP_MRC1-S-3|IP_MRC1-S-2|IP_MRC1-S-1|IP_MRC1-CO-2|IP_MRC1-CO-1|IP_MRC1-C-1	4|4|2|2|1|3	16	6	0.05	0.34|0.02|0.00|0.00|0.00|0.00	3	0.0617	0.345	0.7879
MTA	TTHERM_01048090	IP_AHA-S-2|IP_AHA-S-1|IP_AHA-CO-2|IP_AHA-CO-1|IP_AHA-C-3|IP_AHA-C-2|IP_AHA-C-1	0|0|0|0|3|0|0	3	7	0.11	0.00|0.00|0.00|0.00|0.87|0.00|0.00	0	0.1236	0.865	0.7883
MTA	TTHERM_00105560	IP_AHA-S-2|IP_AHA-S-1|IP_AHA-CO-2|IP_AHA-CO-1|IP_AHA-C-3|IP_AHA-C-2|IP_AHA-C-1	0|0|3|0|0|0|0	3	7	0.15	0.00|0.00|0.87|0.00|0.00|0.00|0.00	0	0.1236	0.865	0.7883
MTA	TTHERM_00024050	IP_AHA-S-2|IP_AHA-S-1|IP_AHA-CO-2|IP_AHA-CO-1|IP_AHA-C-3|IP_AHA-C-2|IP_AHA-C-1	0|0|0|0|4|0|0	4	7	0.14	0.00|0.00|0.00|0.00|0.87|0.00|0.00	0	0.1236	0.865	0.7883
MTA	TTHERM_00446180	IP_AHA-S-2|IP_AHA-S-1|IP_AHA-CO-2|IP_AHA-CO-1|IP_AHA-C-3|IP_AHA-C-2|IP_AHA-C-1	0|0|0|0|3|0|0	3	7	0.13	0.00|0.00|0.00|0.00|0.87|0.00|0.00	0	0.1236	0.865	0.7883
MTA	TTHERM_00822160	IP_AHA-S-2|IP_AHA-S-1|IP_AHA-CO-2|IP_AHA-CO-1|IP_AHA-C-3|IP_AHA-C-2|IP_AHA-C-1	0|4|2|0|0|2|0	8	7	0.13	0.00|0.81|0.02|0.00|0.00|0.03|0.00	2	0.1236	0.81	0.7883
MRC1	TTHERM_00112550	IP_MRC1-S-3|IP_MRC1-S-2|IP_MRC1-S-1|IP_MRC1-CO-2|IP_MRC1-CO-1|IP_MRC1-C-1	0|0|0|7|2|14	23	6	0.07	0.00|0.00|0.00|0.00|0.00|0.33	9	0.0554	0.3325	0.7884
MRC1	TTHERM_00780850	IP_MRC1-S-3|IP_MRC1-S-2|IP_MRC1-S-1|IP_MRC1-CO-2|IP_MRC1-CO-1|IP_MRC1-C-1	0|1|0|3|1|6	11	6	0.03	0.00|0.00|0.00|0.00|0.00|0.27	4	0.0454	0.2725	0.7889
MTA	TTHERM_00716190	IP_AHA-S-2|IP_AHA-S-1|IP_AHA-CO-2|IP_AHA-CO-1|IP_AHA-C-3|IP_AHA-C-2|IP_AHA-C-1	0|0|3|0|0|0|0	3	7	0.13	0.00|0.00|0.86|0.00|0.00|0.00|0.00	0	0.1232	0.8625	0.7891
MTA	TTHERM_00842650	IP_AHA-S-2|IP_AHA-S-1|IP_AHA-CO-2|IP_AHA-CO-1|IP_AHA-C-3|IP_AHA-C-2|IP_AHA-C-1	0|0|0|0|0|3|0	3	7	0.11	0.00|0.00|0.00|0.00|0.00|0.86|0.00	0	0.1232	0.8625	0.7891
MTA	TTHERM_00497450	IP_AHA-S-2|IP_AHA-S-1|IP_AHA-CO-2|IP_AHA-CO-1|IP_AHA-C-3|IP_AHA-C-2|IP_AHA-C-1	0|0|3|0|0|0|0	3	7	0.13	0.00|0.00|0.86|0.00|0.00|0.00|0.00	0	0.1232	0.8625	0.7891
MRC1	TTHERM_00825190	IP_MRC1-S-3|IP_MRC1-S-2|IP_MRC1-S-1|IP_MRC1-CO-2|IP_MRC1-CO-1|IP_MRC1-C-1	0|1|0|3|0|2	6	6	0.03	0.00|0.00|0.00|0.17|0.00|0.01	2	0.0292	0.1675	0.7894
MTA	TTHERM_00312770	IP_AHA-S-2|IP_AHA-S-1|IP_AHA-CO-2|IP_AHA-CO-1|IP_AHA-C-3|IP_AHA-C-2|IP_AHA-C-1	0|0|3|0|0|0|0	3	7	0.13	0.00|0.00|0.86|0.00|0.00|0.00|0.00	0	0.1229	0.86	0.7904
MTA	TTHERM_01193550	IP_AHA-S-2|IP_AHA-S-1|IP_AHA-CO-2|IP_AHA-CO-1|IP_AHA-C-3|IP_AHA-C-2|IP_AHA-C-1	4|0|0|0|0|0|0	4	7	0.11	0.86|0.00|0.00|0.00|0.00|0.00|0.00	0	0.1229	0.86	0.7904
MTA	TTHERM_00013110	IP_AHA-S-2|IP_AHA-S-1|IP_AHA-CO-2|IP_AHA-CO-1|IP_AHA-C-3|IP_AHA-C-2|IP_AHA-C-1	0|0|0|0|2|0|0	2	7	0.11	0.00|0.00|0.00|0.00|0.86|0.00|0.00	0	0.1229	0.86	0.7904
MTA	TTHERM_00353480	IP_AHA-S-2|IP_AHA-S-1|IP_AHA-CO-2|IP_AHA-CO-1|IP_AHA-C-3|IP_AHA-C-2|IP_AHA-C-1	0|5|1|0|11|0|0	17	7	0.12	0.00|0.00|0.00|0.00|0.86|0.00|0.00	6	0.1229	0.86	0.7904
MTA	TTHERM_00392760	IP_AHA-S-2|IP_AHA-S-1|IP_AHA-CO-2|IP_AHA-CO-1|IP_AHA-C-3|IP_AHA-C-2|IP_AHA-C-1	0|0|0|0|3|0|0	3	7	0.11	0.00|0.00|0.00|0.00|0.86|0.00|0.00	0	0.1229	0.86	0.7904
MRC1	TTHERM_00220670	IP_MRC1-S-3|IP_MRC1-S-2|IP_MRC1-S-1|IP_MRC1-CO-2|IP_MRC1-CO-1|IP_MRC1-C-1	0|0|0|0|0|3	3	6	0.03	0.00|0.00|0.00|0.00|0.00|0.17	2	0.0279	0.1675	0.7904
MRC1	TTHERM_00442180	IP_MRC1-S-3|IP_MRC1-S-2|IP_MRC1-S-1|IP_MRC1-CO-2|IP_MRC1-CO-1|IP_MRC1-C-1	0|8|1|1|13|8	31	6	0.03	0.00|0.00|0.00|0.00|0.17|0.00	8	0.0279	0.1675	0.7904
MRC1	TTHERM_00476640	IP_MRC1-S-3|IP_MRC1-S-2|IP_MRC1-S-1|IP_MRC1-CO-2|IP_MRC1-CO-1|IP_MRC1-C-1	0|5|3|2|8|2	20	6	0.03	0.00|0.00|0.00|0.00|0.16|0.00	5	0.0258	0.155	0.791
MTA	TTHERM_00037340	IP_AHA-S-2|IP_AHA-S-1|IP_AHA-CO-2|IP_AHA-CO-1|IP_AHA-C-3|IP_AHA-C-2|IP_AHA-C-1	0|0|0|0|2|0|0	2	7	0.1	0.00|0.00|0.00|0.00|0.86|0.00|0.00	0	0.1225	0.8575	0.7912
MTA	TTHERM_00502250	IP_AHA-S-2|IP_AHA-S-1|IP_AHA-CO-2|IP_AHA-CO-1|IP_AHA-C-3|IP_AHA-C-2|IP_AHA-C-1	0|0|4|0|0|0|0	4	7	0.11	0.00|0.00|0.86|0.00|0.00|0.00|0.00	0	0.1225	0.8575	0.7912
MTA	TTHERM_00698640	IP_AHA-S-2|IP_AHA-S-1|IP_AHA-CO-2|IP_AHA-CO-1|IP_AHA-C-3|IP_AHA-C-2|IP_AHA-C-1	0|0|3|0|0|0|0	3	7	0.11	0.00|0.00|0.86|0.00|0.00|0.00|0.00	0	0.1225	0.8575	0.7912
MTA	TTHERM_00486790	IP_AHA-S-2|IP_AHA-S-1|IP_AHA-CO-2|IP_AHA-CO-1|IP_AHA-C-3|IP_AHA-C-2|IP_AHA-C-1	0|3|2|0|4|1|0	10	7	0.16	0.00|0.24|0.00|0.00|0.60|0.00|0.00	2	0.1221	0.6025	0.7915
MRC1	TTHERM_00549480	IP_MRC1-S-3|IP_MRC1-S-2|IP_MRC1-S-1|IP_MRC1-CO-2|IP_MRC1-CO-1|IP_MRC1-C-1	0|0|0|0|0|3	3	6	0.02	0.00|0.00|0.00|0.00|0.00|0.11	2	0.0179	0.1075	0.7915
MTA	TTHERM_00149230	IP_AHA-S-2|IP_AHA-S-1|IP_AHA-CO-2|IP_AHA-CO-1|IP_AHA-C-3|IP_AHA-C-2|IP_AHA-C-1	0|0|0|0|3|0|0	3	7	0.15	0.00|0.00|0.00|0.00|0.85|0.00|0.00	0	0.1221	0.855	0.7918
MTA	TTHERM_01244570	IP_AHA-S-2|IP_AHA-S-1|IP_AHA-CO-2|IP_AHA-CO-1|IP_AHA-C-3|IP_AHA-C-2|IP_AHA-C-1	0|0|0|0|0|3|0	3	7	0.16	0.00|0.00|0.00|0.00|0.00|0.85|0.00	0	0.1218	0.8525	0.792
MRC1	TTHERM_00473020	IP_MRC1-S-3|IP_MRC1-S-2|IP_MRC1-S-1|IP_MRC1-CO-2|IP_MRC1-CO-1|IP_MRC1-C-1	0|1|3|0|1|0	5	6	0.01	0.00|0.00|0.09|0.00|0.00|0.00	2	0.0158	0.0925	0.7921
MRC1	TTHERM_01289110	IP_MRC1-S-3|IP_MRC1-S-2|IP_MRC1-S-1|IP_MRC1-CO-2|IP_MRC1-CO-1|IP_MRC1-C-1	0|10|11|1|15|1	38	6	0.01	0.00|0.00|0.00|0.00|0.09|0.00	9	0.0146	0.0875	0.7926
MTA	TTHERM_00688350	IP_AHA-S-2|IP_AHA-S-1|IP_AHA-CO-2|IP_AHA-CO-1|IP_AHA-C-3|IP_AHA-C-2|IP_AHA-C-1	0|0|0|0|3|0|0	3	7	0.11	0.00|0.00|0.00|0.00|0.85|0.00|0.00	0	0.1214	0.85	0.7928
MTA	TTHERM_01263960	IP_AHA-S-2|IP_AHA-S-1|IP_AHA-CO-2|IP_AHA-CO-1|IP_AHA-C-3|IP_AHA-C-2|IP_AHA-C-1	0|2|0|0|0|0|0	2	7	0.13	0.00|0.85|0.00|0.00|0.00|0.00|0.00	0	0.1214	0.85	0.7928
MTA	TTHERM_00112770	IP_AHA-S-2|IP_AHA-S-1|IP_AHA-CO-2|IP_AHA-CO-1|IP_AHA-C-3|IP_AHA-C-2|IP_AHA-C-1	0|0|4|0|0|0|0	4	7	0.12	0.00|0.00|0.85|0.00|0.00|0.00|0.00	0	0.1214	0.85	0.7928
MRC1	TTHERM_00400750	IP_MRC1-S-3|IP_MRC1-S-2|IP_MRC1-S-1|IP_MRC1-CO-2|IP_MRC1-CO-1|IP_MRC1-C-1	1|9|0|2|14|10	36	6	0.01	0.00|0.00|0.00|0.00|0.08|0.01	9	0.0142	0.0775	0.7932
MRC1	TTHERM_00220750	IP_MRC1-S-3|IP_MRC1-S-2|IP_MRC1-S-1|IP_MRC1-CO-2|IP_MRC1-CO-1|IP_MRC1-C-1	0|3|0|1|2|0	6	6	0.01	0.00|0.08|0.00|0.00|0.00|0.00	2	0.0137	0.0775	0.7937
MTA	TTHERM_00557840	IP_AHA-S-2|IP_AHA-S-1|IP_AHA-CO-2|IP_AHA-CO-1|IP_AHA-C-3|IP_AHA-C-2|IP_AHA-C-1	0|0|3|0|0|0|0	3	7	0.09	0.00|0.00|0.85|0.00|0.00|0.00|0.00	0	0.1211	0.8475	0.7938
MTA	TTHERM_01006600	IP_AHA-S-2|IP_AHA-S-1|IP_AHA-CO-2|IP_AHA-CO-1|IP_AHA-C-3|IP_AHA-C-2|IP_AHA-C-1	0|3|0|0|0|0|0	3	7	0.12	0.00|0.85|0.00|0.00|0.00|0.00|0.00	0	0.1211	0.8475	0.7938
MTA	TTHERM_00591660	IP_AHA-S-2|IP_AHA-S-1|IP_AHA-CO-2|IP_AHA-CO-1|IP_AHA-C-3|IP_AHA-C-2|IP_AHA-C-1	0|0|0|0|3|0|0	3	7	0.12	0.00|0.00|0.00|0.00|0.85|0.00|0.00	0	0.1211	0.8475	0.7938
MTA	TTHERM_00193750	IP_AHA-S-2|IP_AHA-S-1|IP_AHA-CO-2|IP_AHA-CO-1|IP_AHA-C-3|IP_AHA-C-2|IP_AHA-C-1	0|0|3|0|0|0|0	3	7	0.14	0.00|0.00|0.85|0.00|0.00|0.00|0.00	0	0.1211	0.8475	0.7938
MRC1	TTHERM_00363210	IP_MRC1-S-3|IP_MRC1-S-2|IP_MRC1-S-1|IP_MRC1-CO-2|IP_MRC1-CO-1|IP_MRC1-C-1	0|22|14|0|8|0	44	6	0	0.00|0.08|0.00|0.00|0.00|0.00	15	0.0129	0.0775	0.7942
MRC1	TTHERM_00455630	IP_MRC1-S-3|IP_MRC1-S-2|IP_MRC1-S-1|IP_MRC1-CO-2|IP_MRC1-CO-1|IP_MRC1-C-1	0|3|1|0|0|0	4	6	0.04	0.00|0.07|0.00|0.00|0.00|0.00	2	0.0125	0.075	0.7948
MTA	TTHERM_00471840	IP_AHA-S-2|IP_AHA-S-1|IP_AHA-CO-2|IP_AHA-CO-1|IP_AHA-C-3|IP_AHA-C-2|IP_AHA-C-1	0|0|3|0|0|0|0	3	7	0.14	0.00|0.00|0.84|0.00|0.00|0.00|0.00	0	0.1207	0.845	0.7951
MTA	TTHERM_00428610	IP_AHA-S-2|IP_AHA-S-1|IP_AHA-CO-2|IP_AHA-CO-1|IP_AHA-C-3|IP_AHA-C-2|IP_AHA-C-1	0|0|3|0|0|0|0	3	7	0.14	0.00|0.00|0.84|0.00|0.00|0.00|0.00	0	0.1207	0.845	0.7951
MTA	TTHERM_00557890	IP_AHA-S-2|IP_AHA-S-1|IP_AHA-CO-2|IP_AHA-CO-1|IP_AHA-C-3|IP_AHA-C-2|IP_AHA-C-1	0|2|0|0|0|0|0	2	7	0.14	0.00|0.84|0.00|0.00|0.00|0.00|0.00	0	0.1207	0.845	0.7951
MTA	TTHERM_00248340	IP_AHA-S-2|IP_AHA-S-1|IP_AHA-CO-2|IP_AHA-CO-1|IP_AHA-C-3|IP_AHA-C-2|IP_AHA-C-1	0|2|0|0|0|0|0	2	7	0.11	0.00|0.84|0.00|0.00|0.00|0.00|0.00	0	0.1207	0.845	0.7951
MTA	TTHERM_00193849	IP_AHA-S-2|IP_AHA-S-1|IP_AHA-CO-2|IP_AHA-CO-1|IP_AHA-C-3|IP_AHA-C-2|IP_AHA-C-1	0|0|3|0|0|0|0	3	7	0.12	0.00|0.00|0.84|0.00|0.00|0.00|0.00	0	0.1207	0.845	0.7951
MRC1	TTHERM_00624780	IP_MRC1-S-3|IP_MRC1-S-2|IP_MRC1-S-1|IP_MRC1-CO-2|IP_MRC1-CO-1|IP_MRC1-C-1	0|0|0|1|0|4	5	6	0.01	0.00|0.00|0.00|0.00|0.00|0.07	3	0.0121	0.0725	0.7953
MTA	TTHERM_00571590	IP_AHA-S-2|IP_AHA-S-1|IP_AHA-CO-2|IP_AHA-CO-1|IP_AHA-C-3|IP_AHA-C-2|IP_AHA-C-1	0|0|0|0|0|3|0	3	7	0.11	0.00|0.00|0.00|0.00|0.00|0.84|0.00	0	0.1204	0.8425	0.7958
MTA	TTHERM_00334280	IP_AHA-S-2|IP_AHA-S-1|IP_AHA-CO-2|IP_AHA-CO-1|IP_AHA-C-3|IP_AHA-C-2|IP_AHA-C-1	0|0|3|0|0|0|0	3	7	0.12	0.00|0.00|0.84|0.00|0.00|0.00|0.00	0	0.1204	0.8425	0.7958
MTA	TTHERM_00497500	IP_AHA-S-2|IP_AHA-S-1|IP_AHA-CO-2|IP_AHA-CO-1|IP_AHA-C-3|IP_AHA-C-2|IP_AHA-C-1	0|0|0|0|0|2|0	2	7	0.09	0.00|0.00|0.00|0.00|0.00|0.84|0.00	0	0.1204	0.8425	0.7958
MRC1	TTHERM_00402070	IP_MRC1-S-3|IP_MRC1-S-2|IP_MRC1-S-1|IP_MRC1-CO-2|IP_MRC1-CO-1|IP_MRC1-C-1	0|3|1|0|2|0	6	6	0.01	0.00|0.06|0.00|0.00|0.00|0.00	2	0.0117	0.065	0.7959
MTA	TTHERM_00354700	IP_AHA-S-2|IP_AHA-S-1|IP_AHA-CO-2|IP_AHA-CO-1|IP_AHA-C-3|IP_AHA-C-2|IP_AHA-C-1	0|0|0|0|3|0|0	3	7	0.14	0.00|0.00|0.00|0.00|0.84|0.00|0.00	0	0.12	0.84	0.7965
MTA	TTHERM_00825280	IP_AHA-S-2|IP_AHA-S-1|IP_AHA-CO-2|IP_AHA-CO-1|IP_AHA-C-3|IP_AHA-C-2|IP_AHA-C-1	0|0|0|0|2|0|0	2	7	0.1	0.00|0.00|0.00|0.00|0.84|0.00|0.00	0	0.12	0.84	0.7965
MTA	TTHERM_00947450	IP_AHA-S-2|IP_AHA-S-1|IP_AHA-CO-2|IP_AHA-CO-1|IP_AHA-C-3|IP_AHA-C-2|IP_AHA-C-1	2|0|0|0|0|0|0	2	7	0.11	0.84|0.00|0.00|0.00|0.00|0.00|0.00	0	0.12	0.84	0.7965
MRC1	TTHERM_01513260	IP_MRC1-S-3|IP_MRC1-S-2|IP_MRC1-S-1|IP_MRC1-CO-2|IP_MRC1-CO-1|IP_MRC1-C-1	0|7|14|0|3|0	24	6	0.02	0.00|0.00|0.06|0.00|0.00|0.00	10	0.01	0.06	0.7969
MRC1	TTHERM_000688599	IP_MRC1-S-3|IP_MRC1-S-2|IP_MRC1-S-1|IP_MRC1-CO-2|IP_MRC1-CO-1|IP_MRC1-C-1	0|3|0|0|2|0	5	6	0.02	0.00|0.05|0.00|0.00|0.01|0.00	2	0.01	0.0475	0.7969
MRC1	TTHERM_00421000	IP_MRC1-S-3|IP_MRC1-S-2|IP_MRC1-S-1|IP_MRC1-CO-2|IP_MRC1-CO-1|IP_MRC1-C-1	0|2|0|1|3|0	6	6	0.01	0.00|0.01|0.00|0.00|0.04|0.00	2	0.0092	0.045	0.7975
MTA	TTHERM_00551090	IP_AHA-S-2|IP_AHA-S-1|IP_AHA-CO-2|IP_AHA-CO-1|IP_AHA-C-3|IP_AHA-C-2|IP_AHA-C-1	0|0|0|0|2|0|0	2	7	0.16	0.00|0.00|0.00|0.00|0.84|0.00|0.00	0	0.1196	0.8375	0.7977
MTA	TTHERM_01104910	IP_AHA-S-2|IP_AHA-S-1|IP_AHA-CO-2|IP_AHA-CO-1|IP_AHA-C-3|IP_AHA-C-2|IP_AHA-C-1	0|2|0|0|0|0|0	2	7	0.11	0.00|0.84|0.00|0.00|0.00|0.00|0.00	0	0.1196	0.8375	0.7977
MTA	TTHERM_00013620	IP_AHA-S-2|IP_AHA-S-1|IP_AHA-CO-2|IP_AHA-CO-1|IP_AHA-C-3|IP_AHA-C-2|IP_AHA-C-1	0|2|0|0|0|0|0	2	7	0.13	0.00|0.84|0.00|0.00|0.00|0.00|0.00	0	0.1196	0.8375	0.7977
MTA	TTHERM_00691150	IP_AHA-S-2|IP_AHA-S-1|IP_AHA-CO-2|IP_AHA-CO-1|IP_AHA-C-3|IP_AHA-C-2|IP_AHA-C-1	0|0|0|0|3|0|0	3	7	0.11	0.00|0.00|0.00|0.00|0.84|0.00|0.00	0	0.1196	0.8375	0.7977
MTA	TTHERM_01615780	IP_AHA-S-2|IP_AHA-S-1|IP_AHA-CO-2|IP_AHA-CO-1|IP_AHA-C-3|IP_AHA-C-2|IP_AHA-C-1	0|0|0|0|3|0|0	3	7	0.13	0.00|0.00|0.00|0.00|0.84|0.00|0.00	0	0.1196	0.8375	0.7977
MRC1	TTHERM_00691520	IP_MRC1-S-3|IP_MRC1-S-2|IP_MRC1-S-1|IP_MRC1-CO-2|IP_MRC1-CO-1|IP_MRC1-C-1	0|0|0|8|0|9	17	6	0.01	0.00|0.00|0.00|0.00|0.00|0.05	7	0.0083	0.0475	0.7985
MRC1	TTHERM_01265040	IP_MRC1-S-3|IP_MRC1-S-2|IP_MRC1-S-1|IP_MRC1-CO-2|IP_MRC1-CO-1|IP_MRC1-C-1	0|2|0|0|3|0	5	6	0.01	0.00|0.01|0.00|0.00|0.04|0.00	2	0.0083	0.04	0.7985
MTA	TTHERM_00285560	IP_AHA-S-2|IP_AHA-S-1|IP_AHA-CO-2|IP_AHA-CO-1|IP_AHA-C-3|IP_AHA-C-2|IP_AHA-C-1	0|0|4|0|0|0|0	4	7	0.1	0.00|0.00|0.83|0.00|0.00|0.00|0.00	0	0.1193	0.835	0.7989
MTA	TTHERM_00106980	IP_AHA-S-2|IP_AHA-S-1|IP_AHA-CO-2|IP_AHA-CO-1|IP_AHA-C-3|IP_AHA-C-2|IP_AHA-C-1	2|0|0|0|0|0|0	2	7	0.13	0.83|0.00|0.00|0.00|0.00|0.00|0.00	0	0.1193	0.835	0.7989
MTA	TTHERM_00881480	IP_AHA-S-2|IP_AHA-S-1|IP_AHA-CO-2|IP_AHA-CO-1|IP_AHA-C-3|IP_AHA-C-2|IP_AHA-C-1	0|2|0|0|0|0|0	2	7	0.1	0.00|0.83|0.00|0.00|0.00|0.00|0.00	0	0.1193	0.835	0.7989
MTA	TTHERM_00105580	IP_AHA-S-2|IP_AHA-S-1|IP_AHA-CO-2|IP_AHA-CO-1|IP_AHA-C-3|IP_AHA-C-2|IP_AHA-C-1	0|0|3|0|0|0|0	3	7	0.14	0.00|0.00|0.83|0.00|0.00|0.00|0.00	0	0.1193	0.835	0.7989
MTA	TTHERM_00058590	IP_AHA-S-2|IP_AHA-S-1|IP_AHA-CO-2|IP_AHA-CO-1|IP_AHA-C-3|IP_AHA-C-2|IP_AHA-C-1	0|0|0|0|0|2|0	2	7	0.12	0.00|0.00|0.00|0.00|0.00|0.83|0.00	0	0.1193	0.835	0.7989
MRC1	TTHERM_00526450	IP_MRC1-S-3|IP_MRC1-S-2|IP_MRC1-S-1|IP_MRC1-CO-2|IP_MRC1-CO-1|IP_MRC1-C-1	0|8|3|1|9|1	22	6	0.01	0.00|0.00|0.00|0.00|0.04|0.00	6	0.0079	0.045	0.7991
MTA	TTHERM_00804710	IP_AHA-S-2|IP_AHA-S-1|IP_AHA-CO-2|IP_AHA-CO-1|IP_AHA-C-3|IP_AHA-C-2|IP_AHA-C-1	0|0|0|0|2|0|0	2	7	0.11	0.00|0.00|0.00|0.00|0.83|0.00|0.00	0	0.1186	0.83	0.7993
MTA	TTHERM_00095540	IP_AHA-S-2|IP_AHA-S-1|IP_AHA-CO-2|IP_AHA-CO-1|IP_AHA-C-3|IP_AHA-C-2|IP_AHA-C-1	0|0|3|0|0|0|0	3	7	0.09	0.00|0.00|0.83|0.00|0.00|0.00|0.00	0	0.1186	0.83	0.7993
MRC1	TTHERM_00577080	IP_MRC1-S-3|IP_MRC1-S-2|IP_MRC1-S-1|IP_MRC1-CO-2|IP_MRC1-CO-1|IP_MRC1-C-1	0|0|0|0|0|4	4	6	0	0.00|0.00|0.00|0.00|0.00|0.04	3	0.0075	0.045	0.7996
MRC1	TTHERM_00577030	IP_MRC1-S-3|IP_MRC1-S-2|IP_MRC1-S-1|IP_MRC1-CO-2|IP_MRC1-CO-1|IP_MRC1-C-1	0|0|0|2|1|2	5	6	0.01	0.00|0.00|0.00|0.03|0.00|0.01	2	0.0071	0.03	0.8001
MTA	TTHERM_00047230	IP_AHA-S-2|IP_AHA-S-1|IP_AHA-CO-2|IP_AHA-CO-1|IP_AHA-C-3|IP_AHA-C-2|IP_AHA-C-1	0|0|0|0|0|2|0	2	7	0.1	0.00|0.00|0.00|0.00|0.00|0.83|0.00	0	0.1182	0.8275	0.8003
MTA	TTHERM_000245499	IP_AHA-S-2|IP_AHA-S-1|IP_AHA-CO-2|IP_AHA-CO-1|IP_AHA-C-3|IP_AHA-C-2|IP_AHA-C-1	0|0|0|0|2|0|0	2	7	0.12	0.00|0.00|0.00|0.00|0.83|0.00|0.00	0	0.1182	0.8275	0.8003
MTA	TTHERM_02199750	IP_AHA-S-2|IP_AHA-S-1|IP_AHA-CO-2|IP_AHA-CO-1|IP_AHA-C-3|IP_AHA-C-2|IP_AHA-C-1	3|0|0|0|0|0|0	3	7	0.13	0.83|0.00|0.00|0.00|0.00|0.00|0.00	0	0.1182	0.8275	0.8003
MTA	TTHERM_01005320	IP_AHA-S-2|IP_AHA-S-1|IP_AHA-CO-2|IP_AHA-CO-1|IP_AHA-C-3|IP_AHA-C-2|IP_AHA-C-1	0|0|3|0|0|0|0	3	7	0.12	0.00|0.00|0.83|0.00|0.00|0.00|0.00	0	0.1182	0.8275	0.8003
MTA	TTHERM_01245640	IP_AHA-S-2|IP_AHA-S-1|IP_AHA-CO-2|IP_AHA-CO-1|IP_AHA-C-3|IP_AHA-C-2|IP_AHA-C-1	0|0|0|0|2|0|0	2	7	0.11	0.00|0.00|0.00|0.00|0.82|0.00|0.00	0	0.1179	0.825	0.8005
MRC1	TTHERM_00903870	IP_MRC1-S-3|IP_MRC1-S-2|IP_MRC1-S-1|IP_MRC1-CO-2|IP_MRC1-CO-1|IP_MRC1-C-1	0|3|0|0|2|0	5	6	0	0.00|0.04|0.00|0.00|0.00|0.00	2	0.0067	0.0375	0.8012
MRC1	TTHERM_01207660	IP_MRC1-S-3|IP_MRC1-S-2|IP_MRC1-S-1|IP_MRC1-CO-2|IP_MRC1-CO-1|IP_MRC1-C-1	0|0|0|2|2|1	5	6	0.01	0.00|0.00|0.00|0.03|0.01|0.00	2	0.0067	0.0275	0.8012
MTA	TTHERM_00509070	IP_AHA-S-2|IP_AHA-S-1|IP_AHA-CO-2|IP_AHA-CO-1|IP_AHA-C-3|IP_AHA-C-2|IP_AHA-C-1	0|2|0|0|0|0|0	2	7	0.15	0.00|0.82|0.00|0.00|0.00|0.00|0.00	0	0.1175	0.8225	0.8014
MTA	TTHERM_00766530	IP_AHA-S-2|IP_AHA-S-1|IP_AHA-CO-2|IP_AHA-CO-1|IP_AHA-C-3|IP_AHA-C-2|IP_AHA-C-1	0|2|0|0|0|0|0	2	7	0.13	0.00|0.82|0.00|0.00|0.00|0.00|0.00	0	0.1175	0.8225	0.8014
MTA	TTHERM_00564120	IP_AHA-S-2|IP_AHA-S-1|IP_AHA-CO-2|IP_AHA-CO-1|IP_AHA-C-3|IP_AHA-C-2|IP_AHA-C-1	0|2|0|0|0|0|0	2	7	0.1	0.00|0.82|0.00|0.00|0.00|0.00|0.00	0	0.1175	0.8225	0.8014
MTA	TTHERM_000148715	IP_AHA-S-2|IP_AHA-S-1|IP_AHA-CO-2|IP_AHA-CO-1|IP_AHA-C-3|IP_AHA-C-2|IP_AHA-C-1	0|0|0|0|2|0|0	2	7	0.14	0.00|0.00|0.00|0.00|0.82|0.00|0.00	0	0.1175	0.8225	0.8014
MRC1	TTHERM_00550700	IP_MRC1-S-3|IP_MRC1-S-2|IP_MRC1-S-1|IP_MRC1-CO-2|IP_MRC1-CO-1|IP_MRC1-C-1	0|0|0|5|0|2	7	6	0	0.00|0.00|0.00|0.04|0.00|0.00	4	0.0058	0.035	0.8017
MTA	TTHERM_00429910	IP_AHA-S-2|IP_AHA-S-1|IP_AHA-CO-2|IP_AHA-CO-1|IP_AHA-C-3|IP_AHA-C-2|IP_AHA-C-1	0|0|0|0|0|2|0	2	7	0.1	0.00|0.00|0.00|0.00|0.00|0.82|0.00	0	0.1171	0.82	0.802
MTA	TTHERM_00554270	IP_AHA-S-2|IP_AHA-S-1|IP_AHA-CO-2|IP_AHA-CO-1|IP_AHA-C-3|IP_AHA-C-2|IP_AHA-C-1	0|0|0|0|2|0|0	2	7	0.1	0.00|0.00|0.00|0.00|0.82|0.00|0.00	0	0.1171	0.82	0.802
MTA	TTHERM_00683070	IP_AHA-S-2|IP_AHA-S-1|IP_AHA-CO-2|IP_AHA-CO-1|IP_AHA-C-3|IP_AHA-C-2|IP_AHA-C-1	0|0|0|0|2|0|0	2	7	0.1	0.00|0.00|0.00|0.00|0.82|0.00|0.00	0	0.1171	0.82	0.802
MTA	TTHERM_01299660	IP_AHA-S-2|IP_AHA-S-1|IP_AHA-CO-2|IP_AHA-CO-1|IP_AHA-C-3|IP_AHA-C-2|IP_AHA-C-1	5|0|5|0|0|3|0	13	7	0.11	0.68|0.00|0.13|0.00|0.00|0.00|0.00	3	0.1168	0.6825	0.8022
MRC1	TTHERM_00715760	IP_MRC1-S-3|IP_MRC1-S-2|IP_MRC1-S-1|IP_MRC1-CO-2|IP_MRC1-CO-1|IP_MRC1-C-1	0|0|0|2|0|0	2	6	0	0.00|0.00|0.00|0.03|0.00|0.00	2	0.0054	0.0325	0.8027
MRC1	TTHERM_00721150	IP_MRC1-S-3|IP_MRC1-S-2|IP_MRC1-S-1|IP_MRC1-CO-2|IP_MRC1-CO-1|IP_MRC1-C-1	0|29|16|2|46|6	99	6	0.01	0.00|0.00|0.00|0.00|0.03|0.00	28	0.0054	0.0325	0.8027
MTA	TTHERM_00535550	IP_AHA-S-2|IP_AHA-S-1|IP_AHA-CO-2|IP_AHA-CO-1|IP_AHA-C-3|IP_AHA-C-2|IP_AHA-C-1	0|0|3|0|0|0|0	3	7	0.11	0.00|0.00|0.81|0.00|0.00|0.00|0.00	0	0.1164	0.815	0.8029
MTA	TTHERM_01125270	IP_AHA-S-2|IP_AHA-S-1|IP_AHA-CO-2|IP_AHA-CO-1|IP_AHA-C-3|IP_AHA-C-2|IP_AHA-C-1	0|2|0|0|0|0|0	2	7	0.12	0.00|0.81|0.00|0.00|0.00|0.00|0.00	0	0.1164	0.815	0.8029
MTA	TTHERM_00289380	IP_AHA-S-2|IP_AHA-S-1|IP_AHA-CO-2|IP_AHA-CO-1|IP_AHA-C-3|IP_AHA-C-2|IP_AHA-C-1	0|0|0|0|0|2|0	2	7	0.1	0.00|0.00|0.00|0.00|0.00|0.81|0.00	0	0.1164	0.815	0.8029
MTA	TTHERM_00704010	IP_AHA-S-2|IP_AHA-S-1|IP_AHA-CO-2|IP_AHA-CO-1|IP_AHA-C-3|IP_AHA-C-2|IP_AHA-C-1	0|0|4|0|0|0|0	4	7	0.1	0.00|0.00|0.81|0.00|0.00|0.00|0.00	0	0.1161	0.8125	0.8031
MRC1	TTHERM_000499375	IP_MRC1-S-3|IP_MRC1-S-2|IP_MRC1-S-1|IP_MRC1-CO-2|IP_MRC1-CO-1|IP_MRC1-C-1	0|3|0|0|4|0	7	6	0	0.00|0.00|0.00|0.00|0.02|0.00	3	0.0046	0.025	0.8032
MTA	TTHERM_00448570	IP_AHA-S-2|IP_AHA-S-1|IP_AHA-CO-2|IP_AHA-CO-1|IP_AHA-C-3|IP_AHA-C-2|IP_AHA-C-1	0|0|0|0|2|0|0	2	7	0.12	0.00|0.00|0.00|0.00|0.81|0.00|0.00	0	0.1157	0.81	0.8033
MTA	TTHERM_00283330	IP_AHA-S-2|IP_AHA-S-1|IP_AHA-CO-2|IP_AHA-CO-1|IP_AHA-C-3|IP_AHA-C-2|IP_AHA-C-1	0|0|0|0|2|0|0	2	7	0.1	0.00|0.00|0.00|0.00|0.81|0.00|0.00	0	0.1154	0.8075	0.8046
MTA	TTHERM_00421140	IP_AHA-S-2|IP_AHA-S-1|IP_AHA-CO-2|IP_AHA-CO-1|IP_AHA-C-3|IP_AHA-C-2|IP_AHA-C-1	0|2|0|0|0|0|0	2	7	0.1	0.00|0.81|0.00|0.00|0.00|0.00|0.00	0	0.1154	0.8075	0.8046
MTA	TTHERM_00578890	IP_AHA-S-2|IP_AHA-S-1|IP_AHA-CO-2|IP_AHA-CO-1|IP_AHA-C-3|IP_AHA-C-2|IP_AHA-C-1	0|0|0|0|2|0|0	2	7	0.1	0.00|0.00|0.00|0.00|0.81|0.00|0.00	0	0.1154	0.8075	0.8046
MTA	TTHERM_00804750	IP_AHA-S-2|IP_AHA-S-1|IP_AHA-CO-2|IP_AHA-CO-1|IP_AHA-C-3|IP_AHA-C-2|IP_AHA-C-1	0|2|0|0|0|0|0	2	7	0.13	0.00|0.81|0.00|0.00|0.00|0.00|0.00	0	0.1154	0.8075	0.8046
MTA	TTHERM_00247170	IP_AHA-S-2|IP_AHA-S-1|IP_AHA-CO-2|IP_AHA-CO-1|IP_AHA-C-3|IP_AHA-C-2|IP_AHA-C-1	0|0|0|0|2|0|0	2	7	0.14	0.00|0.00|0.00|0.00|0.81|0.00|0.00	0	0.1154	0.8075	0.8046
MTA	TTHERM_00522420	IP_AHA-S-2|IP_AHA-S-1|IP_AHA-CO-2|IP_AHA-CO-1|IP_AHA-C-3|IP_AHA-C-2|IP_AHA-C-1	0|0|0|0|2|0|0	2	7	0.13	0.00|0.00|0.00|0.00|0.81|0.00|0.00	0	0.1154	0.8075	0.8046
MRC1	TTHERM_00105430	IP_MRC1-S-3|IP_MRC1-S-2|IP_MRC1-S-1|IP_MRC1-CO-2|IP_MRC1-CO-1|IP_MRC1-C-1	0|5|0|1|13|0	19	6	0	0.00|0.00|0.00|0.00|0.02|0.00	9	0.0042	0.025	0.8048
MRC1	TTHERM_00195860	IP_MRC1-S-3|IP_MRC1-S-2|IP_MRC1-S-1|IP_MRC1-CO-2|IP_MRC1-CO-1|IP_MRC1-C-1	0|2|1|0|1|2	6	6	0	0.00|0.00|0.00|0.00|0.00|0.02	2	0.0042	0.0175	0.8048
MRC1	TTHERM_00146220	IP_MRC1-S-3|IP_MRC1-S-2|IP_MRC1-S-1|IP_MRC1-CO-2|IP_MRC1-CO-1|IP_MRC1-C-1	0|0|0|3|0|3	6	6	0	0.00|0.00|0.00|0.02|0.00|0.01	3	0.0042	0.0175	0.8048
MTA	TTHERM_01205390	IP_AHA-S-2|IP_AHA-S-1|IP_AHA-CO-2|IP_AHA-CO-1|IP_AHA-C-3|IP_AHA-C-2|IP_AHA-C-1	0|0|0|0|2|0|0	2	7	0.12	0.00|0.00|0.00|0.00|0.81|0.00|0.00	0	0.115	0.805	0.805
MTA	TTHERM_00569290	IP_AHA-S-2|IP_AHA-S-1|IP_AHA-CO-2|IP_AHA-CO-1|IP_AHA-C-3|IP_AHA-C-2|IP_AHA-C-1	0|0|0|0|2|0|0	2	7	0.13	0.00|0.00|0.00|0.00|0.81|0.00|0.00	0	0.115	0.805	0.805
MTA	TTHERM_000800260	IP_AHA-S-2|IP_AHA-S-1|IP_AHA-CO-2|IP_AHA-CO-1|IP_AHA-C-3|IP_AHA-C-2|IP_AHA-C-1	0|0|0|0|2|0|0	2	7	0.12	0.00|0.00|0.00|0.00|0.80|0.00|0.00	0	0.1146	0.8025	0.8056
MTA	TTHERM_00498150	IP_AHA-S-2|IP_AHA-S-1|IP_AHA-CO-2|IP_AHA-CO-1|IP_AHA-C-3|IP_AHA-C-2|IP_AHA-C-1	0|2|0|0|0|0|0	2	7	0.12	0.00|0.80|0.00|0.00|0.00|0.00|0.00	0	0.1146	0.8025	0.8056
MTA	TTHERM_00145270	IP_AHA-S-2|IP_AHA-S-1|IP_AHA-CO-2|IP_AHA-CO-1|IP_AHA-C-3|IP_AHA-C-2|IP_AHA-C-1	0|0|0|0|2|0|0	2	7	0.13	0.00|0.00|0.00|0.00|0.80|0.00|0.00	0	0.1146	0.8025	0.8056
MTA	TTHERM_00194270	IP_AHA-S-2|IP_AHA-S-1|IP_AHA-CO-2|IP_AHA-CO-1|IP_AHA-C-3|IP_AHA-C-2|IP_AHA-C-1	0|2|0|0|0|0|0	2	7	0.12	0.00|0.79|0.00|0.00|0.00|0.00|0.00	0	0.1136	0.795	0.8062
MTA	TTHERM_00219250	IP_AHA-S-2|IP_AHA-S-1|IP_AHA-CO-2|IP_AHA-CO-1|IP_AHA-C-3|IP_AHA-C-2|IP_AHA-C-1	0|0|2|0|0|0|0	2	7	0.11	0.00|0.00|0.79|0.00|0.00|0.00|0.00	0	0.1136	0.795	0.8062
MTA	TTHERM_00463820	IP_AHA-S-2|IP_AHA-S-1|IP_AHA-CO-2|IP_AHA-CO-1|IP_AHA-C-3|IP_AHA-C-2|IP_AHA-C-1	0|2|0|0|0|0|0	2	7	0.11	0.00|0.79|0.00|0.00|0.00|0.00|0.00	0	0.1136	0.795	0.8062
MTA	TTHERM_00193410	IP_AHA-S-2|IP_AHA-S-1|IP_AHA-CO-2|IP_AHA-CO-1|IP_AHA-C-3|IP_AHA-C-2|IP_AHA-C-1	1|5|9|0|0|9|0	24	7	0.11	0.00|0.00|0.31|0.00|0.00|0.48|0.00	6	0.1132	0.4775	0.8065
MRC1	TTHERM_000338239	IP_MRC1-S-3|IP_MRC1-S-2|IP_MRC1-S-1|IP_MRC1-CO-2|IP_MRC1-CO-1|IP_MRC1-C-1	0|15|9|2|23|1	50	6	0	0.00|0.00|0.00|0.00|0.02|0.00	15	0.0037	0.0225	0.8068
MRC1	TTHERM_00382350	IP_MRC1-S-3|IP_MRC1-S-2|IP_MRC1-S-1|IP_MRC1-CO-2|IP_MRC1-CO-1|IP_MRC1-C-1	0|20|7|3|30|3	63	6	0.01	0.00|0.00|0.00|0.00|0.02|0.00	19	0.0037	0.0225	0.8068
MRC1	TTHERM_00439000	IP_MRC1-S-3|IP_MRC1-S-2|IP_MRC1-S-1|IP_MRC1-CO-2|IP_MRC1-CO-1|IP_MRC1-C-1	0|2|2|0|1|0	5	6	0	0.00|0.00|0.02|0.00|0.00|0.00	2	0.0037	0.0175	0.8068
MRC1	TTHERM_01048110	IP_MRC1-S-3|IP_MRC1-S-2|IP_MRC1-S-1|IP_MRC1-CO-2|IP_MRC1-CO-1|IP_MRC1-C-1	0|2|1|1|2|1	7	6	0	0.00|0.01|0.00|0.00|0.00|0.00	2	0.0037	0.01	0.8068
MTA	TTHERM_00545810	IP_AHA-S-2|IP_AHA-S-1|IP_AHA-CO-2|IP_AHA-CO-1|IP_AHA-C-3|IP_AHA-C-2|IP_AHA-C-1	2|0|0|0|0|0|0	2	7	0.11	0.79|0.00|0.00|0.00|0.00|0.00|0.00	0	0.1132	0.7925	0.8073
MTA	TTHERM_00216040	IP_AHA-S-2|IP_AHA-S-1|IP_AHA-CO-2|IP_AHA-CO-1|IP_AHA-C-3|IP_AHA-C-2|IP_AHA-C-1	3|0|0|0|0|0|0	3	7	0.13	0.79|0.00|0.00|0.00|0.00|0.00|0.00	0	0.1132	0.7925	0.8073
MTA	TTHERM_000773078	IP_AHA-S-2|IP_AHA-S-1|IP_AHA-CO-2|IP_AHA-CO-1|IP_AHA-C-3|IP_AHA-C-2|IP_AHA-C-1	2|0|0|0|0|0|0	2	7	0.1	0.79|0.00|0.00|0.00|0.00|0.00|0.00	0	0.1132	0.7925	0.8073
MTA	TTHERM_01013180	IP_AHA-S-2|IP_AHA-S-1|IP_AHA-CO-2|IP_AHA-CO-1|IP_AHA-C-3|IP_AHA-C-2|IP_AHA-C-1	0|0|2|0|0|0|0	2	7	0.09	0.00|0.00|0.79|0.00|0.00|0.00|0.00	0	0.1132	0.7925	0.8073
MRC1	TTHERM_00694350	IP_MRC1-S-3|IP_MRC1-S-2|IP_MRC1-S-1|IP_MRC1-CO-2|IP_MRC1-CO-1|IP_MRC1-C-1	0|2|0|1|4|0	7	6	0	0.00|0.00|0.00|0.00|0.02|0.00	3	0.0033	0.02	0.8073
MTA	TTHERM_00584840	IP_AHA-S-2|IP_AHA-S-1|IP_AHA-CO-2|IP_AHA-CO-1|IP_AHA-C-3|IP_AHA-C-2|IP_AHA-C-1	0|0|0|0|2|0|0	2	7	0.1	0.00|0.00|0.00|0.00|0.79|0.00|0.00	0	0.1129	0.79	0.8081
MTA	TTHERM_00571780	IP_AHA-S-2|IP_AHA-S-1|IP_AHA-CO-2|IP_AHA-CO-1|IP_AHA-C-3|IP_AHA-C-2|IP_AHA-C-1	0|0|0|0|2|0|0	2	7	0.13	0.00|0.00|0.00|0.00|0.79|0.00|0.00	0	0.1129	0.79	0.8081
MTA	TTHERM_00295640	IP_AHA-S-2|IP_AHA-S-1|IP_AHA-CO-2|IP_AHA-CO-1|IP_AHA-C-3|IP_AHA-C-2|IP_AHA-C-1	0|0|0|0|0|2|0	2	7	0.11	0.00|0.00|0.00|0.00|0.00|0.79|0.00	0	0.1129	0.79	0.8081
MTA	TTHERM_00446400	IP_AHA-S-2|IP_AHA-S-1|IP_AHA-CO-2|IP_AHA-CO-1|IP_AHA-C-3|IP_AHA-C-2|IP_AHA-C-1	0|0|0|0|2|0|0	2	7	0.1	0.00|0.00|0.00|0.00|0.79|0.00|0.00	0	0.1129	0.79	0.8081
MTA	TTHERM_00559720	IP_AHA-S-2|IP_AHA-S-1|IP_AHA-CO-2|IP_AHA-CO-1|IP_AHA-C-3|IP_AHA-C-2|IP_AHA-C-1	0|0|0|0|2|0|0	2	7	0.11	0.00|0.00|0.00|0.00|0.79|0.00|0.00	0	0.1125	0.7875	0.8083
MTA	TTHERM_00140890	IP_AHA-S-2|IP_AHA-S-1|IP_AHA-CO-2|IP_AHA-CO-1|IP_AHA-C-3|IP_AHA-C-2|IP_AHA-C-1	2|0|0|0|0|0|0	2	7	0.12	0.78|0.00|0.00|0.00|0.00|0.00|0.00	0	0.1121	0.785	0.8085
MTA	TTHERM_00896100	IP_AHA-S-2|IP_AHA-S-1|IP_AHA-CO-2|IP_AHA-CO-1|IP_AHA-C-3|IP_AHA-C-2|IP_AHA-C-1	0|0|2|0|0|0|0	2	7	0.12	0.00|0.00|0.78|0.00|0.00|0.00|0.00	0	0.1118	0.7825	0.8087
MTA	TTHERM_01094790	IP_AHA-S-2|IP_AHA-S-1|IP_AHA-CO-2|IP_AHA-CO-1|IP_AHA-C-3|IP_AHA-C-2|IP_AHA-C-1	0|2|2|0|24|0|0	28	7	0.11	0.00|0.00|0.00|0.00|0.78|0.00|0.00	16	0.1114	0.78	0.809
MTA	TTHERM_00329720	IP_AHA-S-2|IP_AHA-S-1|IP_AHA-CO-2|IP_AHA-CO-1|IP_AHA-C-3|IP_AHA-C-2|IP_AHA-C-1	2|0|0|0|0|0|0	2	7	0.12	0.78|0.00|0.00|0.00|0.00|0.00|0.00	0	0.1114	0.78	0.809
MRC1	TTHERM_00486790	IP_MRC1-S-3|IP_MRC1-S-2|IP_MRC1-S-1|IP_MRC1-CO-2|IP_MRC1-CO-1|IP_MRC1-C-1	0|0|0|0|0|2	2	6	0	0.00|0.00|0.00|0.00|0.00|0.02	2	0.0029	0.0175	0.8093
MRC1	TTHERM_00136430	IP_MRC1-S-3|IP_MRC1-S-2|IP_MRC1-S-1|IP_MRC1-CO-2|IP_MRC1-CO-1|IP_MRC1-C-1	0|0|0|2|1|0	3	6	0	0.00|0.00|0.00|0.02|0.00|0.00	2	0.0029	0.0175	0.8093
MRC1	TTHERM_01513250	IP_MRC1-S-3|IP_MRC1-S-2|IP_MRC1-S-1|IP_MRC1-CO-2|IP_MRC1-CO-1|IP_MRC1-C-1	0|0|0|2|0|0	2	6	0	0.00|0.00|0.00|0.02|0.00|0.00	2	0.0029	0.0175	0.8093
MRC1	TTHERM_000133669	IP_MRC1-S-3|IP_MRC1-S-2|IP_MRC1-S-1|IP_MRC1-CO-2|IP_MRC1-CO-1|IP_MRC1-C-1	0|2|2|0|1|0	5	6	0	0.00|0.01|0.01|0.00|0.00|0.00	2	0.0029	0.0075	0.8093
MTA	TTHERM_00592830	IP_AHA-S-2|IP_AHA-S-1|IP_AHA-CO-2|IP_AHA-CO-1|IP_AHA-C-3|IP_AHA-C-2|IP_AHA-C-1	0|2|0|0|0|0|0	2	7	0.09	0.00|0.78|0.00|0.00|0.00|0.00|0.00	0	0.1111	0.7775	0.8094
MTA	TTHERM_01093560	IP_AHA-S-2|IP_AHA-S-1|IP_AHA-CO-2|IP_AHA-CO-1|IP_AHA-C-3|IP_AHA-C-2|IP_AHA-C-1	0|0|0|0|0|2|0	2	7	0.11	0.00|0.00|0.00|0.00|0.00|0.78|0.00	0	0.1111	0.7775	0.8094
MTA	TTHERM_00016170	IP_AHA-S-2|IP_AHA-S-1|IP_AHA-CO-2|IP_AHA-CO-1|IP_AHA-C-3|IP_AHA-C-2|IP_AHA-C-1	0|0|2|0|0|0|0	2	7	0.11	0.00|0.00|0.77|0.00|0.00|0.00|0.00	0	0.1104	0.7725	0.81
MTA	TTHERM_00024440	IP_AHA-S-2|IP_AHA-S-1|IP_AHA-CO-2|IP_AHA-CO-1|IP_AHA-C-3|IP_AHA-C-2|IP_AHA-C-1	0|0|2|0|0|0|0	2	7	0.11	0.00|0.00|0.77|0.00|0.00|0.00|0.00	0	0.1104	0.7725	0.81
MTA	TTHERM_00346410	IP_AHA-S-2|IP_AHA-S-1|IP_AHA-CO-2|IP_AHA-CO-1|IP_AHA-C-3|IP_AHA-C-2|IP_AHA-C-1	1|0|4|0|0|6|0	11	7	0.1	0.00|0.00|0.01|0.00|0.00|0.76|0.00	3	0.1104	0.765	0.81
MTA	TTHERM_00239260	IP_AHA-S-2|IP_AHA-S-1|IP_AHA-CO-2|IP_AHA-CO-1|IP_AHA-C-3|IP_AHA-C-2|IP_AHA-C-1	0|0|2|0|0|0|0	2	7	0.09	0.00|0.00|0.77|0.00|0.00|0.00|0.00	0	0.11	0.77	0.8102
MTA	TTHERM_00019680	IP_AHA-S-2|IP_AHA-S-1|IP_AHA-CO-2|IP_AHA-CO-1|IP_AHA-C-3|IP_AHA-C-2|IP_AHA-C-1	0|2|0|0|0|0|0	2	7	0.14	0.00|0.77|0.00|0.00|0.00|0.00|0.00	0	0.1096	0.7675	0.8104
MTA	TTHERM_00185200	IP_AHA-S-2|IP_AHA-S-1|IP_AHA-CO-2|IP_AHA-CO-1|IP_AHA-C-3|IP_AHA-C-2|IP_AHA-C-1	0|0|0|0|0|2|0	2	7	0.13	0.00|0.00|0.00|0.00|0.00|0.76|0.00	0	0.1089	0.7625	0.8106
MTA	TTHERM_00974260	IP_AHA-S-2|IP_AHA-S-1|IP_AHA-CO-2|IP_AHA-CO-1|IP_AHA-C-3|IP_AHA-C-2|IP_AHA-C-1	0|0|2|0|0|0|0	2	7	0.08	0.00|0.00|0.76|0.00|0.00|0.00|0.00	0	0.1086	0.76	0.8112
MTA	TTHERM_00427590	IP_AHA-S-2|IP_AHA-S-1|IP_AHA-CO-2|IP_AHA-CO-1|IP_AHA-C-3|IP_AHA-C-2|IP_AHA-C-1	0|0|2|0|0|0|0	2	7	0.13	0.00|0.00|0.76|0.00|0.00|0.00|0.00	0	0.1086	0.76	0.8112
MTA	TTHERM_00101160	IP_AHA-S-2|IP_AHA-S-1|IP_AHA-CO-2|IP_AHA-CO-1|IP_AHA-C-3|IP_AHA-C-2|IP_AHA-C-1	2|0|0|0|0|0|0	2	7	0.11	0.76|0.00|0.00|0.00|0.00|0.00|0.00	0	0.1086	0.76	0.8112
MTA	TTHERM_01008630	IP_AHA-S-2|IP_AHA-S-1|IP_AHA-CO-2|IP_AHA-CO-1|IP_AHA-C-3|IP_AHA-C-2|IP_AHA-C-1	2|0|0|0|0|0|0	2	7	0.11	0.75|0.00|0.00|0.00|0.00|0.00|0.00	0	0.1079	0.755	0.8118
MTA	TTHERM_00823720	IP_AHA-S-2|IP_AHA-S-1|IP_AHA-CO-2|IP_AHA-CO-1|IP_AHA-C-3|IP_AHA-C-2|IP_AHA-C-1	2|0|0|0|0|0|0	2	7	0.11	0.75|0.00|0.00|0.00|0.00|0.00|0.00	0	0.1079	0.755	0.8118
MTA	TTHERM_000157889	IP_AHA-S-2|IP_AHA-S-1|IP_AHA-CO-2|IP_AHA-CO-1|IP_AHA-C-3|IP_AHA-C-2|IP_AHA-C-1	0|0|2|0|0|0|0	2	7	0.13	0.00|0.00|0.75|0.00|0.00|0.00|0.00	0	0.1079	0.755	0.8118
MTA	TTHERM_00822340	IP_AHA-S-2|IP_AHA-S-1|IP_AHA-CO-2|IP_AHA-CO-1|IP_AHA-C-3|IP_AHA-C-2|IP_AHA-C-1	0|0|2|0|0|0|0	2	7	0.11	0.00|0.00|0.75|0.00|0.00|0.00|0.00	0	0.1075	0.7525	0.812
MTA	TTHERM_00695590	IP_AHA-S-2|IP_AHA-S-1|IP_AHA-CO-2|IP_AHA-CO-1|IP_AHA-C-3|IP_AHA-C-2|IP_AHA-C-1	0|0|2|0|0|0|0	2	7	0.12	0.00|0.00|0.75|0.00|0.00|0.00|0.00	0	0.1071	0.75	0.8123
MTA	TTHERM_00388370	IP_AHA-S-2|IP_AHA-S-1|IP_AHA-CO-2|IP_AHA-CO-1|IP_AHA-C-3|IP_AHA-C-2|IP_AHA-C-1	0|0|2|0|0|0|0	2	7	0.11	0.00|0.00|0.75|0.00|0.00|0.00|0.00	0	0.1071	0.75	0.8123
MTA	TTHERM_00825190	IP_AHA-S-2|IP_AHA-S-1|IP_AHA-CO-2|IP_AHA-CO-1|IP_AHA-C-3|IP_AHA-C-2|IP_AHA-C-1	0|4|1|0|0|0|0	5	7	0.11	0.00|0.75|0.00|0.00|0.00|0.00|0.00	2	0.1068	0.7475	0.8125
MRC1	TTHERM_00823670	IP_MRC1-S-3|IP_MRC1-S-2|IP_MRC1-S-1|IP_MRC1-CO-2|IP_MRC1-CO-1|IP_MRC1-C-1	0|15|2|0|13|1	31	6	0	0.00|0.01|0.00|0.00|0.00|0.00	11	0.0025	0.015	0.8126
MRC1	TTHERM_00085180	IP_MRC1-S-3|IP_MRC1-S-2|IP_MRC1-S-1|IP_MRC1-CO-2|IP_MRC1-CO-1|IP_MRC1-C-1	0|13|4|0|24|0	41	6	0	0.00|0.00|0.00|0.00|0.01|0.00	14	0.0025	0.015	0.8126
MRC1	TTHERM_00140920	IP_MRC1-S-3|IP_MRC1-S-2|IP_MRC1-S-1|IP_MRC1-CO-2|IP_MRC1-CO-1|IP_MRC1-C-1	0|0|0|0|2|0	2	6	0	0.00|0.00|0.00|0.00|0.01|0.00	2	0.0025	0.015	0.8126
MRC1	TTHERM_00835120	IP_MRC1-S-3|IP_MRC1-S-2|IP_MRC1-S-1|IP_MRC1-CO-2|IP_MRC1-CO-1|IP_MRC1-C-1	0|0|0|0|0|2	2	6	0	0.00|0.00|0.00|0.00|0.00|0.01	2	0.0025	0.015	0.8126
MRC1	TTHERM_00662750	IP_MRC1-S-3|IP_MRC1-S-2|IP_MRC1-S-1|IP_MRC1-CO-2|IP_MRC1-CO-1|IP_MRC1-C-1	0|0|6|0|4|0	10	6	0.01	0.00|0.00|0.01|0.00|0.00|0.00	5	0.0025	0.015	0.8126
MRC1	TTHERM_00444850	IP_MRC1-S-3|IP_MRC1-S-2|IP_MRC1-S-1|IP_MRC1-CO-2|IP_MRC1-CO-1|IP_MRC1-C-1	0|1|0|0|1|2	4	6	0	0.00|0.00|0.00|0.00|0.00|0.01	2	0.0025	0.0125	0.8126
MRC1	TTHERM_00035520	IP_MRC1-S-3|IP_MRC1-S-2|IP_MRC1-S-1|IP_MRC1-CO-2|IP_MRC1-CO-1|IP_MRC1-C-1	0|2|0|0|2|1	5	6	0	0.00|0.00|0.00|0.00|0.01|0.00	2	0.0025	0.01	0.8126
MTA	TTHERM_000287919	IP_AHA-S-2|IP_AHA-S-1|IP_AHA-CO-2|IP_AHA-CO-1|IP_AHA-C-3|IP_AHA-C-2|IP_AHA-C-1	0|0|5|0|0|5|0	10	7	0.12	0.00|0.00|0.30|0.00|0.00|0.45|0.00	3	0.1068	0.45	0.8127
MTA	TTHERM_00147570	IP_AHA-S-2|IP_AHA-S-1|IP_AHA-CO-2|IP_AHA-CO-1|IP_AHA-C-3|IP_AHA-C-2|IP_AHA-C-1	0|0|2|0|0|0|0	2	7	0.11	0.00|0.00|0.75|0.00|0.00|0.00|0.00	0	0.1064	0.745	0.8131
MTA	TTHERM_000688599	IP_AHA-S-2|IP_AHA-S-1|IP_AHA-CO-2|IP_AHA-CO-1|IP_AHA-C-3|IP_AHA-C-2|IP_AHA-C-1	0|0|5|0|0|0|0	5	7	0.09	0.00|0.00|0.75|0.00|0.00|0.00|0.00	2	0.1064	0.745	0.8131
MRC1	TTHERM_01207690	IP_MRC1-S-3|IP_MRC1-S-2|IP_MRC1-S-1|IP_MRC1-CO-2|IP_MRC1-CO-1|IP_MRC1-C-1	0|14|4|5|4|11	38	6	0	0.00|0.01|0.00|0.00|0.00|0.00	10	0.0021	0.0125	0.8131
MTA	TTHERM_00149980	IP_AHA-S-2|IP_AHA-S-1|IP_AHA-CO-2|IP_AHA-CO-1|IP_AHA-C-3|IP_AHA-C-2|IP_AHA-C-1	0|0|2|0|0|0|0	2	7	0.1	0.00|0.00|0.74|0.00|0.00|0.00|0.00	0	0.1061	0.7425	0.8135
MTA	TTHERM_00317200	IP_AHA-S-2|IP_AHA-S-1|IP_AHA-CO-2|IP_AHA-CO-1|IP_AHA-C-3|IP_AHA-C-2|IP_AHA-C-1	0|0|2|0|0|0|0	2	7	0.11	0.00|0.00|0.74|0.00|0.00|0.00|0.00	0	0.1061	0.7425	0.8135
MTA	TTHERM_00755880	IP_AHA-S-2|IP_AHA-S-1|IP_AHA-CO-2|IP_AHA-CO-1|IP_AHA-C-3|IP_AHA-C-2|IP_AHA-C-1	0|0|2|0|0|0|0	2	7	0.13	0.00|0.00|0.74|0.00|0.00|0.00|0.00	0	0.1057	0.74	0.8138
MTA	TTHERM_00494580	IP_AHA-S-2|IP_AHA-S-1|IP_AHA-CO-2|IP_AHA-CO-1|IP_AHA-C-3|IP_AHA-C-2|IP_AHA-C-1	0|0|2|0|0|0|0	2	7	0.09	0.00|0.00|0.74|0.00|0.00|0.00|0.00	0	0.1057	0.74	0.8138
MTA	TTHERM_00727840	IP_AHA-S-2|IP_AHA-S-1|IP_AHA-CO-2|IP_AHA-CO-1|IP_AHA-C-3|IP_AHA-C-2|IP_AHA-C-1	0|0|2|0|0|0|0	2	7	0.11	0.00|0.00|0.74|0.00|0.00|0.00|0.00	0	0.1054	0.7375	0.8142
MTA	TTHERM_00476670	IP_AHA-S-2|IP_AHA-S-1|IP_AHA-CO-2|IP_AHA-CO-1|IP_AHA-C-3|IP_AHA-C-2|IP_AHA-C-1	3|2|26|0|0|9|0	40	7	0.12	0.00|0.00|0.74|0.00|0.00|0.00|0.00	13	0.1054	0.7375	0.8142
MTA	TTHERM_00471560	IP_AHA-S-2|IP_AHA-S-1|IP_AHA-CO-2|IP_AHA-CO-1|IP_AHA-C-3|IP_AHA-C-2|IP_AHA-C-1	0|0|2|0|0|0|0	2	7	0.14	0.00|0.00|0.73|0.00|0.00|0.00|0.00	0	0.105	0.735	0.8144
MRC1	TTHERM_00053800	IP_MRC1-S-3|IP_MRC1-S-2|IP_MRC1-S-1|IP_MRC1-CO-2|IP_MRC1-CO-1|IP_MRC1-C-1	0|2|1|0|1|3	7	6	0	0.00|0.00|0.00|0.00|0.00|0.01	3	0.0017	0.01	0.8145
MRC1	TTHERM_00488350	IP_MRC1-S-3|IP_MRC1-S-2|IP_MRC1-S-1|IP_MRC1-CO-2|IP_MRC1-CO-1|IP_MRC1-C-1	0|0|0|2|0|1	3	6	0	0.00|0.00|0.00|0.01|0.00|0.00	2	0.0017	0.01	0.8145
MRC1	TTHERM_00051720	IP_MRC1-S-3|IP_MRC1-S-2|IP_MRC1-S-1|IP_MRC1-CO-2|IP_MRC1-CO-1|IP_MRC1-C-1	0|2|0|9|4|0	15	6	0	0.00|0.00|0.00|0.01|0.00|0.00	7	0.0017	0.01	0.8145
MTA	TTHERM_00056000	IP_AHA-S-2|IP_AHA-S-1|IP_AHA-CO-2|IP_AHA-CO-1|IP_AHA-C-3|IP_AHA-C-2|IP_AHA-C-1	0|0|2|0|0|0|0	2	7	0.12	0.00|0.00|0.73|0.00|0.00|0.00|0.00	0	0.1046	0.7325	0.8148
MTA	TTHERM_00101150	IP_AHA-S-2|IP_AHA-S-1|IP_AHA-CO-2|IP_AHA-CO-1|IP_AHA-C-3|IP_AHA-C-2|IP_AHA-C-1	0|0|2|0|0|0|0	2	7	0.1	0.00|0.00|0.73|0.00|0.00|0.00|0.00	0	0.1046	0.7325	0.8148
MTA	TTHERM_00035270	IP_AHA-S-2|IP_AHA-S-1|IP_AHA-CO-2|IP_AHA-CO-1|IP_AHA-C-3|IP_AHA-C-2|IP_AHA-C-1	0|0|0|0|0|2|0	2	7	0.11	0.00|0.00|0.00|0.00|0.00|0.73|0.00	0	0.1043	0.73	0.8153
MTA	TTHERM_00317490	IP_AHA-S-2|IP_AHA-S-1|IP_AHA-CO-2|IP_AHA-CO-1|IP_AHA-C-3|IP_AHA-C-2|IP_AHA-C-1	0|0|2|0|0|0|0	2	7	0.1	0.00|0.00|0.73|0.00|0.00|0.00|0.00	0	0.1043	0.73	0.8153
MTA	TTHERM_00279940	IP_AHA-S-2|IP_AHA-S-1|IP_AHA-CO-2|IP_AHA-CO-1|IP_AHA-C-3|IP_AHA-C-2|IP_AHA-C-1	0|0|2|0|0|0|0	2	7	0.09	0.00|0.00|0.73|0.00|0.00|0.00|0.00	0	0.1043	0.73	0.8153
MTA	TTHERM_00584860	IP_AHA-S-2|IP_AHA-S-1|IP_AHA-CO-2|IP_AHA-CO-1|IP_AHA-C-3|IP_AHA-C-2|IP_AHA-C-1	0|0|2|0|0|0|0	2	7	0.1	0.00|0.00|0.73|0.00|0.00|0.00|0.00	0	0.1039	0.7275	0.8157
MTA	TTHERM_001102810	IP_AHA-S-2|IP_AHA-S-1|IP_AHA-CO-2|IP_AHA-CO-1|IP_AHA-C-3|IP_AHA-C-2|IP_AHA-C-1	0|0|2|0|0|0|0	2	7	0.11	0.00|0.00|0.73|0.00|0.00|0.00|0.00	0	0.1039	0.7275	0.8157
MTA	TTHERM_00726180	IP_AHA-S-2|IP_AHA-S-1|IP_AHA-CO-2|IP_AHA-CO-1|IP_AHA-C-3|IP_AHA-C-2|IP_AHA-C-1	0|0|2|0|0|0|0	2	7	0.12	0.00|0.00|0.72|0.00|0.00|0.00|0.00	0	0.1036	0.725	0.8161
MTA	TTHERM_00481330	IP_AHA-S-2|IP_AHA-S-1|IP_AHA-CO-2|IP_AHA-CO-1|IP_AHA-C-3|IP_AHA-C-2|IP_AHA-C-1	0|0|2|0|0|0|0	2	7	0.12	0.00|0.00|0.72|0.00|0.00|0.00|0.00	0	0.1036	0.725	0.8161
MTA	TTHERM_00564280	IP_AHA-S-2|IP_AHA-S-1|IP_AHA-CO-2|IP_AHA-CO-1|IP_AHA-C-3|IP_AHA-C-2|IP_AHA-C-1	0|0|8|0|0|2|0	10	7	0.11	0.00|0.00|0.72|0.00|0.00|0.00|0.00	4	0.1032	0.7225	0.8162
MTA	TTHERM_000476709	IP_AHA-S-2|IP_AHA-S-1|IP_AHA-CO-2|IP_AHA-CO-1|IP_AHA-C-3|IP_AHA-C-2|IP_AHA-C-1	0|0|2|0|0|0|0	2	7	0.1	0.00|0.00|0.72|0.00|0.00|0.00|0.00	0	0.1029	0.72	0.8166
MTA	TTHERM_00467959	IP_AHA-S-2|IP_AHA-S-1|IP_AHA-CO-2|IP_AHA-CO-1|IP_AHA-C-3|IP_AHA-C-2|IP_AHA-C-1	0|0|2|0|0|0|0	2	7	0.09	0.00|0.00|0.72|0.00|0.00|0.00|0.00	0	0.1029	0.72	0.8166
MTA	TTHERM_00193950	IP_AHA-S-2|IP_AHA-S-1|IP_AHA-CO-2|IP_AHA-CO-1|IP_AHA-C-3|IP_AHA-C-2|IP_AHA-C-1	0|0|2|0|0|0|0	2	7	0.11	0.00|0.00|0.71|0.00|0.00|0.00|0.00	0	0.1021	0.715	0.817
MTA	TTHERM_00653940	IP_AHA-S-2|IP_AHA-S-1|IP_AHA-CO-2|IP_AHA-CO-1|IP_AHA-C-3|IP_AHA-C-2|IP_AHA-C-1	0|0|2|0|0|0|0	2	7	0.1	0.00|0.00|0.71|0.00|0.00|0.00|0.00	0	0.1021	0.715	0.817
MTA	TTHERM_00304130	IP_AHA-S-2|IP_AHA-S-1|IP_AHA-CO-2|IP_AHA-CO-1|IP_AHA-C-3|IP_AHA-C-2|IP_AHA-C-1	0|0|2|0|0|0|0	2	7	0.08	0.00|0.00|0.71|0.00|0.00|0.00|0.00	0	0.1018	0.7125	0.8172
MTA	TTHERM_00016600	IP_AHA-S-2|IP_AHA-S-1|IP_AHA-CO-2|IP_AHA-CO-1|IP_AHA-C-3|IP_AHA-C-2|IP_AHA-C-1	0|0|2|0|0|0|0	2	7	0.11	0.00|0.00|0.71|0.00|0.00|0.00|0.00	0	0.1014	0.71	0.8175
MTA	TTHERM_00933070	IP_AHA-S-2|IP_AHA-S-1|IP_AHA-CO-2|IP_AHA-CO-1|IP_AHA-C-3|IP_AHA-C-2|IP_AHA-C-1	0|0|2|0|0|0|0	2	7	0.09	0.00|0.00|0.71|0.00|0.00|0.00|0.00	0	0.1014	0.71	0.8175
MRC1	TTHERM_00134940	IP_MRC1-S-3|IP_MRC1-S-2|IP_MRC1-S-1|IP_MRC1-CO-2|IP_MRC1-CO-1|IP_MRC1-C-1	0|15|8|2|23|2	50	6	0	0.00|0.00|0.00|0.00|0.01|0.00	14	0.0012	0.0075	0.8177
MRC1	TTHERM_00190830	IP_MRC1-S-3|IP_MRC1-S-2|IP_MRC1-S-1|IP_MRC1-CO-2|IP_MRC1-CO-1|IP_MRC1-C-1	0|2|0|4|5|3	14	6	0	0.00|0.00|0.00|0.01|0.00|0.00	4	0.0012	0.0075	0.8177
MRC1	TTHERM_000287919	IP_MRC1-S-3|IP_MRC1-S-2|IP_MRC1-S-1|IP_MRC1-CO-2|IP_MRC1-CO-1|IP_MRC1-C-1	0|4|0|0|0|0	4	6	0	0.00|0.01|0.00|0.00|0.00|0.00	3	0.0012	0.0075	0.8177
MRC1	TTHERM_00558550	IP_MRC1-S-3|IP_MRC1-S-2|IP_MRC1-S-1|IP_MRC1-CO-2|IP_MRC1-CO-1|IP_MRC1-C-1	0|4|0|0|1|1	6	6	0	0.00|0.01|0.00|0.00|0.00|0.00	3	0.0012	0.0075	0.8177
MRC1	TTHERM_00149280	IP_MRC1-S-3|IP_MRC1-S-2|IP_MRC1-S-1|IP_MRC1-CO-2|IP_MRC1-CO-1|IP_MRC1-C-1	0|2|0|0|0|0	2	6	0	0.00|0.01|0.00|0.00|0.00|0.00	2	0.0012	0.0075	0.8177
MRC1	TTHERM_00850590	IP_MRC1-S-3|IP_MRC1-S-2|IP_MRC1-S-1|IP_MRC1-CO-2|IP_MRC1-CO-1|IP_MRC1-C-1	0|0|2|4|1|0	7	6	0	0.00|0.00|0.00|0.01|0.00|0.00	4	0.0012	0.0075	0.8177
MRC1	TTHERM_00102830	IP_MRC1-S-3|IP_MRC1-S-2|IP_MRC1-S-1|IP_MRC1-CO-2|IP_MRC1-CO-1|IP_MRC1-C-1	0|4|0|11|4|2	21	6	0	0.00|0.00|0.00|0.01|0.00|0.00	10	0.0012	0.0075	0.8177
MTA	TTHERM_00766500	IP_AHA-S-2|IP_AHA-S-1|IP_AHA-CO-2|IP_AHA-CO-1|IP_AHA-C-3|IP_AHA-C-2|IP_AHA-C-1	0|0|2|0|0|0|0	2	7	0.11	0.00|0.00|0.71|0.00|0.00|0.00|0.00	0	0.1011	0.7075	0.8179
MTA	TTHERM_00684530	IP_AHA-S-2|IP_AHA-S-1|IP_AHA-CO-2|IP_AHA-CO-1|IP_AHA-C-3|IP_AHA-C-2|IP_AHA-C-1	0|0|2|0|0|0|0	2	7	0.09	0.00|0.00|0.71|0.00|0.00|0.00|0.00	0	0.1011	0.7075	0.8179
MTA	TTHERM_00697430	IP_AHA-S-2|IP_AHA-S-1|IP_AHA-CO-2|IP_AHA-CO-1|IP_AHA-C-3|IP_AHA-C-2|IP_AHA-C-1	0|0|2|0|0|0|0	2	7	0.07	0.00|0.00|0.70|0.00|0.00|0.00|0.00	0	0.1007	0.705	0.8182
MTA	TTHERM_00332200	IP_AHA-S-2|IP_AHA-S-1|IP_AHA-CO-2|IP_AHA-CO-1|IP_AHA-C-3|IP_AHA-C-2|IP_AHA-C-1	0|0|2|0|0|0|0	2	7	0.09	0.00|0.00|0.70|0.00|0.00|0.00|0.00	0	0.1007	0.705	0.8182
MTA	TTHERM_00780710	IP_AHA-S-2|IP_AHA-S-1|IP_AHA-CO-2|IP_AHA-CO-1|IP_AHA-C-3|IP_AHA-C-2|IP_AHA-C-1	0|0|2|0|0|0|0	2	7	0.09	0.00|0.00|0.70|0.00|0.00|0.00|0.00	0	0.0996	0.6975	0.8184
MTA	TTHERM_00535170	IP_AHA-S-2|IP_AHA-S-1|IP_AHA-CO-2|IP_AHA-CO-1|IP_AHA-C-3|IP_AHA-C-2|IP_AHA-C-1	0|0|0|0|0|0|2	2	7	0.1	0.00|0.00|0.00|0.00|0.00|0.00|0.69	0	0.0982	0.6875	0.8188
MTA	TTHERM_00355130	IP_AHA-S-2|IP_AHA-S-1|IP_AHA-CO-2|IP_AHA-CO-1|IP_AHA-C-3|IP_AHA-C-2|IP_AHA-C-1	0|0|2|0|0|0|0	2	7	0.07	0.00|0.00|0.69|0.00|0.00|0.00|0.00	0	0.0982	0.6875	0.8188
MTA	TTHERM_00721630	IP_AHA-S-2|IP_AHA-S-1|IP_AHA-CO-2|IP_AHA-CO-1|IP_AHA-C-3|IP_AHA-C-2|IP_AHA-C-1	0|0|2|0|0|0|0	2	7	0.13	0.00|0.00|0.68|0.00|0.00|0.00|0.00	0	0.0975	0.6825	0.8191
MTA	TTHERM_00786930	IP_AHA-S-2|IP_AHA-S-1|IP_AHA-CO-2|IP_AHA-CO-1|IP_AHA-C-3|IP_AHA-C-2|IP_AHA-C-1	0|1|5|0|1|7|0	14	7	0.1	0.00|0.00|0.01|0.00|0.00|0.68|0.00	4	0.0975	0.675	0.8191
MTA	TTHERM_00277550	IP_AHA-S-2|IP_AHA-S-1|IP_AHA-CO-2|IP_AHA-CO-1|IP_AHA-C-3|IP_AHA-C-2|IP_AHA-C-1	0|0|0|0|4|0|0	4	7	0.11	0.00|0.00|0.00|0.00|0.68|0.00|0.00	2	0.0971	0.68	0.8193
MTA	TTHERM_00149290	IP_AHA-S-2|IP_AHA-S-1|IP_AHA-CO-2|IP_AHA-CO-1|IP_AHA-C-3|IP_AHA-C-2|IP_AHA-C-1	0|0|2|0|0|0|0	2	7	0.08	0.00|0.00|0.66|0.00|0.00|0.00|0.00	0	0.0939	0.6575	0.8195
MTA	TTHERM_00659131	IP_AHA-S-2|IP_AHA-S-1|IP_AHA-CO-2|IP_AHA-CO-1|IP_AHA-C-3|IP_AHA-C-2|IP_AHA-C-1	0|4|2|0|5|0|0	11	7	0.1	0.00|0.16|0.00|0.00|0.49|0.00|0.00	3	0.0936	0.49	0.8197
MTA	TTHERM_00220670	IP_AHA-S-2|IP_AHA-S-1|IP_AHA-CO-2|IP_AHA-CO-1|IP_AHA-C-3|IP_AHA-C-2|IP_AHA-C-1	0|0|1|0|4|2|1	8	7	0.11	0.00|0.00|0.00|0.00|0.62|0.02|0.00	2	0.0929	0.6225	0.8201
MTA	TTHERM_00239290	IP_AHA-S-2|IP_AHA-S-1|IP_AHA-CO-2|IP_AHA-CO-1|IP_AHA-C-3|IP_AHA-C-2|IP_AHA-C-1	0|12|8|0|16|4|0	40	7	0.1	0.00|0.04|0.00|0.00|0.61|0.00|0.00	9	0.0929	0.61	0.8201
MTA	TTHERM_00074320	IP_AHA-S-2|IP_AHA-S-1|IP_AHA-CO-2|IP_AHA-CO-1|IP_AHA-C-3|IP_AHA-C-2|IP_AHA-C-1	0|0|1|0|3|4|0	8	7	0.09	0.00|0.00|0.00|0.00|0.16|0.49|0.00	2	0.0925	0.4875	0.8203
MTA	TTHERM_00085220	IP_AHA-S-2|IP_AHA-S-1|IP_AHA-CO-2|IP_AHA-CO-1|IP_AHA-C-3|IP_AHA-C-2|IP_AHA-C-1	0|5|0|0|2|0|0	7	7	0.09	0.00|0.64|0.00|0.00|0.00|0.00|0.00	3	0.0914	0.64	0.8204
MTA	TTHERM_00577090	IP_AHA-S-2|IP_AHA-S-1|IP_AHA-CO-2|IP_AHA-CO-1|IP_AHA-C-3|IP_AHA-C-2|IP_AHA-C-1	0|0|0|9|0|0|0	9	7	0.11	0.00|0.00|0.00|0.64|0.00|0.00|0.00	0	0.0911	0.6375	0.8206
MTA	TTHERM_00011910	IP_AHA-S-2|IP_AHA-S-1|IP_AHA-CO-2|IP_AHA-CO-1|IP_AHA-C-3|IP_AHA-C-2|IP_AHA-C-1	0|0|0|0|0|0|3	3	7	0.1	0.00|0.00|0.00|0.00|0.00|0.00|0.63	0	0.0896	0.6275	0.821
MTA	TTHERM_00825270	IP_AHA-S-2|IP_AHA-S-1|IP_AHA-CO-2|IP_AHA-CO-1|IP_AHA-C-3|IP_AHA-C-2|IP_AHA-C-1	0|0|0|0|0|0|4	4	7	0.09	0.00|0.00|0.00|0.00|0.00|0.00|0.63	0	0.0896	0.6275	0.821
MTA	TTHERM_00600200	IP_AHA-S-2|IP_AHA-S-1|IP_AHA-CO-2|IP_AHA-CO-1|IP_AHA-C-3|IP_AHA-C-2|IP_AHA-C-1	0|0|0|4|0|0|0	4	7	0.08	0.00|0.00|0.00|0.62|0.00|0.00|0.00	0	0.0893	0.625	0.8212
MTA	TTHERM_00058610	IP_AHA-S-2|IP_AHA-S-1|IP_AHA-CO-2|IP_AHA-CO-1|IP_AHA-C-3|IP_AHA-C-2|IP_AHA-C-1	0|1|2|0|0|9|0	12	7	0.09	0.00|0.00|0.00|0.00|0.00|0.62|0.00	5	0.0886	0.62	0.8214
MTA	TTHERM_00444510	IP_AHA-S-2|IP_AHA-S-1|IP_AHA-CO-2|IP_AHA-CO-1|IP_AHA-C-3|IP_AHA-C-2|IP_AHA-C-1	1|1|13|0|1|6|0	22	7	0.09	0.00|0.00|0.59|0.00|0.00|0.00|0.00	7	0.0839	0.5875	0.8216
MRC1	TTHERM_00151670	IP_MRC1-S-3|IP_MRC1-S-2|IP_MRC1-S-1|IP_MRC1-CO-2|IP_MRC1-CO-1|IP_MRC1-C-1	0|5|7|1|0|2	15	6	0	0.00|0.00|0.00|0.00|0.00|0.00	6	0.0008	0.005	0.8217
MRC1	TTHERM_00658950	IP_MRC1-S-3|IP_MRC1-S-2|IP_MRC1-S-1|IP_MRC1-CO-2|IP_MRC1-CO-1|IP_MRC1-C-1	0|3|0|0|0|0	3	6	0	0.00|0.00|0.00|0.00|0.00|0.00	3	0.0008	0.005	0.8217
MRC1	TTHERM_00147510	IP_MRC1-S-3|IP_MRC1-S-2|IP_MRC1-S-1|IP_MRC1-CO-2|IP_MRC1-CO-1|IP_MRC1-C-1	0|13|3|1|15|7	39	6	0	0.00|0.00|0.00|0.00|0.00|0.00	12	0.0008	0.005	0.8217
MRC1	TTHERM_00143660	IP_MRC1-S-3|IP_MRC1-S-2|IP_MRC1-S-1|IP_MRC1-CO-2|IP_MRC1-CO-1|IP_MRC1-C-1	0|0|0|0|3|0	3	6	0	0.00|0.00|0.00|0.00|0.00|0.00	3	0.0008	0.005	0.8217
MRC1	TTHERM_00499650	IP_MRC1-S-3|IP_MRC1-S-2|IP_MRC1-S-1|IP_MRC1-CO-2|IP_MRC1-CO-1|IP_MRC1-C-1	0|0|0|5|1|2	8	6	0	0.00|0.00|0.00|0.00|0.00|0.00	5	0.0008	0.005	0.8217
MRC1	TTHERM_00193230	IP_MRC1-S-3|IP_MRC1-S-2|IP_MRC1-S-1|IP_MRC1-CO-2|IP_MRC1-CO-1|IP_MRC1-C-1	2|37|11|1|29|7	87	6	0	0.00|0.00|0.00|0.00|0.00|0.00	24	0.0008	0.005	0.8217
MRC1	TTHERM_000865148	IP_MRC1-S-3|IP_MRC1-S-2|IP_MRC1-S-1|IP_MRC1-CO-2|IP_MRC1-CO-1|IP_MRC1-C-1	0|3|2|0|0|0	5	6	0	0.00|0.00|0.00|0.00|0.00|0.00	3	0.0008	0.005	0.8217
MRC1	TTHERM_00151990	IP_MRC1-S-3|IP_MRC1-S-2|IP_MRC1-S-1|IP_MRC1-CO-2|IP_MRC1-CO-1|IP_MRC1-C-1	0|1|0|0|2|0	3	6	0	0.00|0.00|0.00|0.00|0.00|0.00	2	0.0008	0.0025	0.8217
MRC1	TTHERM_00582070	IP_MRC1-S-3|IP_MRC1-S-2|IP_MRC1-S-1|IP_MRC1-CO-2|IP_MRC1-CO-1|IP_MRC1-C-1	0|2|0|0|2|1	5	6	0	0.00|0.00|0.00|0.00|0.00|0.00	2	0.0008	0.0025	0.8217
MTA	TTHERM_00530680	IP_AHA-S-2|IP_AHA-S-1|IP_AHA-CO-2|IP_AHA-CO-1|IP_AHA-C-3|IP_AHA-C-2|IP_AHA-C-1	0|0|0|0|4|0|0	4	7	0.08	0.00|0.00|0.00|0.00|0.55|0.00|0.00	2	0.0789	0.5525	0.8218
MTA	TTHERM_000128319	IP_AHA-S-2|IP_AHA-S-1|IP_AHA-CO-2|IP_AHA-CO-1|IP_AHA-C-3|IP_AHA-C-2|IP_AHA-C-1	0|9|11|0|59|6|4	89	7	0.07	0.00|0.00|0.00|0.00|0.55|0.00|0.00	37	0.0779	0.545	0.822
MTA	TTHERM_00190830	IP_AHA-S-2|IP_AHA-S-1|IP_AHA-CO-2|IP_AHA-CO-1|IP_AHA-C-3|IP_AHA-C-2|IP_AHA-C-1	0|0|1|0|6|0|0	7	7	0.08	0.00|0.00|0.00|0.00|0.54|0.00|0.00	4	0.0768	0.5375	0.8222
MTA	TTHERM_00196650	IP_AHA-S-2|IP_AHA-S-1|IP_AHA-CO-2|IP_AHA-CO-1|IP_AHA-C-3|IP_AHA-C-2|IP_AHA-C-1	0|1|1|0|9|4|0	15	7	0.07	0.00|0.00|0.00|0.00|0.52|0.00|0.00	6	0.075	0.525	0.8225
MTA	TTHERM_00549480	IP_AHA-S-2|IP_AHA-S-1|IP_AHA-CO-2|IP_AHA-CO-1|IP_AHA-C-3|IP_AHA-C-2|IP_AHA-C-1	2|2|2|0|0|4|0	10	7	0.05	0.04|0.01|0.01|0.00|0.00|0.45|0.00	2	0.0732	0.4475	0.8227
MTA	TTHERM_01308050	IP_AHA-S-2|IP_AHA-S-1|IP_AHA-CO-2|IP_AHA-CO-1|IP_AHA-C-3|IP_AHA-C-2|IP_AHA-C-1	2|4|13|0|1|6|1	27	7	0.06	0.00|0.00|0.50|0.00|0.00|0.00|0.00	7	0.0718	0.5025	0.8231
MTA	TTHERM_00259410	IP_AHA-S-2|IP_AHA-S-1|IP_AHA-CO-2|IP_AHA-CO-1|IP_AHA-C-3|IP_AHA-C-2|IP_AHA-C-1	0|3|4|0|0|0|0	7	7	0.07	0.00|0.21|0.29|0.00|0.00|0.00|0.00	2	0.0718	0.2925	0.8231
MTA	TTHERM_00295340	IP_AHA-S-2|IP_AHA-S-1|IP_AHA-CO-2|IP_AHA-CO-1|IP_AHA-C-3|IP_AHA-C-2|IP_AHA-C-1	0|7|27|0|1|8|0	43	7	0.08	0.00|0.00|0.49|0.00|0.00|0.00|0.00	15	0.0707	0.495	0.8233
MTA	TTHERM_00670340	IP_AHA-S-2|IP_AHA-S-1|IP_AHA-CO-2|IP_AHA-CO-1|IP_AHA-C-3|IP_AHA-C-2|IP_AHA-C-1	0|3|0|0|13|0|4	20	7	0.05	0.00|0.00|0.00|0.00|0.49|0.00|0.00	8	0.07	0.49	0.8236
MTA	TTHERM_01048110	IP_AHA-S-2|IP_AHA-S-1|IP_AHA-CO-2|IP_AHA-CO-1|IP_AHA-C-3|IP_AHA-C-2|IP_AHA-C-1	1|2|2|0|0|4|0	9	7	0.09	0.00|0.02|0.01|0.00|0.00|0.45|0.00	2	0.0689	0.455	0.8238
MTA	TTHERM_00492510	IP_AHA-S-2|IP_AHA-S-1|IP_AHA-CO-2|IP_AHA-CO-1|IP_AHA-C-3|IP_AHA-C-2|IP_AHA-C-1	0|0|4|0|0|1|0	5	7	0.05	0.00|0.00|0.47|0.00|0.00|0.01|0.00	2	0.0686	0.4725	0.824
MTA	TTHERM_00492850	IP_AHA-S-2|IP_AHA-S-1|IP_AHA-CO-2|IP_AHA-CO-1|IP_AHA-C-3|IP_AHA-C-2|IP_AHA-C-1	0|2|1|0|5|0|0	8	7	0.05	0.00|0.00|0.00|0.00|0.45|0.00|0.00	3	0.0654	0.455	0.8242
MTA	TTHERM_00285620	IP_AHA-S-2|IP_AHA-S-1|IP_AHA-CO-2|IP_AHA-CO-1|IP_AHA-C-3|IP_AHA-C-2|IP_AHA-C-1	0|1|14|0|2|4|0	21	7	0.05	0.00|0.00|0.44|0.00|0.00|0.00|0.00	8	0.0632	0.4425	0.8245
MTA	TTHERM_00149340	IP_AHA-S-2|IP_AHA-S-1|IP_AHA-CO-2|IP_AHA-CO-1|IP_AHA-C-3|IP_AHA-C-2|IP_AHA-C-1	0|7|4|0|12|3|0	26	7	0.07	0.00|0.00|0.00|0.00|0.44|0.00|0.00	8	0.0621	0.435	0.8247
MTA	TTHERM_00903870	IP_AHA-S-2|IP_AHA-S-1|IP_AHA-CO-2|IP_AHA-CO-1|IP_AHA-C-3|IP_AHA-C-2|IP_AHA-C-1	3|0|0|0|0|2|0	5	7	0.08	0.42|0.00|0.00|0.00|0.00|0.01|0.00	2	0.0618	0.42	0.8249
MTA	TTHERM_00794540	IP_AHA-S-2|IP_AHA-S-1|IP_AHA-CO-2|IP_AHA-CO-1|IP_AHA-C-3|IP_AHA-C-2|IP_AHA-C-1	0|1|7|0|1|0|0	9	7	0.04	0.00|0.00|0.43|0.00|0.00|0.00|0.00	4	0.0611	0.4275	0.8252
MTA	TTHERM_00284030	IP_AHA-S-2|IP_AHA-S-1|IP_AHA-CO-2|IP_AHA-CO-1|IP_AHA-C-3|IP_AHA-C-2|IP_AHA-C-1	0|6|6|0|4|0|0	16	7	0.07	0.00|0.38|0.04|0.00|0.00|0.00|0.00	4	0.0607	0.38	0.8254
MTA	TTHERM_00641240	IP_AHA-S-2|IP_AHA-S-1|IP_AHA-CO-2|IP_AHA-CO-1|IP_AHA-C-3|IP_AHA-C-2|IP_AHA-C-1	3|0|2|0|0|6|0	11	7	0.07	0.00|0.00|0.00|0.00|0.00|0.39|0.00	4	0.0561	0.3925	0.8256
MTA	TTHERM_00295120	IP_AHA-S-2|IP_AHA-S-1|IP_AHA-CO-2|IP_AHA-CO-1|IP_AHA-C-3|IP_AHA-C-2|IP_AHA-C-1	0|5|0|0|2|0|0	7	7	0.05	0.00|0.39|0.00|0.00|0.00|0.00|0.00	4	0.0554	0.3875	0.8259
MTA	TTHERM_00497940	IP_AHA-S-2|IP_AHA-S-1|IP_AHA-CO-2|IP_AHA-CO-1|IP_AHA-C-3|IP_AHA-C-2|IP_AHA-C-1	0|2|7|0|0|2|0	11	7	0.05	0.00|0.00|0.37|0.00|0.00|0.00|0.00	4	0.0525	0.3675	0.8261
MTA	TTHERM_00312320	IP_AHA-S-2|IP_AHA-S-1|IP_AHA-CO-2|IP_AHA-CO-1|IP_AHA-C-3|IP_AHA-C-2|IP_AHA-C-1	0|0|0|0|5|0|0	5	7	0.06	0.00|0.00|0.00|0.00|0.35|0.00|0.00	3	0.0507	0.355	0.8264
MTA	TTHERM_00971800	IP_AHA-S-2|IP_AHA-S-1|IP_AHA-CO-2|IP_AHA-CO-1|IP_AHA-C-3|IP_AHA-C-2|IP_AHA-C-1	0|0|14|0|0|2|0	16	7	0.06	0.00|0.00|0.35|0.00|0.00|0.00|0.00	8	0.0496	0.3475	0.8266
MTA	TTHERM_00794110	IP_AHA-S-2|IP_AHA-S-1|IP_AHA-CO-2|IP_AHA-CO-1|IP_AHA-C-3|IP_AHA-C-2|IP_AHA-C-1	2|0|3|0|0|3|0	8	7	0.05	0.06|0.00|0.10|0.00|0.00|0.17|0.00	2	0.0475	0.1675	0.8269
MTA	TTHERM_00189080	IP_AHA-S-2|IP_AHA-S-1|IP_AHA-CO-2|IP_AHA-CO-1|IP_AHA-C-3|IP_AHA-C-2|IP_AHA-C-1	0|8|1|0|3|2|0	14	7	0.04	0.00|0.33|0.00|0.00|0.00|0.00|0.00	6	0.0471	0.33	0.8271
MTA	TTHERM_00772030	IP_AHA-S-2|IP_AHA-S-1|IP_AHA-CO-2|IP_AHA-CO-1|IP_AHA-C-3|IP_AHA-C-2|IP_AHA-C-1	4|0|1|0|0|4|0	9	7	0.05	0.28|0.00|0.00|0.00|0.00|0.03|0.00	3	0.0454	0.285	0.8274
MTA	TTHERM_00600709	IP_AHA-S-2|IP_AHA-S-1|IP_AHA-CO-2|IP_AHA-CO-1|IP_AHA-C-3|IP_AHA-C-2|IP_AHA-C-1	0|1|4|0|2|0|0	7	7	0.04	0.00|0.00|0.26|0.00|0.02|0.00|0.00	2	0.0404	0.265	0.8276
MTA	TTHERM_00936610	IP_AHA-S-2|IP_AHA-S-1|IP_AHA-CO-2|IP_AHA-CO-1|IP_AHA-C-3|IP_AHA-C-2|IP_AHA-C-1	0|2|0|0|0|2|2	6	7	0.04	0.00|0.03|0.00|0.00|0.00|0.01|0.24	2	0.0396	0.2425	0.8279
MTA	TTHERM_01049320	IP_AHA-S-2|IP_AHA-S-1|IP_AHA-CO-2|IP_AHA-CO-1|IP_AHA-C-3|IP_AHA-C-2|IP_AHA-C-1	3|0|5|0|0|4|0	12	7	0.04	0.02|0.00|0.19|0.00|0.00|0.05|0.00	3	0.0371	0.1925	0.8282
MRC1	TTHERM_00571670	IP_MRC1-S-3|IP_MRC1-S-2|IP_MRC1-S-1|IP_MRC1-CO-2|IP_MRC1-CO-1|IP_MRC1-C-1	0|3|1|0|1|0	5	6	0	0.00|0.00|0.00|0.00|0.00|0.00	4	0.0004	0.0025	0.8283
MRC1	TTHERM_00048970	IP_MRC1-S-3|IP_MRC1-S-2|IP_MRC1-S-1|IP_MRC1-CO-2|IP_MRC1-CO-1|IP_MRC1-C-1	1|0|0|2|0|1	4	6	0	0.00|0.00|0.00|0.00|0.00|0.00	3	0.0004	0.0025	0.8283
MRC1	TTHERM_00444690	IP_MRC1-S-3|IP_MRC1-S-2|IP_MRC1-S-1|IP_MRC1-CO-2|IP_MRC1-CO-1|IP_MRC1-C-1	0|0|0|0|2|0	2	6	0	0.00|0.00|0.00|0.00|0.00|0.00	2	0.0004	0.0025	0.8283
MRC1	TTHERM_00716240	IP_MRC1-S-3|IP_MRC1-S-2|IP_MRC1-S-1|IP_MRC1-CO-2|IP_MRC1-CO-1|IP_MRC1-C-1	0|24|17|4|44|6	95	6	0	0.00|0.00|0.00|0.00|0.00|0.00	29	0.0004	0.0025	0.8283
MRC1	TTHERM_00016060	IP_MRC1-S-3|IP_MRC1-S-2|IP_MRC1-S-1|IP_MRC1-CO-2|IP_MRC1-CO-1|IP_MRC1-C-1	0|2|0|1|4|3	10	6	0	0.00|0.00|0.00|0.00|0.00|0.00	5	0.0004	0.0025	0.8283
MRC1	TTHERM_00722920	IP_MRC1-S-3|IP_MRC1-S-2|IP_MRC1-S-1|IP_MRC1-CO-2|IP_MRC1-CO-1|IP_MRC1-C-1	2|0|1|0|0|0	3	6	0	0.00|0.00|0.00|0.00|0.00|0.00	3	0.0004	0.0025	0.8283
MRC1	TTHERM_01347920	IP_MRC1-S-3|IP_MRC1-S-2|IP_MRC1-S-1|IP_MRC1-CO-2|IP_MRC1-CO-1|IP_MRC1-C-1	0|5|2|0|5|0	12	6	0	0.00|0.00|0.00|0.00|0.00|0.00	5	0.0004	0.0025	0.8283
MRC1	TTHERM_01276410	IP_MRC1-S-3|IP_MRC1-S-2|IP_MRC1-S-1|IP_MRC1-CO-2|IP_MRC1-CO-1|IP_MRC1-C-1	0|3|0|1|2|0	6	6	0	0.00|0.00|0.00|0.00|0.00|0.00	3	0.0004	0.0025	0.8283
MRC1	TTHERM_00028510	IP_MRC1-S-3|IP_MRC1-S-2|IP_MRC1-S-1|IP_MRC1-CO-2|IP_MRC1-CO-1|IP_MRC1-C-1	0|2|0|0|1|0	3	6	0	0.00|0.00|0.00|0.00|0.00|0.00	2	0.0004	0.0025	0.8283
MRC1	TTHERM_00794150	IP_MRC1-S-3|IP_MRC1-S-2|IP_MRC1-S-1|IP_MRC1-CO-2|IP_MRC1-CO-1|IP_MRC1-C-1	0|3|0|0|2|0	5	6	0	0.00|0.00|0.00|0.00|0.00|0.00	3	0.0004	0.0025	0.8283
MRC1	TTHERM_00078920	IP_MRC1-S-3|IP_MRC1-S-2|IP_MRC1-S-1|IP_MRC1-CO-2|IP_MRC1-CO-1|IP_MRC1-C-1	0|0|0|0|0|2	2	6	0	0.00|0.00|0.00|0.00|0.00|0.00	3	0.0004	0.0025	0.8283
MRC1	TTHERM_00335640	IP_MRC1-S-3|IP_MRC1-S-2|IP_MRC1-S-1|IP_MRC1-CO-2|IP_MRC1-CO-1|IP_MRC1-C-1	0|1|0|3|1|10	15	6	0	0.00|0.00|0.00|0.00|0.00|0.00	9	0.0004	0.0025	0.8283
MRC1	TTHERM_00773690	IP_MRC1-S-3|IP_MRC1-S-2|IP_MRC1-S-1|IP_MRC1-CO-2|IP_MRC1-CO-1|IP_MRC1-C-1	0|9|4|0|6|1	20	6	0	0.00|0.00|0.00|0.00|0.00|0.00	8	0.0004	0.0025	0.8283
MRC1	TTHERM_00075670	IP_MRC1-S-3|IP_MRC1-S-2|IP_MRC1-S-1|IP_MRC1-CO-2|IP_MRC1-CO-1|IP_MRC1-C-1	0|8|6|4|10|3	31	6	0	0.00|0.00|0.00|0.00|0.00|0.00	8	0.0004	0.0025	0.8283
MRC1	TTHERM_01129660	IP_MRC1-S-3|IP_MRC1-S-2|IP_MRC1-S-1|IP_MRC1-CO-2|IP_MRC1-CO-1|IP_MRC1-C-1	0|6|3|0|9|1	19	6	0	0.00|0.00|0.00|0.00|0.00|0.00	7	0.0004	0.0025	0.8283
MRC1	TTHERM_00659131	IP_MRC1-S-3|IP_MRC1-S-2|IP_MRC1-S-1|IP_MRC1-CO-2|IP_MRC1-CO-1|IP_MRC1-C-1	0|0|0|3|0|0	3	6	0	0.00|0.00|0.00|0.00|0.00|0.00	3	0.0004	0.0025	0.8283
MTA	TTHERM_00219370	IP_AHA-S-2|IP_AHA-S-1|IP_AHA-CO-2|IP_AHA-CO-1|IP_AHA-C-3|IP_AHA-C-2|IP_AHA-C-1	0|4|0|1|4|1|0	10	7	0.04	0.00|0.15|0.00|0.00|0.08|0.00|0.00	3	0.0329	0.15	0.8285
MTA	TTHERM_00850570	IP_AHA-S-2|IP_AHA-S-1|IP_AHA-CO-2|IP_AHA-CO-1|IP_AHA-C-3|IP_AHA-C-2|IP_AHA-C-1	0|4|3|0|0|0|0	7	7	0.04	0.00|0.22|0.00|0.00|0.00|0.00|0.00	3	0.0318	0.2175	0.8287
MTA	TTHERM_01149330	IP_AHA-S-2|IP_AHA-S-1|IP_AHA-CO-2|IP_AHA-CO-1|IP_AHA-C-3|IP_AHA-C-2|IP_AHA-C-1	0|2|0|0|0|0|2	4	7	0.02	0.00|0.03|0.00|0.00|0.00|0.00|0.19	2	0.0318	0.195	0.829
MTA	TTHERM_00243960	IP_AHA-S-2|IP_AHA-S-1|IP_AHA-CO-2|IP_AHA-CO-1|IP_AHA-C-3|IP_AHA-C-2|IP_AHA-C-1	0|0|0|0|3|0|0	3	7	0.05	0.00|0.00|0.00|0.00|0.22|0.00|0.00	2	0.0314	0.22	0.8293
MTA	TTHERM_00375010	IP_AHA-S-2|IP_AHA-S-1|IP_AHA-CO-2|IP_AHA-CO-1|IP_AHA-C-3|IP_AHA-C-2|IP_AHA-C-1	0|4|0|0|4|0|0	8	7	0.03	0.00|0.13|0.00|0.00|0.08|0.00|0.00	3	0.03	0.1275	0.8296
MTA	TTHERM_00408840	IP_AHA-S-2|IP_AHA-S-1|IP_AHA-CO-2|IP_AHA-CO-1|IP_AHA-C-3|IP_AHA-C-2|IP_AHA-C-1	0|1|3|0|2|3|0	9	7	0.04	0.00|0.00|0.07|0.00|0.02|0.11|0.00	2	0.0296	0.115	0.8298
MTA	TTHERM_00444220	IP_AHA-S-2|IP_AHA-S-1|IP_AHA-CO-2|IP_AHA-CO-1|IP_AHA-C-3|IP_AHA-C-2|IP_AHA-C-1	2|0|8|0|0|3|0	13	7	0.02	0.00|0.00|0.20|0.00|0.00|0.00|0.00	5	0.0293	0.205	0.8304
MTA	TTHERM_000481318	IP_AHA-S-2|IP_AHA-S-1|IP_AHA-CO-2|IP_AHA-CO-1|IP_AHA-C-3|IP_AHA-C-2|IP_AHA-C-1	1|0|0|0|0|3|0	4	7	0.03	0.02|0.00|0.00|0.00|0.00|0.19|0.00	2	0.0293	0.1875	0.8304
MTA	TTHERM_00266390	IP_AHA-S-2|IP_AHA-S-1|IP_AHA-CO-2|IP_AHA-CO-1|IP_AHA-C-3|IP_AHA-C-2|IP_AHA-C-1	1|1|11|0|1|9|0	23	7	0.02	0.00|0.00|0.19|0.00|0.00|0.01|0.00	7	0.0286	0.1925	0.8307
MTA	TTHERM_00470990	IP_AHA-S-2|IP_AHA-S-1|IP_AHA-CO-2|IP_AHA-CO-1|IP_AHA-C-3|IP_AHA-C-2|IP_AHA-C-1	5|0|0|1|8|0|0	14	7	0.02	0.00|0.00|0.00|0.00|0.19|0.00|0.00	6	0.0264	0.185	0.8312
MTA	TTHERM_00943010	IP_AHA-S-2|IP_AHA-S-1|IP_AHA-CO-2|IP_AHA-CO-1|IP_AHA-C-3|IP_AHA-C-2|IP_AHA-C-1	0|1|13|0|0|7|0	21	7	0.03	0.00|0.00|0.19|0.00|0.00|0.00|0.00	8	0.0264	0.185	0.8312
MTA	TTHERM_01084110	IP_AHA-S-2|IP_AHA-S-1|IP_AHA-CO-2|IP_AHA-CO-1|IP_AHA-C-3|IP_AHA-C-2|IP_AHA-C-1	0|1|3|0|3|2|0	9	7	0.03	0.00|0.00|0.07|0.00|0.09|0.02|0.00	2	0.0261	0.0875	0.8315
MTA	TTHERM_00221140	IP_AHA-S-2|IP_AHA-S-1|IP_AHA-CO-2|IP_AHA-CO-1|IP_AHA-C-3|IP_AHA-C-2|IP_AHA-C-1	0|9|2|0|15|0|0	26	7	0.02	0.00|0.00|0.00|0.00|0.18|0.00|0.00	10	0.0257	0.18	0.8318
MTA	TTHERM_00133690	IP_AHA-S-2|IP_AHA-S-1|IP_AHA-CO-2|IP_AHA-CO-1|IP_AHA-C-3|IP_AHA-C-2|IP_AHA-C-1	0|4|1|0|4|0|0	9	7	0.03	0.00|0.12|0.00|0.00|0.05|0.00|0.00	3	0.025	0.1225	0.8321
MTA	TTHERM_00456800	IP_AHA-S-2|IP_AHA-S-1|IP_AHA-CO-2|IP_AHA-CO-1|IP_AHA-C-3|IP_AHA-C-2|IP_AHA-C-1	2|1|8|0|0|4|0	15	7	0.02	0.00|0.00|0.17|0.00|0.00|0.00|0.00	5	0.0239	0.1675	0.8323
MTA	TTHERM_00147640	IP_AHA-S-2|IP_AHA-S-1|IP_AHA-CO-2|IP_AHA-CO-1|IP_AHA-C-3|IP_AHA-C-2|IP_AHA-C-1	0|4|2|0|2|0|0	8	7	0.04	0.00|0.16|0.00|0.00|0.00|0.00|0.00	3	0.0236	0.165	0.8329
MTA	TTHERM_00853120	IP_AHA-S-2|IP_AHA-S-1|IP_AHA-CO-2|IP_AHA-CO-1|IP_AHA-C-3|IP_AHA-C-2|IP_AHA-C-1	1|0|3|0|0|3|0	7	7	0.01	0.00|0.00|0.06|0.00|0.00|0.10|0.00	2	0.0236	0.105	0.8329
MTA	TTHERM_00780960	IP_AHA-S-2|IP_AHA-S-1|IP_AHA-CO-2|IP_AHA-CO-1|IP_AHA-C-3|IP_AHA-C-2|IP_AHA-C-1	0|2|12|0|0|7|0	21	7	0.02	0.00|0.00|0.16|0.00|0.00|0.00|0.00	8	0.0232	0.1625	0.8332
MTA	TTHERM_00794530	IP_AHA-S-2|IP_AHA-S-1|IP_AHA-CO-2|IP_AHA-CO-1|IP_AHA-C-3|IP_AHA-C-2|IP_AHA-C-1	0|0|0|0|0|3|0	3	7	0.04	0.00|0.00|0.00|0.00|0.00|0.16|0.00	2	0.0221	0.155	0.8337
MTA	TTHERM_00633150	IP_AHA-S-2|IP_AHA-S-1|IP_AHA-CO-2|IP_AHA-CO-1|IP_AHA-C-3|IP_AHA-C-2|IP_AHA-C-1	2|1|3|0|0|2|0	8	7	0.02	0.05|0.00|0.08|0.00|0.00|0.02|0.00	2	0.0221	0.08	0.8337
MTA	TTHERM_01020880	IP_AHA-S-2|IP_AHA-S-1|IP_AHA-CO-2|IP_AHA-CO-1|IP_AHA-C-3|IP_AHA-C-2|IP_AHA-C-1	0|1|6|0|5|0|0	12	7	0.01	0.00|0.00|0.10|0.00|0.05|0.00|0.00	4	0.0218	0.105	0.834
MTA	TTHERM_00770690	IP_AHA-S-2|IP_AHA-S-1|IP_AHA-CO-2|IP_AHA-CO-1|IP_AHA-C-3|IP_AHA-C-2|IP_AHA-C-1	1|0|11|0|0|7|0	19	7	0.03	0.00|0.00|0.14|0.00|0.00|0.00|0.00	7	0.0204	0.1425	0.8346
MTA	TTHERM_00938750	IP_AHA-S-2|IP_AHA-S-1|IP_AHA-CO-2|IP_AHA-CO-1|IP_AHA-C-3|IP_AHA-C-2|IP_AHA-C-1	1|2|3|0|0|2|0	8	7	0.02	0.00|0.04|0.08|0.00|0.00|0.01|0.00	2	0.0204	0.0825	0.8346
MTA	TTHERM_00103890	IP_AHA-S-2|IP_AHA-S-1|IP_AHA-CO-2|IP_AHA-CO-1|IP_AHA-C-3|IP_AHA-C-2|IP_AHA-C-1	1|0|1|0|0|3|0	5	7	0.02	0.00|0.00|0.00|0.00|0.00|0.13|0.00	2	0.0196	0.135	0.8348
MTA	TTHERM_00691890	IP_AHA-S-2|IP_AHA-S-1|IP_AHA-CO-2|IP_AHA-CO-1|IP_AHA-C-3|IP_AHA-C-2|IP_AHA-C-1	0|8|3|0|3|0|0	14	7	0.03	0.00|0.13|0.00|0.00|0.00|0.00|0.00	6	0.0193	0.135	0.8351
MTA	TTHERM_00260690	IP_AHA-S-2|IP_AHA-S-1|IP_AHA-CO-2|IP_AHA-CO-1|IP_AHA-C-3|IP_AHA-C-2|IP_AHA-C-1	0|0|2|0|0|3|0	5	7	0.02	0.00|0.00|0.02|0.00|0.00|0.11|0.00	2	0.0189	0.115	0.8354
MTA	TTHERM_00426240	IP_AHA-S-2|IP_AHA-S-1|IP_AHA-CO-2|IP_AHA-CO-1|IP_AHA-C-3|IP_AHA-C-2|IP_AHA-C-1	0|0|0|0|0|3|0	3	7	0.02	0.00|0.00|0.00|0.00|0.00|0.12|0.00	2	0.0168	0.1175	0.8357
MTA	TTHERM_00558550	IP_AHA-S-2|IP_AHA-S-1|IP_AHA-CO-2|IP_AHA-CO-1|IP_AHA-C-3|IP_AHA-C-2|IP_AHA-C-1	0|0|5|0|0|1|0	6	7	0.02	0.00|0.00|0.10|0.00|0.00|0.00|0.00	3	0.015	0.105	0.836
MTA	TTHERM_00484731	IP_AHA-S-2|IP_AHA-S-1|IP_AHA-CO-2|IP_AHA-CO-1|IP_AHA-C-3|IP_AHA-C-2|IP_AHA-C-1	0|4|2|0|0|0|0	6	7	0.02	0.00|0.10|0.00|0.00|0.00|0.00|0.00	3	0.0139	0.0975	0.8362
MTA	TTHERM_00355660	IP_AHA-S-2|IP_AHA-S-1|IP_AHA-CO-2|IP_AHA-CO-1|IP_AHA-C-3|IP_AHA-C-2|IP_AHA-C-1	1|0|0|0|0|3|0	4	7	0.02	0.00|0.00|0.00|0.00|0.00|0.09|0.00	2	0.0136	0.095	0.8365
MTA	TTHERM_00295700	IP_AHA-S-2|IP_AHA-S-1|IP_AHA-CO-2|IP_AHA-CO-1|IP_AHA-C-3|IP_AHA-C-2|IP_AHA-C-1	0|6|2|0|2|2|0	12	7	0.01	0.00|0.09|0.00|0.00|0.00|0.00|0.00	5	0.0129	0.09	0.8371
MTA	TTHERM_00550700	IP_AHA-S-2|IP_AHA-S-1|IP_AHA-CO-2|IP_AHA-CO-1|IP_AHA-C-3|IP_AHA-C-2|IP_AHA-C-1	0|5|0|0|5|0|0	10	7	0.01	0.00|0.07|0.00|0.00|0.02|0.00|0.00	4	0.0129	0.0675	0.8371
MTA	TTHERM_01076920	IP_AHA-S-2|IP_AHA-S-1|IP_AHA-CO-2|IP_AHA-CO-1|IP_AHA-C-3|IP_AHA-C-2|IP_AHA-C-1	0|0|3|0|0|0|0	3	7	0.01	0.00|0.00|0.09|0.00|0.00|0.00|0.00	2	0.0125	0.0875	0.8377
MTA	TTHERM_000339809	IP_AHA-S-2|IP_AHA-S-1|IP_AHA-CO-2|IP_AHA-CO-1|IP_AHA-C-3|IP_AHA-C-2|IP_AHA-C-1	1|4|22|0|4|7|0	38	7	0.02	0.00|0.00|0.09|0.00|0.00|0.00|0.00	15	0.0125	0.0875	0.8377
MTA	TTHERM_00706330	IP_AHA-S-2|IP_AHA-S-1|IP_AHA-CO-2|IP_AHA-CO-1|IP_AHA-C-3|IP_AHA-C-2|IP_AHA-C-1	0|2|2|0|1|0|0	5	7	0.01	0.00|0.05|0.02|0.00|0.01|0.00|0.00	2	0.0121	0.055	0.8379
MTA	TTHERM_00122290	IP_AHA-S-2|IP_AHA-S-1|IP_AHA-CO-2|IP_AHA-CO-1|IP_AHA-C-3|IP_AHA-C-2|IP_AHA-C-1	0|8|2|0|12|1|0	23	7	0.01	0.00|0.00|0.00|0.00|0.08|0.00|0.00	9	0.0118	0.0825	0.8385
MTA	TTHERM_00812780	IP_AHA-S-2|IP_AHA-S-1|IP_AHA-CO-2|IP_AHA-CO-1|IP_AHA-C-3|IP_AHA-C-2|IP_AHA-C-1	0|0|6|0|0|2|0	8	7	0	0.00|0.00|0.08|0.00|0.00|0.00|0.00	4	0.0118	0.0825	0.8385
MTA	TTHERM_00535560	IP_AHA-S-2|IP_AHA-S-1|IP_AHA-CO-2|IP_AHA-CO-1|IP_AHA-C-3|IP_AHA-C-2|IP_AHA-C-1	0|2|0|0|0|0|0	2	7	0.01	0.00|0.08|0.00|0.00|0.00|0.00|0.00	2	0.0111	0.0775	0.8388
MTA	TTHERM_00013070	IP_AHA-S-2|IP_AHA-S-1|IP_AHA-CO-2|IP_AHA-CO-1|IP_AHA-C-3|IP_AHA-C-2|IP_AHA-C-1	0|0|25|0|3|2|0	30	7	0.02	0.00|0.00|0.07|0.00|0.00|0.00|0.00	15	0.0107	0.075	0.8393
MTA	TTHERM_00686150	IP_AHA-S-2|IP_AHA-S-1|IP_AHA-CO-2|IP_AHA-CO-1|IP_AHA-C-3|IP_AHA-C-2|IP_AHA-C-1	0|1|3|0|1|1|0	6	7	0.02	0.00|0.00|0.07|0.00|0.00|0.00|0.00	2	0.0107	0.07	0.8393
MTA	TTHERM_00221020	IP_AHA-S-2|IP_AHA-S-1|IP_AHA-CO-2|IP_AHA-CO-1|IP_AHA-C-3|IP_AHA-C-2|IP_AHA-C-1	0|0|1|0|4|0|0	5	7	0.01	0.00|0.00|0.00|0.00|0.07|0.00|0.00	3	0.0104	0.0725	0.8396
MTA	TTHERM_00023980	IP_AHA-S-2|IP_AHA-S-1|IP_AHA-CO-2|IP_AHA-CO-1|IP_AHA-C-3|IP_AHA-C-2|IP_AHA-C-1	0|2|3|0|1|1|0	7	7	0.01	0.00|0.02|0.04|0.00|0.00|0.00|0.00	2	0.0096	0.045	0.8399
MTA	TTHERM_00773690	IP_AHA-S-2|IP_AHA-S-1|IP_AHA-CO-2|IP_AHA-CO-1|IP_AHA-C-3|IP_AHA-C-2|IP_AHA-C-1	0|1|1|0|0|11|1	14	7	0.01	0.00|0.00|0.00|0.00|0.00|0.06|0.00	8	0.0093	0.065	0.8404
MTA	TTHERM_01194830	IP_AHA-S-2|IP_AHA-S-1|IP_AHA-CO-2|IP_AHA-CO-1|IP_AHA-C-3|IP_AHA-C-2|IP_AHA-C-1	3|2|14|0|1|9|0	29	7	0.01	0.00|0.00|0.06|0.00|0.00|0.00|0.00	9	0.0093	0.065	0.8404
MTA	TTHERM_00220750	IP_AHA-S-2|IP_AHA-S-1|IP_AHA-CO-2|IP_AHA-CO-1|IP_AHA-C-3|IP_AHA-C-2|IP_AHA-C-1	0|1|3|0|1|0|0	5	7	0.01	0.00|0.00|0.06|0.00|0.00|0.00|0.00	2	0.0089	0.0625	0.841
MTA	TTHERM_00016060	IP_AHA-S-2|IP_AHA-S-1|IP_AHA-CO-2|IP_AHA-CO-1|IP_AHA-C-3|IP_AHA-C-2|IP_AHA-C-1	2|1|7|0|0|3|0	13	7	0.01	0.00|0.00|0.06|0.00|0.00|0.00|0.00	5	0.0089	0.0625	0.841
MTA	TTHERM_01207690	IP_AHA-S-2|IP_AHA-S-1|IP_AHA-CO-2|IP_AHA-CO-1|IP_AHA-C-3|IP_AHA-C-2|IP_AHA-C-1	0|0|0|0|13|2|0	15	7	0	0.00|0.00|0.00|0.00|0.06|0.00|0.00	10	0.0086	0.06	0.8413
MTA	TTHERM_000691779	IP_AHA-S-2|IP_AHA-S-1|IP_AHA-CO-2|IP_AHA-CO-1|IP_AHA-C-3|IP_AHA-C-2|IP_AHA-C-1	3|0|7|0|0|4|0	14	7	0	0.00|0.00|0.04|0.00|0.00|0.00|0.00	5	0.0064	0.045	0.8415
MTA	TTHERM_00715730	IP_AHA-S-2|IP_AHA-S-1|IP_AHA-CO-2|IP_AHA-CO-1|IP_AHA-C-3|IP_AHA-C-2|IP_AHA-C-1	0|6|4|0|13|3|0	26	7	0	0.00|0.00|0.00|0.00|0.04|0.00|0.00	10	0.0061	0.0425	0.8418
MTA	TTHERM_00713350	IP_AHA-S-2|IP_AHA-S-1|IP_AHA-CO-2|IP_AHA-CO-1|IP_AHA-C-3|IP_AHA-C-2|IP_AHA-C-1	2|0|1|0|0|2|0	5	7	0.01	0.02|0.00|0.00|0.00|0.00|0.02|0.00	2	0.0061	0.0225	0.8421
MTA	TTHERM_00384800	IP_AHA-S-2|IP_AHA-S-1|IP_AHA-CO-2|IP_AHA-CO-1|IP_AHA-C-3|IP_AHA-C-2|IP_AHA-C-1	0|2|2|0|0|0|0	4	7	0	0.00|0.03|0.01|0.00|0.00|0.00|0.00	2	0.0057	0.0275	0.8424
MTA	TTHERM_00220600	IP_AHA-S-2|IP_AHA-S-1|IP_AHA-CO-2|IP_AHA-CO-1|IP_AHA-C-3|IP_AHA-C-2|IP_AHA-C-1	0|0|4|0|0|1|0	5	7	0	0.00|0.00|0.04|0.00|0.00|0.00|0.00	3	0.005	0.035	0.8435
MTA	TTHERM_00106890	IP_AHA-S-2|IP_AHA-S-1|IP_AHA-CO-2|IP_AHA-CO-1|IP_AHA-C-3|IP_AHA-C-2|IP_AHA-C-1	0|3|12|0|11|0|0	26	7	0	0.00|0.00|0.01|0.00|0.03|0.00|0.00	9	0.005	0.0275	0.8435
MTA	TTHERM_00859260	IP_AHA-S-2|IP_AHA-S-1|IP_AHA-CO-2|IP_AHA-CO-1|IP_AHA-C-3|IP_AHA-C-2|IP_AHA-C-1	1|2|8|0|2|7|0	20	7	0	0.00|0.00|0.02|0.00|0.00|0.01|0.00	6	0.005	0.0225	0.8435
MTA	TTHERM_00302100	IP_AHA-S-2|IP_AHA-S-1|IP_AHA-CO-2|IP_AHA-CO-1|IP_AHA-C-3|IP_AHA-C-2|IP_AHA-C-1	0|2|0|0|0|2|0	4	7	0.01	0.00|0.02|0.00|0.00|0.00|0.01|0.00	2	0.005	0.0225	0.8435
MTA	TTHERM_00434000	IP_AHA-S-2|IP_AHA-S-1|IP_AHA-CO-2|IP_AHA-CO-1|IP_AHA-C-3|IP_AHA-C-2|IP_AHA-C-1	2|0|0|0|0|0|0	2	7	0	0.03|0.00|0.00|0.00|0.00|0.00|0.00	2	0.0046	0.0325	0.8437
MTA	TTHERM_00659070	IP_AHA-S-2|IP_AHA-S-1|IP_AHA-CO-2|IP_AHA-CO-1|IP_AHA-C-3|IP_AHA-C-2|IP_AHA-C-1	0|0|2|0|0|2|0	4	7	0.01	0.00|0.00|0.01|0.00|0.00|0.02|0.00	2	0.0043	0.0225	0.844
MTA	TTHERM_000499375	IP_AHA-S-2|IP_AHA-S-1|IP_AHA-CO-2|IP_AHA-CO-1|IP_AHA-C-3|IP_AHA-C-2|IP_AHA-C-1	0|1|4|0|1|0|0	6	7	0	0.00|0.00|0.03|0.00|0.00|0.00|0.00	3	0.0039	0.0275	0.8446
MTA	TTHERM_00101330	IP_AHA-S-2|IP_AHA-S-1|IP_AHA-CO-2|IP_AHA-CO-1|IP_AHA-C-3|IP_AHA-C-2|IP_AHA-C-1	0|0|1|0|1|2|0	4	7	0	0.00|0.00|0.00|0.00|0.00|0.02|0.00	2	0.0039	0.02	0.8446
MTA	TTHERM_00509080	IP_AHA-S-2|IP_AHA-S-1|IP_AHA-CO-2|IP_AHA-CO-1|IP_AHA-C-3|IP_AHA-C-2|IP_AHA-C-1	0|1|2|0|0|1|0	4	7	0	0.00|0.00|0.02|0.00|0.00|0.00|0.00	2	0.0036	0.0175	0.8448
MTA	TTHERM_00649280	IP_AHA-S-2|IP_AHA-S-1|IP_AHA-CO-2|IP_AHA-CO-1|IP_AHA-C-3|IP_AHA-C-2|IP_AHA-C-1	0|1|2|0|0|0|0	3	7	0	0.00|0.00|0.02|0.00|0.00|0.00|0.00	2	0.0032	0.02	0.8454
MTA	TTHERM_01287980	IP_AHA-S-2|IP_AHA-S-1|IP_AHA-CO-2|IP_AHA-CO-1|IP_AHA-C-3|IP_AHA-C-2|IP_AHA-C-1	0|0|2|0|0|2|0	4	7	0	0.00|0.00|0.02|0.00|0.00|0.00|0.00	2	0.0032	0.0175	0.8454
MTA	TTHERM_00052510	IP_AHA-S-2|IP_AHA-S-1|IP_AHA-CO-2|IP_AHA-CO-1|IP_AHA-C-3|IP_AHA-C-2|IP_AHA-C-1	1|0|11|0|0|4|0	16	7	0	0.00|0.00|0.02|0.00|0.00|0.00|0.00	8	0.0032	0.0225	0.8456
MTA	TTHERM_00649410	IP_AHA-S-2|IP_AHA-S-1|IP_AHA-CO-2|IP_AHA-CO-1|IP_AHA-C-3|IP_AHA-C-2|IP_AHA-C-1	0|0|4|0|0|1|0	5	7	0	0.00|0.00|0.02|0.00|0.00|0.00|0.00	3	0.0029	0.02	0.8459
MTA	TTHERM_00979780	IP_AHA-S-2|IP_AHA-S-1|IP_AHA-CO-2|IP_AHA-CO-1|IP_AHA-C-3|IP_AHA-C-2|IP_AHA-C-1	0|0|1|0|0|2|0	3	7	0.01	0.00|0.00|0.01|0.00|0.00|0.01|0.00	2	0.0029	0.0125	0.8462
MTA	TTHERM_00133510	IP_AHA-S-2|IP_AHA-S-1|IP_AHA-CO-2|IP_AHA-CO-1|IP_AHA-C-3|IP_AHA-C-2|IP_AHA-C-1	0|2|0|0|0|0|0	2	7	0	0.00|0.02|0.00|0.00|0.00|0.00|0.00	2	0.0025	0.0175	0.8472
MTA	TTHERM_00473020	IP_AHA-S-2|IP_AHA-S-1|IP_AHA-CO-2|IP_AHA-CO-1|IP_AHA-C-3|IP_AHA-C-2|IP_AHA-C-1	0|0|0|0|0|2|0	2	7	0	0.00|0.00|0.00|0.00|0.00|0.02|0.00	2	0.0025	0.0175	0.8472
MTA	TTHERM_001001223	IP_AHA-S-2|IP_AHA-S-1|IP_AHA-CO-2|IP_AHA-CO-1|IP_AHA-C-3|IP_AHA-C-2|IP_AHA-C-1	0|0|0|0|0|2|0	2	7	0	0.00|0.00|0.00|0.00|0.00|0.02|0.00	2	0.0025	0.0175	0.8472
MTA	TTHERM_000133669	IP_AHA-S-2|IP_AHA-S-1|IP_AHA-CO-2|IP_AHA-CO-1|IP_AHA-C-3|IP_AHA-C-2|IP_AHA-C-1	0|1|1|1|0|2|0	5	7	0	0.00|0.00|0.00|0.00|0.00|0.01|0.00	2	0.0025	0.0125	0.8472
MTA	TTHERM_01141570	IP_AHA-S-2|IP_AHA-S-1|IP_AHA-CO-2|IP_AHA-CO-1|IP_AHA-C-3|IP_AHA-C-2|IP_AHA-C-1	4|2|1|1|2|1|0	11	7	0	0.01|0.00|0.00|0.00|0.00|0.00|0.00	4	0.0021	0.015	0.8483
MTA	TTHERM_00787250	IP_AHA-S-2|IP_AHA-S-1|IP_AHA-CO-2|IP_AHA-CO-1|IP_AHA-C-3|IP_AHA-C-2|IP_AHA-C-1	5|3|5|0|0|3|0	16	7	0	0.01|0.00|0.00|0.00|0.00|0.00|0.00	5	0.0021	0.015	0.8483
MTA	TTHERM_00444800	IP_AHA-S-2|IP_AHA-S-1|IP_AHA-CO-2|IP_AHA-CO-1|IP_AHA-C-3|IP_AHA-C-2|IP_AHA-C-1	0|0|0|0|0|2|0	2	7	0	0.00|0.00|0.00|0.00|0.00|0.01|0.00	2	0.0021	0.015	0.8483
MTA	TTHERM_00865270	IP_AHA-S-2|IP_AHA-S-1|IP_AHA-CO-2|IP_AHA-CO-1|IP_AHA-C-3|IP_AHA-C-2|IP_AHA-C-1	0|0|1|0|2|0|0	3	7	0	0.00|0.00|0.00|0.00|0.01|0.00|0.00	2	0.0021	0.01	0.8483
MTA	TTHERM_00131180	IP_AHA-S-2|IP_AHA-S-1|IP_AHA-CO-2|IP_AHA-CO-1|IP_AHA-C-3|IP_AHA-C-2|IP_AHA-C-1	0|0|0|0|2|0|0	2	7	0	0.00|0.00|0.00|0.00|0.01|0.00|0.00	2	0.0018	0.0125	0.8496
MTA	TTHERM_00013790	IP_AHA-S-2|IP_AHA-S-1|IP_AHA-CO-2|IP_AHA-CO-1|IP_AHA-C-3|IP_AHA-C-2|IP_AHA-C-1	0|0|0|0|2|0|0	2	7	0	0.00|0.00|0.00|0.00|0.01|0.00|0.00	2	0.0018	0.0125	0.8496
MTA	TTHERM_00069210	IP_AHA-S-2|IP_AHA-S-1|IP_AHA-CO-2|IP_AHA-CO-1|IP_AHA-C-3|IP_AHA-C-2|IP_AHA-C-1	1|0|1|0|0|3|0	5	7	0	0.00|0.00|0.00|0.00|0.00|0.01|0.00	3	0.0018	0.0125	0.8496
MTA	TTHERM_00474970	IP_AHA-S-2|IP_AHA-S-1|IP_AHA-CO-2|IP_AHA-CO-1|IP_AHA-C-3|IP_AHA-C-2|IP_AHA-C-1	1|3|22|0|0|8|0	34	7	0	0.00|0.00|0.01|0.00|0.00|0.00|0.00	15	0.0018	0.0125	0.8496
MTA	TTHERM_00577030	IP_AHA-S-2|IP_AHA-S-1|IP_AHA-CO-2|IP_AHA-CO-1|IP_AHA-C-3|IP_AHA-C-2|IP_AHA-C-1	0|0|0|0|2|0|0	2	7	0	0.00|0.00|0.00|0.00|0.01|0.00|0.00	2	0.0018	0.0125	0.8496
MTA	TTHERM_000338239	IP_AHA-S-2|IP_AHA-S-1|IP_AHA-CO-2|IP_AHA-CO-1|IP_AHA-C-3|IP_AHA-C-2|IP_AHA-C-1	1|3|22|0|1|6|1	34	7	0	0.00|0.00|0.01|0.00|0.00|0.00|0.00	15	0.0014	0.01	0.8506
MTA	TTHERM_00022810	IP_AHA-S-2|IP_AHA-S-1|IP_AHA-CO-2|IP_AHA-CO-1|IP_AHA-C-3|IP_AHA-C-2|IP_AHA-C-1	3|2|7|0|0|10|0	22	7	0	0.00|0.00|0.00|0.00|0.00|0.01|0.00	8	0.0014	0.01	0.8506
MTA	TTHERM_00723390	IP_AHA-S-2|IP_AHA-S-1|IP_AHA-CO-2|IP_AHA-CO-1|IP_AHA-C-3|IP_AHA-C-2|IP_AHA-C-1	1|4|12|0|2|5|0	24	7	0	0.00|0.00|0.01|0.00|0.00|0.00|0.00	9	0.0014	0.01	0.8506
MTA	TTHERM_00056140	IP_AHA-S-2|IP_AHA-S-1|IP_AHA-CO-2|IP_AHA-CO-1|IP_AHA-C-3|IP_AHA-C-2|IP_AHA-C-1	0|3|0|0|3|3|0	9	7	0	0.00|0.00|0.00|0.00|0.00|0.00|0.00	3	0.0014	0.005	0.8506
MTA	TTHERM_00420790	IP_AHA-S-2|IP_AHA-S-1|IP_AHA-CO-2|IP_AHA-CO-1|IP_AHA-C-3|IP_AHA-C-2|IP_AHA-C-1	0|4|4|0|5|2|0	15	7	0	0.00|0.00|0.00|0.00|0.01|0.00|0.00	5	0.0011	0.0075	0.8521
MTA	TTHERM_00491130	IP_AHA-S-2|IP_AHA-S-1|IP_AHA-CO-2|IP_AHA-CO-1|IP_AHA-C-3|IP_AHA-C-2|IP_AHA-C-1	4|1|0|0|0|1|0	6	7	0	0.01|0.00|0.00|0.00|0.00|0.00|0.00	4	0.0011	0.0075	0.8521
MTA	TTHERM_00046640	IP_AHA-S-2|IP_AHA-S-1|IP_AHA-CO-2|IP_AHA-CO-1|IP_AHA-C-3|IP_AHA-C-2|IP_AHA-C-1	0|0|2|0|3|0|0	5	7	0	0.00|0.00|0.00|0.00|0.01|0.00|0.00	3	0.0011	0.0075	0.8521
MTA	TTHERM_00334590	IP_AHA-S-2|IP_AHA-S-1|IP_AHA-CO-2|IP_AHA-CO-1|IP_AHA-C-3|IP_AHA-C-2|IP_AHA-C-1	0|5|1|0|2|2|1	11	7	0	0.00|0.01|0.00|0.00|0.00|0.00|0.00	5	0.0011	0.0075	0.8521
MTA	TTHERM_00151990	IP_AHA-S-2|IP_AHA-S-1|IP_AHA-CO-2|IP_AHA-CO-1|IP_AHA-C-3|IP_AHA-C-2|IP_AHA-C-1	0|0|2|0|0|1|0	3	7	0	0.00|0.00|0.01|0.00|0.00|0.00|0.00	2	0.0011	0.0075	0.8521
MTA	TTHERM_00630500	IP_AHA-S-2|IP_AHA-S-1|IP_AHA-CO-2|IP_AHA-CO-1|IP_AHA-C-3|IP_AHA-C-2|IP_AHA-C-1	0|2|1|0|1|6|1	11	7	0	0.00|0.00|0.00|0.00|0.00|0.01|0.00	5	0.0011	0.0075	0.8521
MTA	TTHERM_00630160	IP_AHA-S-2|IP_AHA-S-1|IP_AHA-CO-2|IP_AHA-CO-1|IP_AHA-C-3|IP_AHA-C-2|IP_AHA-C-1	0|0|0|0|0|2|0	2	7	0	0.00|0.00|0.00|0.00|0.00|0.00|0.00	2	0.0007	0.005	0.8538
MTA	TTHERM_00118710	IP_AHA-S-2|IP_AHA-S-1|IP_AHA-CO-2|IP_AHA-CO-1|IP_AHA-C-3|IP_AHA-C-2|IP_AHA-C-1	1|2|3|0|2|5|0	13	7	0	0.00|0.00|0.00|0.00|0.00|0.00|0.00	4	0.0007	0.005	0.8538
MTA	TTHERM_01084370	IP_AHA-S-2|IP_AHA-S-1|IP_AHA-CO-2|IP_AHA-CO-1|IP_AHA-C-3|IP_AHA-C-2|IP_AHA-C-1	1|12|4|1|13|16|8	55	7	0	0.00|0.00|0.00|0.00|0.00|0.00|0.00	12	0.0007	0.005	0.8538
MTA	TTHERM_00794150	IP_AHA-S-2|IP_AHA-S-1|IP_AHA-CO-2|IP_AHA-CO-1|IP_AHA-C-3|IP_AHA-C-2|IP_AHA-C-1	0|1|2|0|2|3|0	8	7	0	0.00|0.00|0.00|0.00|0.00|0.00|0.00	3	0.0007	0.005	0.8538
MTA	TTHERM_00469100	IP_AHA-S-2|IP_AHA-S-1|IP_AHA-CO-2|IP_AHA-CO-1|IP_AHA-C-3|IP_AHA-C-2|IP_AHA-C-1	0|0|0|0|2|0|0	2	7	0	0.00|0.00|0.00|0.00|0.00|0.00|0.00	2	0.0007	0.005	0.8538
MTA	TTHERM_01289080	IP_AHA-S-2|IP_AHA-S-1|IP_AHA-CO-2|IP_AHA-CO-1|IP_AHA-C-3|IP_AHA-C-2|IP_AHA-C-1	0|0|3|0|0|0|0	3	7	0	0.00|0.00|0.00|0.00|0.00|0.00|0.00	3	0.0007	0.005	0.8538
MTA	TTHERM_00053800	IP_AHA-S-2|IP_AHA-S-1|IP_AHA-CO-2|IP_AHA-CO-1|IP_AHA-C-3|IP_AHA-C-2|IP_AHA-C-1	1|3|0|0|0|0|0	4	7	0	0.00|0.00|0.00|0.00|0.00|0.00|0.00	3	0.0007	0.005	0.8538
MTA	TTHERM_00497380	IP_AHA-S-2|IP_AHA-S-1|IP_AHA-CO-2|IP_AHA-CO-1|IP_AHA-C-3|IP_AHA-C-2|IP_AHA-C-1	0|0|12|0|0|5|0	17	7	0	0.00|0.00|0.00|0.00|0.00|0.00|0.00	9	0.0004	0.0025	0.8572
MTA	TTHERM_00433490	IP_AHA-S-2|IP_AHA-S-1|IP_AHA-CO-2|IP_AHA-CO-1|IP_AHA-C-3|IP_AHA-C-2|IP_AHA-C-1	1|0|1|0|0|4|0	6	7	0	0.00|0.00|0.00|0.00|0.00|0.00|0.00	4	0.0004	0.0025	0.8572
MTA	TTHERM_000570549	IP_AHA-S-2|IP_AHA-S-1|IP_AHA-CO-2|IP_AHA-CO-1|IP_AHA-C-3|IP_AHA-C-2|IP_AHA-C-1	0|0|3|0|0|2|0	5	7	0	0.00|0.00|0.00|0.00|0.00|0.00|0.00	3	0.0004	0.0025	0.8572
MTA	TTHERM_00268030	IP_AHA-S-2|IP_AHA-S-1|IP_AHA-CO-2|IP_AHA-CO-1|IP_AHA-C-3|IP_AHA-C-2|IP_AHA-C-1	2|2|1|0|0|2|0	7	7	0	0.00|0.00|0.00|0.00|0.00|0.00|0.00	3	0.0004	0.0025	0.8572
MTA	TTHERM_00048970	IP_AHA-S-2|IP_AHA-S-1|IP_AHA-CO-2|IP_AHA-CO-1|IP_AHA-C-3|IP_AHA-C-2|IP_AHA-C-1	2|0|0|0|0|0|0	2	7	0	0.00|0.00|0.00|0.00|0.00|0.00|0.00	3	0.0004	0.0025	0.8572
MTA	TTHERM_00134940	IP_AHA-S-2|IP_AHA-S-1|IP_AHA-CO-2|IP_AHA-CO-1|IP_AHA-C-3|IP_AHA-C-2|IP_AHA-C-1	3|2|21|0|1|11|0	38	7	0	0.00|0.00|0.00|0.00|0.00|0.00|0.00	14	0.0004	0.0025	0.8572
MTA	TTHERM_00891190	IP_AHA-S-2|IP_AHA-S-1|IP_AHA-CO-2|IP_AHA-CO-1|IP_AHA-C-3|IP_AHA-C-2|IP_AHA-C-1	0|0|2|0|4|2|0	8	7	0	0.00|0.00|0.00|0.00|0.00|0.00|0.00	4	0.0004	0.0025	0.8572
MTA	TTHERM_00522160	IP_AHA-S-2|IP_AHA-S-1|IP_AHA-CO-2|IP_AHA-CO-1|IP_AHA-C-3|IP_AHA-C-2|IP_AHA-C-1	0|0|0|0|0|3|0	3	7	0	0.00|0.00|0.00|0.00|0.00|0.00|0.00	3	0.0004	0.0025	0.8572
MTA	TTHERM_00292170	IP_AHA-S-2|IP_AHA-S-1|IP_AHA-CO-2|IP_AHA-CO-1|IP_AHA-C-3|IP_AHA-C-2|IP_AHA-C-1	0|1|2|0|2|0|0	5	7	0	0.00|0.00|0.00|0.00|0.00|0.00|0.00	3	0.0004	0.0025	0.8572
MTA	TTHERM_00578520	IP_AHA-S-2|IP_AHA-S-1|IP_AHA-CO-2|IP_AHA-CO-1|IP_AHA-C-3|IP_AHA-C-2|IP_AHA-C-1	22|0|5|1|3|6|0	37	7	0	0.00|0.00|0.00|0.00|0.00|0.00|0.00	17	0.0004	0.0025	0.8572
MTA	TTHERM_01289150	IP_AHA-S-2|IP_AHA-S-1|IP_AHA-CO-2|IP_AHA-CO-1|IP_AHA-C-3|IP_AHA-C-2|IP_AHA-C-1	0|0|3|0|1|2|0	6	7	0	0.00|0.00|0.00|0.00|0.00|0.00|0.00	4	0.0004	0.0025	0.8572
MTA	TTHERM_00502240	IP_AHA-S-2|IP_AHA-S-1|IP_AHA-CO-2|IP_AHA-CO-1|IP_AHA-C-3|IP_AHA-C-2|IP_AHA-C-1	1|1|4|0|2|0|0	8	7	0	0.00|0.00|0.00|0.00|0.00|0.00|0.00	4	0.0004	0.0025	0.8572
MTA	TTHERM_00494750	IP_AHA-S-2|IP_AHA-S-1|IP_AHA-CO-2|IP_AHA-CO-1|IP_AHA-C-3|IP_AHA-C-2|IP_AHA-C-1	0|1|8|0|0|0|0	9	7	0	0.00|0.00|0.00|0.00|0.00|0.00|0.00	7	0.0004	0.0025	0.8572
MTA	TTHERM_00773580	IP_AHA-S-2|IP_AHA-S-1|IP_AHA-CO-2|IP_AHA-CO-1|IP_AHA-C-3|IP_AHA-C-2|IP_AHA-C-1	1|0|3|0|0|3|0	7	7	0	0.00|0.00|0.00|0.00|0.00|0.00|0.00	3	0.0004	0.0025	0.8572
MTB	TTHERM_00160960	IP_BHA-CO-2|IP_BHA-CO-1	0|4	4	2	0	0.00|0.00	9	0	0	0.9429
MTB	TTHERM_00442500	IP_BHA-CO-2|IP_BHA-CO-1	0|1	1	2	0	0.00|0.00	0	0	0	0.9429
MTB	TTHERM_00706380	IP_BHA-CO-2|IP_BHA-CO-1	0|1	1	2	0	0.00|0.00	0	0	0	0.9429
MTB	TTHERM_00028510	IP_BHA-CO-2|IP_BHA-CO-1	0|1	1	2	0	0.00|0.00	2	0	0	0.9429
MTB	TTHERM_00561490	IP_BHA-CO-2|IP_BHA-CO-1	0|7	7	2	0	0.00|0.00	14	0	0	0.9429
MTB	TTHERM_00387080	IP_BHA-CO-2|IP_BHA-CO-1	1|0	1	2	0	0.00|0.00	0	0	0	0.9429
MTB	TTHERM_00592690	IP_BHA-CO-2|IP_BHA-CO-1	0|1	1	2	0	0.00|0.00	0	0	0	0.9429
MTB	TTHERM_00601860	IP_BHA-CO-2|IP_BHA-CO-1	0|2	2	2	0	0.00|0.00	7	0	0	0.9429
MTB	TTHERM_01002760	IP_BHA-CO-2|IP_BHA-CO-1	0|1	1	2	0	0.00|0.00	0	0	0	0.9429
MTB	TTHERM_00471950	IP_BHA-CO-2|IP_BHA-CO-1	0|4	4	2	0	0.00|0.00	6	0	0	0.9429
MTB	TTHERM_00494750	IP_BHA-CO-2|IP_BHA-CO-1	0|7	7	2	0	0.00|0.00	7	0	0	0.9429
MTB	TTHERM_00086700	IP_BHA-CO-2|IP_BHA-CO-1	0|9	9	2	0	0.00|0.00	19	0	0	0.9429
MTB	TTHERM_00086760	IP_BHA-CO-2|IP_BHA-CO-1	0|6	6	2	0	0.00|0.00	46	0	0	0.9429
MTB	TTHERM_01053000	IP_BHA-CO-2|IP_BHA-CO-1	0|11	11	2	0	0.00|0.00	11	0	0	0.9429
MTB	TTHERM_00842500	IP_BHA-CO-2|IP_BHA-CO-1	0|3	3	2	0	0.00|0.00	4	0	0	0.9429
MTB	TTHERM_00578520	IP_BHA-CO-2|IP_BHA-CO-1	0|1	1	2	0	0.00|0.00	17	0	0	0.9429
MTB	TTHERM_00812770	IP_BHA-CO-2|IP_BHA-CO-1	0|1	1	2	0	0.00|0.00	0	0	0	0.9429
MTB	TTHERM_00637670	IP_BHA-CO-2|IP_BHA-CO-1	0|1	1	2	0	0.00|0.00	17	0	0	0.9429
MTB	TTHERM_00136430	IP_BHA-CO-2|IP_BHA-CO-1	0|1	1	2	0	0.00|0.00	2	0	0	0.9429
MTB	TTHERM_00301740	IP_BHA-CO-2|IP_BHA-CO-1	0|1	1	2	0	0.00|0.00	3	0	0	0.9429
MTB	TTHERM_00283180	IP_BHA-CO-2|IP_BHA-CO-1	0|2	2	2	0	0.00|0.00	11	0	0	0.9429
MTB	TTHERM_00343470	IP_BHA-CO-2|IP_BHA-CO-1	0|1	1	2	0	0.00|0.00	0	0	0	0.9429
MTB	TTHERM_00649420	IP_BHA-CO-2|IP_BHA-CO-1	0|9	9	2	0	0.00|0.00	7	0	0	0.9429
MTB	TTHERM_00088050	IP_BHA-CO-2|IP_BHA-CO-1	0|8	8	2	0	0.00|0.00	8	0	0	0.9429
MTB	TTHERM_00239290	IP_BHA-CO-2|IP_BHA-CO-1	0|7	7	2	0	0.00|0.00	9	0	0	0.9429
MTB	TTHERM_00219410	IP_BHA-CO-2|IP_BHA-CO-1	0|1	1	2	0	0.00|0.00	0	0	0	0.9429
MTB	TTHERM_00659130	IP_BHA-CO-2|IP_BHA-CO-1	0|1	1	2	0	0.00|0.00	0	0	0	0.9429
MTB	TTHERM_00962190	IP_BHA-CO-2|IP_BHA-CO-1	0|1	1	2	0	0.00|0.00	0	0	0	0.9429
MTB	TTHERM_00160810	IP_BHA-CO-2|IP_BHA-CO-1	2|10	12	2	0	0.00|0.00	123	0	0	0.9429
MTB	TTHERM_00716240	IP_BHA-CO-2|IP_BHA-CO-1	0|34	34	2	0	0.00|0.00	29	0	0	0.9429
MTB	TTHERM_01403810	IP_BHA-CO-2|IP_BHA-CO-1	0|1	1	2	0	0.00|0.00	0	0	0	0.9429
MTB	TTHERM_01005260	IP_BHA-CO-2|IP_BHA-CO-1	0|2	2	2	0	0.00|0.00	4	0	0	0.9429
MTB	TTHERM_001035531	IP_BHA-CO-2|IP_BHA-CO-1	0|1	1	2	0	0.00|0.00	0	0	0	0.9429
MTB	TTHERM_01207650	IP_BHA-CO-2|IP_BHA-CO-1	0|1	1	2	0	0.00|0.00	0	0	0	0.9429
MTB	TTHERM_00697490	IP_BHA-CO-2|IP_BHA-CO-1	0|8	8	2	0	0.00|0.00	15	0	0	0.9429
MTB	TTHERM_01013160	IP_BHA-CO-2|IP_BHA-CO-1	0|1	1	2	0	0.00|0.00	0	0	0	0.9429
MTB	TTHERM_01109949	IP_BHA-CO-2|IP_BHA-CO-1	0|1	1	2	0	0.00|0.00	0	0	0	0.9429
MTB	TTHERM_00333220	IP_BHA-CO-2|IP_BHA-CO-1	2|8	10	2	0	0.00|0.00	28	0	0	0.9429
MTB	TTHERM_00773340	IP_BHA-CO-2|IP_BHA-CO-1	0|49	49	2	0	0.00|0.00	60	0	0	0.9429
MTB	TTHERM_00189170	IP_BHA-CO-2|IP_BHA-CO-1	0|9	9	2	0	0.00|0.00	22	0	0	0.9429
MTB	TTHERM_00896070	IP_BHA-CO-2|IP_BHA-CO-1	0|1	1	2	0	0.00|0.00	0	0	0	0.9429
MTB	TTHERM_00484731	IP_BHA-CO-2|IP_BHA-CO-1	0|2	2	2	0	0.00|0.00	3	0	0	0.9429
MTB	TTHERM_00194540	IP_BHA-CO-2|IP_BHA-CO-1	0|2	2	2	0	0.00|0.00	13	0	0	0.9429
MTB	TTHERM_00666610	IP_BHA-CO-2|IP_BHA-CO-1	0|1	1	2	0	0.00|0.00	0	0	0	0.9429
MTB	TTHERM_01113100	IP_BHA-CO-2|IP_BHA-CO-1	0|66	66	2	0	0.00|0.00	86	0	0	0.9429
MTB	TTHERM_00137990	IP_BHA-CO-2|IP_BHA-CO-1	0|34	34	2	0	0.00|0.00	237	0	0	0.9429
MTB	TTHERM_00189370	IP_BHA-CO-2|IP_BHA-CO-1	0|4	4	2	0	0.00|0.00	15	0	0	0.9429
MTB	TTHERM_00585260	IP_BHA-CO-2|IP_BHA-CO-1	0|16	16	2	0	0.00|0.00	93	0	0	0.9429
MTB	TTHERM_00219250	IP_BHA-CO-2|IP_BHA-CO-1	0|1	1	2	0	0.00|0.00	0	0	0	0.9429
MTB	TTHERM_00016600	IP_BHA-CO-2|IP_BHA-CO-1	0|1	1	2	0	0.00|0.00	0	0	0	0.9429
MTB	TTHERM_00158520	IP_BHA-CO-2|IP_BHA-CO-1	0|3	3	2	0	0.00|0.00	30	0	0	0.9429
MTB	TTHERM_00691890	IP_BHA-CO-2|IP_BHA-CO-1	0|1	1	2	0	0.00|0.00	6	0	0	0.9429
MTB	TTHERM_00695590	IP_BHA-CO-2|IP_BHA-CO-1	0|1	1	2	0	0.00|0.00	0	0	0	0.9429
MTB	TTHERM_00443100	IP_BHA-CO-2|IP_BHA-CO-1	0|5	5	2	0	0.00|0.00	5	0	0	0.9429
MTB	TTHERM_00068170	IP_BHA-CO-2|IP_BHA-CO-1	0|3	3	2	0	0.00|0.00	9	0	0	0.9429
MTB	TTHERM_01097950	IP_BHA-CO-2|IP_BHA-CO-1	0|1	1	2	0	0.00|0.00	0	0	0	0.9429
MTB	TTHERM_00992800	IP_BHA-CO-2|IP_BHA-CO-1	0|1	1	2	0	0.00|0.00	0	0	0	0.9429
MTB	TTHERM_00522600	IP_BHA-CO-2|IP_BHA-CO-1	0|3	3	2	0	0.00|0.00	11	0	0	0.9429
MTB	TTHERM_00656000	IP_BHA-CO-2|IP_BHA-CO-1	0|1	1	2	0	0.00|0.00	0	0	0	0.9429
MTB	TTHERM_00429890	IP_BHA-CO-2|IP_BHA-CO-1	0|1	1	2	0	0.00|0.00	0	0	0	0.9429
MTB	TTHERM_000420709	IP_BHA-CO-2|IP_BHA-CO-1	0|1	1	2	0	0.00|0.00	0	0	0	0.9429
MTB	TTHERM_00722920	IP_BHA-CO-2|IP_BHA-CO-1	1|0	1	2	0	0.00|0.00	3	0	0	0.9429
MTB	TTHERM_00152220	IP_BHA-CO-2|IP_BHA-CO-1	0|1	1	2	0	0.00|0.00	8	0	0	0.9429
MTB	TTHERM_00406670	IP_BHA-CO-2|IP_BHA-CO-1	0|1	1	2	0	0.00|0.00	4	0	0	0.9429
MTB	TTHERM_01207720	IP_BHA-CO-2|IP_BHA-CO-1	0|15	15	2	0	0.00|0.00	20	0	0	0.9429
MTB	TTHERM_00145010	IP_BHA-CO-2|IP_BHA-CO-1	0|33	33	2	0	0.00|0.00	62	0	0	0.9429
MTB	TTHERM_01015930	IP_BHA-CO-2|IP_BHA-CO-1	0|6	6	2	0	0.00|0.00	15	0	0	0.9429
MTB	TTHERM_00899480	IP_BHA-CO-2|IP_BHA-CO-1	0|1	1	2	0	0.00|0.00	8	0	0	0.9429
MTB	TTHERM_00494570	IP_BHA-CO-2|IP_BHA-CO-1	0|1	1	2	0	0.00|0.00	0	0	0	0.9429
MTB	TTHERM_00623060	IP_BHA-CO-2|IP_BHA-CO-1	0|1	1	2	0	0.00|0.00	0	0	0	0.9429
MTB	TTHERM_00434070	IP_BHA-CO-2|IP_BHA-CO-1	0|18	18	2	0	0.00|0.00	28	0	0	0.9429
MTB	TTHERM_00938820	IP_BHA-CO-2|IP_BHA-CO-1	0|47	47	2	0	0.00|0.00	196	0	0	0.9429
MTB	TTHERM_00449180	IP_BHA-CO-2|IP_BHA-CO-1	0|7	7	2	0	0.00|0.00	7	0	0	0.9429
MTB	TTHERM_00551160	IP_BHA-CO-2|IP_BHA-CO-1	0|70	70	2	0	0.00|0.00	78	0	0	0.9429
MTB	TTHERM_00621550	IP_BHA-CO-2|IP_BHA-CO-1	0|1	1	2	0	0.00|0.00	0	0	0	0.9429
MTB	TTHERM_00030190	IP_BHA-CO-2|IP_BHA-CO-1	0|44	44	2	0	0.00|0.00	50	0	0	0.9429
MTB	TTHERM_00794020	IP_BHA-CO-2|IP_BHA-CO-1	0|12	12	2	0	0.00|0.00	13	0	0	0.9429
MTB	TTHERM_00024320	IP_BHA-CO-2|IP_BHA-CO-1	0|1	1	2	0	0.00|0.00	0	0	0	0.9429
MTB	TTHERM_00118710	IP_BHA-CO-2|IP_BHA-CO-1	0|4	4	2	0	0.00|0.00	4	0	0	0.9429
MTB	TTHERM_00502600	IP_BHA-CO-2|IP_BHA-CO-1	0|1	1	2	0	0.00|0.00	14	0	0	0.9429
MTB	TTHERM_01005010	IP_BHA-CO-2|IP_BHA-CO-1	0|1	1	2	0	0.00|0.00	0	0	0	0.9429
MTB	TTHERM_00579000	IP_BHA-CO-2|IP_BHA-CO-1	0|1	1	2	0	0.00|0.00	0	0	0	0.9429
MTB	TTHERM_00414440	IP_BHA-CO-2|IP_BHA-CO-1	1|38	39	2	0	0.00|0.00	80	0	0	0.9429
MTB	TTHERM_00487140	IP_BHA-CO-2|IP_BHA-CO-1	0|14	14	2	0	0.00|0.00	22	0	0	0.9429
MTB	TTHERM_00442180	IP_BHA-CO-2|IP_BHA-CO-1	0|5	5	2	0	0.00|0.00	8	0	0	0.9429
MTB	TTHERM_00196370	IP_BHA-CO-2|IP_BHA-CO-1	1|82	83	2	0	0.00|0.00	155	0	0	0.9429
MTB	TTHERM_00898250	IP_BHA-CO-2|IP_BHA-CO-1	0|1	1	2	0	0.00|0.00	0	0	0	0.9429
MTB	TTHERM_00630500	IP_BHA-CO-2|IP_BHA-CO-1	0|1	1	2	0	0.00|0.00	5	0	0	0.9429
MTB	TTHERM_00850590	IP_BHA-CO-2|IP_BHA-CO-1	0|4	4	2	0	0.00|0.00	4	0	0	0.9429
MTB	TTHERM_00918500	IP_BHA-CO-2|IP_BHA-CO-1	0|2	2	2	0	0.00|0.00	9	0	0	0.9429
MTB	TTHERM_00446190	IP_BHA-CO-2|IP_BHA-CO-1	0|8	8	2	0	0.00|0.00	30	0	0	0.9429
MTB	TTHERM_00038880	IP_BHA-CO-2|IP_BHA-CO-1	0|1	1	2	0	0.00|0.00	38	0	0	0.9429
MTB	TTHERM_00046550	IP_BHA-CO-2|IP_BHA-CO-1	0|4	4	2	0	0.00|0.00	6	0	0	0.9429
MTB	TTHERM_00298530	IP_BHA-CO-2|IP_BHA-CO-1	0|1	1	2	0	0.00|0.00	0	0	0	0.9429
MTB	TTHERM_00532090	IP_BHA-CO-2|IP_BHA-CO-1	0|1	1	2	0	0.00|0.00	17	0	0	0.9429
MTB	TTHERM_01266070	IP_BHA-CO-2|IP_BHA-CO-1	0|1	1	2	0	0.00|0.00	0	0	0	0.9429
MTB	TTHERM_00295080	IP_BHA-CO-2|IP_BHA-CO-1	0|2	2	2	0	0.00|0.00	11	0	0	0.9429
MTB	TTHERM_00194320	IP_BHA-CO-2|IP_BHA-CO-1	0|1	1	2	0	0.00|0.00	0	0	0	0.9429
MTB	TTHERM_00529860	IP_BHA-CO-2|IP_BHA-CO-1	0|2	2	2	0	0.00|0.00	11	0	0	0.9429
MTB	TTHERM_00133440	IP_BHA-CO-2|IP_BHA-CO-1	0|1	1	2	0	0.00|0.00	0	0	0	0.9429
MTB	TTHERM_00118610	IP_BHA-CO-2|IP_BHA-CO-1	0|2	2	2	0	0.00|0.00	13	0	0	0.9429
MTB	TTHERM_00561680	IP_BHA-CO-2|IP_BHA-CO-1	0|9	9	2	0	0.00|0.00	10	0	0	0.9429
MTB	TTHERM_00941540	IP_BHA-CO-2|IP_BHA-CO-1	0|1	1	2	0	0.00|0.00	0	0	0	0.9429
MTB	TTHERM_00530350	IP_BHA-CO-2|IP_BHA-CO-1	0|13	13	2	0	0.00|0.00	13	0	0	0.9429
MTB	TTHERM_00725999	IP_BHA-CO-2|IP_BHA-CO-1	0|1	1	2	0	0.00|0.00	0	0	0	0.9429
MTB	TTHERM_01084100	IP_BHA-CO-2|IP_BHA-CO-1	0|1	1	2	0	0.00|0.00	0	0	0	0.9429
MTB	TTHERM_00624310	IP_BHA-CO-2|IP_BHA-CO-1	0|1	1	2	0	0.00|0.00	0	0	0	0.9429
MTB	TTHERM_01045800	IP_BHA-CO-2|IP_BHA-CO-1	0|1	1	2	0	0.00|0.00	0	0	0	0.9429
MTB	TTHERM_00502620	IP_BHA-CO-2|IP_BHA-CO-1	0|7	7	2	0	0.00|0.00	67	0	0	0.9429
MTB	TTHERM_00499440	IP_BHA-CO-2|IP_BHA-CO-1	0|35	35	2	0	0.00|0.00	31	0	0	0.9429
MTB	TTHERM_00628710	IP_BHA-CO-2|IP_BHA-CO-1	0|1	1	2	0	0.00|0.00	0	0	0	0.9429
MTB	TTHERM_00760400	IP_BHA-CO-2|IP_BHA-CO-1	0|1	1	2	0	0.00|0.00	0	0	0	0.9429
MTB	TTHERM_00847060	IP_BHA-CO-2|IP_BHA-CO-1	1|0	1	2	0	0.00|0.00	18	0	0	0.9429
MTB	TTHERM_00295880	IP_BHA-CO-2|IP_BHA-CO-1	0|1	1	2	0	0.00|0.00	0	0	0	0.9429
MTB	TTHERM_01146030	IP_BHA-CO-2|IP_BHA-CO-1	0|9	9	2	0	0.00|0.00	66	0	0	0.9429
MTB	TTHERM_00298400	IP_BHA-CO-2|IP_BHA-CO-1	0|1	1	2	0	0.00|0.00	0	0	0	0.9429
MTB	TTHERM_00725970	IP_BHA-CO-2|IP_BHA-CO-1	3|14	17	2	0	0.00|0.00	141	0	0	0.9429
MTB	TTHERM_00079270	IP_BHA-CO-2|IP_BHA-CO-1	0|4	4	2	0	0.00|0.00	12	0	0	0.9429
MTB	TTHERM_00927010	IP_BHA-CO-2|IP_BHA-CO-1	0|2	2	2	0	0.00|0.00	15	0	0	0.9429
MTB	TTHERM_00442470	IP_BHA-CO-2|IP_BHA-CO-1	0|1	1	2	0	0.00|0.00	0	0	0	0.9429
MTB	TTHERM_00046480	IP_BHA-CO-2|IP_BHA-CO-1	0|23	23	2	0	0.00|0.00	25	0	0	0.9429
MTB	TTHERM_00151670	IP_BHA-CO-2|IP_BHA-CO-1	0|2	2	2	0	0.00|0.00	6	0	0	0.9429
MTB	TTHERM_00188910	IP_BHA-CO-2|IP_BHA-CO-1	0|1	1	2	0	0.00|0.00	0	0	0	0.9429
MTB	TTHERM_00089240	IP_BHA-CO-2|IP_BHA-CO-1	0|1	1	2	0	0.00|0.00	0	0	0	0.9429
MTB	TTHERM_00196200	IP_BHA-CO-2|IP_BHA-CO-1	0|6	6	2	0	0.00|0.00	6	0	0	0.9429
MTB	TTHERM_00467850	IP_BHA-CO-2|IP_BHA-CO-1	0|1	1	2	0	0.00|0.00	0	0	0	0.9429
MTB	TTHERM_00372410	IP_BHA-CO-2|IP_BHA-CO-1	0|2	2	2	0	0.00|0.00	44	0	0	0.9429
MTB	TTHERM_01049200	IP_BHA-CO-2|IP_BHA-CO-1	0|28	28	2	0	0.00|0.00	26	0	0	0.9429
MTB	TTHERM_00420790	IP_BHA-CO-2|IP_BHA-CO-1	0|2	2	2	0	0.00|0.00	5	0	0	0.9429
MTB	TTHERM_00242500	IP_BHA-CO-2|IP_BHA-CO-1	0|1	1	2	0	0.00|0.00	0	0	0	0.9429
MTB	TTHERM_01347920	IP_BHA-CO-2|IP_BHA-CO-1	0|3	3	2	0	0.00|0.00	5	0	0	0.9429
MTB	TTHERM_00193200	IP_BHA-CO-2|IP_BHA-CO-1	0|1	1	2	0	0.00|0.00	0	0	0	0.9429
MTB	TTHERM_00762890	IP_BHA-CO-2|IP_BHA-CO-1	0|27	27	2	0	0.00|0.00	27	0	0	0.9429
MTB	TTHERM_00318770	IP_BHA-CO-2|IP_BHA-CO-1	0|1	1	2	0	0.00|0.00	0	0	0	0.9429
MTB	TTHERM_00241700	IP_BHA-CO-2|IP_BHA-CO-1	0|10	10	2	0	0.00|0.00	36	0	0	0.9429
MTB	TTHERM_01068180	IP_BHA-CO-2|IP_BHA-CO-1	0|1	1	2	0	0.00|0.00	3	0	0	0.9429
MTB	TTHERM_00161060	IP_BHA-CO-2|IP_BHA-CO-1	0|17	17	2	0	0.00|0.00	18	0	0	0.9429
MTB	TTHERM_00334590	IP_BHA-CO-2|IP_BHA-CO-1	0|1	1	2	0	0.00|0.00	5	0	0	0.9429
MTB	TTHERM_01004930	IP_BHA-CO-2|IP_BHA-CO-1	0|9	9	2	0	0.00|0.00	13	0	0	0.9429
MTB	TTHERM_00691810	IP_BHA-CO-2|IP_BHA-CO-1	0|1	1	2	0	0.00|0.00	0	0	0	0.9429
MTB	TTHERM_00624720	IP_BHA-CO-2|IP_BHA-CO-1	0|4	4	2	0	0.00|0.00	11	0	0	0.9429
MTB	TTHERM_00486310	IP_BHA-CO-2|IP_BHA-CO-1	0|4	4	2	0	0.00|0.00	10	0	0	0.9429
MTB	TTHERM_00318570	IP_BHA-CO-2|IP_BHA-CO-1	0|10	10	2	0	0.00|0.00	7	0	0	0.9429
MTB	TTHERM_00275740	IP_BHA-CO-2|IP_BHA-CO-1	0|50	50	2	0	0.00|0.00	41	0	0	0.9429
MTB	TTHERM_00433490	IP_BHA-CO-2|IP_BHA-CO-1	0|2	2	2	0	0.00|0.00	4	0	0	0.9429
MTB	TTHERM_00691210	IP_BHA-CO-2|IP_BHA-CO-1	0|1	1	2	0	0.00|0.00	0	0	0	0.9429
MTB	TTHERM_00043910	IP_BHA-CO-2|IP_BHA-CO-1	0|1	1	2	0	0.00|0.00	0	0	0	0.9429
MTB	TTHERM_00056140	IP_BHA-CO-2|IP_BHA-CO-1	0|1	1	2	0	0.00|0.00	3	0	0	0.9429
MTB	TTHERM_00557810	IP_BHA-CO-2|IP_BHA-CO-1	0|3	3	2	0	0.00|0.00	9	0	0	0.9429
MTB	TTHERM_00797930	IP_BHA-CO-2|IP_BHA-CO-1	0|7	7	2	0	0.00|0.00	15	0	0	0.9429
MTB	TTHERM_00140940	IP_BHA-CO-2|IP_BHA-CO-1	0|1	1	2	0	0.00|0.00	0	0	0	0.9429
MTB	TTHERM_00773720	IP_BHA-CO-2|IP_BHA-CO-1	0|6	6	2	0	0.00|0.00	8	0	0	0.9429
MTB	TTHERM_01055600	IP_BHA-CO-2|IP_BHA-CO-1	0|4	4	2	0	0.00|0.00	18	0	0	0.9429
MTB	TTHERM_00180960	IP_BHA-CO-2|IP_BHA-CO-1	0|4	4	2	0	0.00|0.00	6	0	0	0.9429
MTB	TTHERM_01055480	IP_BHA-CO-2|IP_BHA-CO-1	0|1	1	2	0	0.00|0.00	0	0	0	0.9429
MTB	TTHERM_00563990	IP_BHA-CO-2|IP_BHA-CO-1	0|2	2	2	0	0.00|0.00	9	0	0	0.9429
MTB	TTHERM_00075660	IP_BHA-CO-2|IP_BHA-CO-1	0|1	1	2	0	0.00|0.00	0	0	0	0.9429
MTB	TTHERM_00658950	IP_BHA-CO-2|IP_BHA-CO-1	0|1	1	2	0	0.00|0.00	3	0	0	0.9429
MTB	TTHERM_00105330	IP_BHA-CO-2|IP_BHA-CO-1	0|5	5	2	0	0.00|0.00	12	0	0	0.9429
MTB	TTHERM_00051730	IP_BHA-CO-2|IP_BHA-CO-1	0|34	34	2	0	0.00|0.00	94	0	0	0.9429
MTB	TTHERM_00494880	IP_BHA-CO-2|IP_BHA-CO-1	0|1	1	2	0	0.00|0.00	0	0	0	0.9429
MTB	TTHERM_00410270	IP_BHA-CO-2|IP_BHA-CO-1	0|4	4	2	0	0.00|0.00	11	0	0	0.9429
MTB	TTHERM_01145010	IP_BHA-CO-2|IP_BHA-CO-1	0|3	3	2	0	0.00|0.00	5	0	0	0.9429
MTB	TTHERM_00190950	IP_BHA-CO-2|IP_BHA-CO-1	0|30	30	2	0	0.00|0.00	74	0	0	0.9429
MTB	TTHERM_00399360	IP_BHA-CO-2|IP_BHA-CO-1	0|1	1	2	0	0.00|0.00	11	0	0	0.9429
MTB	TTHERM_00713470	IP_BHA-CO-2|IP_BHA-CO-1	0|8	8	2	0	0.00|0.00	17	0	0	0.9429
MTB	TTHERM_00052260	IP_BHA-CO-2|IP_BHA-CO-1	0|1	1	2	0	0.00|0.00	0	0	0	0.9429
MTB	TTHERM_00028740	IP_BHA-CO-2|IP_BHA-CO-1	0|41	41	2	0	0.00|0.00	33	0	0	0.9429
MTB	TTHERM_01014750	IP_BHA-CO-2|IP_BHA-CO-1	1|51	52	2	0	0.00|0.00	207	0	0	0.9429
MTB	TTHERM_01108620	IP_BHA-CO-2|IP_BHA-CO-1	0|1	1	2	0	0.00|0.00	0	0	0	0.9429
MTB	TTHERM_00891190	IP_BHA-CO-2|IP_BHA-CO-1	0|1	1	2	0	0.00|0.00	4	0	0	0.9429
MTB	TTHERM_00188480	IP_BHA-CO-2|IP_BHA-CO-1	0|1	1	2	0	0.00|0.00	0	0	0	0.9429
MTB	TTHERM_00080030	IP_BHA-CO-2|IP_BHA-CO-1	0|14	14	2	0	0.00|0.00	22	0	0	0.9429
MTB	TTHERM_00895580	IP_BHA-CO-2|IP_BHA-CO-1	0|1	1	2	0	0.00|0.00	0	0	0	0.9429
MTB	TTHERM_00502220	IP_BHA-CO-2|IP_BHA-CO-1	0|1	1	2	0	0.00|0.00	3	0	0	0.9429
MTB	TTHERM_01005160	IP_BHA-CO-2|IP_BHA-CO-1	0|10	10	2	0	0.00|0.00	16	0	0	0.9429
MTB	TTHERM_00456790	IP_BHA-CO-2|IP_BHA-CO-1	0|1	1	2	0	0.00|0.00	4	0	0	0.9429
MTB	TTHERM_00131110	IP_BHA-CO-2|IP_BHA-CO-1	0|9	9	2	0	0.00|0.00	40	0	0	0.9429
MTB	TTHERM_00227060	IP_BHA-CO-2|IP_BHA-CO-1	0|1	1	2	0	0.00|0.00	0	0	0	0.9429
MTB	TTHERM_00316290	IP_BHA-CO-2|IP_BHA-CO-1	0|1	1	2	0	0.00|0.00	3	0	0	0.9429
MTB	TTHERM_01194660	IP_BHA-CO-2|IP_BHA-CO-1	0|7	7	2	0	0.00|0.00	16	0	0	0.9429
MTB	TTHERM_00395950	IP_BHA-CO-2|IP_BHA-CO-1	0|1	1	2	0	0.00|0.00	0	0	0	0.9429
MTB	TTHERM_00239380	IP_BHA-CO-2|IP_BHA-CO-1	0|1	1	2	0	0.00|0.00	9	0	0	0.9429
MTB	TTHERM_00191720	IP_BHA-CO-2|IP_BHA-CO-1	0|1	1	2	0	0.00|0.00	17	0	0	0.9429
MTB	TTHERM_00339700	IP_BHA-CO-2|IP_BHA-CO-1	0|21	21	2	0	0.00|0.00	16	0	0	0.9429
MTB	TTHERM_01345800	IP_BHA-CO-2|IP_BHA-CO-1	0|1	1	2	0	0.00|0.00	0	0	0	0.9429
MTB	TTHERM_00653950	IP_BHA-CO-2|IP_BHA-CO-1	0|1	1	2	0	0.00|0.00	0	0	0	0.9429
MTB	TTHERM_00299840	IP_BHA-CO-2|IP_BHA-CO-1	0|12	12	2	0	0.00|0.00	27	0	0	0.9429
MTB	TTHERM_00841260	IP_BHA-CO-2|IP_BHA-CO-1	0|1	1	2	0	0.00|0.00	0	0	0	0.9429
MTB	TTHERM_00661480	IP_BHA-CO-2|IP_BHA-CO-1	0|15	15	2	0	0.00|0.00	15	0	0	0.9429
MTB	TTHERM_00494580	IP_BHA-CO-2|IP_BHA-CO-1	0|1	1	2	0	0.00|0.00	0	0	0	0.9429
MTB	TTHERM_00780600	IP_BHA-CO-2|IP_BHA-CO-1	0|1	1	2	0	0.00|0.00	0	0	0	0.9429
MTB	TTHERM_00686180	IP_BHA-CO-2|IP_BHA-CO-1	0|2	2	2	0	0.00|0.00	4	0	0	0.9429
MTB	TTHERM_00735240	IP_BHA-CO-2|IP_BHA-CO-1	0|7	7	2	0	0.00|0.00	11	0	0	0.9429
MTB	TTHERM_00363210	IP_BHA-CO-2|IP_BHA-CO-1	0|6	6	2	0	0.00|0.00	15	0	0	0.9429
MTB	TTHERM_00660180	IP_BHA-CO-2|IP_BHA-CO-1	0|4	4	2	0	0.00|0.00	14	0	0	0.9429
MTB	TTHERM_01508170	IP_BHA-CO-2|IP_BHA-CO-1	0|1	1	2	0	0.00|0.00	0	0	0	0.9429
MTB	TTHERM_00600100	IP_BHA-CO-2|IP_BHA-CO-1	0|1	1	2	0	0.00|0.00	0	0	0	0.9429
MTB	TTHERM_00721530	IP_BHA-CO-2|IP_BHA-CO-1	0|1	1	2	0	0.00|0.00	0	0	0	0.9429
MTB	TTHERM_00947450	IP_BHA-CO-2|IP_BHA-CO-1	0|1	1	2	0	0.00|0.00	0	0	0	0.9429
MTB	TTHERM_00055990	IP_BHA-CO-2|IP_BHA-CO-1	0|18	18	2	0	0.00|0.00	26	0	0	0.9429
MTB	TTHERM_00448570	IP_BHA-CO-2|IP_BHA-CO-1	0|1	1	2	0	0.00|0.00	0	0	0	0.9429
MTB	TTHERM_00684790	IP_BHA-CO-2|IP_BHA-CO-1	0|1	1	2	0	0.00|0.00	9	0	0	0.9429
MTB	TTHERM_00339880	IP_BHA-CO-2|IP_BHA-CO-1	0|1	1	2	0	0.00|0.00	0	0	0	0.9429
MTB	TTHERM_00113340	IP_BHA-CO-2|IP_BHA-CO-1	0|2	2	2	0	0.00|0.00	3	0	0	0.9429
MTB	TTHERM_00485860	IP_BHA-CO-2|IP_BHA-CO-1	0|1	1	2	0	0.00|0.00	0	0	0	0.9429
MTB	TTHERM_00688500	IP_BHA-CO-2|IP_BHA-CO-1	0|1	1	2	0	0.00|0.00	5	0	0	0.9429
MTB	TTHERM_00848090	IP_BHA-CO-2|IP_BHA-CO-1	0|1	1	2	0	0.00|0.00	0	0	0	0.9429
MTB	TTHERM_00797990	IP_BHA-CO-2|IP_BHA-CO-1	0|1	1	2	0	0.00|0.00	0	0	0	0.9429
MTB	TTHERM_00637010	IP_BHA-CO-2|IP_BHA-CO-1	0|5	5	2	0	0.00|0.00	38	0	0	0.9429
MTB	TTHERM_00581440	IP_BHA-CO-2|IP_BHA-CO-1	0|1	1	2	0	0.00|0.00	0	0	0	0.9429
MTB	TTHERM_00713350	IP_BHA-CO-2|IP_BHA-CO-1	0|1	1	2	0	0.00|0.00	2	0	0	0.9429
MTB	TTHERM_01531560	IP_BHA-CO-2|IP_BHA-CO-1	0|1	1	2	0	0.00|0.00	0	0	0	0.9429
MTB	TTHERM_00421060	IP_BHA-CO-2|IP_BHA-CO-1	0|7	7	2	0	0.00|0.00	16	0	0	0.9429
MTB	TTHERM_00558120	IP_BHA-CO-2|IP_BHA-CO-1	0|1	1	2	0	0.00|0.00	0	0	0	0.9429
MTB	TTHERM_00241740	IP_BHA-CO-2|IP_BHA-CO-1	0|2	2	2	0	0.00|0.00	5	0	0	0.9429
MTB	TTHERM_00823670	IP_BHA-CO-2|IP_BHA-CO-1	0|7	7	2	0	0.00|0.00	11	0	0	0.9429
MTB	TTHERM_00382330	IP_BHA-CO-2|IP_BHA-CO-1	0|7	7	2	0	0.00|0.00	16	0	0	0.9429
MTB	TTHERM_00442240	IP_BHA-CO-2|IP_BHA-CO-1	0|1	1	2	0	0.00|0.00	0	0	0	0.9429
MTB	TTHERM_00161690	IP_BHA-CO-2|IP_BHA-CO-1	0|1	1	2	0	0.00|0.00	0	0	0	0.9429
MTB	TTHERM_000920829	IP_BHA-CO-2|IP_BHA-CO-1	0|1	1	2	0	0.00|0.00	6	0	0	0.9429
MTB	TTHERM_00857810	IP_BHA-CO-2|IP_BHA-CO-1	0|1	1	2	0	0.00|0.00	0	0	0	0.9429
MTB	TTHERM_00193910	IP_BHA-CO-2|IP_BHA-CO-1	0|1	1	2	0	0.00|0.00	4	0	0	0.9429
MTB	TTHERM_000418549	IP_BHA-CO-2|IP_BHA-CO-1	0|1	1	2	0	0.00|0.00	0	0	0	0.9429
MTB	TTHERM_01079120	IP_BHA-CO-2|IP_BHA-CO-1	0|1	1	2	0	0.00|0.00	0	0	0	0.9429
MTB	TTHERM_00859260	IP_BHA-CO-2|IP_BHA-CO-1	0|5	5	2	0	0.00|0.00	6	0	0	0.9429
MTB	TTHERM_000784559	IP_BHA-CO-2|IP_BHA-CO-1	0|7	7	2	0	0.00|0.00	12	0	0	0.9429
MTB	TTHERM_00640030	IP_BHA-CO-2|IP_BHA-CO-1	0|1	1	2	0	0.00|0.00	0	0	0	0.9429
MTB	TTHERM_00105430	IP_BHA-CO-2|IP_BHA-CO-1	0|4	4	2	0	0.00|0.00	9	0	0	0.9429
MTB	TTHERM_00526449	IP_BHA-CO-2|IP_BHA-CO-1	0|9	9	2	0	0.00|0.00	44	0	0	0.9429
MTB	TTHERM_01339580	IP_BHA-CO-2|IP_BHA-CO-1	0|22	22	2	0	0.00|0.00	43	0	0	0.9429
MTB	TTHERM_00194400	IP_BHA-CO-2|IP_BHA-CO-1	0|1	1	2	0	0.00|0.00	0	0	0	0.9429
MTB	TTHERM_01123840	IP_BHA-CO-2|IP_BHA-CO-1	0|7	7	2	0	0.00|0.00	8	0	0	0.9429
MTB	TTHERM_01345810	IP_BHA-CO-2|IP_BHA-CO-1	0|1	1	2	0	0.00|0.00	0	0	0	0.9429
MTB	TTHERM_00312320	IP_BHA-CO-2|IP_BHA-CO-1	0|1	1	2	0	0.00|0.00	3	0	0	0.9429
MTB	TTHERM_00661740	IP_BHA-CO-2|IP_BHA-CO-1	0|1	1	2	0	0.00|0.00	12	0	0	0.9429
MTB	TTHERM_00068140	IP_BHA-CO-2|IP_BHA-CO-1	0|13	13	2	0	0.00|0.00	43	0	0	0.9429
MTB	TTHERM_000131339	IP_BHA-CO-2|IP_BHA-CO-1	0|1	1	2	0	0.00|0.00	0	0	0	0.9429
MTB	TTHERM_00197760	IP_BHA-CO-2|IP_BHA-CO-1	0|3	3	2	0	0.00|0.00	25	0	0	0.9429
MTB	TTHERM_01367670	IP_BHA-CO-2|IP_BHA-CO-1	0|1	1	2	0	0.00|0.00	0	0	0	0.9429
MTB	TTHERM_00487090	IP_BHA-CO-2|IP_BHA-CO-1	0|2	2	2	0	0.00|0.00	13	0	0	0.9429
MTB	TTHERM_00155550	IP_BHA-CO-2|IP_BHA-CO-1	0|1	1	2	0	0.00|0.00	0	0	0	0.9429
MTB	TTHERM_00149300	IP_BHA-CO-2|IP_BHA-CO-1	0|62	62	2	0	0.00|0.00	61	0	0	0.9429
MTB	TTHERM_00059190	IP_BHA-CO-2|IP_BHA-CO-1	0|23	23	2	0	0.00|0.00	20	0	0	0.9429
MTB	TTHERM_00930770	IP_BHA-CO-2|IP_BHA-CO-1	0|1	1	2	0	0.00|0.00	5	0	0	0.9429
MTB	TTHERM_01435690	IP_BHA-CO-2|IP_BHA-CO-1	0|1	1	2	0	0.00|0.00	0	0	0	0.9429
MTB	TTHERM_01386050	IP_BHA-CO-2|IP_BHA-CO-1	0|19	19	2	0	0.00|0.00	33	0	0	0.9429
MTB	TTHERM_00713270	IP_BHA-CO-2|IP_BHA-CO-1	0|1	1	2	0	0.00|0.00	0	0	0	0.9429
MTB	TTHERM_00444220	IP_BHA-CO-2|IP_BHA-CO-1	0|5	5	2	0	0.00|0.00	5	0	0	0.9429
MTB	TTHERM_00865350	IP_BHA-CO-2|IP_BHA-CO-1	0|1	1	2	0	0.00|0.00	2	0	0	0.9429
MTB	TTHERM_00149798	IP_BHA-CO-2|IP_BHA-CO-1	0|30	30	2	0	0.00|0.00	52	0	0	0.9429
MTB	TTHERM_00256780	IP_BHA-CO-2|IP_BHA-CO-1	0|1	1	2	0	0.00|0.00	0	0	0	0.9429
MTB	TTHERM_00890150	IP_BHA-CO-2|IP_BHA-CO-1	0|1	1	2	0	0.00|0.00	0	0	0	0.9429
MTB	TTHERM_00218790	IP_BHA-CO-2|IP_BHA-CO-1	0|1	1	2	0	0.00|0.00	12	0	0	0.9429
MTB	TTHERM_00434040	IP_BHA-CO-2|IP_BHA-CO-1	0|3	3	2	0	0.00|0.00	8	0	0	0.9429
MTB	TTHERM_00433610	IP_BHA-CO-2|IP_BHA-CO-1	0|1	1	2	0	0.00|0.00	0	0	0	0.9429
MTB	TTHERM_00836690	IP_BHA-CO-2|IP_BHA-CO-1	0|12	12	2	0	0.00|0.00	94	0	0	0.9429
MTB	TTHERM_01128560	IP_BHA-CO-2|IP_BHA-CO-1	0|11	11	2	0	0.00|0.00	29	0	0	0.9429
MTB	TTHERM_00760270	IP_BHA-CO-2|IP_BHA-CO-1	0|1	1	2	0	0.00|0.00	0	0	0	0.9429
MTB	TTHERM_000530149	IP_BHA-CO-2|IP_BHA-CO-1	0|2	2	2	0	0.00|0.00	4	0	0	0.9429
MTB	TTHERM_00138459	IP_BHA-CO-2|IP_BHA-CO-1	0|1	1	2	0	0.00|0.00	0	0	0	0.9429
MTB	TTHERM_00105110	IP_BHA-CO-2|IP_BHA-CO-1	0|22	22	2	0	0.00|0.00	99	0	0	0.9429
MTB	TTHERM_00551150	IP_BHA-CO-2|IP_BHA-CO-1	0|3	3	2	0	0.00|0.00	4	0	0	0.9429
MTB	TTHERM_00616320	IP_BHA-CO-2|IP_BHA-CO-1	0|1	1	2	0	0.00|0.00	0	0	0	0.9429
MTB	TTHERM_00794150	IP_BHA-CO-2|IP_BHA-CO-1	0|1	1	2	0	0.00|0.00	3	0	0	0.9429
MTB	TTHERM_00194240	IP_BHA-CO-2|IP_BHA-CO-1	0|1	1	2	0	0.00|0.00	0	0	0	0.9429
MTB	TTHERM_00194530	IP_BHA-CO-2|IP_BHA-CO-1	0|10	10	2	0	0.00|0.00	21	0	0	0.9429
MTB	TTHERM_00299570	IP_BHA-CO-2|IP_BHA-CO-1	0|8	8	2	0	0.00|0.00	22	0	0	0.9429
MTB	TTHERM_00829380	IP_BHA-CO-2|IP_BHA-CO-1	0|24	24	2	0	0.00|0.00	15	0	0	0.9429
MTB	TTHERM_01325770	IP_BHA-CO-2|IP_BHA-CO-1	0|1	1	2	0	0.00|0.00	0	0	0	0.9429
MTB	TTHERM_00077050	IP_BHA-CO-2|IP_BHA-CO-1	0|1	1	2	0	0.00|0.00	0	0	0	0.9429
MTB	TTHERM_01093510	IP_BHA-CO-2|IP_BHA-CO-1	0|3	3	2	0	0.00|0.00	298	0	0	0.9429
MTB	TTHERM_00647339	IP_BHA-CO-2|IP_BHA-CO-1	0|21	21	2	0	0.00|0.00	35	0	0	0.9429
MTB	TTHERM_00393040	IP_BHA-CO-2|IP_BHA-CO-1	1|13	14	2	0	0.00|0.00	17	0	0	0.9429
MTB	TTHERM_00344030	IP_BHA-CO-2|IP_BHA-CO-1	0|5	5	2	0	0.00|0.00	16	0	0	0.9429
MTB	TTHERM_00013070	IP_BHA-CO-2|IP_BHA-CO-1	0|12	12	2	0	0.00|0.00	15	0	0	0.9429
MTB	TTHERM_00280990	IP_BHA-CO-2|IP_BHA-CO-1	0|2	2	2	0	0.00|0.00	4	0	0	0.9429
MTB	TTHERM_00899460	IP_BHA-CO-2|IP_BHA-CO-1	0|15	15	2	0	0.00|0.00	31	0	0	0.9429
MTB	TTHERM_00053780	IP_BHA-CO-2|IP_BHA-CO-1	0|1	1	2	0	0.00|0.00	0	0	0	0.9429
MTB	TTHERM_00426260	IP_BHA-CO-2|IP_BHA-CO-1	0|6	6	2	0	0.00|0.00	24	0	0	0.9429
MTB	TTHERM_00399550	IP_BHA-CO-2|IP_BHA-CO-1	0|1	1	2	0	0.00|0.00	0	0	0	0.9429
MTB	TTHERM_01001570	IP_BHA-CO-2|IP_BHA-CO-1	0|9	9	2	0	0.00|0.00	21	0	0	0.9429
MTB	TTHERM_01194820	IP_BHA-CO-2|IP_BHA-CO-1	0|1	1	2	0	0.00|0.00	0	0	0	0.9429
MTB	TTHERM_00918510	IP_BHA-CO-2|IP_BHA-CO-1	0|11	11	2	0	0.00|0.00	21	0	0	0.9429
MTB	TTHERM_01161000	IP_BHA-CO-2|IP_BHA-CO-1	0|1	1	2	0	0.00|0.00	8	0	0	0.9429
MTB	TTHERM_00037640	IP_BHA-CO-2|IP_BHA-CO-1	0|9	9	2	0	0.00|0.00	8	0	0	0.9429
MTB	TTHERM_00535260	IP_BHA-CO-2|IP_BHA-CO-1	0|20	20	2	0	0.00|0.00	67	0	0	0.9429
MTB	TTHERM_00773380	IP_BHA-CO-2|IP_BHA-CO-1	1|0	1	2	0	0.00|0.00	0	0	0	0.9429
MTB	TTHERM_00047480	IP_BHA-CO-2|IP_BHA-CO-1	0|38	38	2	0	0.00|0.00	58	0	0	0.9429
MTB	TTHERM_01151500	IP_BHA-CO-2|IP_BHA-CO-1	0|68	68	2	0	0.00|0.00	59	0	0	0.9429
MTB	TTHERM_00420290	IP_BHA-CO-2|IP_BHA-CO-1	0|11	11	2	0	0.00|0.00	13	0	0	0.9429
MTB	TTHERM_00158450	IP_BHA-CO-2|IP_BHA-CO-1	0|3	3	2	0	0.00|0.00	5	0	0	0.9429
MTB	TTHERM_00041590	IP_BHA-CO-2|IP_BHA-CO-1	0|1	1	2	0	0.00|0.00	0	0	0	0.9429
MTB	TTHERM_00332160	IP_BHA-CO-2|IP_BHA-CO-1	0|1	1	2	0	0.00|0.00	0	0	0	0.9429
MTB	TTHERM_00122290	IP_BHA-CO-2|IP_BHA-CO-1	0|5	5	2	0	0.00|0.00	9	0	0	0.9429
MTB	TTHERM_01002600	IP_BHA-CO-2|IP_BHA-CO-1	0|3	3	2	0	0.00|0.00	123	0	0	0.9429
MTB	TTHERM_00784600	IP_BHA-CO-2|IP_BHA-CO-1	0|1	1	2	0	0.00|0.00	0	0	0	0.9429
MTB	TTHERM_01043090	IP_BHA-CO-2|IP_BHA-CO-1	0|9	9	2	0	0.00|0.00	9	0	0	0.9429
MTB	TTHERM_00424720	IP_BHA-CO-2|IP_BHA-CO-1	0|2	2	2	0	0.00|0.00	8	0	0	0.9429
MTB	TTHERM_00578640	IP_BHA-CO-2|IP_BHA-CO-1	0|44	44	2	0	0.00|0.00	35	0	0	0.9429
MTB	TTHERM_00499370	IP_BHA-CO-2|IP_BHA-CO-1	0|1	1	2	0	0.00|0.00	0	0	0	0.9429
MTB	TTHERM_00636970	IP_BHA-CO-2|IP_BHA-CO-1	0|59	59	2	0	0.00|0.00	37	0	0	0.9429
MTB	TTHERM_00865200	IP_BHA-CO-2|IP_BHA-CO-1	0|1	1	2	0	0.00|0.00	0	0	0	0.9429
MTB	TTHERM_00579340	IP_BHA-CO-2|IP_BHA-CO-1	0|1	1	2	0	0.00|0.00	0	0	0	0.9429
MTB	TTHERM_00420000	IP_BHA-CO-2|IP_BHA-CO-1	0|1	1	2	0	0.00|0.00	0	0	0	0.9429
MTB	TTHERM_00971800	IP_BHA-CO-2|IP_BHA-CO-1	0|10	10	2	0	0.00|0.00	8	0	0	0.9429
MTB	TTHERM_00302050	IP_BHA-CO-2|IP_BHA-CO-1	0|1	1	2	0	0.00|0.00	0	0	0	0.9429
MTB	TTHERM_00777260	IP_BHA-CO-2|IP_BHA-CO-1	0|6	6	2	0	0.00|0.00	61	0	0	0.9429
MTB	TTHERM_00835340	IP_BHA-CO-2|IP_BHA-CO-1	0|1	1	2	0	0.00|0.00	0	0	0	0.9429
MTB	TTHERM_00316500	IP_BHA-CO-2|IP_BHA-CO-1	0|2	2	2	0	0.00|0.00	6	0	0	0.9429
MTB	TTHERM_00649490	IP_BHA-CO-2|IP_BHA-CO-1	0|1	1	2	0	0.00|0.00	0	0	0	0.9429
MTB	TTHERM_00723290	IP_BHA-CO-2|IP_BHA-CO-1	0|6	6	2	0	0.00|0.00	9	0	0	0.9429
MTB	TTHERM_00101310	IP_BHA-CO-2|IP_BHA-CO-1	0|1	1	2	0	0.00|0.00	0	0	0	0.9429
MTB	TTHERM_00378890	IP_BHA-CO-2|IP_BHA-CO-1	0|2	2	2	0	0.00|0.00	4	0	0	0.9429
MTB	TTHERM_00666640	IP_BHA-CO-2|IP_BHA-CO-1	0|18	18	2	0	0.00|0.00	20	0	0	0.9429
MTB	TTHERM_00624430	IP_BHA-CO-2|IP_BHA-CO-1	0|1	1	2	0	0.00|0.00	0	0	0	0.9429
MTB	TTHERM_00268070	IP_BHA-CO-2|IP_BHA-CO-1	0|18	18	2	0	0.00|0.00	39	0	0	0.9429
MTB	TTHERM_00312770	IP_BHA-CO-2|IP_BHA-CO-1	0|1	1	2	0	0.00|0.00	0	0	0	0.9429
MTB	TTHERM_00727630	IP_BHA-CO-2|IP_BHA-CO-1	0|6	6	2	0	0.00|0.00	22	0	0	0.9429
MTB	TTHERM_00649060	IP_BHA-CO-2|IP_BHA-CO-1	0|3	3	2	0	0.00|0.00	17	0	0	0.9429
MTB	TTHERM_00193740	IP_BHA-CO-2|IP_BHA-CO-1	0|28	28	2	0	0.00|0.00	40	0	0	0.9429
MTB	TTHERM_00243800	IP_BHA-CO-2|IP_BHA-CO-1	0|1	1	2	0	0.00|0.00	0	0	0	0.9429
MTB	TTHERM_00316530	IP_BHA-CO-2|IP_BHA-CO-1	0|1	1	2	0	0.00|0.00	0	0	0	0.9429
MTB	TTHERM_00430020	IP_BHA-CO-2|IP_BHA-CO-1	0|1	1	2	0	0.00|0.00	0	0	0	0.9429
MTB	TTHERM_00293300	IP_BHA-CO-2|IP_BHA-CO-1	0|1	1	2	0	0.00|0.00	0	0	0	0.9429
MTB	TTHERM_00506900	IP_BHA-CO-2|IP_BHA-CO-1	0|6	6	2	0	0.00|0.00	11	0	0	0.9429
MTB	TTHERM_00467959	IP_BHA-CO-2|IP_BHA-CO-1	0|1	1	2	0	0.00|0.00	0	0	0	0.9429
MTB	TTHERM_01263930	IP_BHA-CO-2|IP_BHA-CO-1	0|1	1	2	0	0.00|0.00	0	0	0	0.9429
MTB	TTHERM_00218930	IP_BHA-CO-2|IP_BHA-CO-1	0|2	2	2	0	0.00|0.00	3	0	0	0.9429
MTB	TTHERM_00274500	IP_BHA-CO-2|IP_BHA-CO-1	0|3	3	2	0	0.00|0.00	77	0	0	0.9429
MTB	TTHERM_01091280	IP_BHA-CO-2|IP_BHA-CO-1	0|5	5	2	0	0.00|0.00	24	0	0	0.9429
MTB	TTHERM_00535500	IP_BHA-CO-2|IP_BHA-CO-1	0|4	4	2	0	0.00|0.00	6	0	0	0.9429
MTB	TTHERM_00353280	IP_BHA-CO-2|IP_BHA-CO-1	0|2	2	2	0	0.00|0.00	23	0	0	0.9429
MTB	TTHERM_00327100	IP_BHA-CO-2|IP_BHA-CO-1	0|1	1	2	0	0.00|0.00	0	0	0	0.9429
MTB	TTHERM_00275750	IP_BHA-CO-2|IP_BHA-CO-1	0|2	2	2	0	0.00|0.00	4	0	0	0.9429
MTB	TTHERM_00463450	IP_BHA-CO-2|IP_BHA-CO-1	0|5	5	2	0	0.00|0.00	6	0	0	0.9429
MTB	TTHERM_00666180	IP_BHA-CO-2|IP_BHA-CO-1	0|7	7	2	0	0.00|0.00	54	0	0	0.9429
MTB	TTHERM_00637030	IP_BHA-CO-2|IP_BHA-CO-1	0|1	1	2	0	0.00|0.00	0	0	0	0.9429
MTB	TTHERM_00520920	IP_BHA-CO-2|IP_BHA-CO-1	0|1	1	2	0	0.00|0.00	0	0	0	0.9429
MTB	TTHERM_00149630	IP_BHA-CO-2|IP_BHA-CO-1	0|10	10	2	0	0.00|0.00	9	0	0	0.9429
MTB	TTHERM_00444280	IP_BHA-CO-2|IP_BHA-CO-1	0|1	1	2	0	0.00|0.00	0	0	0	0.9429
MTB	TTHERM_00158370	IP_BHA-CO-2|IP_BHA-CO-1	0|1	1	2	0	0.00|0.00	0	0	0	0.9429
MTB	TTHERM_00538940	IP_BHA-CO-2|IP_BHA-CO-1	0|9	9	2	0	0.00|0.00	21	0	0	0.9429
MTB	TTHERM_01044390	IP_BHA-CO-2|IP_BHA-CO-1	1|0	1	2	0	0.00|0.00	0	0	0	0.9429
MTB	TTHERM_00193310	IP_BHA-CO-2|IP_BHA-CO-1	0|2	2	2	0	0.00|0.00	12	0	0	0.9429
MTB	TTHERM_00197650	IP_BHA-CO-2|IP_BHA-CO-1	0|1	1	2	0	0.00|0.00	0	0	0	0.9429
MTB	TTHERM_00666540	IP_BHA-CO-2|IP_BHA-CO-1	0|17	17	2	0	0.00|0.00	15	0	0	0.9429
MTB	TTHERM_00600650	IP_BHA-CO-2|IP_BHA-CO-1	1|39	40	2	0	0.00|0.00	41	0	0	0.9429
MTB	TTHERM_00636980	IP_BHA-CO-2|IP_BHA-CO-1	0|5	5	2	0	0.00|0.00	13	0	0	0.9429
MTB	TTHERM_00382380	IP_BHA-CO-2|IP_BHA-CO-1	0|12	12	2	0	0.00|0.00	35	0	0	0.9429
MTB	TTHERM_00940290	IP_BHA-CO-2|IP_BHA-CO-1	0|1	1	2	0	0.00|0.00	16	0	0	0.9429
MTB	TTHERM_00335640	IP_BHA-CO-2|IP_BHA-CO-1	0|2	2	2	0	0.00|0.00	9	0	0	0.9429
MTB	TTHERM_00499650	IP_BHA-CO-2|IP_BHA-CO-1	0|3	3	2	0	0.00|0.00	5	0	0	0.9429
MTB	TTHERM_00474970	IP_BHA-CO-2|IP_BHA-CO-1	0|20	20	2	0	0.00|0.00	15	0	0	0.9429
MTB	TTHERM_00068120	IP_BHA-CO-2|IP_BHA-CO-1	0|2	2	2	0	0.00|0.00	7	0	0	0.9429
MTB	TTHERM_01000190	IP_BHA-CO-2|IP_BHA-CO-1	0|6	6	2	0	0.00|0.00	19	0	0	0.9429
MTB	TTHERM_00283850	IP_BHA-CO-2|IP_BHA-CO-1	0|9	9	2	0	0.00|0.00	25	0	0	0.9429
MTB	TTHERM_00659070	IP_BHA-CO-2|IP_BHA-CO-1	0|1	1	2	0	0.00|0.00	2	0	0	0.9429
MTB	TTHERM_00752180	IP_BHA-CO-2|IP_BHA-CO-1	0|1	1	2	0	0.00|0.00	0	0	0	0.9429
MTB	TTHERM_00535150	IP_BHA-CO-2|IP_BHA-CO-1	0|1	1	2	0	0.00|0.00	0	0	0	0.9429
MTB	TTHERM_00499420	IP_BHA-CO-2|IP_BHA-CO-1	0|88	88	2	0	0.00|0.00	116	0	0	0.9429
MTB	TTHERM_000442899	IP_BHA-CO-2|IP_BHA-CO-1	0|16	16	2	0	0.00|0.00	32	0	0	0.9429
MTB	TTHERM_00101500	IP_BHA-CO-2|IP_BHA-CO-1	0|1	1	2	0	0.00|0.00	0	0	0	0.9429
MTB	TTHERM_00600110	IP_BHA-CO-2|IP_BHA-CO-1	0|7	7	2	0	0.00|0.00	9	0	0	0.9429
MTB	TTHERM_00138610	IP_BHA-CO-2|IP_BHA-CO-1	2|15	17	2	0	0.00|0.00	294	0	0	0.9429
MTB	TTHERM_00787240	IP_BHA-CO-2|IP_BHA-CO-1	0|4	4	2	0	0.00|0.00	5	0	0	0.9429
MTB	TTHERM_00079200	IP_BHA-CO-2|IP_BHA-CO-1	0|1	1	2	0	0.00|0.00	14	0	0	0.9429
MTB	TTHERM_00043870	IP_BHA-CO-2|IP_BHA-CO-1	0|33	33	2	0	0.00|0.00	63	0	0	0.9429
MTB	TTHERM_00497630	IP_BHA-CO-2|IP_BHA-CO-1	0|1	1	2	0	0.00|0.00	0	0	0	0.9429
MTB	TTHERM_00641120	IP_BHA-CO-2|IP_BHA-CO-1	0|1	1	2	0	0.00|0.00	0	0	0	0.9429
MTB	TTHERM_00379000	IP_BHA-CO-2|IP_BHA-CO-1	0|16	16	2	0	0.00|0.00	100	0	0	0.9429
MTB	TTHERM_00497880	IP_BHA-CO-2|IP_BHA-CO-1	0|39	39	2	0	0.00|0.00	58	0	0	0.9429
MTB	TTHERM_00214830	IP_BHA-CO-2|IP_BHA-CO-1	0|27	27	2	0	0.00|0.00	41	0	0	0.9429
MTB	TTHERM_00316280	IP_BHA-CO-2|IP_BHA-CO-1	0|4	4	2	0	0.00|0.00	4	0	0	0.9429
MTB	TTHERM_00419920	IP_BHA-CO-2|IP_BHA-CO-1	0|1	1	2	0	0.00|0.00	0	0	0	0.9429
MTB	TTHERM_00142350	IP_BHA-CO-2|IP_BHA-CO-1	0|1	1	2	0	0.00|0.00	0	0	0	0.9429
MTB	TTHERM_00723390	IP_BHA-CO-2|IP_BHA-CO-1	0|11	11	2	0	0.00|0.00	9	0	0	0.9429
MTB	TTHERM_00059330	IP_BHA-CO-2|IP_BHA-CO-1	0|1	1	2	0	0.00|0.00	20	0	0	0.9429
MTB	TTHERM_01362500	IP_BHA-CO-2|IP_BHA-CO-1	0|1	1	2	0	0.00|0.00	0	0	0	0.9429
MTB	TTHERM_00123730	IP_BHA-CO-2|IP_BHA-CO-1	0|1	1	2	0	0.00|0.00	0	0	0	0.9429
MTB	TTHERM_00082240	IP_BHA-CO-2|IP_BHA-CO-1	0|1	1	2	0	0.00|0.00	0	0	0	0.9429
MTB	TTHERM_00030200	IP_BHA-CO-2|IP_BHA-CO-1	0|1	1	2	0	0.00|0.00	0	0	0	0.9429
MTB	TTHERM_00657270	IP_BHA-CO-2|IP_BHA-CO-1	0|1	1	2	0	0.00|0.00	3	0	0	0.9429
MTB	TTHERM_00557910	IP_BHA-CO-2|IP_BHA-CO-1	0|1	1	2	0	0.00|0.00	5	0	0	0.9429
MTB	TTHERM_00101210	IP_BHA-CO-2|IP_BHA-CO-1	0|1	1	2	0	0.00|0.00	0	0	0	0.9429
MTB	TTHERM_00545860	IP_BHA-CO-2|IP_BHA-CO-1	0|1	1	2	0	0.00|0.00	0	0	0	0.9429
MTB	TTHERM_00439130	IP_BHA-CO-2|IP_BHA-CO-1	1|0	1	2	0	0.00|0.00	0	0	0	0.9429
MTB	TTHERM_00035580	IP_BHA-CO-2|IP_BHA-CO-1	0|7	7	2	0	0.00|0.00	9	0	0	0.9429
MTB	TTHERM_01002890	IP_BHA-CO-2|IP_BHA-CO-1	0|1	1	2	0	0.00|0.00	0	0	0	0.9429
MTB	TTHERM_00048910	IP_BHA-CO-2|IP_BHA-CO-1	0|1	1	2	0	0.00|0.00	0	0	0	0.9429
MTB	TTHERM_00077230	IP_BHA-CO-2|IP_BHA-CO-1	0|12	12	2	0	0.00|0.00	14	0	0	0.9429
MTB	TTHERM_00675650	IP_BHA-CO-2|IP_BHA-CO-1	0|1	1	2	0	0.00|0.00	0	0	0	0.9429
MTB	TTHERM_00529790	IP_BHA-CO-2|IP_BHA-CO-1	0|35	35	2	0	0.00|0.00	49	0	0	0.9429
MTB	TTHERM_00251120	IP_BHA-CO-2|IP_BHA-CO-1	1|1	2	2	0	0.00|0.00	38	0	0	0.9429
MTB	TTHERM_000584709	IP_BHA-CO-2|IP_BHA-CO-1	0|2	2	2	0	0.00|0.00	17	0	0	0.9429
MTB	TTHERM_00569200	IP_BHA-CO-2|IP_BHA-CO-1	0|2	2	2	0	0.00|0.00	108	0	0	0.9429
MTB	TTHERM_00756300	IP_BHA-CO-2|IP_BHA-CO-1	0|1	1	2	0	0.00|0.00	0	0	0	0.9429
MTB	TTHERM_00954320	IP_BHA-CO-2|IP_BHA-CO-1	0|1	1	2	0	0.00|0.00	0	0	0	0.9429
MTB	TTHERM_00492850	IP_BHA-CO-2|IP_BHA-CO-1	0|2	2	2	0	0.00|0.00	3	0	0	0.9429
MTB	TTHERM_00530750	IP_BHA-CO-2|IP_BHA-CO-1	0|17	17	2	0	0.00|0.00	55	0	0	0.9429
MTB	TTHERM_00194650	IP_BHA-CO-2|IP_BHA-CO-1	1|6	7	2	0	0.00|0.00	14	0	0	0.9429
MTB	TTHERM_00114360	IP_BHA-CO-2|IP_BHA-CO-1	0|1	1	2	0	0.00|0.00	2	0	0	0.9429
MTB	TTHERM_00421170	IP_BHA-CO-2|IP_BHA-CO-1	0|1	1	2	0	0.00|0.00	0	0	0	0.9429
MTB	TTHERM_00302060	IP_BHA-CO-2|IP_BHA-CO-1	0|17	17	2	0	0.00|0.00	22	0	0	0.9429
MTB	TTHERM_00659010	IP_BHA-CO-2|IP_BHA-CO-1	0|3	3	2	0	0.00|0.00	13	0	0	0.9429
MTB	TTHERM_00155370	IP_BHA-CO-2|IP_BHA-CO-1	0|1	1	2	0	0.00|0.00	0	0	0	0.9429
MTB	TTHERM_00112550	IP_BHA-CO-2|IP_BHA-CO-1	0|4	4	2	0	0.00|0.00	9	0	0	0.9429
MTB	TTHERM_00929450	IP_BHA-CO-2|IP_BHA-CO-1	0|23	23	2	0	0.00|0.00	24	0	0	0.9429
MTB	TTHERM_01345770	IP_BHA-CO-2|IP_BHA-CO-1	2|34	36	2	0	0.00|0.00	77	0	0	0.9429
MTB	TTHERM_00487020	IP_BHA-CO-2|IP_BHA-CO-1	0|5	5	2	0	0.00|0.00	17	0	0	0.9429
MTB	TTHERM_000723629	IP_BHA-CO-2|IP_BHA-CO-1	0|3	3	2	0	0.00|0.00	6	0	0	0.9429
MTB	TTHERM_00784570	IP_BHA-CO-2|IP_BHA-CO-1	0|1	1	2	0	0.00|0.00	0	0	0	0.9429
MTB	TTHERM_00961950	IP_BHA-CO-2|IP_BHA-CO-1	0|9	9	2	0	0.00|0.00	7	0	0	0.9429
MTB	TTHERM_00527180	IP_BHA-CO-2|IP_BHA-CO-1	0|8	8	2	0	0.00|0.00	57	0	0	0.9429
MTB	TTHERM_00086970	IP_BHA-CO-2|IP_BHA-CO-1	0|1	1	2	0	0.00|0.00	0	0	0	0.9429
MTB	TTHERM_01002860	IP_BHA-CO-2|IP_BHA-CO-1	0|9	9	2	0	0.00|0.00	140	0	0	0.9429
MTB	TTHERM_00242250	IP_BHA-CO-2|IP_BHA-CO-1	0|3	3	2	0	0.00|0.00	4	0	0	0.9429
MTB	TTHERM_00557760	IP_BHA-CO-2|IP_BHA-CO-1	0|1	1	2	0	0.00|0.00	6	0	0	0.9429
MTB	TTHERM_00773690	IP_BHA-CO-2|IP_BHA-CO-1	0|3	3	2	0	0.00|0.00	8	0	0	0.9429
MTB	TTHERM_00290740	IP_BHA-CO-2|IP_BHA-CO-1	0|1	1	2	0	0.00|0.00	0	0	0	0.9429
MTB	TTHERM_00016360	IP_BHA-CO-2|IP_BHA-CO-1	0|6	6	2	0	0.00|0.00	14	0	0	0.9429
MTB	TTHERM_00049030	IP_BHA-CO-2|IP_BHA-CO-1	0|1	1	2	0	0.00|0.00	3	0	0	0.9429
MTB	TTHERM_00790540	IP_BHA-CO-2|IP_BHA-CO-1	0|1	1	2	0	0.00|0.00	0	0	0	0.9429
MTB	TTHERM_00488340	IP_BHA-CO-2|IP_BHA-CO-1	0|12	12	2	0	0.00|0.00	12	0	0	0.9429
MTB	TTHERM_00703580	IP_BHA-CO-2|IP_BHA-CO-1	0|16	16	2	0	0.00|0.00	117	0	0	0.9429
MTB	TTHERM_00584840	IP_BHA-CO-2|IP_BHA-CO-1	0|1	1	2	0	0.00|0.00	0	0	0	0.9429
MTB	TTHERM_00151470	IP_BHA-CO-2|IP_BHA-CO-1	0|6	6	2	0	0.00|0.00	9	0	0	0.9429
MTB	TTHERM_00475310	IP_BHA-CO-2|IP_BHA-CO-1	0|1	1	2	0	0.00|0.00	9	0	0	0.9429
MTB	TTHERM_00348660	IP_BHA-CO-2|IP_BHA-CO-1	0|1	1	2	0	0.00|0.00	0	0	0	0.9429
MTB	TTHERM_00384910	IP_BHA-CO-2|IP_BHA-CO-1	0|1	1	2	0	0.00|0.00	6	0	0	0.9429
MTB	TTHERM_01197120	IP_BHA-CO-2|IP_BHA-CO-1	0|3	3	2	0	0.00|0.00	8	0	0	0.9429
MTB	TTHERM_00193230	IP_BHA-CO-2|IP_BHA-CO-1	0|10	10	2	0	0.00|0.00	24	0	0	0.9429
MTB	TTHERM_00220710	IP_BHA-CO-2|IP_BHA-CO-1	0|6	6	2	0	0.00|0.00	62	0	0	0.9429
MTB	TTHERM_00822340	IP_BHA-CO-2|IP_BHA-CO-1	0|1	1	2	0	0.00|0.00	0	0	0	0.9429
MTB	TTHERM_00085180	IP_BHA-CO-2|IP_BHA-CO-1	0|16	16	2	0	0.00|0.00	14	0	0	0.9429
MTB	TTHERM_00441900	IP_BHA-CO-2|IP_BHA-CO-1	0|1	1	2	0	0.00|0.00	0	0	0	0.9429
MTB	TTHERM_00727790	IP_BHA-CO-2|IP_BHA-CO-1	0|2	2	2	0	0.00|0.00	4	0	0	0.9429
MTB	TTHERM_000721479	IP_BHA-CO-2|IP_BHA-CO-1	0|1	1	2	0	0.00|0.00	0	0	0	0.9429
MTB	TTHERM_01513260	IP_BHA-CO-2|IP_BHA-CO-1	0|1	1	2	0	0.00|0.00	10	0	0	0.9429
MTB	TTHERM_00221120	IP_BHA-CO-2|IP_BHA-CO-1	2|15	17	2	0	0.00|0.00	151	0	0	0.9429
MTB	TTHERM_00181090	IP_BHA-CO-2|IP_BHA-CO-1	0|1	1	2	0	0.00|0.00	0	0	0	0.9429
MTB	TTHERM_00257230	IP_BHA-CO-2|IP_BHA-CO-1	0|4	4	2	0	0.00|0.00	14	0	0	0.9429
MTB	TTHERM_00138150	IP_BHA-CO-2|IP_BHA-CO-1	0|12	12	2	0	0.00|0.00	15	0	0	0.9429
MTB	TTHERM_00338200	IP_BHA-CO-2|IP_BHA-CO-1	0|2	2	2	0	0.00|0.00	99	0	0	0.9429
MTB	TTHERM_00292170	IP_BHA-CO-2|IP_BHA-CO-1	0|1	1	2	0	0.00|0.00	3	0	0	0.9429
MTB	TTHERM_00475140	IP_BHA-CO-2|IP_BHA-CO-1	0|20	20	2	0	0.00|0.00	60	0	0	0.9429
MTB	TTHERM_00443010	IP_BHA-CO-2|IP_BHA-CO-1	0|1	1	2	0	0.00|0.00	0	0	0	0.9429
MTB	TTHERM_00035630	IP_BHA-CO-2|IP_BHA-CO-1	0|1	1	2	0	0.00|0.00	0	0	0	0.9429
MTB	TTHERM_000213644	IP_BHA-CO-2|IP_BHA-CO-1	0|1	1	2	0	0.00|0.00	0	0	0	0.9429
MTB	TTHERM_00485980	IP_BHA-CO-2|IP_BHA-CO-1	0|1	1	2	0	0.00|0.00	0	0	0	0.9429
MTB	TTHERM_00294670	IP_BHA-CO-2|IP_BHA-CO-1	0|8	8	2	0	0.00|0.00	29	0	0	0.9429
MTB	TTHERM_00558350	IP_BHA-CO-2|IP_BHA-CO-1	0|1	1	2	0	0.00|0.00	8	0	0	0.9429
MTB	TTHERM_00140920	IP_BHA-CO-2|IP_BHA-CO-1	0|1	1	2	0	0.00|0.00	2	0	0	0.9429
MTB	TTHERM_01151600	IP_BHA-CO-2|IP_BHA-CO-1	0|19	19	2	0	0.00|0.00	36	0	0	0.9429
MTB	TTHERM_00433680	IP_BHA-CO-2|IP_BHA-CO-1	0|1	1	2	0	0.00|0.00	0	0	0	0.9429
MTB	TTHERM_00581500	IP_BHA-CO-2|IP_BHA-CO-1	0|1	1	2	0	0.00|0.00	0	0	0	0.9429
MTB	TTHERM_01093550	IP_BHA-CO-2|IP_BHA-CO-1	0|2	2	2	0	0.00|0.00	8	0	0	0.9429
MTB	TTHERM_00660330	IP_BHA-CO-2|IP_BHA-CO-1	0|8	8	2	0	0.00|0.00	14	0	0	0.9429
MTB	TTHERM_00715730	IP_BHA-CO-2|IP_BHA-CO-1	0|5	5	2	0	0.00|0.00	10	0	0	0.9429
MTB	TTHERM_00149340	IP_BHA-CO-2|IP_BHA-CO-1	0|3	3	2	0	0.00|0.00	8	0	0	0.9429
MTB	TTHERM_00346530	IP_BHA-CO-2|IP_BHA-CO-1	0|6	6	2	0	0.00|0.00	20	0	0	0.9429
MTB	TTHERM_00377330	IP_BHA-CO-2|IP_BHA-CO-1	0|8	8	2	0	0.00|0.00	26	0	0	0.9429
MTB	TTHERM_00784250	IP_BHA-CO-2|IP_BHA-CO-1	0|1	1	2	0	0.00|0.00	0	0	0	0.9429
MTB	TTHERM_00023990	IP_BHA-CO-2|IP_BHA-CO-1	0|1	1	2	0	0.00|0.00	6	0	0	0.9429
MTB	TTHERM_00343680	IP_BHA-CO-2|IP_BHA-CO-1	0|1	1	2	0	0.00|0.00	0	0	0	0.9429
MTB	TTHERM_00047080	IP_BHA-CO-2|IP_BHA-CO-1	0|18	18	2	0	0.00|0.00	57	0	0	0.9429
MTB	TTHERM_00051840	IP_BHA-CO-2|IP_BHA-CO-1	0|18	18	2	0	0.00|0.00	21	0	0	0.9429
MTB	TTHERM_00571860	IP_BHA-CO-2|IP_BHA-CO-1	1|11	12	2	0	0.00|0.00	68	0	0	0.9429
MTB	TTHERM_00531860	IP_BHA-CO-2|IP_BHA-CO-1	0|3	3	2	0	0.00|0.00	5	0	0	0.9429
MTB	TTHERM_00590130	IP_BHA-CO-2|IP_BHA-CO-1	0|1	1	2	0	0.00|0.00	0	0	0	0.9429
MTB	TTHERM_01053100	IP_BHA-CO-2|IP_BHA-CO-1	0|1	1	2	0	0.00|0.00	0	0	0	0.9429
MTB	TTHERM_00048810	IP_BHA-CO-2|IP_BHA-CO-1	0|1	1	2	0	0.00|0.00	0	0	0	0.9429
MTB	TTHERM_00133500	IP_BHA-CO-2|IP_BHA-CO-1	0|3	3	2	0	0.00|0.00	11	0	0	0.9429
MTB	TTHERM_01076980	IP_BHA-CO-2|IP_BHA-CO-1	0|1	1	2	0	0.00|0.00	0	0	0	0.9429
MTB	TTHERM_00579270	IP_BHA-CO-2|IP_BHA-CO-1	0|2	2	2	0	0.00|0.00	3	0	0	0.9429
MTB	TTHERM_00997720	IP_BHA-CO-2|IP_BHA-CO-1	0|1	1	2	0	0.00|0.00	0	0	0	0.9429
MTB	TTHERM_00571650	IP_BHA-CO-2|IP_BHA-CO-1	1|13	14	2	0	0.00|0.00	134	0	0	0.9429
MTB	TTHERM_01005100	IP_BHA-CO-2|IP_BHA-CO-1	0|1	1	2	0	0.00|0.00	4	0	0	0.9429
MTB	TTHERM_00455630	IP_BHA-CO-2|IP_BHA-CO-1	0|1	1	2	0	0.00|0.00	2	0	0	0.9429
MTB	TTHERM_00339640	IP_BHA-CO-2|IP_BHA-CO-1	0|1	1	2	0	0.00|0.00	6	0	0	0.9429
MTB	TTHERM_000298261	IP_BHA-CO-2|IP_BHA-CO-1	0|1	1	2	0	0.00|0.00	0	0	0	0.9429
MTB	TTHERM_00401980	IP_BHA-CO-2|IP_BHA-CO-1	0|1	1	2	0	0.00|0.00	0	0	0	0.9429
MTB	TTHERM_01142720	IP_BHA-CO-2|IP_BHA-CO-1	0|1	1	2	0	0.00|0.00	0	0	0	0.9429
MTB	TTHERM_00826840	IP_BHA-CO-2|IP_BHA-CO-1	0|1	1	2	0	0.00|0.00	5	0	0	0.9429
MTB	TTHERM_00192090	IP_BHA-CO-2|IP_BHA-CO-1	0|13	13	2	0	0.00|0.00	11	0	0	0.9429
MTB	TTHERM_00686220	IP_BHA-CO-2|IP_BHA-CO-1	0|32	32	2	0	0.00|0.00	22	0	0	0.9429
MTB	TTHERM_00558070	IP_BHA-CO-2|IP_BHA-CO-1	0|1	1	2	0	0.00|0.00	0	0	0	0.9429
MTB	TTHERM_00136120	IP_BHA-CO-2|IP_BHA-CO-1	0|22	22	2	0	0.00|0.00	26	0	0	0.9429
MTB	TTHERM_00529760	IP_BHA-CO-2|IP_BHA-CO-1	0|2	2	2	0	0.00|0.00	6	0	0	0.9429
MTB	TTHERM_00439320	IP_BHA-CO-2|IP_BHA-CO-1	0|1	1	2	0	0.00|0.00	0	0	0	0.9429
MTB	TTHERM_00954380	IP_BHA-CO-2|IP_BHA-CO-1	1|9	10	2	0	0.00|0.00	29	0	0	0.9429
MTB	TTHERM_00219270	IP_BHA-CO-2|IP_BHA-CO-1	0|1	1	2	0	0.00|0.00	0	0	0	0.9429
MTB	TTHERM_00784530	IP_BHA-CO-2|IP_BHA-CO-1	0|1	1	2	0	0.00|0.00	0	0	0	0.9429
MTB	TTHERM_00046310	IP_BHA-CO-2|IP_BHA-CO-1	0|1	1	2	0	0.00|0.00	0	0	0	0.9429
MTB	TTHERM_00147640	IP_BHA-CO-2|IP_BHA-CO-1	0|2	2	2	0	0.00|0.00	3	0	0	0.9429
MTB	TTHERM_00842530	IP_BHA-CO-2|IP_BHA-CO-1	0|4	4	2	0	0.00|0.00	5	0	0	0.9429
MTB	TTHERM_00136440	IP_BHA-CO-2|IP_BHA-CO-1	0|1	1	2	0	0.00|0.00	0	0	0	0.9429
MTB	TTHERM_00448800	IP_BHA-CO-2|IP_BHA-CO-1	0|3	3	2	0	0.00|0.00	3	0	0	0.9429
MTB	TTHERM_00418280	IP_BHA-CO-2|IP_BHA-CO-1	1|2	3	2	0	0.00|0.00	17	0	0	0.9429
MTB	TTHERM_00756450	IP_BHA-CO-2|IP_BHA-CO-1	0|1	1	2	0	0.00|0.00	0	0	0	0.9429
MTB	TTHERM_00683120	IP_BHA-CO-2|IP_BHA-CO-1	0|1	1	2	0	0.00|0.00	0	0	0	0.9429
MTB	TTHERM_01044630	IP_BHA-CO-2|IP_BHA-CO-1	0|1	1	2	0	0.00|0.00	0	0	0	0.9429
MTB	TTHERM_00046920	IP_BHA-CO-2|IP_BHA-CO-1	0|7	7	2	0	0.00|0.00	9	0	0	0.9429
MTB	TTHERM_00549480	IP_BHA-CO-2|IP_BHA-CO-1	0|1	1	2	0	0.00|0.00	2	0	0	0.9429
MTB	TTHERM_00785870	IP_BHA-CO-2|IP_BHA-CO-1	0|1	1	2	0	0.00|0.00	0	0	0	0.9429
MTB	TTHERM_00446240	IP_BHA-CO-2|IP_BHA-CO-1	0|1	1	2	0	0.00|0.00	0	0	0	0.9429
MTB	TTHERM_00780710	IP_BHA-CO-2|IP_BHA-CO-1	0|1	1	2	0	0.00|0.00	0	0	0	0.9429
MTB	TTHERM_00691880	IP_BHA-CO-2|IP_BHA-CO-1	0|1	1	2	0	0.00|0.00	0	0	0	0.9429
MTB	TTHERM_00013620	IP_BHA-CO-2|IP_BHA-CO-1	0|1	1	2	0	0.00|0.00	0	0	0	0.9429
MTB	TTHERM_00654110	IP_BHA-CO-2|IP_BHA-CO-1	0|1	1	2	0	0.00|0.00	0	0	0	0.9429
MTB	TTHERM_00075670	IP_BHA-CO-2|IP_BHA-CO-1	0|10	10	2	0	0.00|0.00	8	0	0	0.9429
MTB	TTHERM_00437600	IP_BHA-CO-2|IP_BHA-CO-1	0|7	7	2	0	0.00|0.00	15	0	0	0.9429
MTB	TTHERM_00780530	IP_BHA-CO-2|IP_BHA-CO-1	0|1	1	2	0	0.00|0.00	0	0	0	0.9429
MTB	TTHERM_00161270	IP_BHA-CO-2|IP_BHA-CO-1	0|1	1	2	0	0.00|0.00	0	0	0	0.9429
MTB	TTHERM_00145440	IP_BHA-CO-2|IP_BHA-CO-1	0|1	1	2	0	0.00|0.00	13	0	0	0.9429
MTB	TTHERM_01141570	IP_BHA-CO-2|IP_BHA-CO-1	0|2	2	2	0	0.00|0.00	4	0	0	0.9429
MTB	TTHERM_00765300	IP_BHA-CO-2|IP_BHA-CO-1	0|14	14	2	0	0.00|0.00	20	0	0	0.9429
MTB	TTHERM_01079140	IP_BHA-CO-2|IP_BHA-CO-1	0|1	1	2	0	0.00|0.00	0	0	0	0.9429
MTB	TTHERM_00333210	IP_BHA-CO-2|IP_BHA-CO-1	0|63	63	2	0	0.00|0.00	92	0	0	0.9429
MTB	TTHERM_00243900	IP_BHA-CO-2|IP_BHA-CO-1	0|1	1	2	0	0.00|0.00	0	0	0	0.9429
MTB	TTHERM_00766500	IP_BHA-CO-2|IP_BHA-CO-1	0|1	1	2	0	0.00|0.00	0	0	0	0.9429
MTB	TTHERM_00695650	IP_BHA-CO-2|IP_BHA-CO-1	0|3	3	2	0	0.00|0.00	11	0	0	0.9429
MTB	TTHERM_00193640	IP_BHA-CO-2|IP_BHA-CO-1	0|22	22	2	0	0.00|0.00	42	0	0	0.9429
MTB	TTHERM_00420030	IP_BHA-CO-2|IP_BHA-CO-1	0|16	16	2	0	0.00|0.00	36	0	0	0.9429
MTB	TTHERM_00290670	IP_BHA-CO-2|IP_BHA-CO-1	0|1	1	2	0	0.00|0.00	3	0	0	0.9429
MTB	TTHERM_00786930	IP_BHA-CO-2|IP_BHA-CO-1	0|4	4	2	0	0.00|0.00	4	0	0	0.9429
MTB	TTHERM_00105410	IP_BHA-CO-2|IP_BHA-CO-1	0|1	1	2	0	0.00|0.00	0	0	0	0.9429
MTB	TTHERM_00052310	IP_BHA-CO-2|IP_BHA-CO-1	0|18	18	2	0	0.00|0.00	84	0	0	0.9429
MTB	TTHERM_00022810	IP_BHA-CO-2|IP_BHA-CO-1	0|10	10	2	0	0.00|0.00	8	0	0	0.9429
MTB	TTHERM_000133669	IP_BHA-CO-2|IP_BHA-CO-1	0|1	1	2	0	0.00|0.00	2	0	0	0.9429
MTB	TTHERM_01050360	IP_BHA-CO-2|IP_BHA-CO-1	0|1	1	2	0	0.00|0.00	0	0	0	0.9429
MTB	TTHERM_00965370	IP_BHA-CO-2|IP_BHA-CO-1	0|1	1	2	0	0.00|0.00	0	0	0	0.9429
MTB	TTHERM_01179780	IP_BHA-CO-2|IP_BHA-CO-1	0|4	4	2	0	0.00|0.00	4	0	0	0.9429
MTB	TTHERM_00378620	IP_BHA-CO-2|IP_BHA-CO-1	0|1	1	2	0	0.00|0.00	18	0	0	0.9429
MTB	TTHERM_00127260	IP_BHA-CO-2|IP_BHA-CO-1	0|1	1	2	0	0.00|0.00	14	0	0	0.9429
MTB	TTHERM_00655820	IP_BHA-CO-2|IP_BHA-CO-1	0|47	47	2	0	0.00|0.00	126	0	0	0.9429
MTB	TTHERM_00343480	IP_BHA-CO-2|IP_BHA-CO-1	0|1	1	2	0	0.00|0.00	0	0	0	0.9429
MTB	TTHERM_01108480	IP_BHA-CO-2|IP_BHA-CO-1	0|1	1	2	0	0.00|0.00	0	0	0	0.9429
MTB	TTHERM_01485670	IP_BHA-CO-2|IP_BHA-CO-1	0|1	1	2	0	0.00|0.00	0	0	0	0.9429
MTB	TTHERM_00655440	IP_BHA-CO-2|IP_BHA-CO-1	0|1	1	2	0	0.00|0.00	11	0	0	0.9429
MTB	TTHERM_00297140	IP_BHA-CO-2|IP_BHA-CO-1	0|10	10	2	0	0.00|0.00	10	0	0	0.9429
MTB	TTHERM_00444670	IP_BHA-CO-2|IP_BHA-CO-1	0|9	9	2	0	0.00|0.00	14	0	0	0.9429
MTB	TTHERM_01109790	IP_BHA-CO-2|IP_BHA-CO-1	0|5	5	2	0	0.00|0.00	12	0	0	0.9429
MTB	TTHERM_00691520	IP_BHA-CO-2|IP_BHA-CO-1	0|1	1	2	0	0.00|0.00	7	0	0	0.9429
MTB	TTHERM_00502380	IP_BHA-CO-2|IP_BHA-CO-1	0|10	10	2	0	0.00|0.00	69	0	0	0.9429
MTB	TTHERM_00006260	IP_BHA-CO-2|IP_BHA-CO-1	0|1	1	2	0	0.00|0.00	0	0	0	0.9429
MTB	TTHERM_01109770	IP_BHA-CO-2|IP_BHA-CO-1	0|12	12	2	0	0.00|0.00	34	0	0	0.9429
MTB	TTHERM_00706300	IP_BHA-CO-2|IP_BHA-CO-1	0|14	14	2	0	0.00|0.00	15	0	0	0.9429
MTB	TTHERM_00691710	IP_BHA-CO-2|IP_BHA-CO-1	0|1	1	2	0	0.00|0.00	0	0	0	0.9429
MTB	TTHERM_00221110	IP_BHA-CO-2|IP_BHA-CO-1	0|2	2	2	0	0.00|0.00	8	0	0	0.9429
MTB	TTHERM_00138600	IP_BHA-CO-2|IP_BHA-CO-1	9|96	105	2	0	0.00|0.00	1402	0	0	0.9429
MTB	TTHERM_00194260	IP_BHA-CO-2|IP_BHA-CO-1	0|3	3	2	0	0.00|0.00	30	0	0	0.9429
MTB	TTHERM_00565630	IP_BHA-CO-2|IP_BHA-CO-1	0|1	1	2	0	0.00|0.00	0	0	0	0.9429
MTB	TTHERM_00375130	IP_BHA-CO-2|IP_BHA-CO-1	0|3	3	2	0	0.00|0.00	7	0	0	0.9429
MTB	TTHERM_00864870	IP_BHA-CO-2|IP_BHA-CO-1	0|14	14	2	0	0.00|0.00	57	0	0	0.9429
MTB	TTHERM_00984990	IP_BHA-CO-2|IP_BHA-CO-1	0|1	1	2	0	0.00|0.00	7	0	0	0.9429
MTB	TTHERM_00600630	IP_BHA-CO-2|IP_BHA-CO-1	0|2	2	2	0	0.00|0.00	4	0	0	0.9429
MTB	TTHERM_01508150	IP_BHA-CO-2|IP_BHA-CO-1	0|1	1	2	0	0.00|0.00	0	0	0	0.9429
MTB	TTHERM_00632821	IP_BHA-CO-2|IP_BHA-CO-1	0|1	1	2	0	0.00|0.00	0	0	0	0.9429
MTB	TTHERM_00770740	IP_BHA-CO-2|IP_BHA-CO-1	0|1	1	2	0	0.00|0.00	0	0	0	0.9429
MTB	TTHERM_00295700	IP_BHA-CO-2|IP_BHA-CO-1	0|4	4	2	0	0.00|0.00	5	0	0	0.9429
MTB	TTHERM_00037060	IP_BHA-CO-2|IP_BHA-CO-1	0|8	8	2	0	0.00|0.00	17	0	0	0.9429
MTB	TTHERM_000079459	IP_BHA-CO-2|IP_BHA-CO-1	0|2	2	2	0	0.00|0.00	15	0	0	0.9429
MTB	TTHERM_00923170	IP_BHA-CO-2|IP_BHA-CO-1	1|0	1	2	0	0.00|0.00	0	0	0	0.9429
MTB	TTHERM_00347970	IP_BHA-CO-2|IP_BHA-CO-1	0|1	1	2	0	0.00|0.00	0	0	0	0.9429
MTB	TTHERM_00622710	IP_BHA-CO-2|IP_BHA-CO-1	0|8	8	2	0	0.00|0.00	30	0	0	0.9429
MTB	TTHERM_00467520	IP_BHA-CO-2|IP_BHA-CO-1	0|1	1	2	0	0.00|0.00	0	0	0	0.9429
MTB	TTHERM_00933070	IP_BHA-CO-2|IP_BHA-CO-1	0|1	1	2	0	0.00|0.00	0	0	0	0.9429
MTB	TTHERM_00052180	IP_BHA-CO-2|IP_BHA-CO-1	0|1	1	2	0	0.00|0.00	0	0	0	0.9429
MTB	TTHERM_00884600	IP_BHA-CO-2|IP_BHA-CO-1	0|1	1	2	0	0.00|0.00	0	0	0	0.9429
MTB	TTHERM_00954340	IP_BHA-CO-2|IP_BHA-CO-1	0|1	1	2	0	0.00|0.00	0	0	0	0.9429
MTB	TTHERM_00053800	IP_BHA-CO-2|IP_BHA-CO-1	0|1	1	2	0	0.00|0.00	3	0	0	0.9429
MTB	TTHERM_000338239	IP_BHA-CO-2|IP_BHA-CO-1	0|15	15	2	0	0.00|0.00	15	0	0	0.9429
MTB	TTHERM_01129660	IP_BHA-CO-2|IP_BHA-CO-1	0|6	6	2	0	0.00|0.00	7	0	0	0.9429
MTB	TTHERM_00127170	IP_BHA-CO-2|IP_BHA-CO-1	0|1	1	2	0	0.00|0.00	0	0	0	0.9429
MTB	TTHERM_00670170	IP_BHA-CO-2|IP_BHA-CO-1	0|16	16	2	0	0.00|0.00	13	0	0	0.9429
MTB	TTHERM_01014420	IP_BHA-CO-2|IP_BHA-CO-1	0|1	1	2	0	0.00|0.00	0	0	0	0.9429
MTB	TTHERM_00627200	IP_BHA-CO-2|IP_BHA-CO-1	0|1	1	2	0	0.00|0.00	0	0	0	0.9429
MTB	TTHERM_00732640	IP_BHA-CO-2|IP_BHA-CO-1	0|12	12	2	0	0.00|0.00	9	0	0	0.9429
MTB	TTHERM_00826920	IP_BHA-CO-2|IP_BHA-CO-1	0|1	1	2	0	0.00|0.00	0	0	0	0.9429
MTB	TTHERM_00941500	IP_BHA-CO-2|IP_BHA-CO-1	0|1	1	2	0	0.00|0.00	0	0	0	0.9429
MTB	TTHERM_00378560	IP_BHA-CO-2|IP_BHA-CO-1	0|9	9	2	0	0.00|0.00	17	0	0	0.9429
MTB	TTHERM_00196620	IP_BHA-CO-2|IP_BHA-CO-1	0|1	1	2	0	0.00|0.00	0	0	0	0.9429
MTB	TTHERM_00998940	IP_BHA-CO-2|IP_BHA-CO-1	0|4	4	2	0	0.00|0.00	17	0	0	0.9429
MTB	TTHERM_00382350	IP_BHA-CO-2|IP_BHA-CO-1	0|23	23	2	0	0.00|0.00	19	0	0	0.9429
MTB	TTHERM_000529879	IP_BHA-CO-2|IP_BHA-CO-1	0|1	1	2	0	0.00|0.00	0	0	0	0.9429
MTB	TTHERM_00926980	IP_BHA-CO-2|IP_BHA-CO-1	0|16	16	2	0	0.00|0.00	61	0	0	0.9429
MTB	TTHERM_01044770	IP_BHA-CO-2|IP_BHA-CO-1	0|1	1	2	0	0.00|0.00	0	0	0	0.9429
MTB	TTHERM_00813040	IP_BHA-CO-2|IP_BHA-CO-1	0|10	10	2	0	0.00|0.00	9	0	0	0.9429
MTB	TTHERM_00446310	IP_BHA-CO-2|IP_BHA-CO-1	0|1	1	2	0	0.00|0.00	0	0	0	0.9429
MTB	TTHERM_00402070	IP_BHA-CO-2|IP_BHA-CO-1	0|1	1	2	0	0.00|0.00	2	0	0	0.9429
MTB	TTHERM_00494490	IP_BHA-CO-2|IP_BHA-CO-1	0|1	1	2	0	0.00|0.00	0	0	0	0.9429
MTB	TTHERM_00497990	IP_BHA-CO-2|IP_BHA-CO-1	0|1	1	2	0	0.00|0.00	2	0	0	0.9429
MTB	TTHERM_00147510	IP_BHA-CO-2|IP_BHA-CO-1	0|8	8	2	0	0.00|0.00	12	0	0	0.9429
MTB	TTHERM_00713190	IP_BHA-CO-2|IP_BHA-CO-1	0|2	2	2	0	0.00|0.00	9	0	0	0.9429
MTB	TTHERM_01081650	IP_BHA-CO-2|IP_BHA-CO-1	0|1	1	2	0	0.00|0.00	0	0	0	0.9429
MTB	TTHERM_00836580	IP_BHA-CO-2|IP_BHA-CO-1	0|48	48	2	0	0.00|0.00	115	0	0	0.9429
MTB	TTHERM_00376200	IP_BHA-CO-2|IP_BHA-CO-1	0|1	1	2	0	0.00|0.00	0	0	0	0.9429
MTB	TTHERM_00185230	IP_BHA-CO-2|IP_BHA-CO-1	0|3	3	2	0	0.00|0.00	17	0	0	0.9429
MTB	TTHERM_01016220	IP_BHA-CO-2|IP_BHA-CO-1	0|1	1	2	0	0.00|0.00	0	0	0	0.9429
MTB	TTHERM_00550810	IP_BHA-CO-2|IP_BHA-CO-1	0|32	32	2	0	0.00|0.00	27	0	0	0.9429
MTB	TTHERM_00550700	IP_BHA-CO-2|IP_BHA-CO-1	0|1	1	2	0	0.00|0.00	4	0	0	0.9429
MTB	TTHERM_00077450	IP_BHA-CO-2|IP_BHA-CO-1	0|11	11	2	0	0.00|0.00	12	0	0	0.9429
MTB	TTHERM_000763039	IP_BHA-CO-2|IP_BHA-CO-1	0|1	1	2	0	0.00|0.00	0	0	0	0.9429
MTB	TTHERM_00127100	IP_BHA-CO-2|IP_BHA-CO-1	0|1	1	2	0	0.00|0.00	3	0	0	0.9429
MTB	TTHERM_00035520	IP_BHA-CO-2|IP_BHA-CO-1	0|1	1	2	0	0.00|0.00	2	0	0	0.9429
MTB	TTHERM_000802459	IP_BHA-CO-2|IP_BHA-CO-1	0|3	3	2	0	0.00|0.00	14	0	0	0.9429
MTB	TTHERM_01002870	IP_BHA-CO-2|IP_BHA-CO-1	0|5	5	2	0	0.00|0.00	126	0	0	0.9429
[truncated: 1,827 more rows]
